# Supplementary material for: The genomic landscape of meiotic crossovers and gene conversions in Arabidopsis thaliana
Source: PubMed Central journal article supplement (PMC3865688; doi:10.7554/elife.01426), 2013-12-17

# ID1

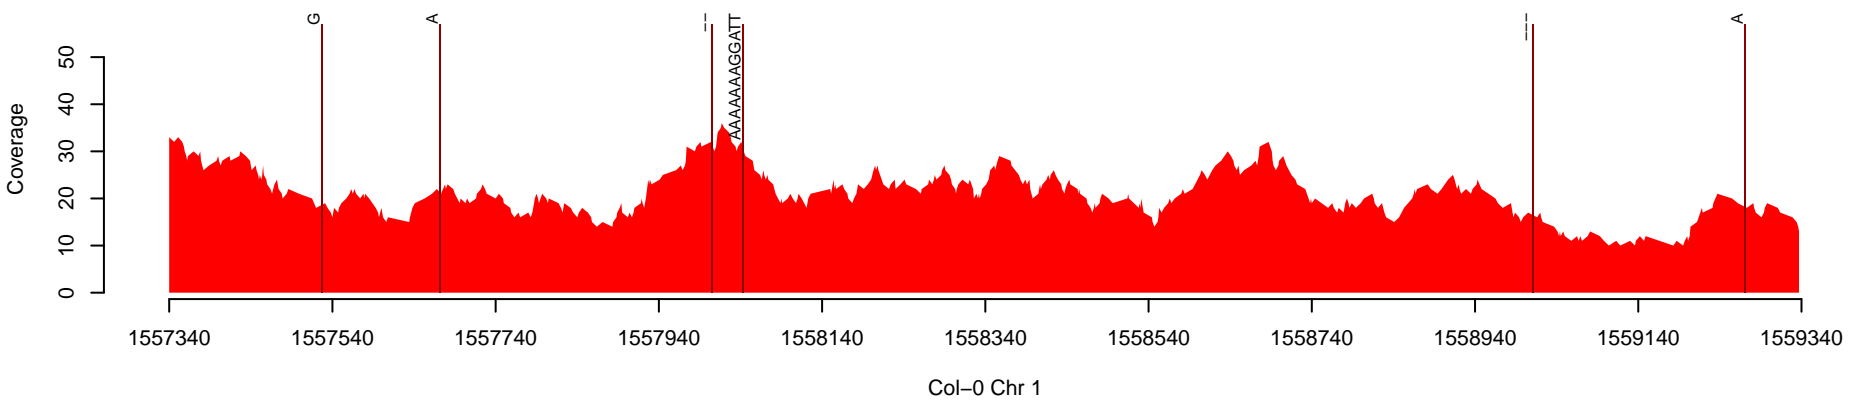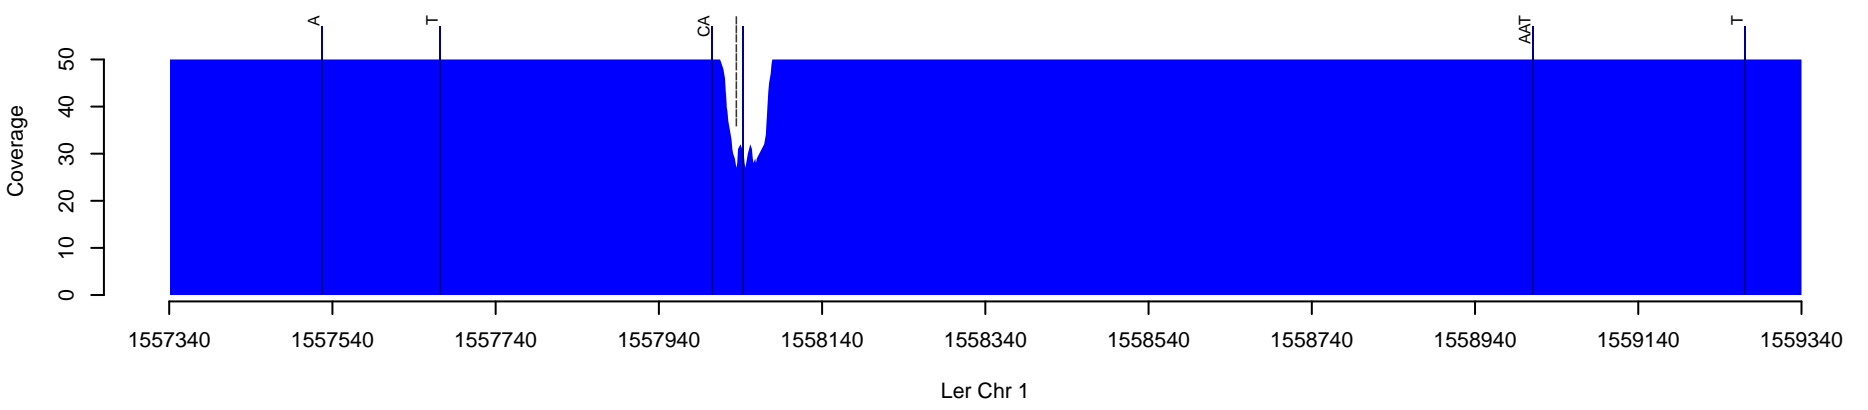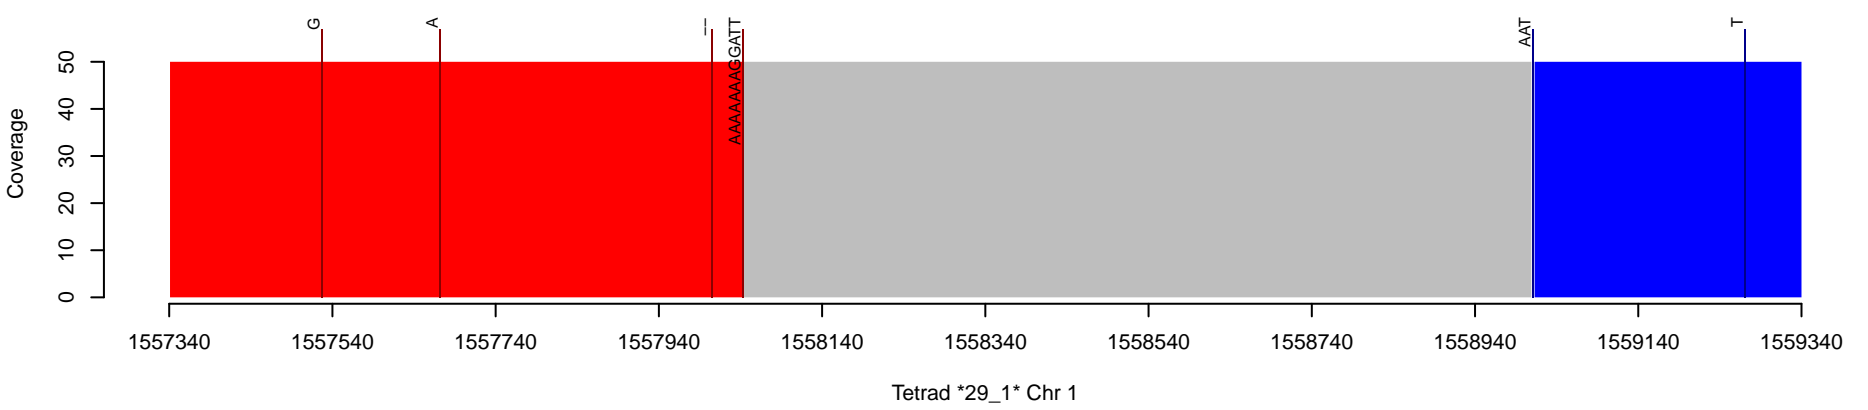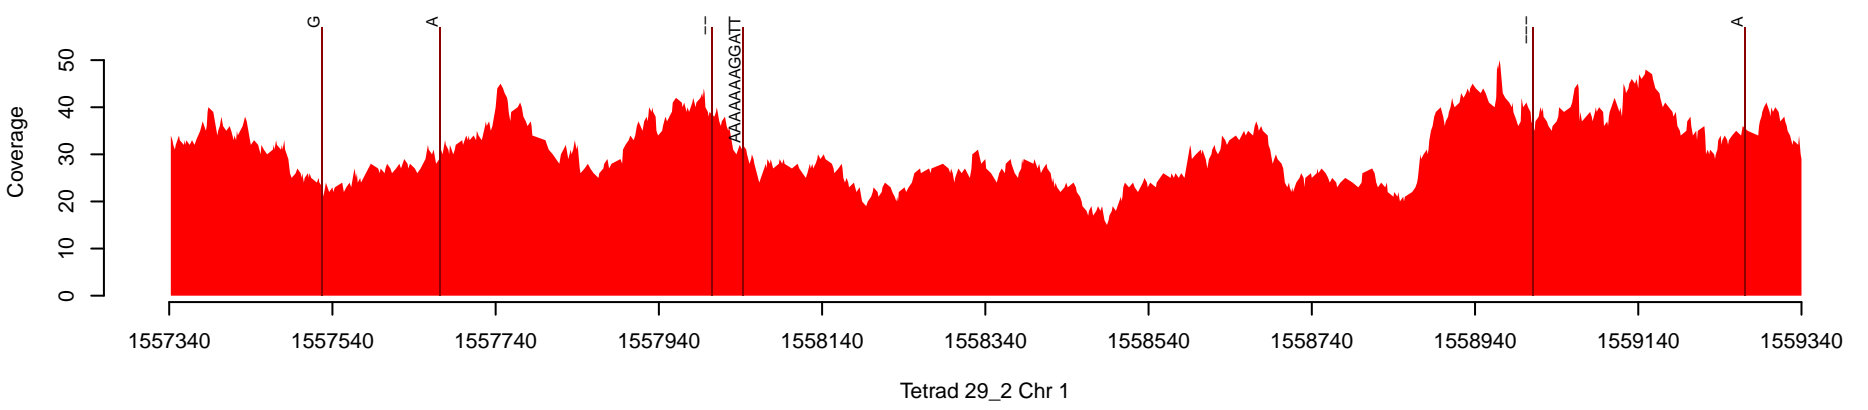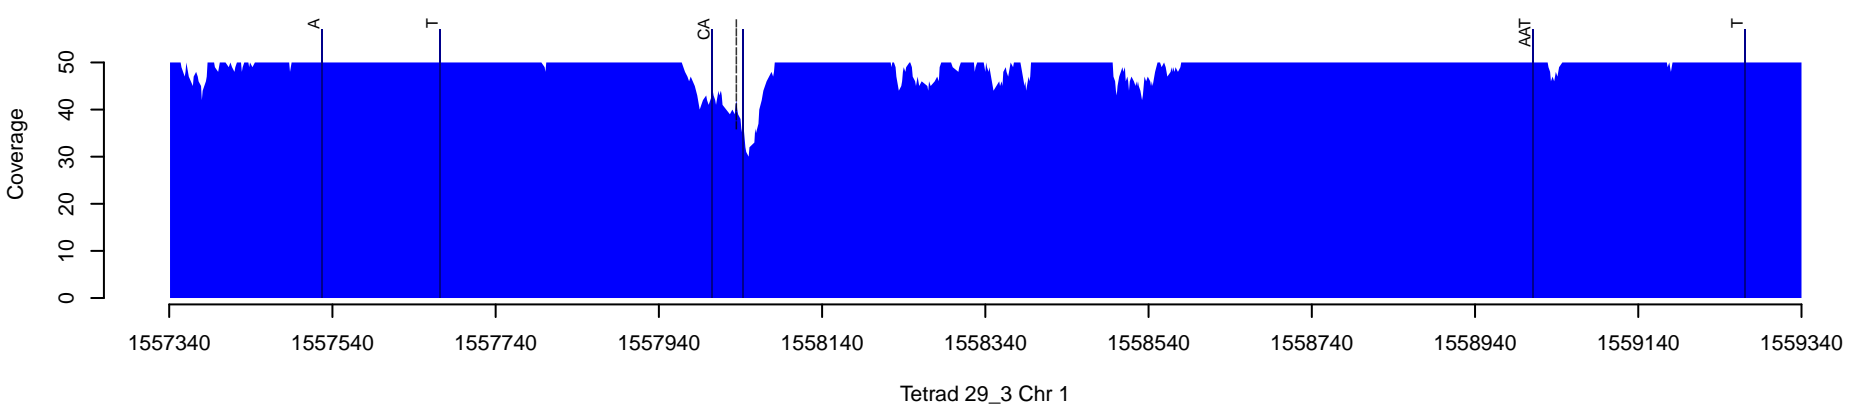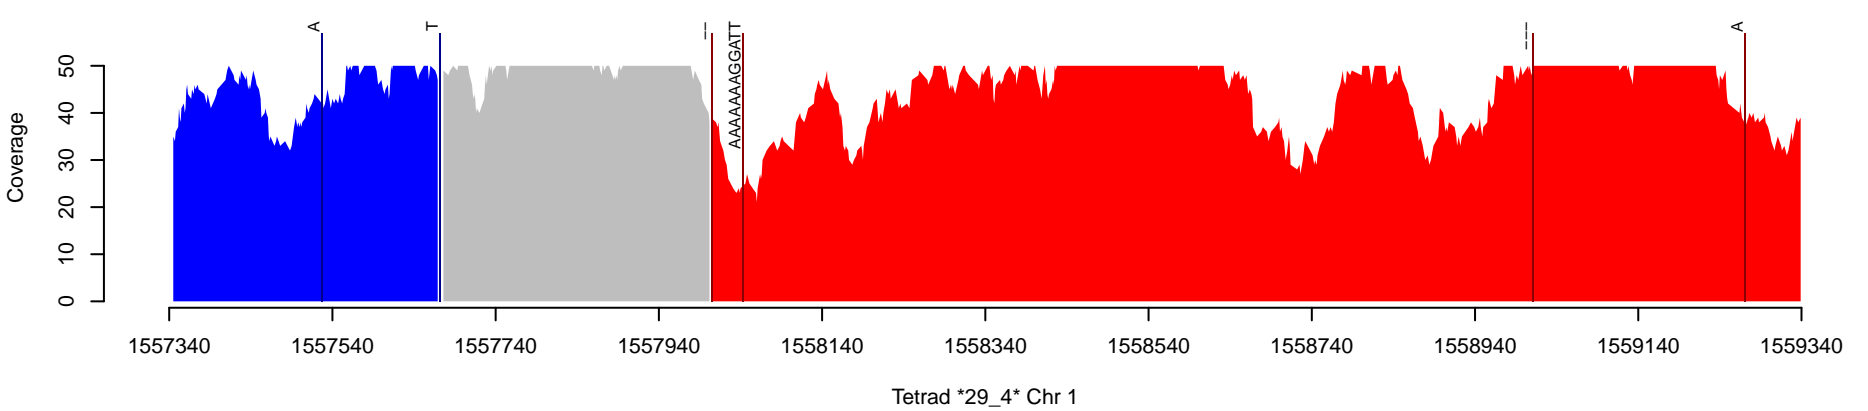

# ID2

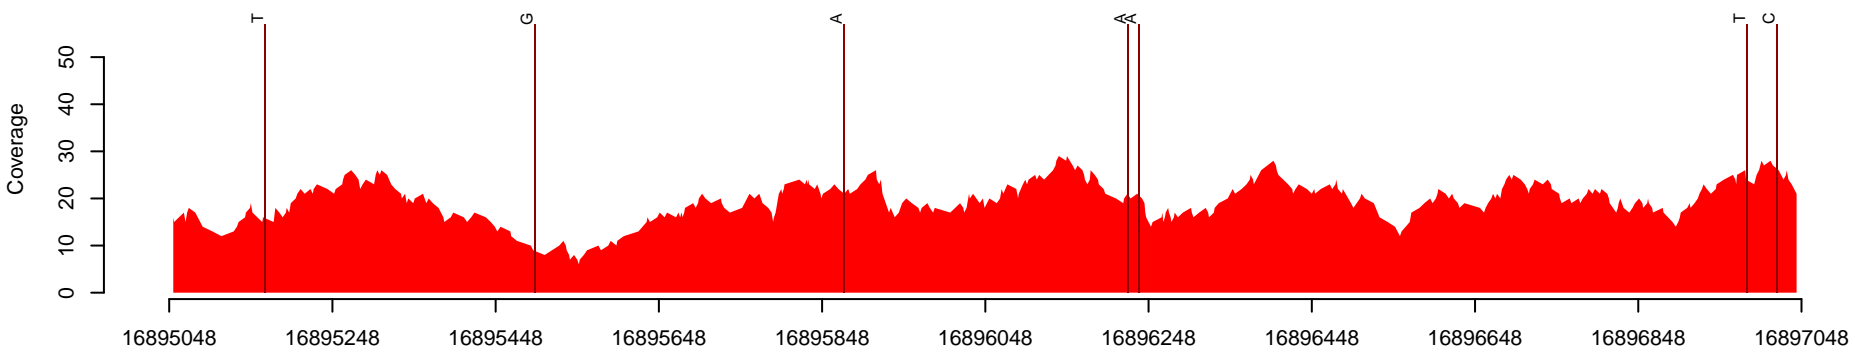

Col-0 Chr 1

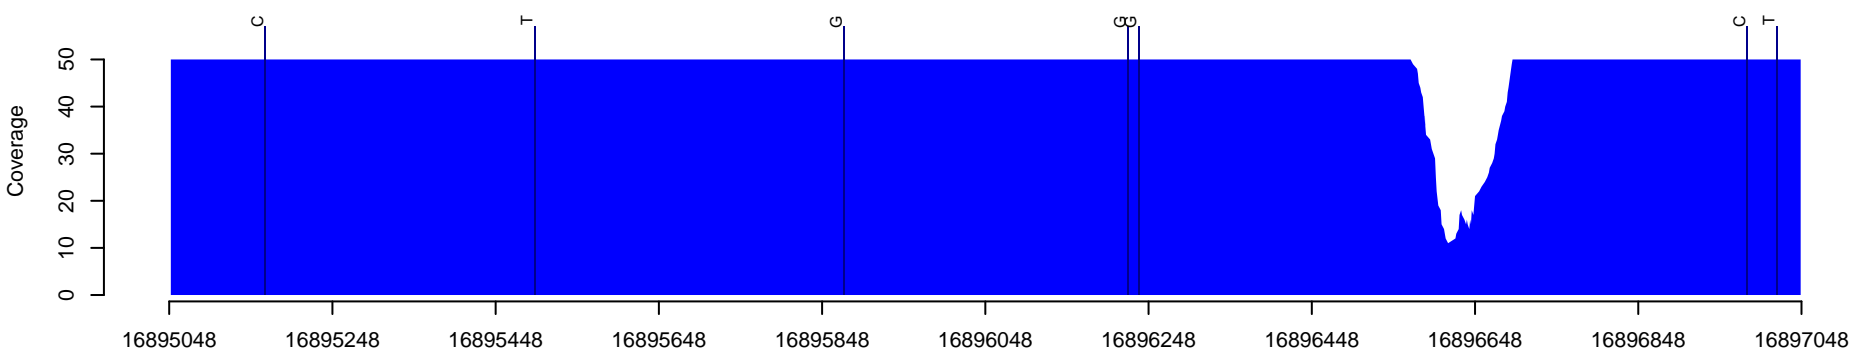

Ler Chr 1

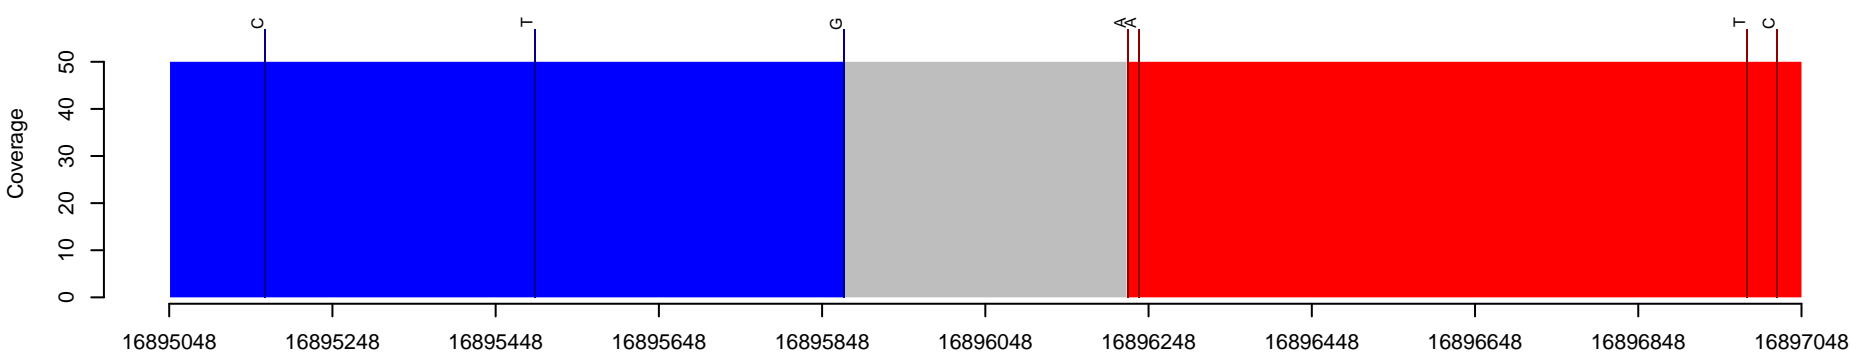

Tetrads \*29\_1\* Chr 1

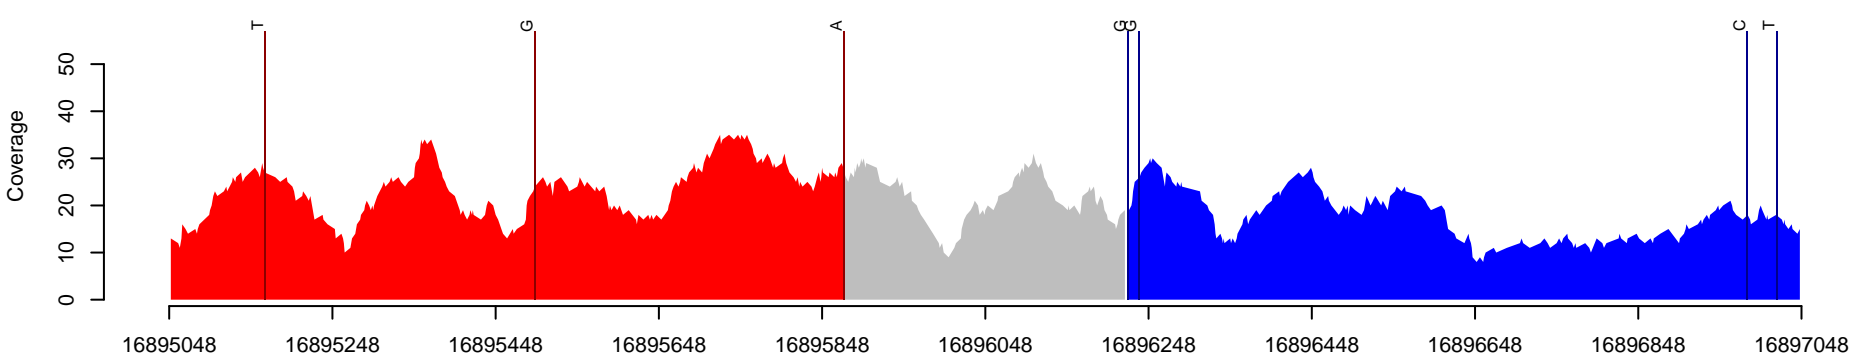

Tetrads \*29\_2\* Chr 1

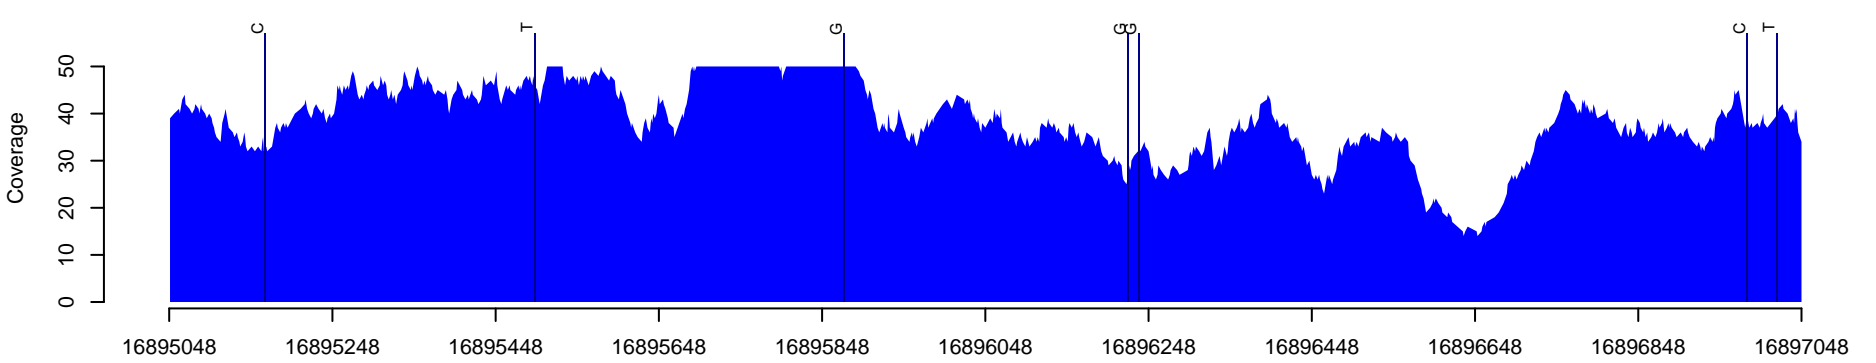

Tetrads 29\_3 Chr 1

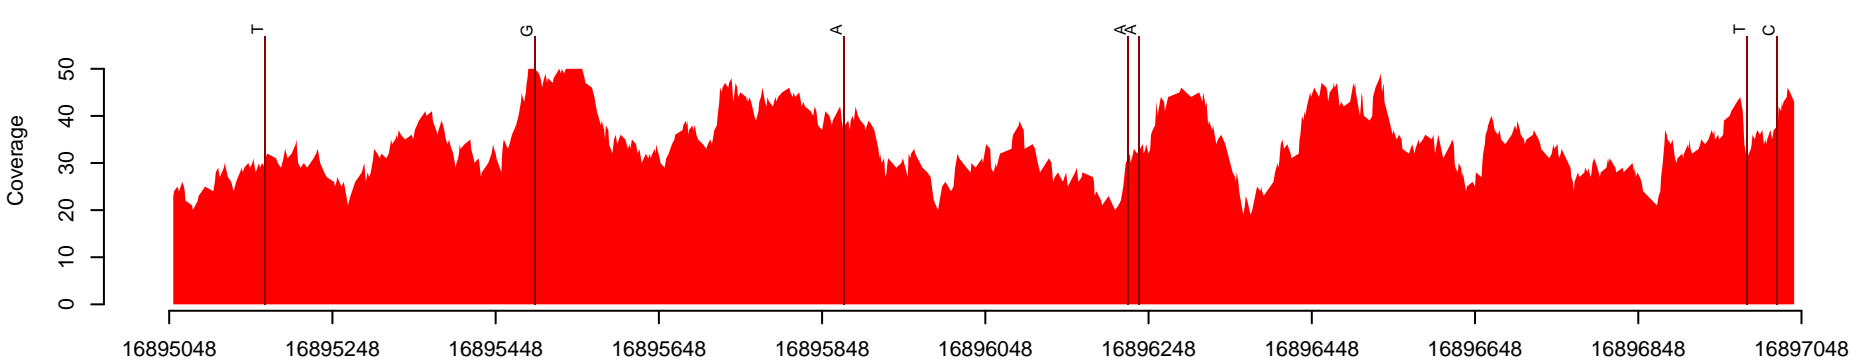

Tetrads 29\_4 Chr 1

# ID3

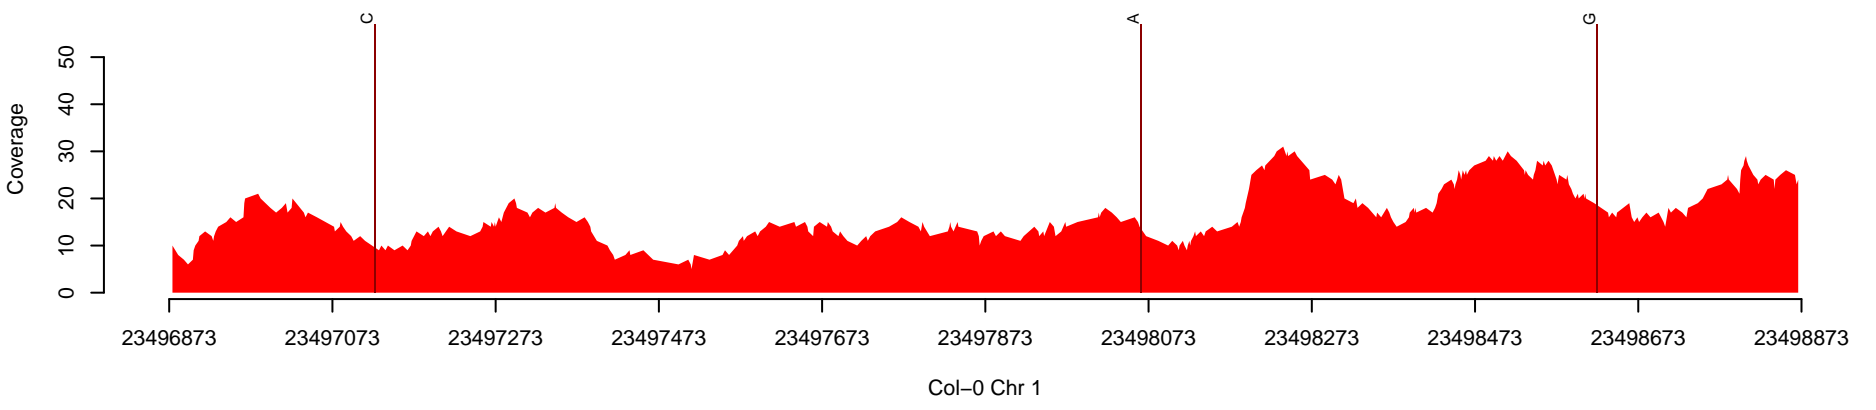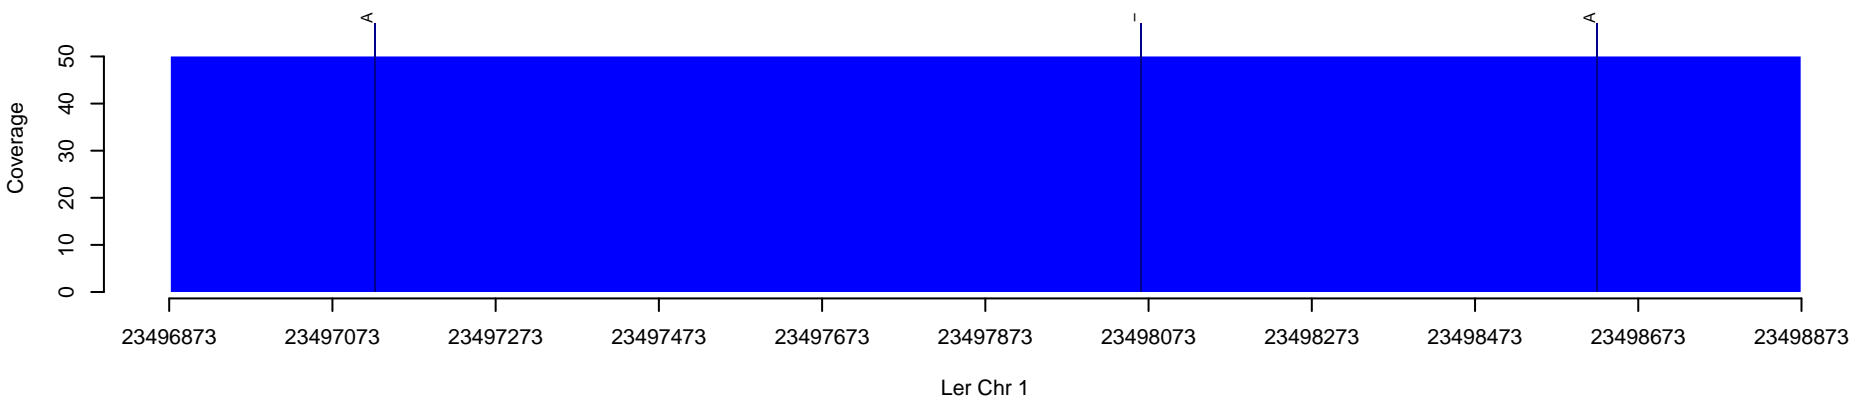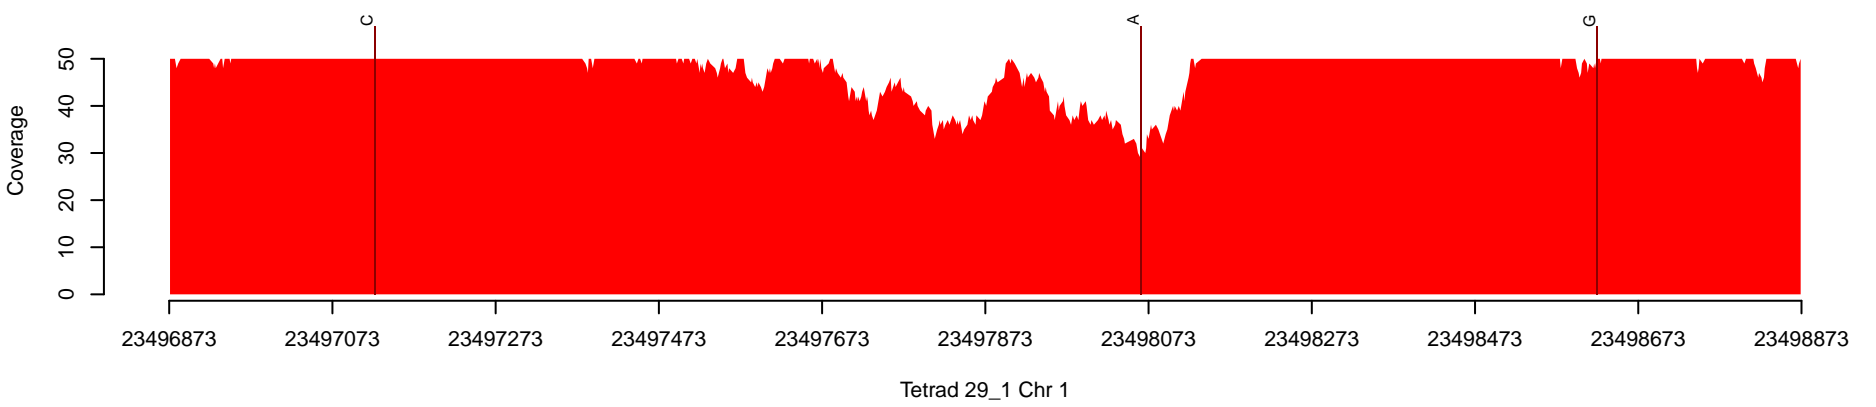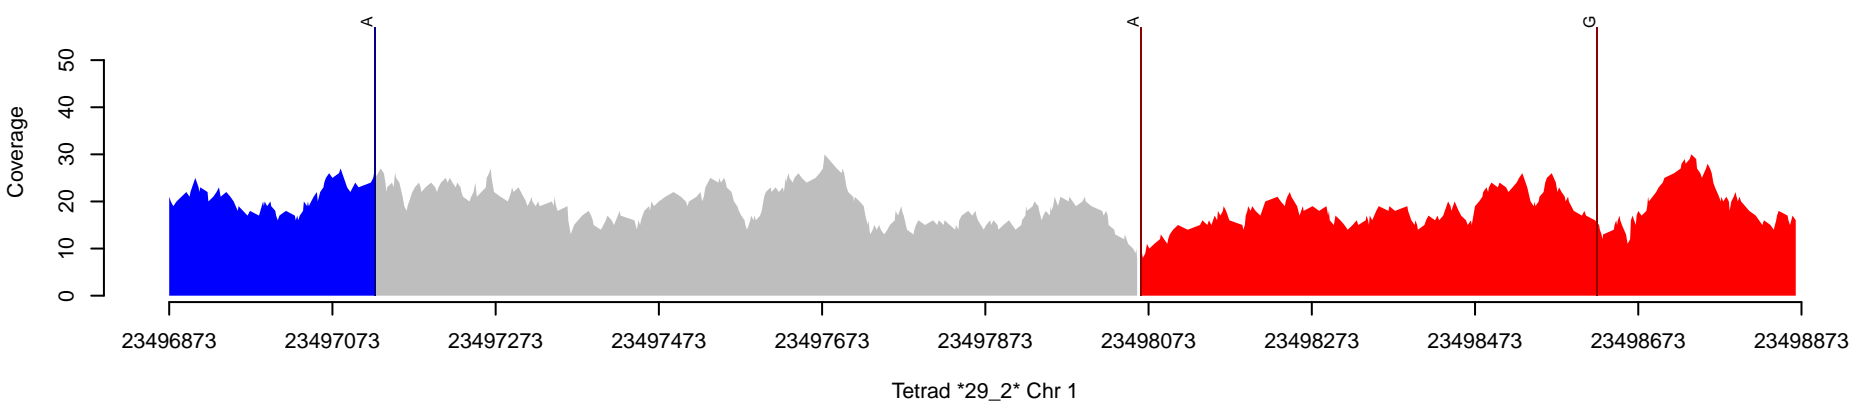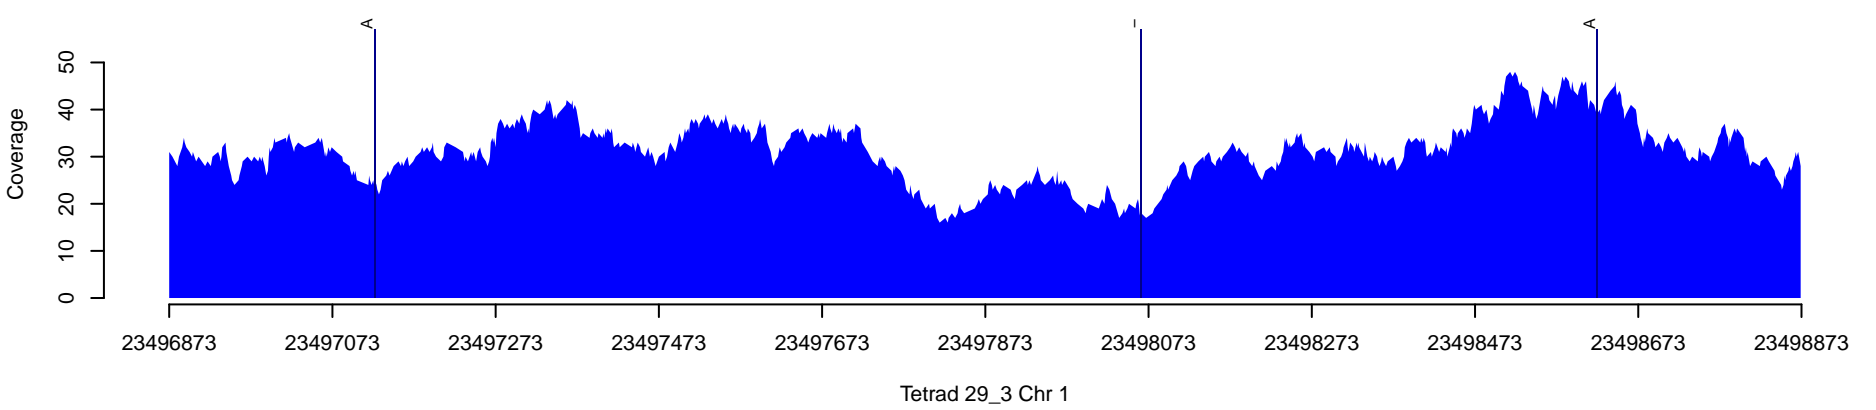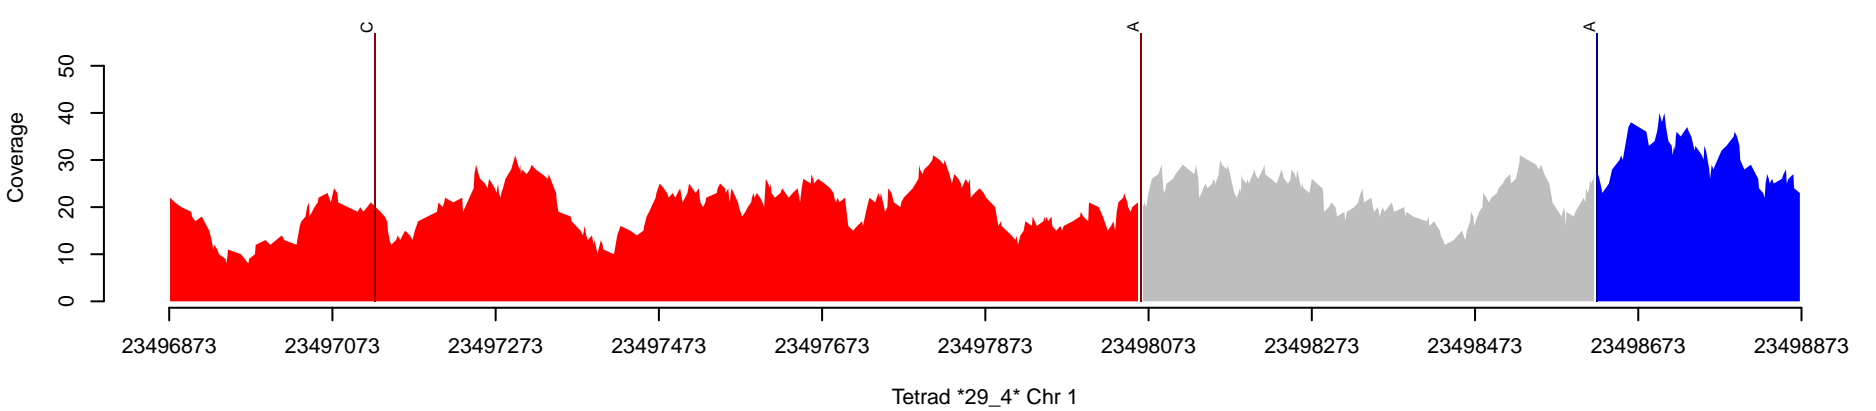

# ID4

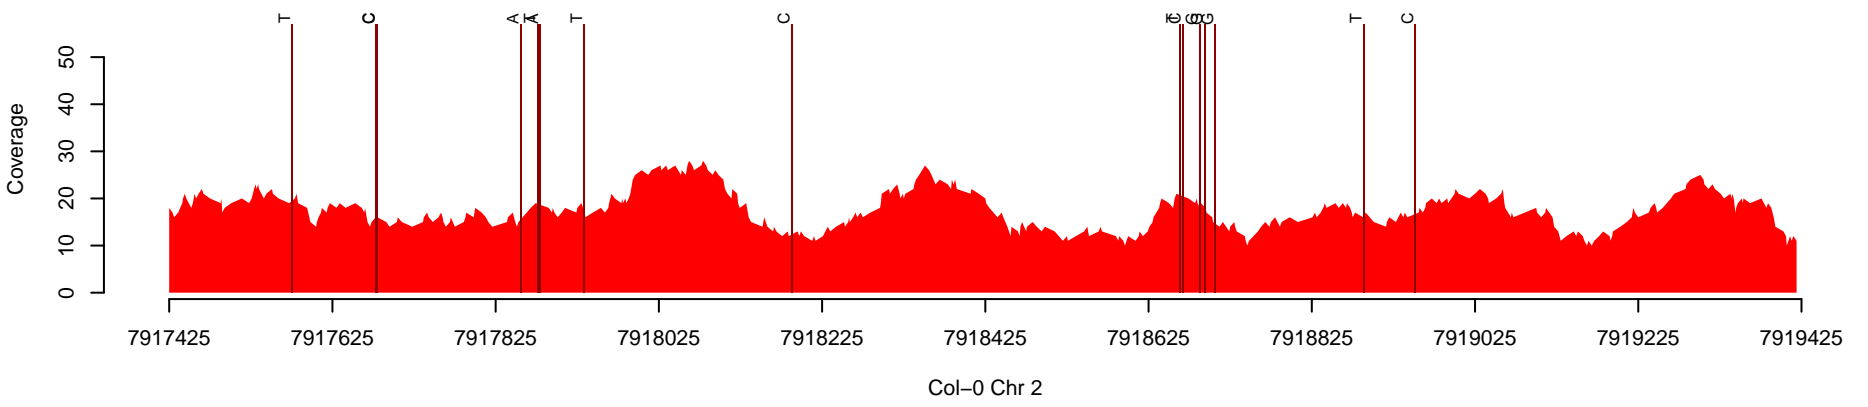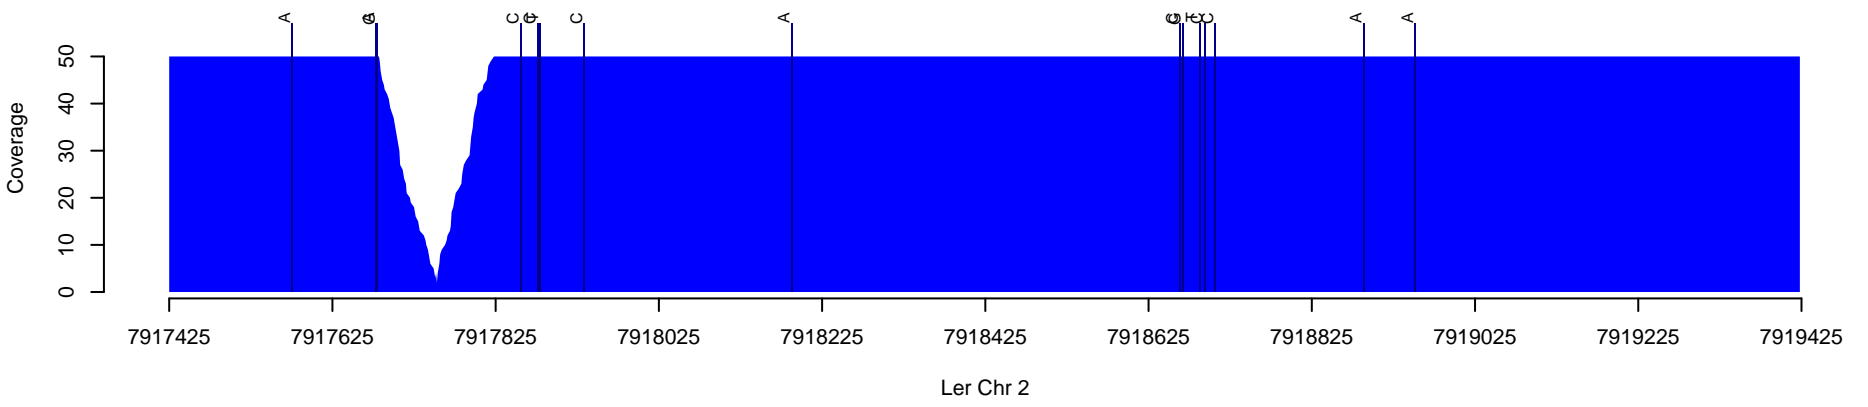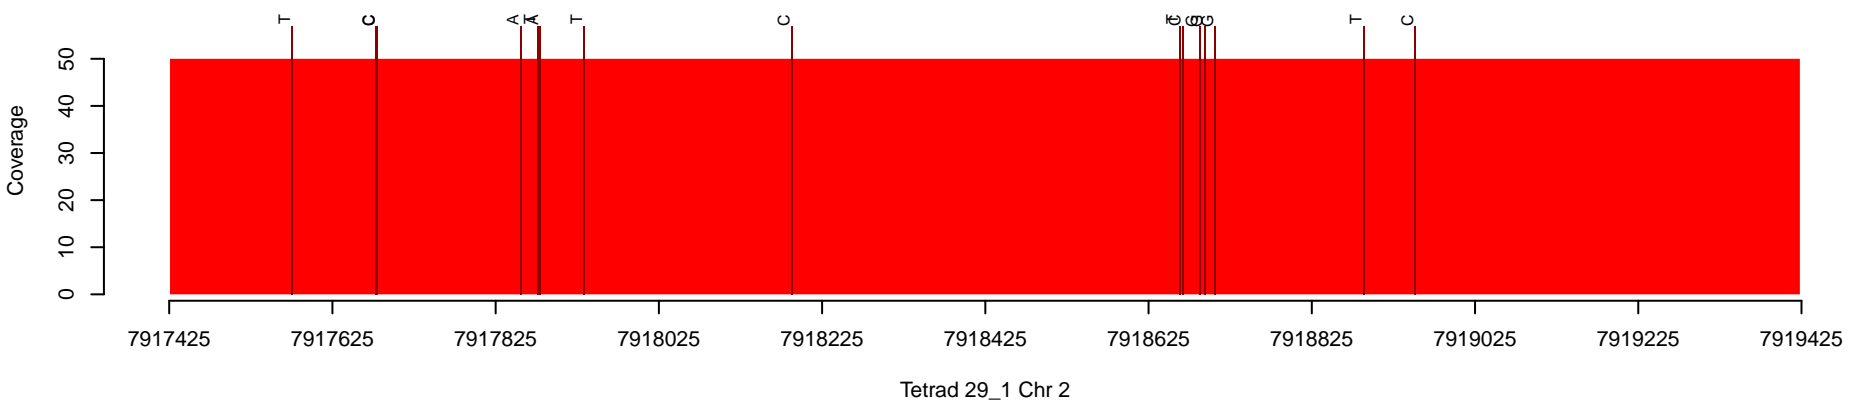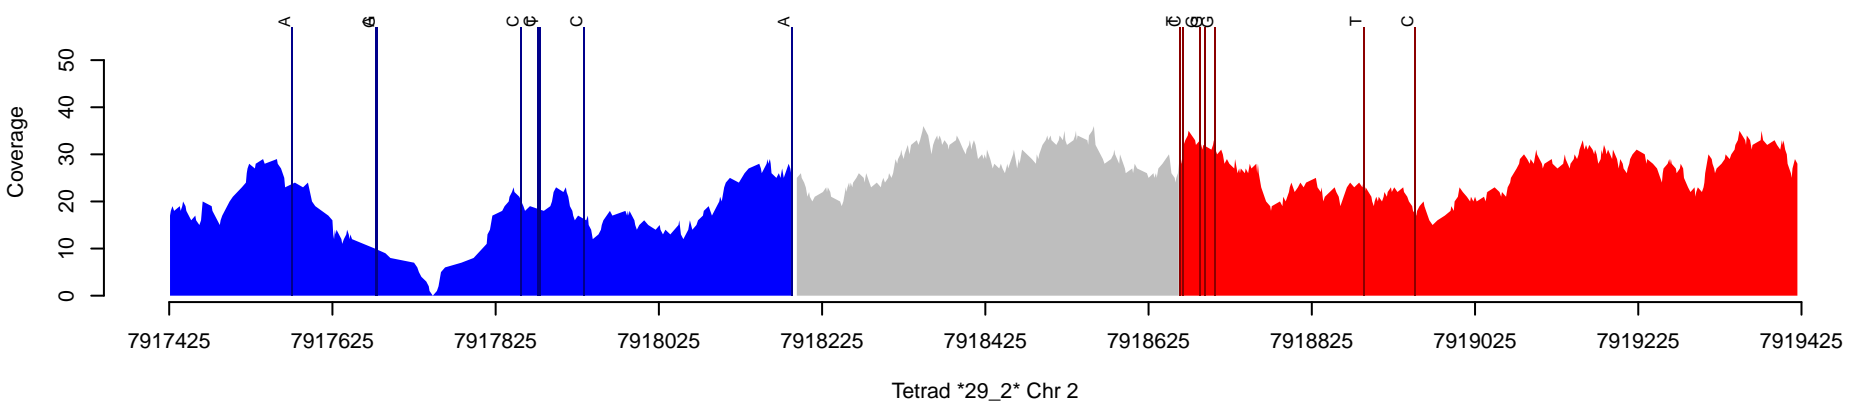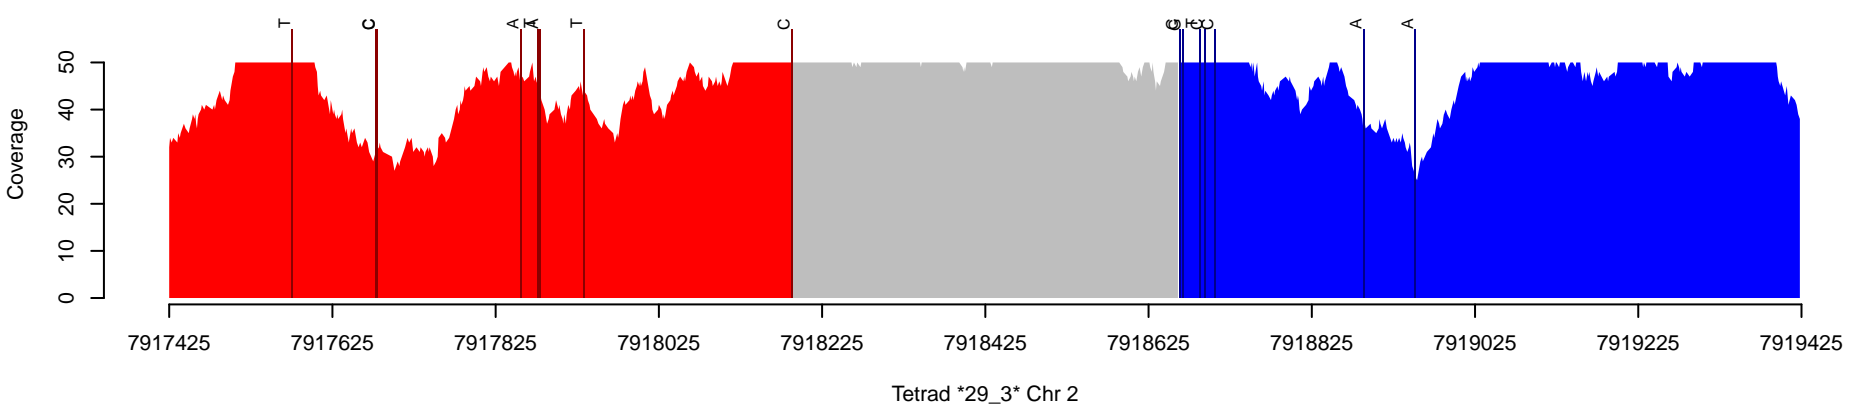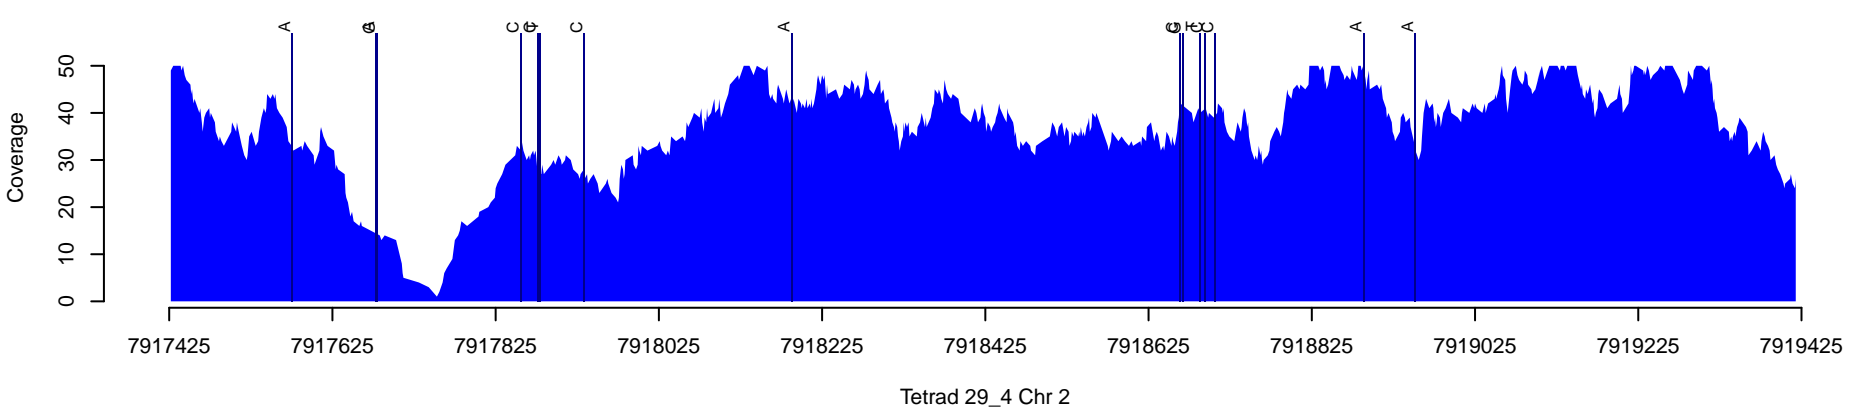

# ID5

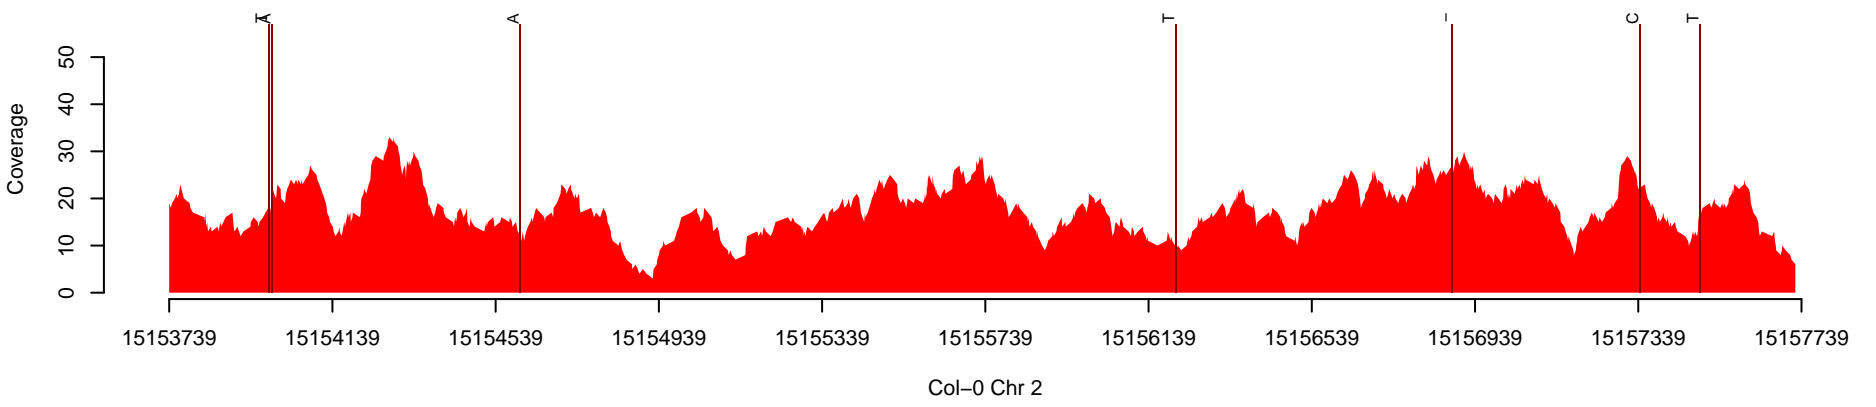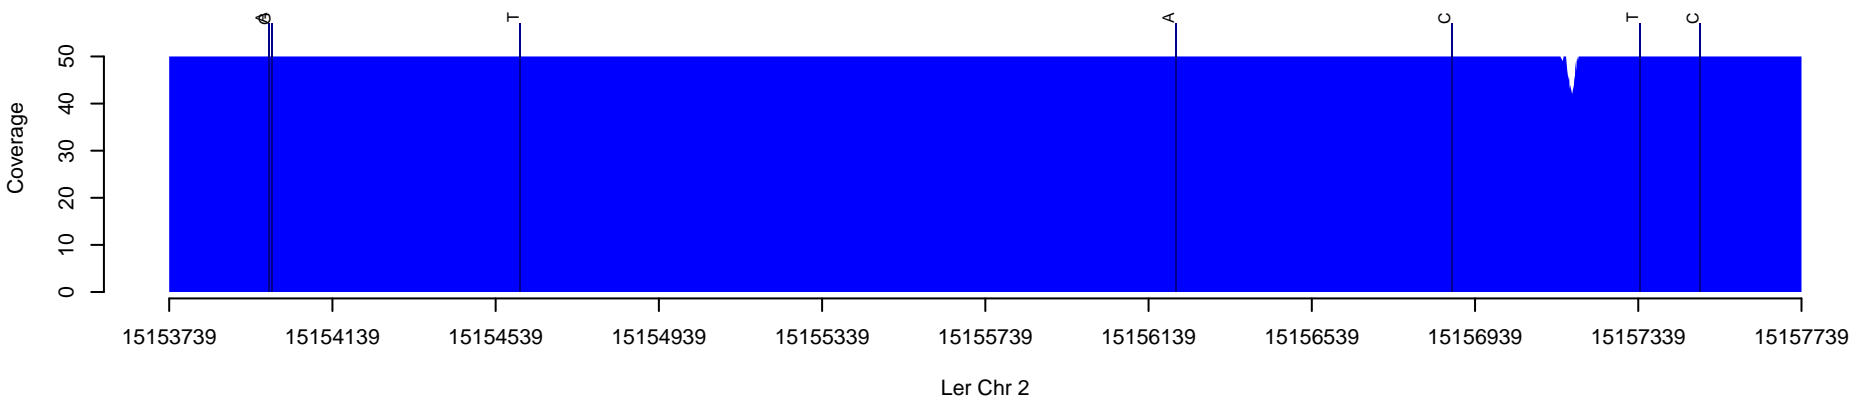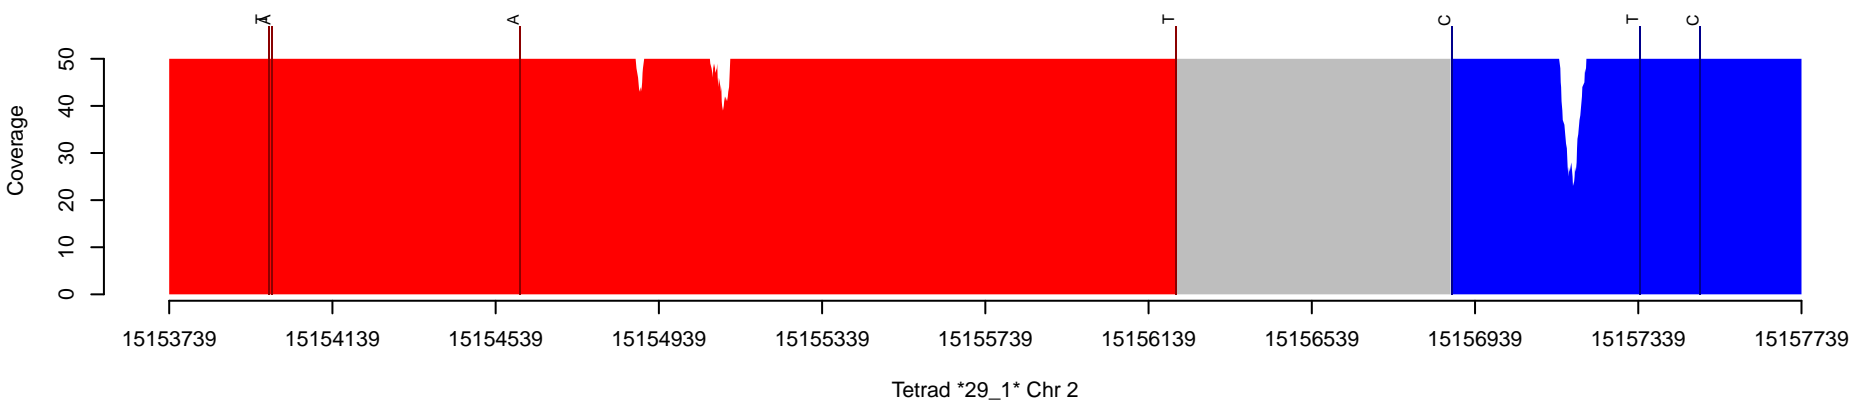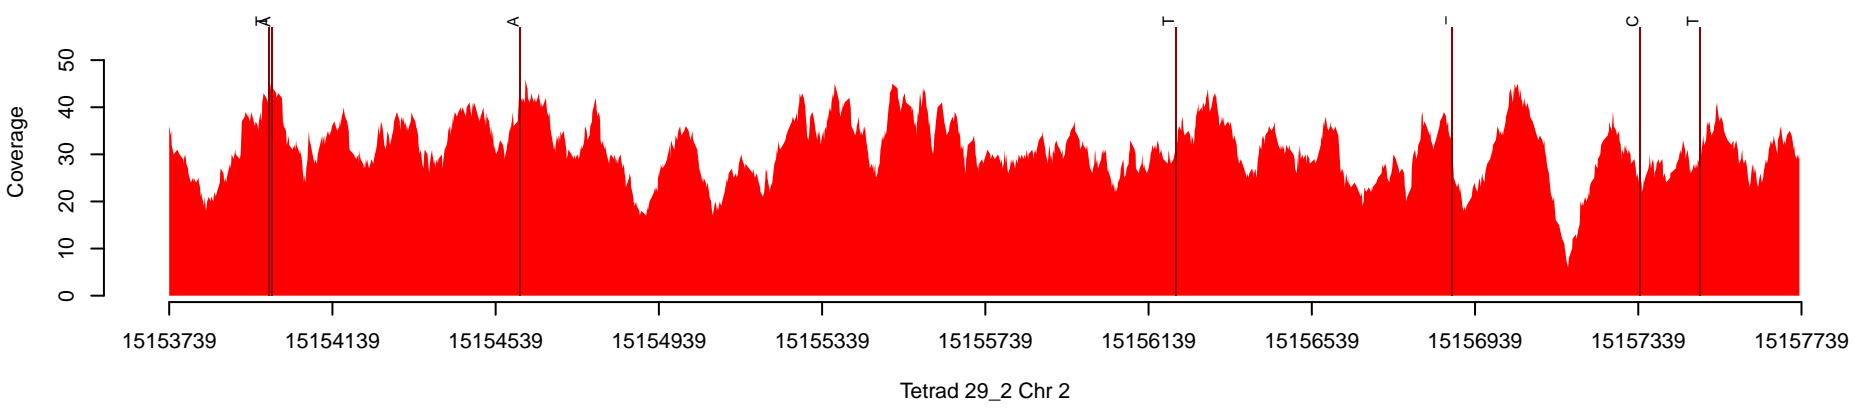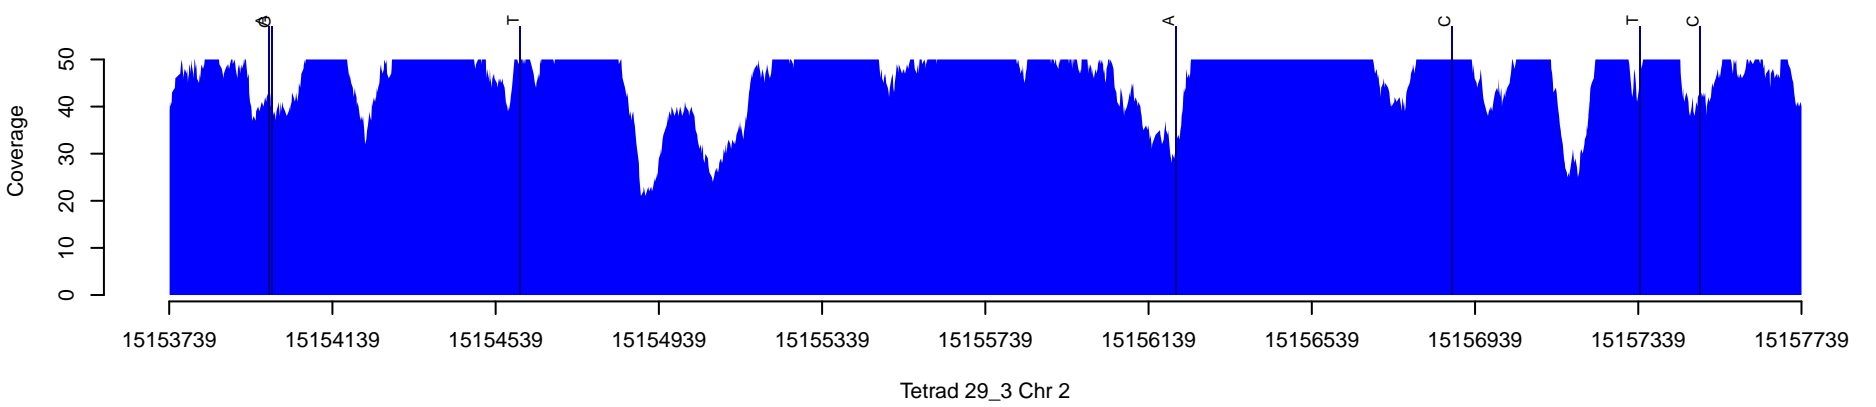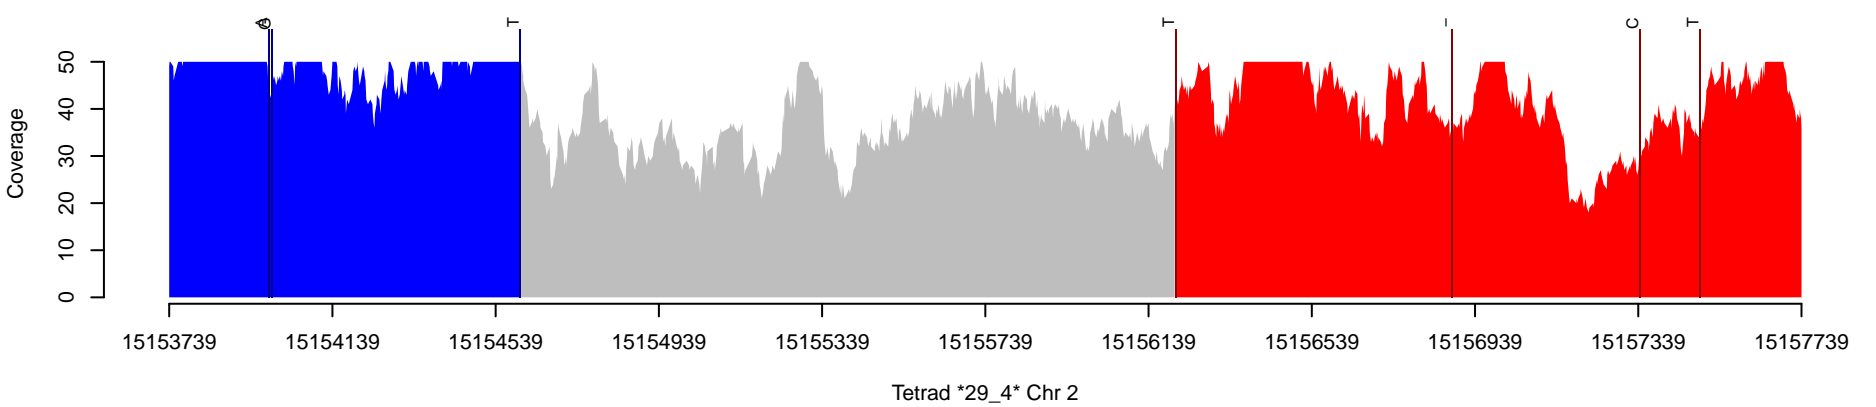

# ID6

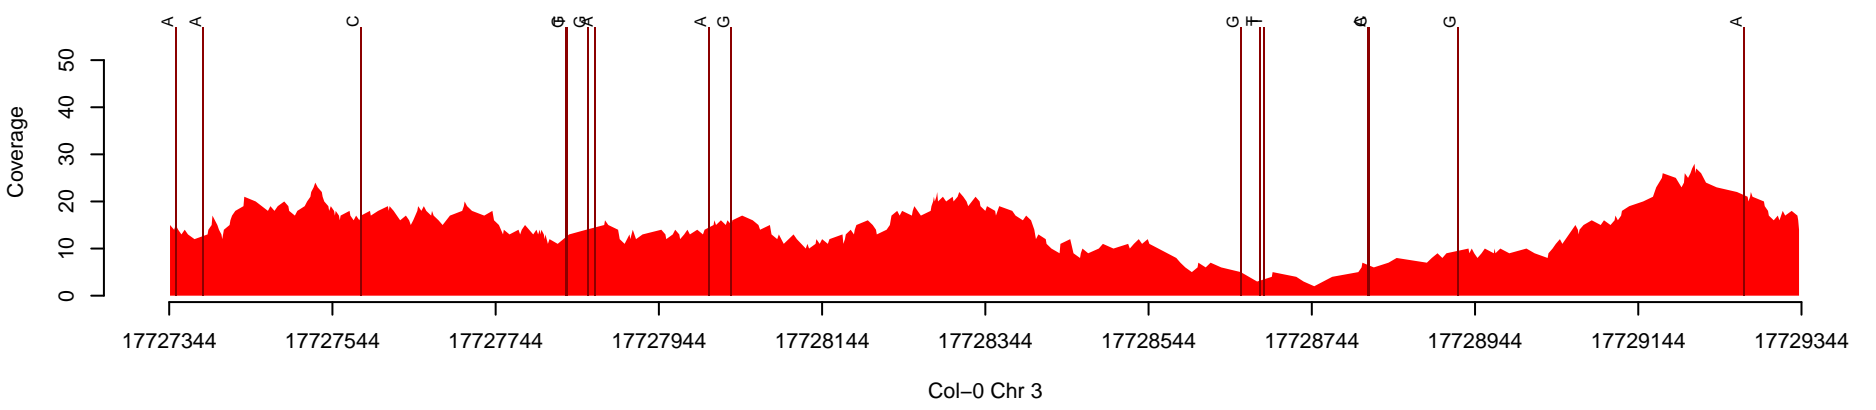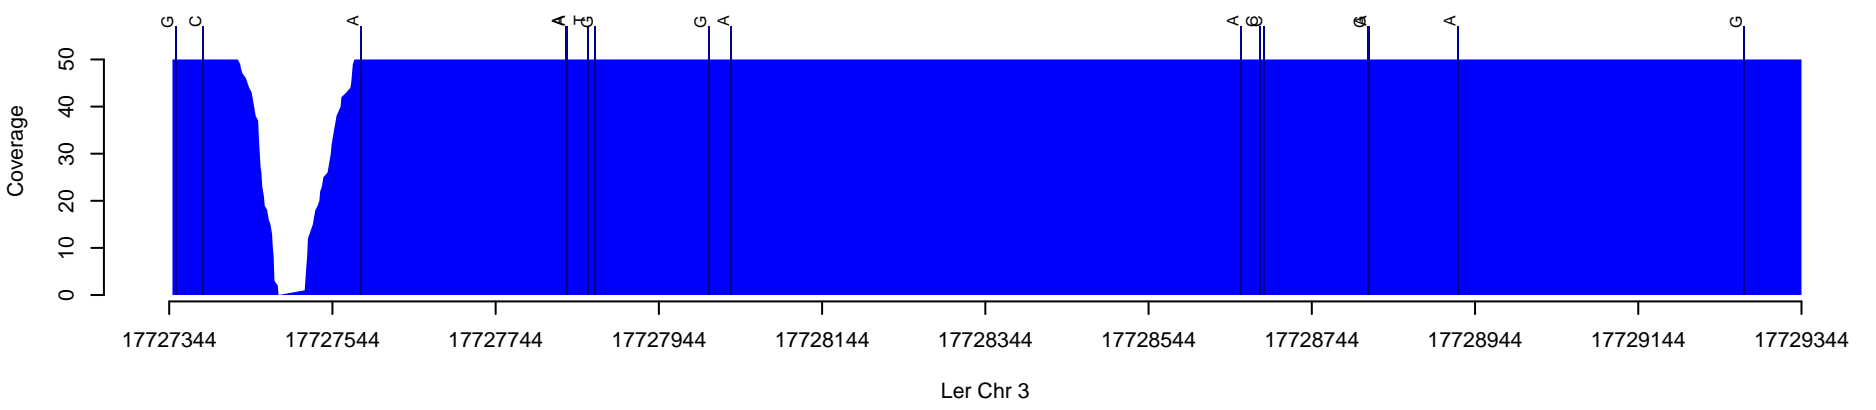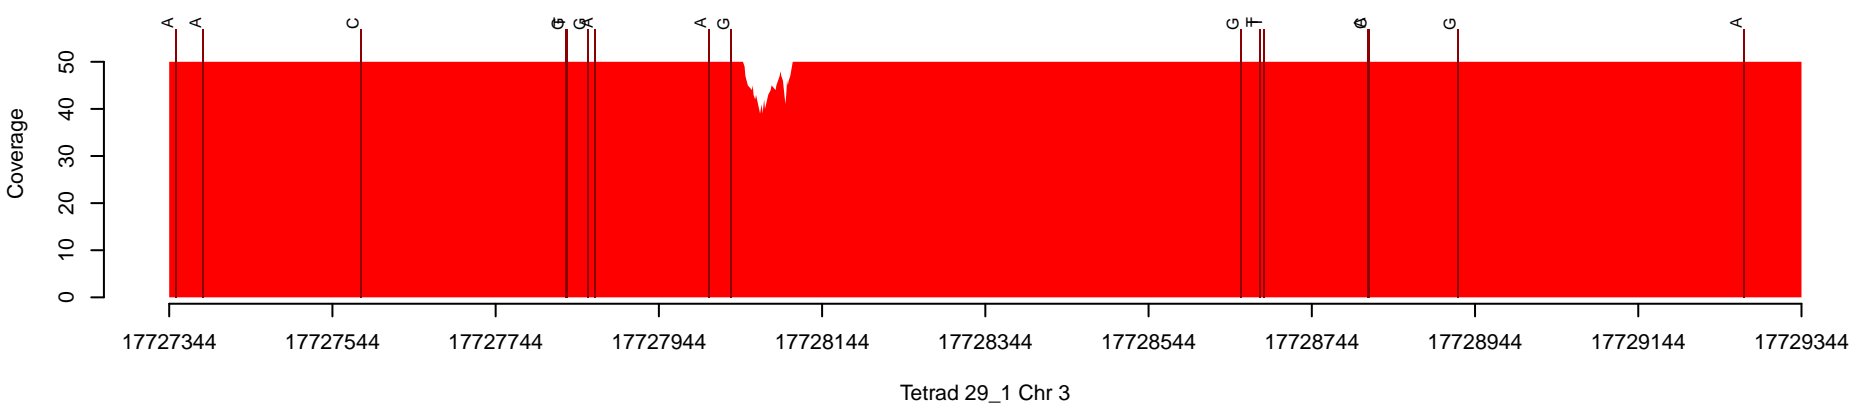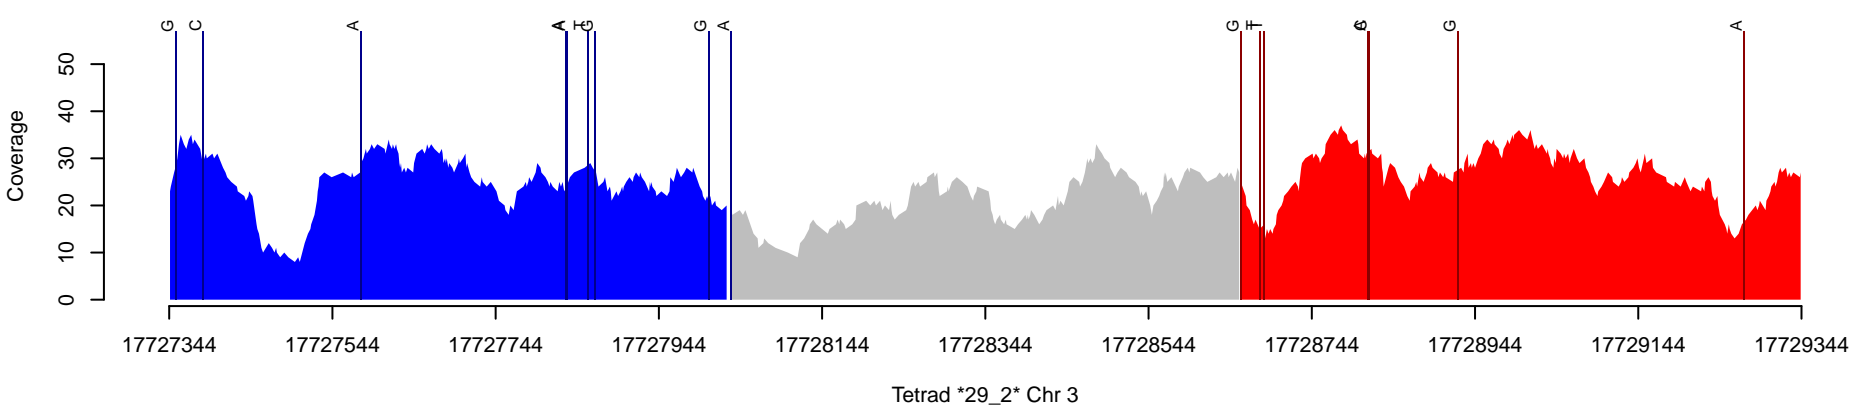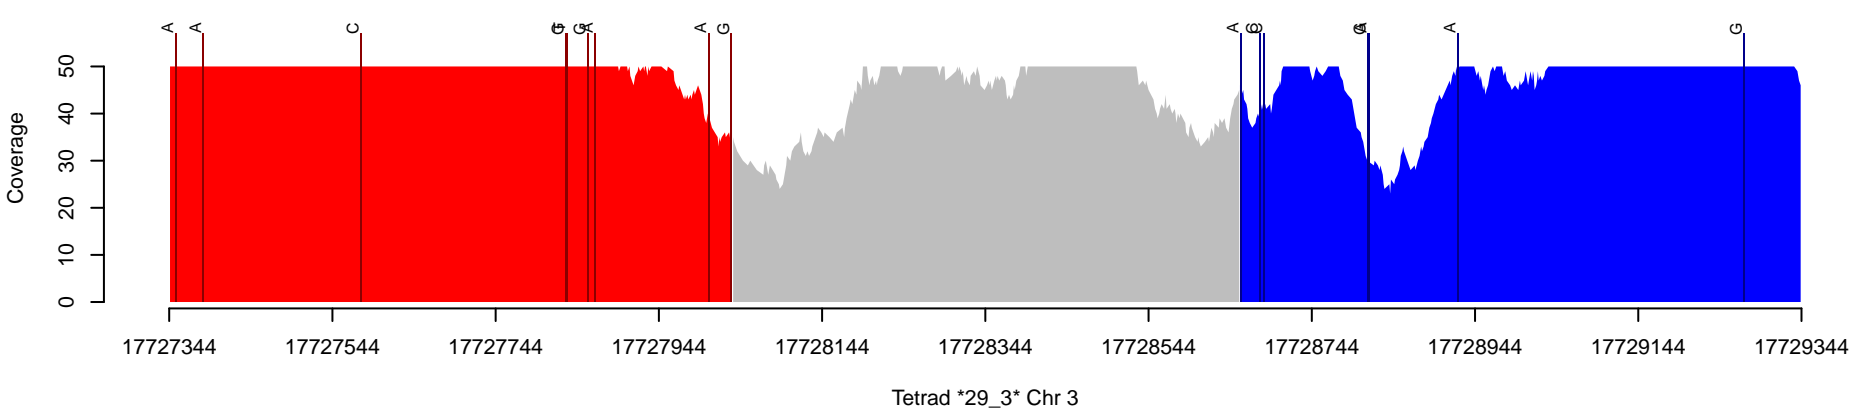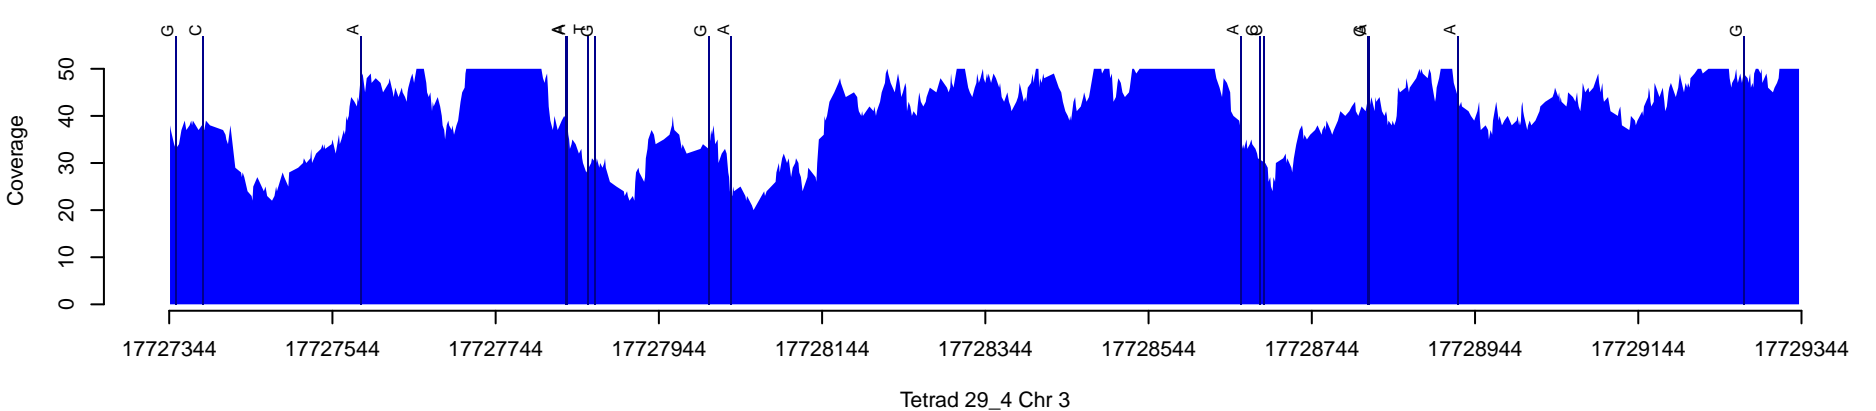

# ID7

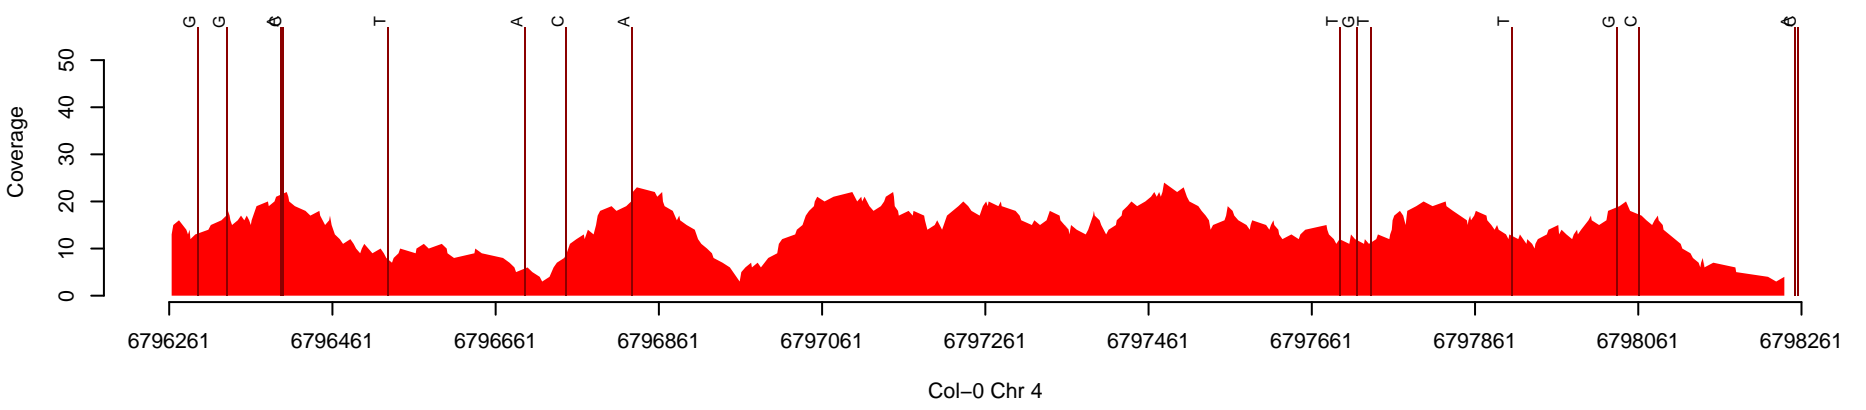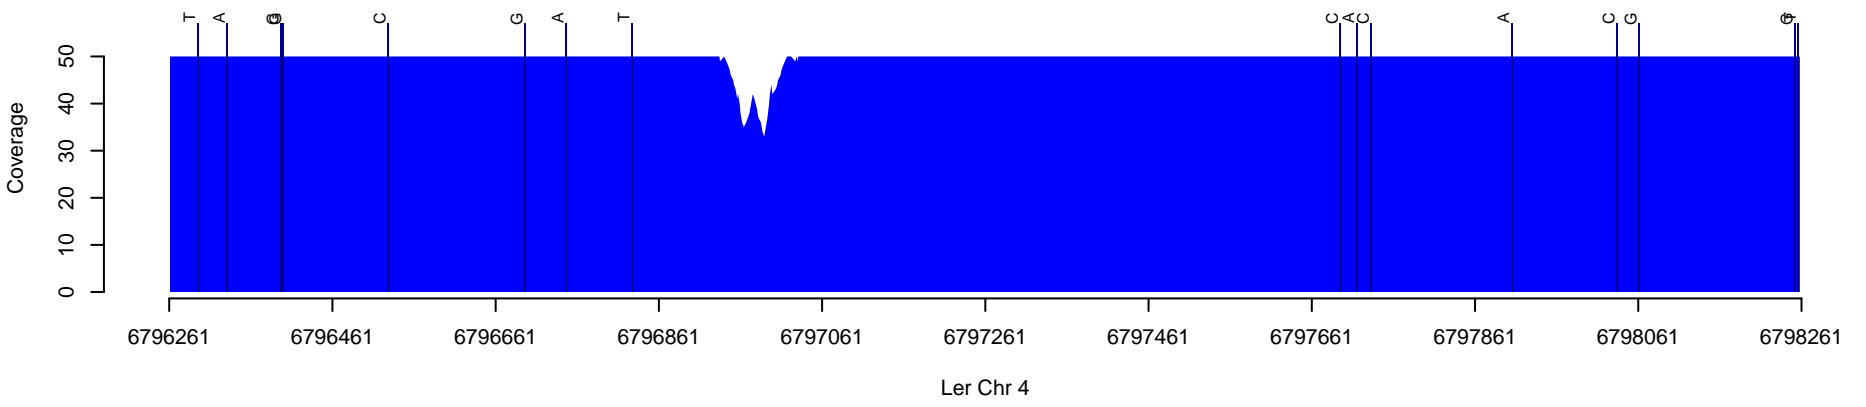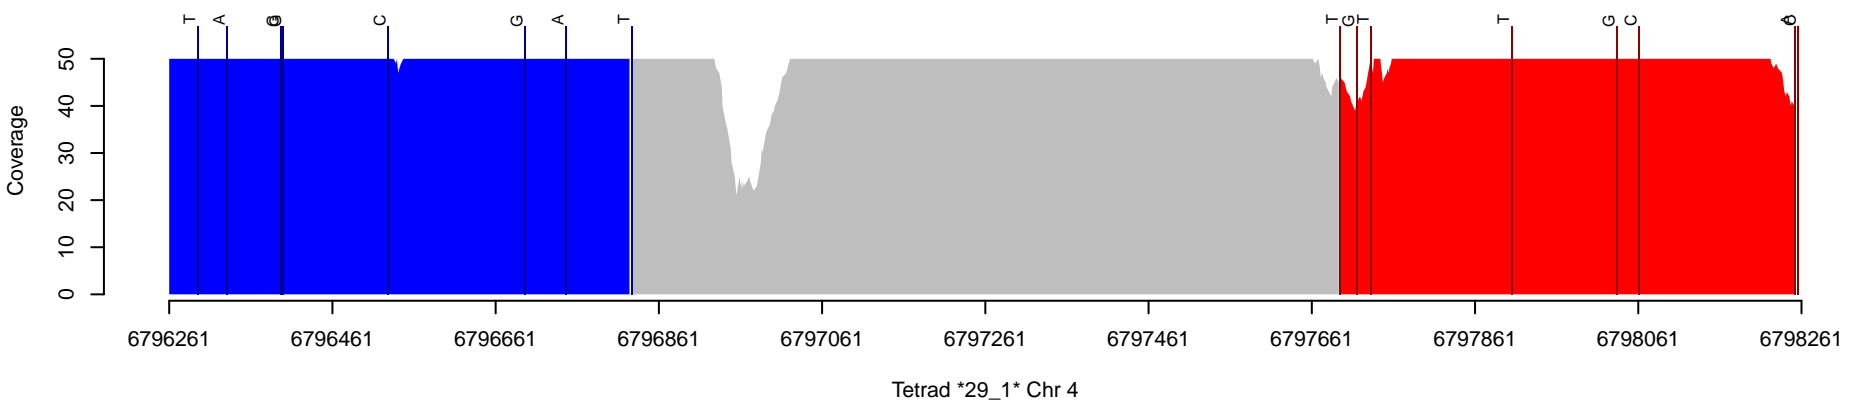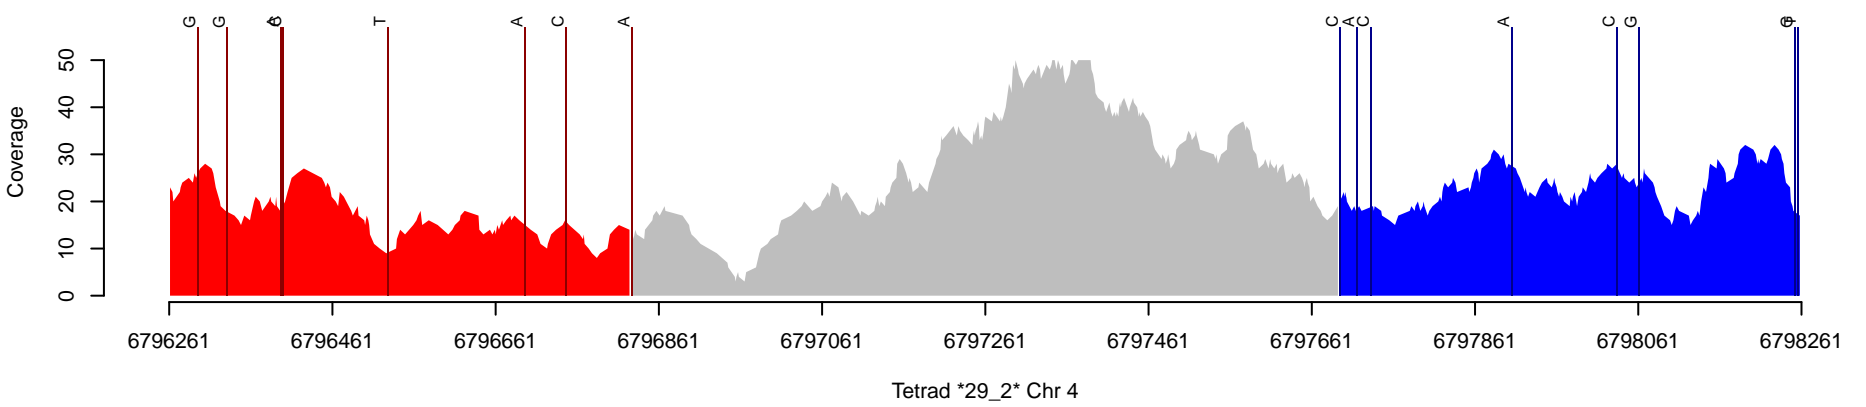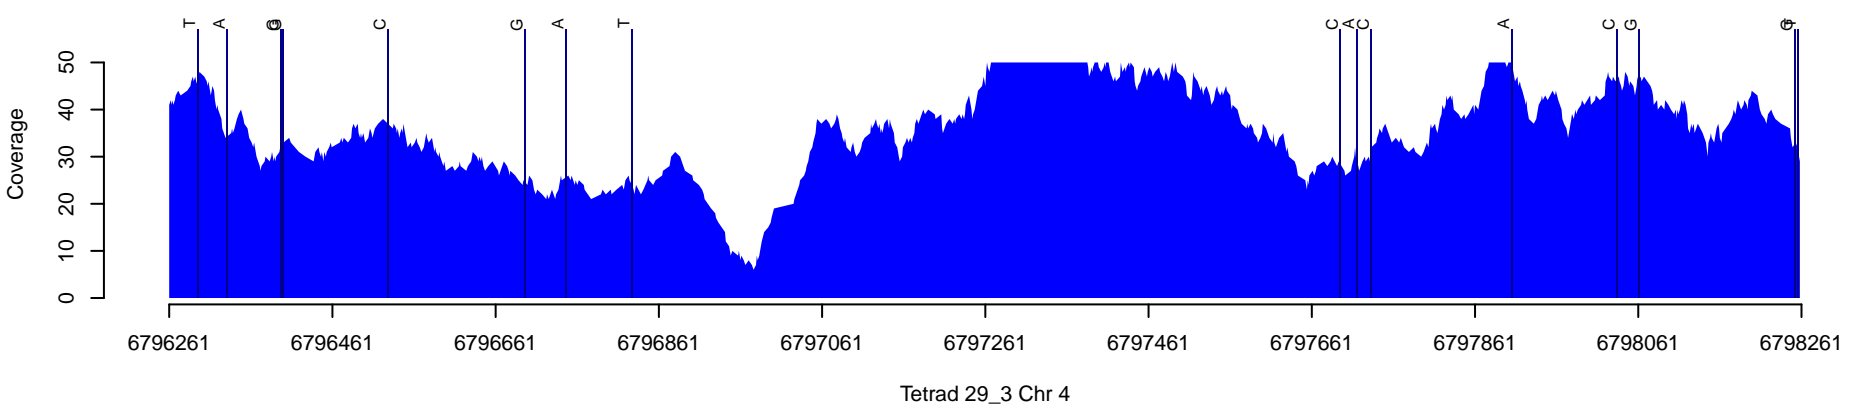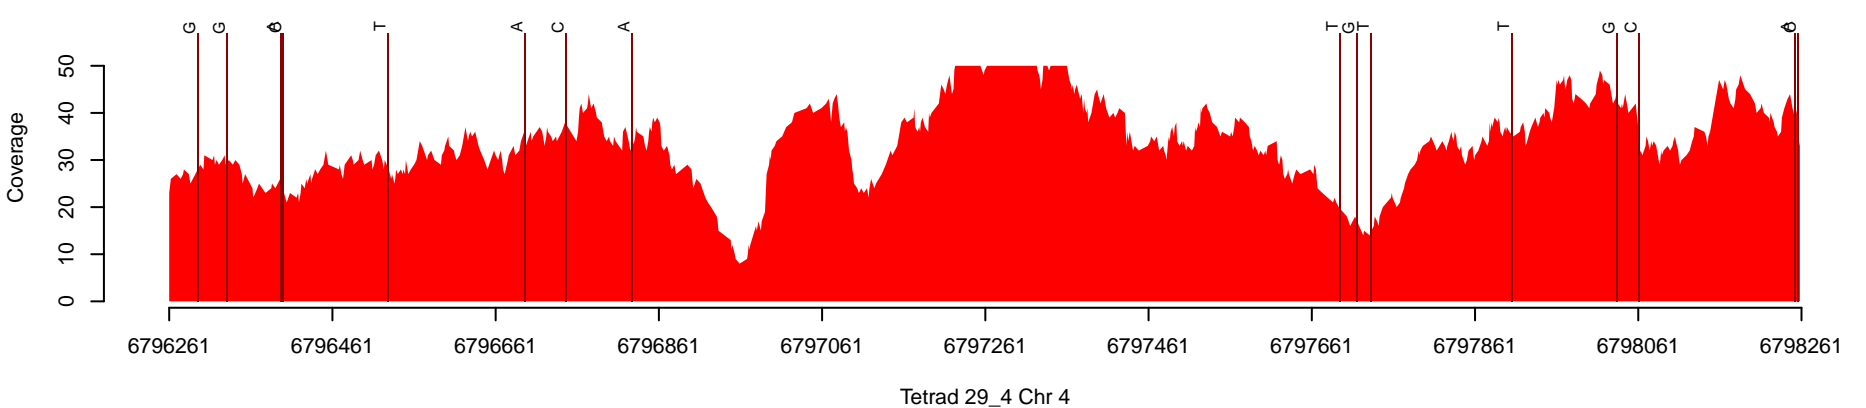

# ID8

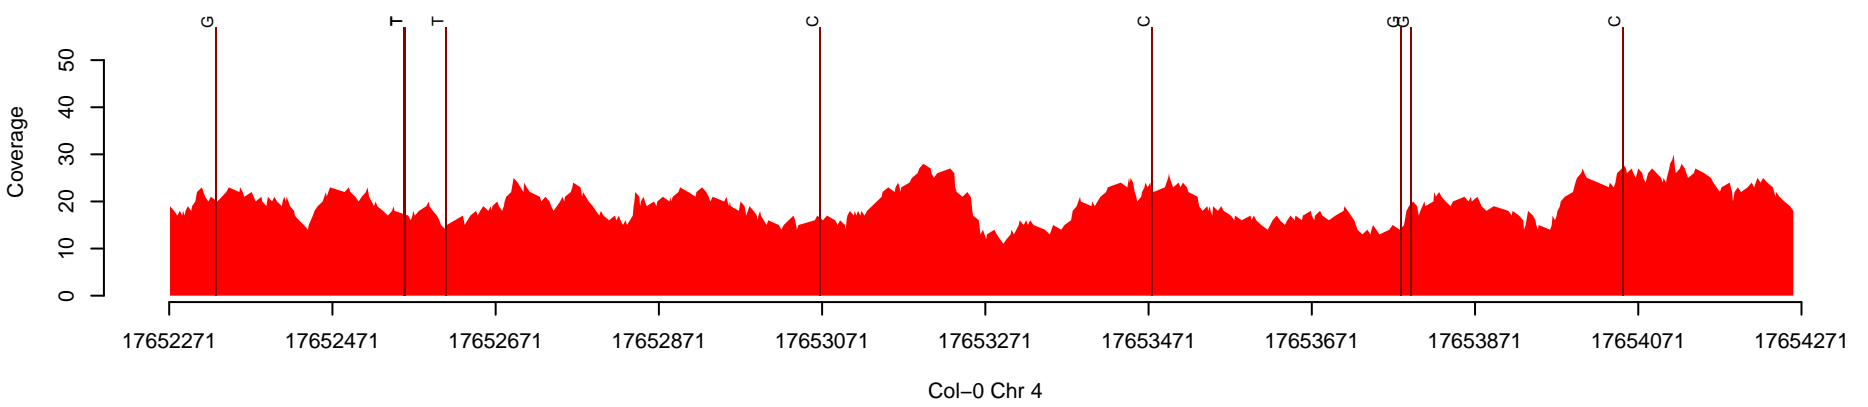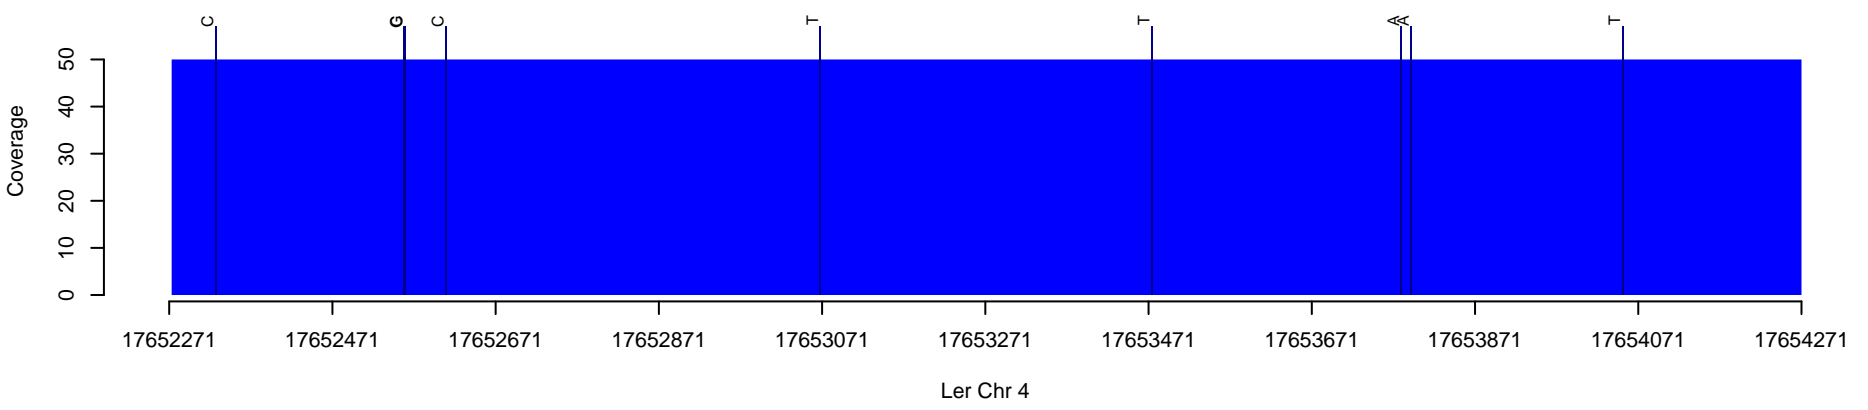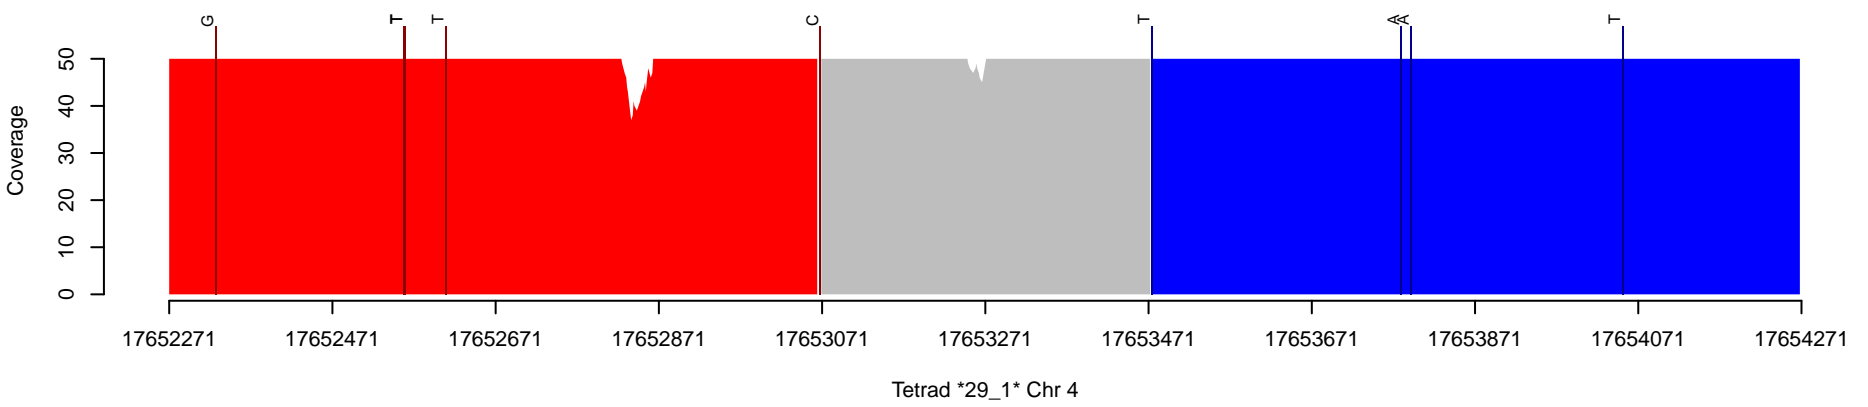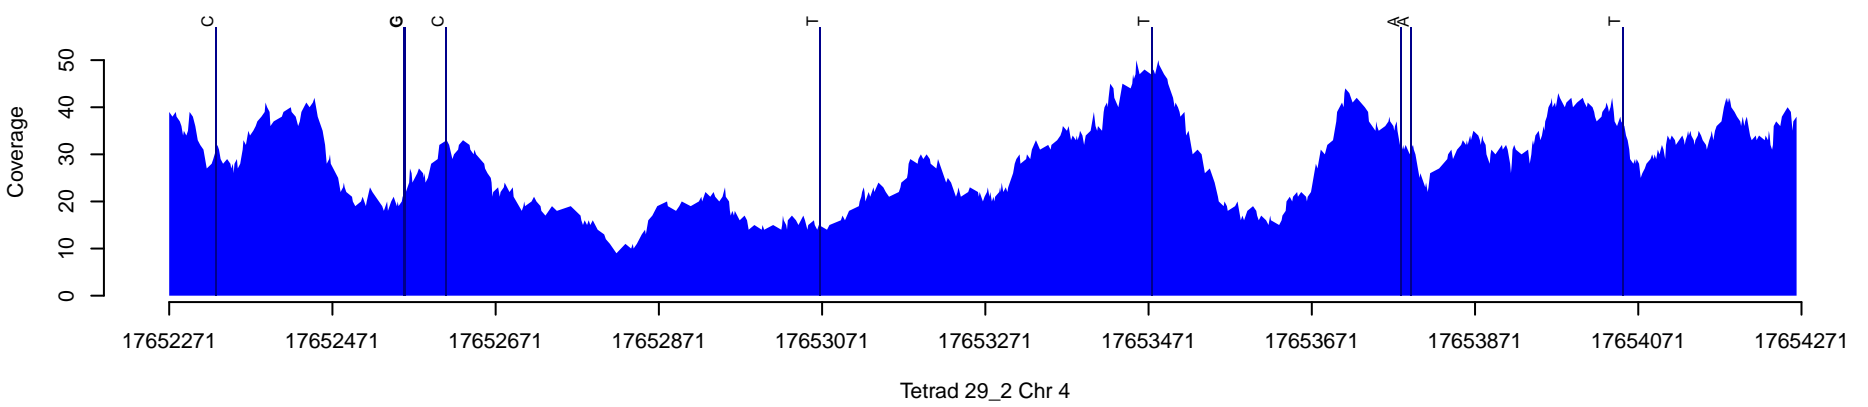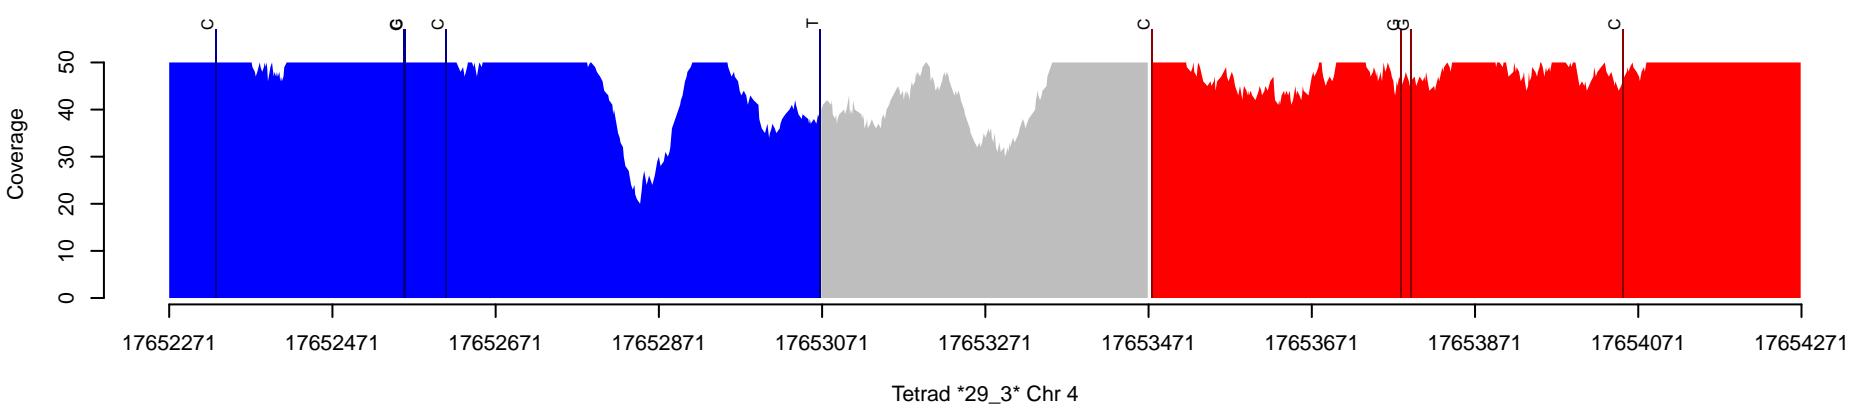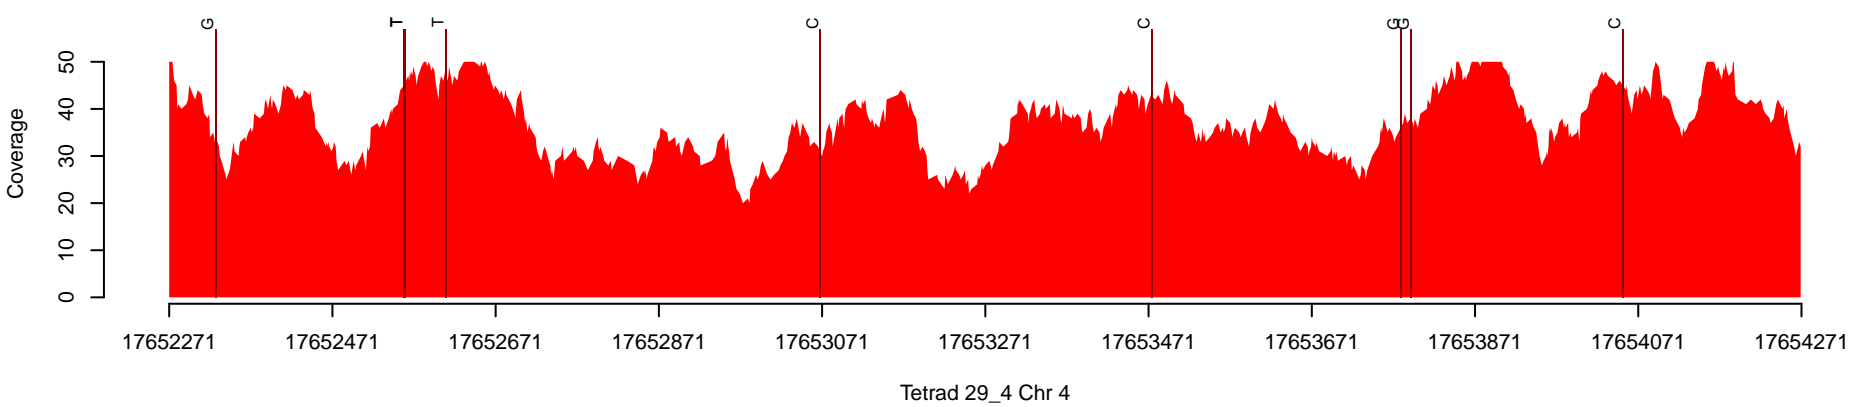



### ID9

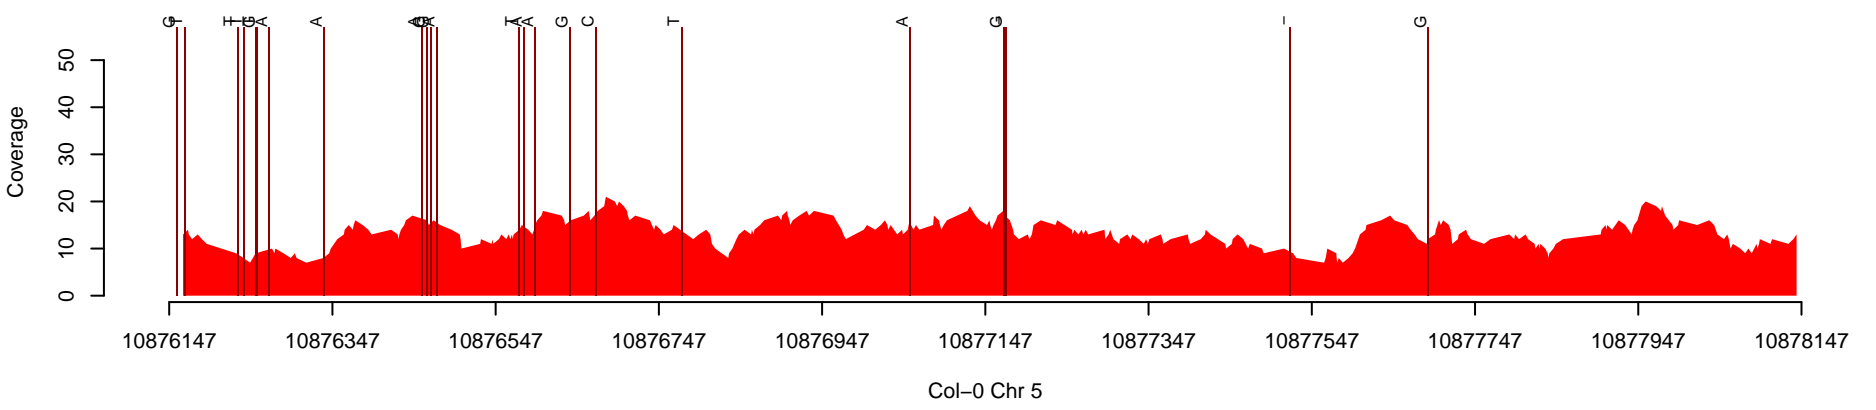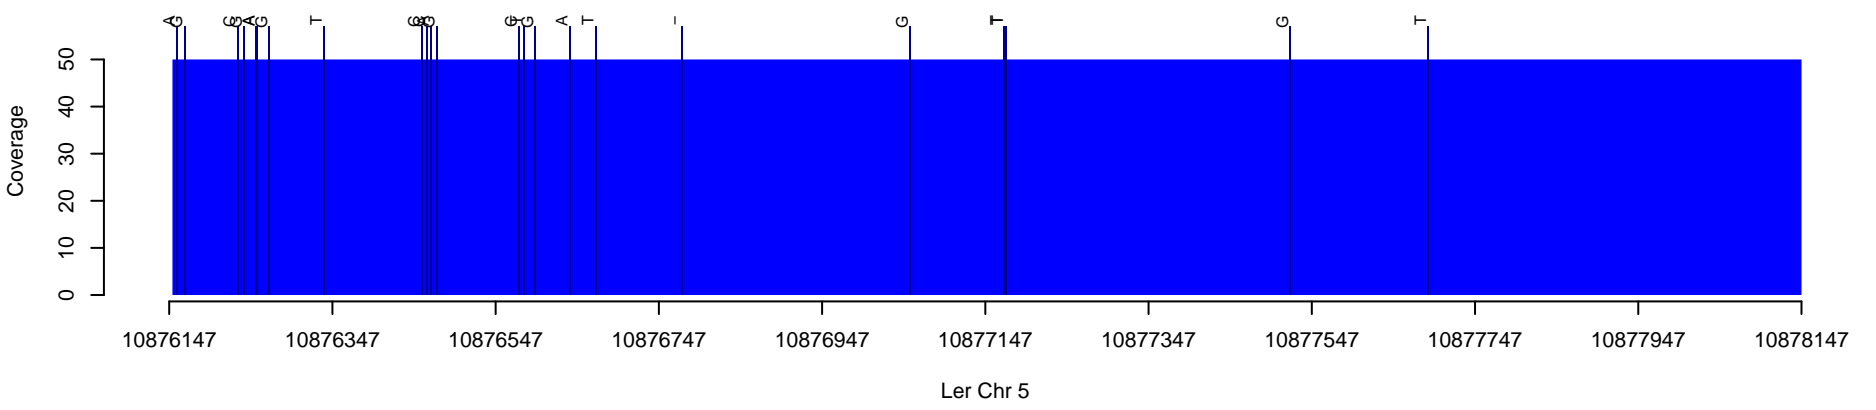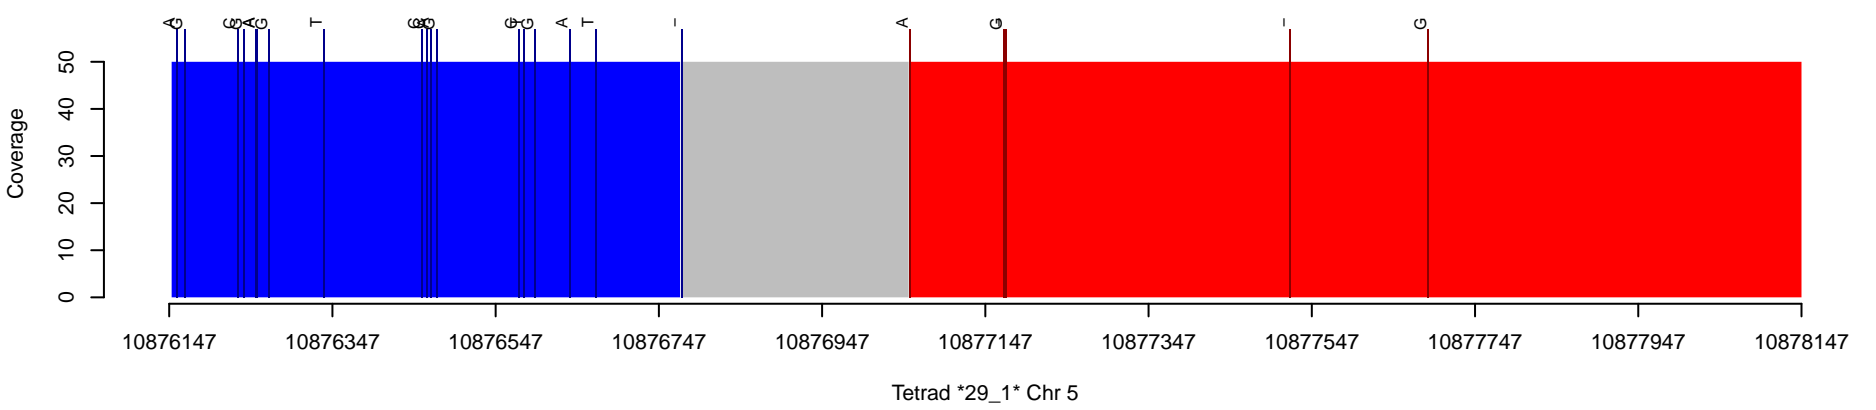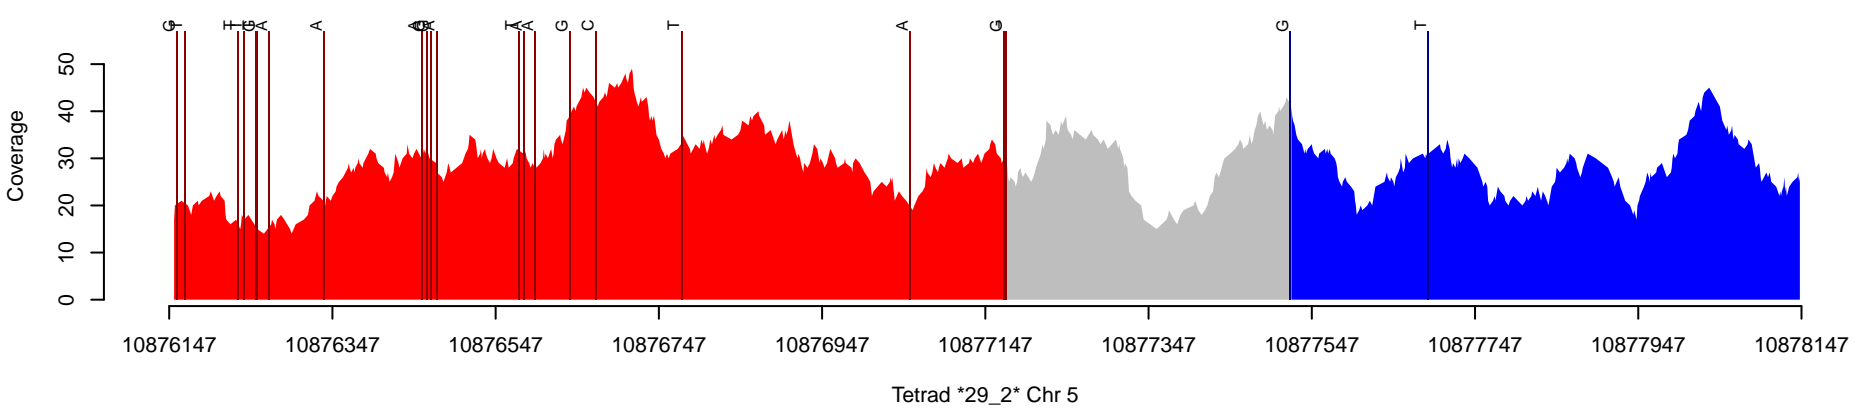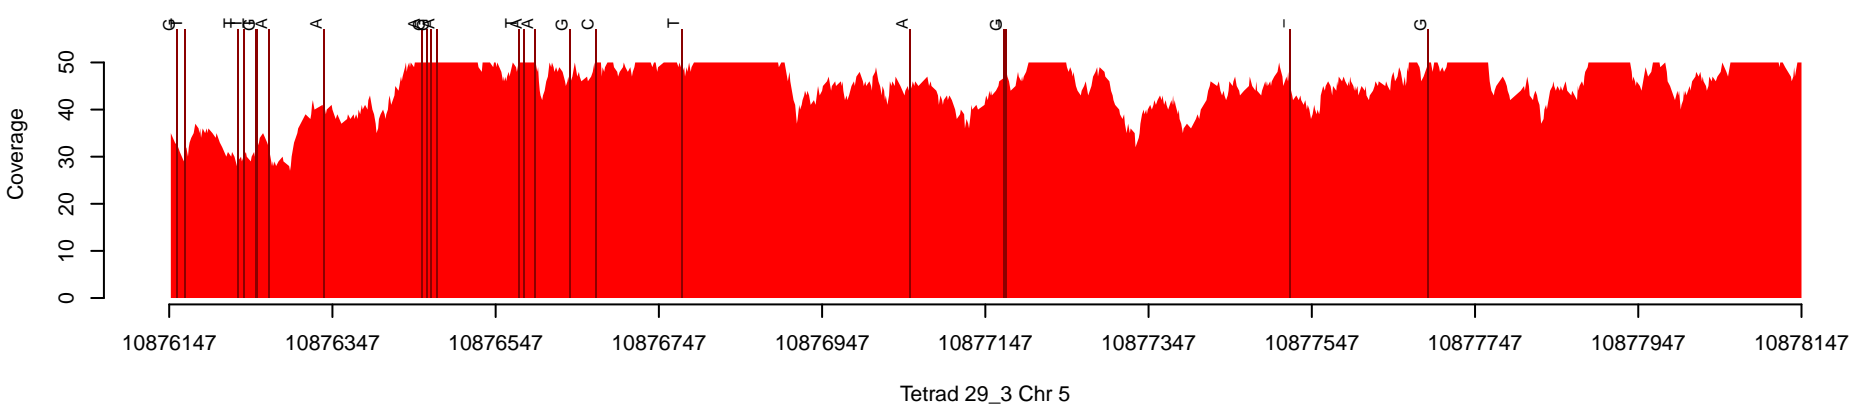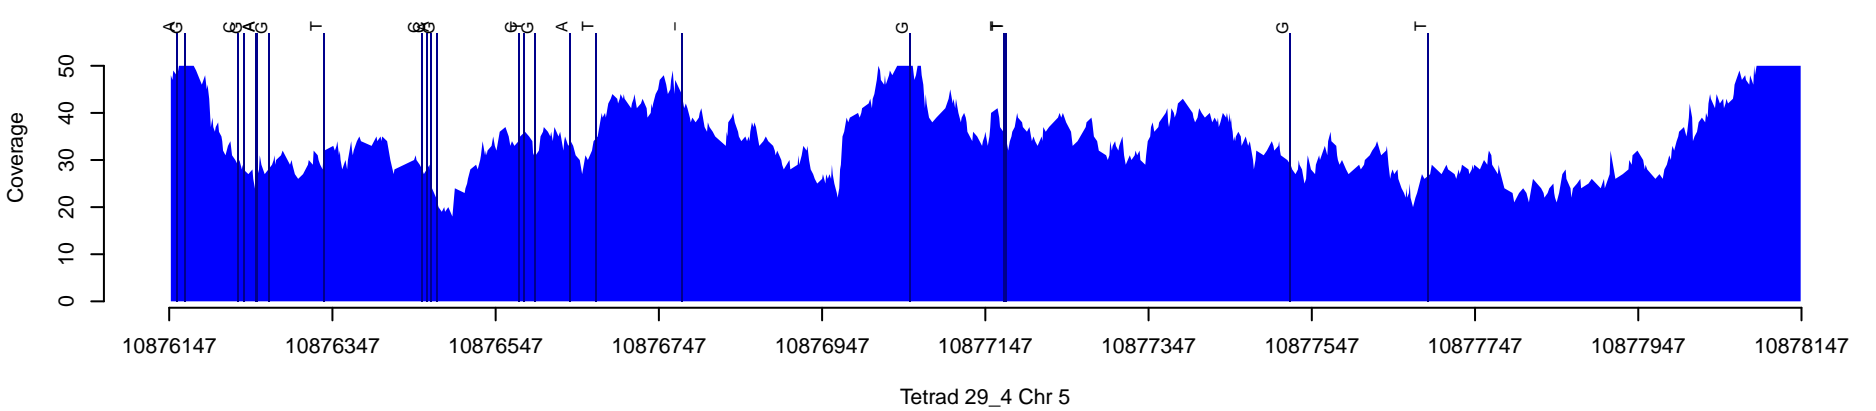

# ID10

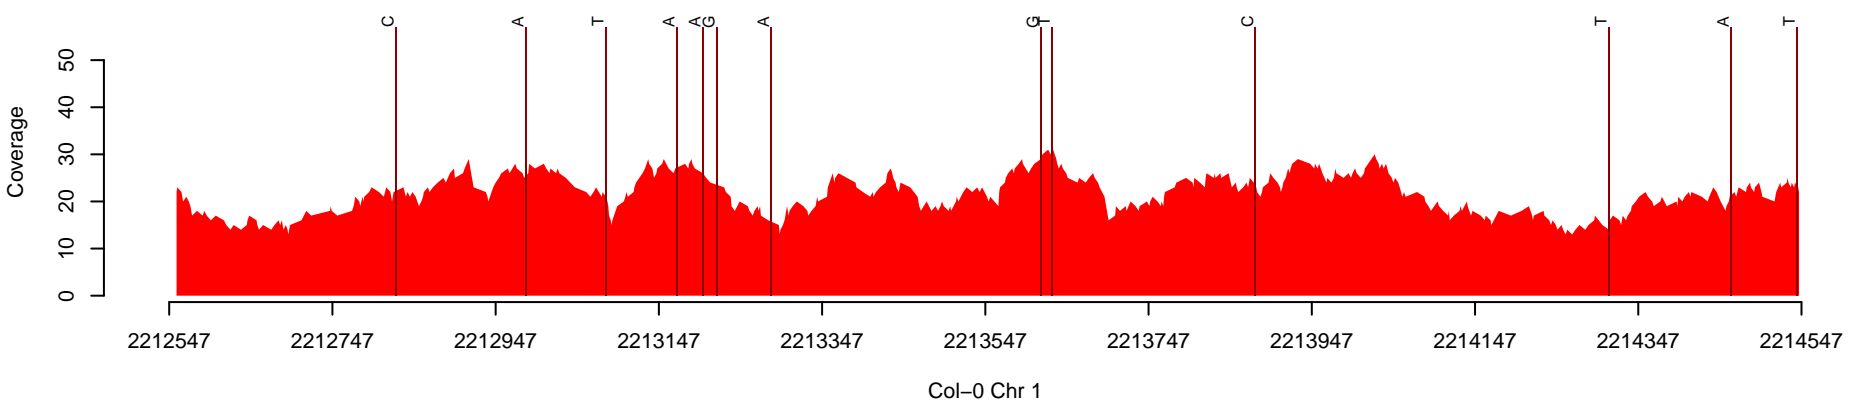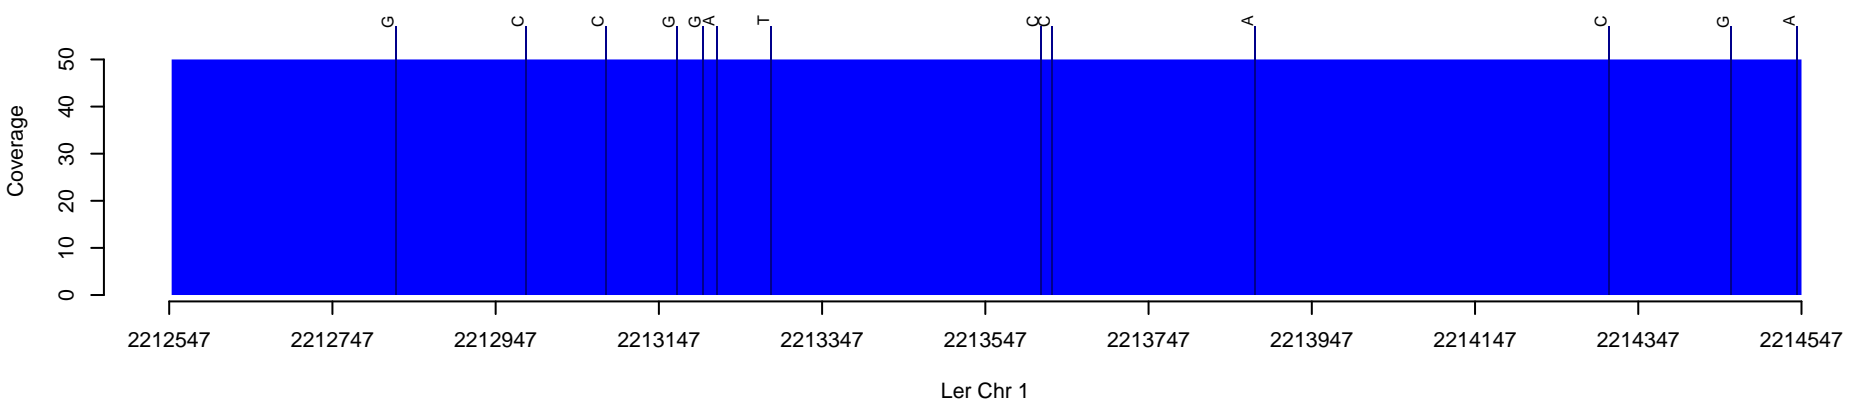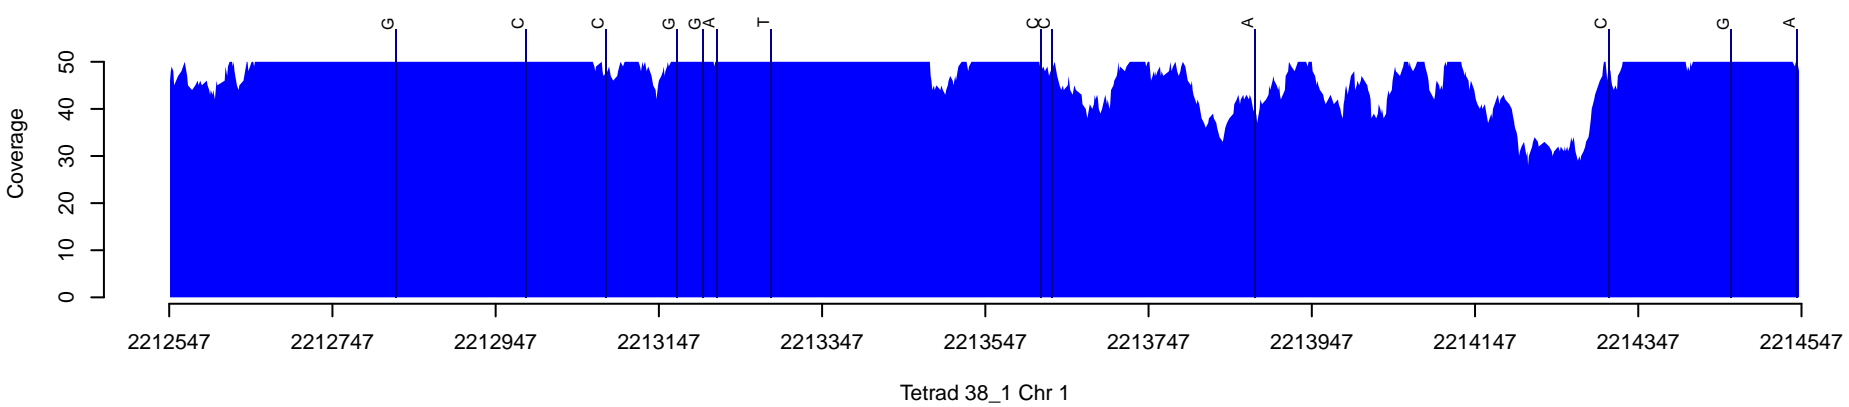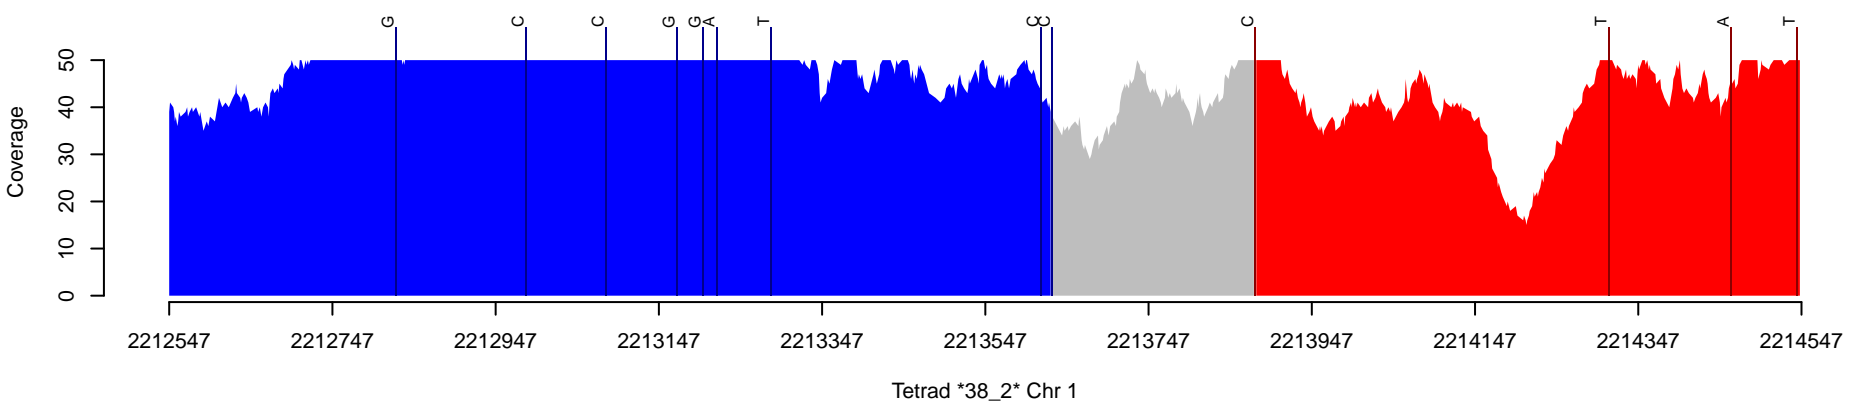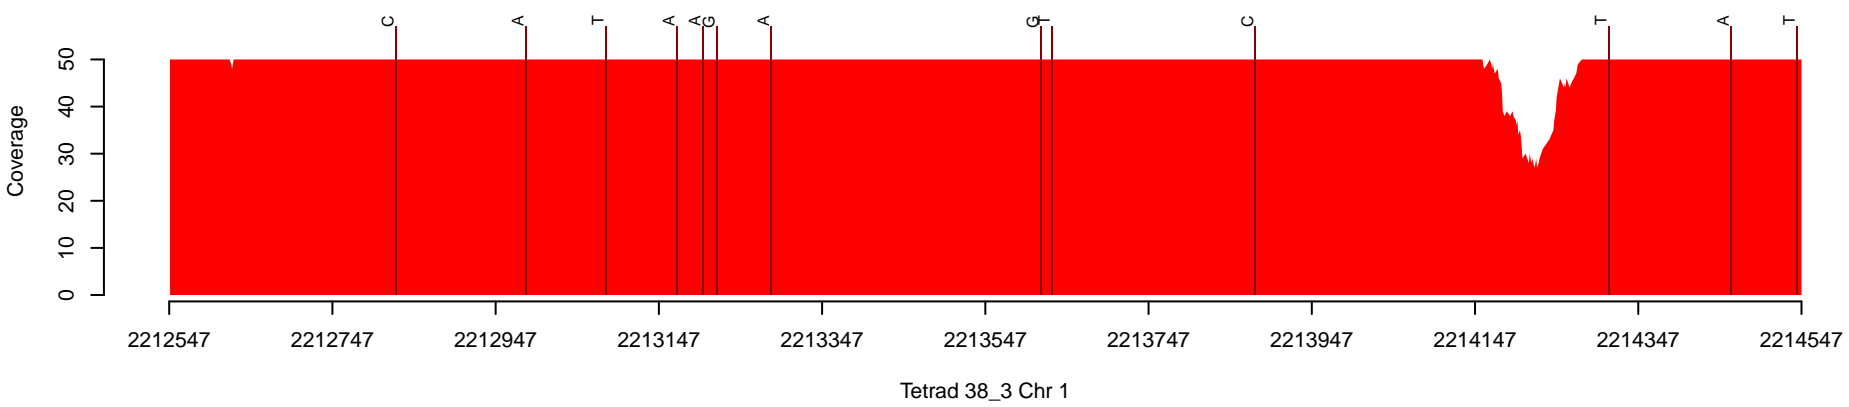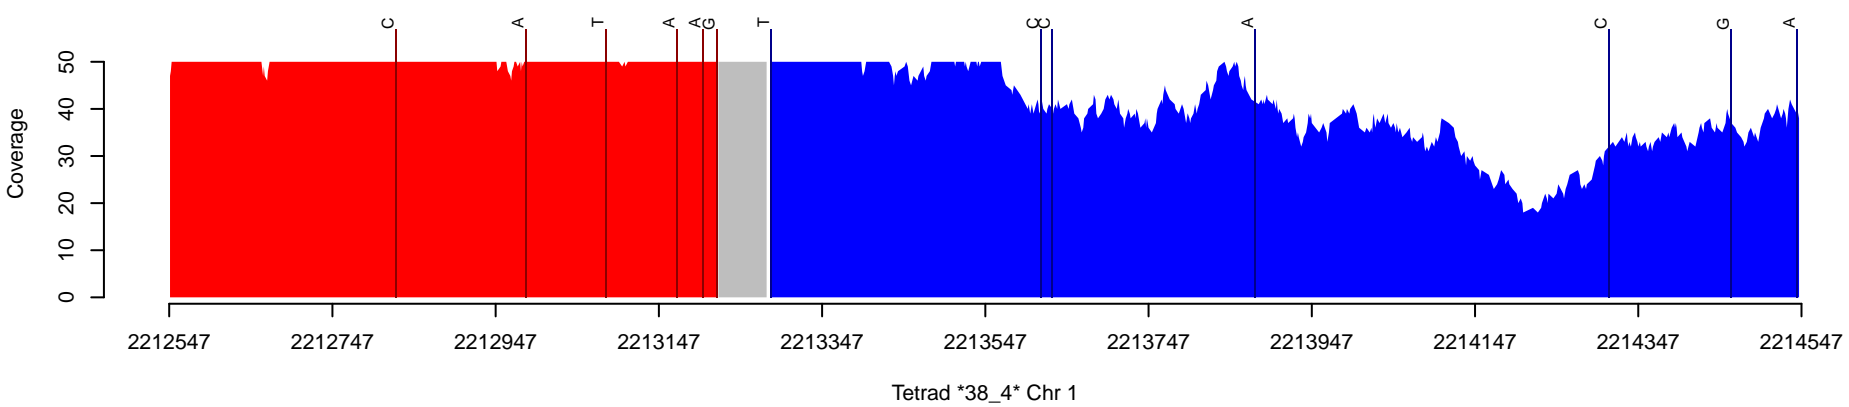

# ID11

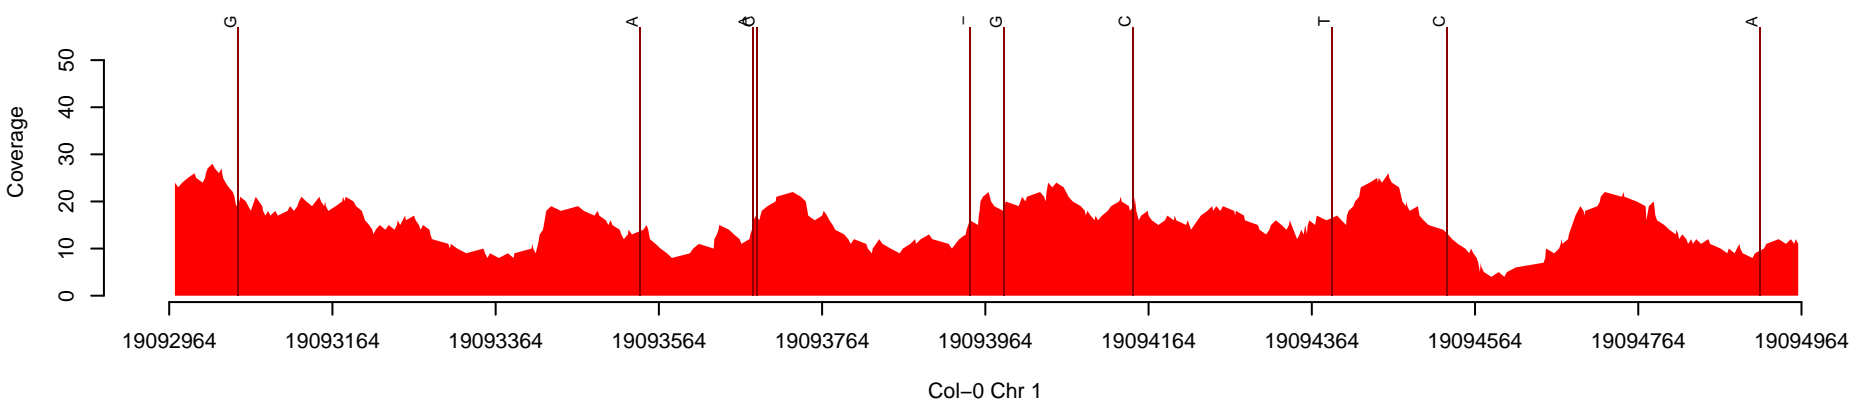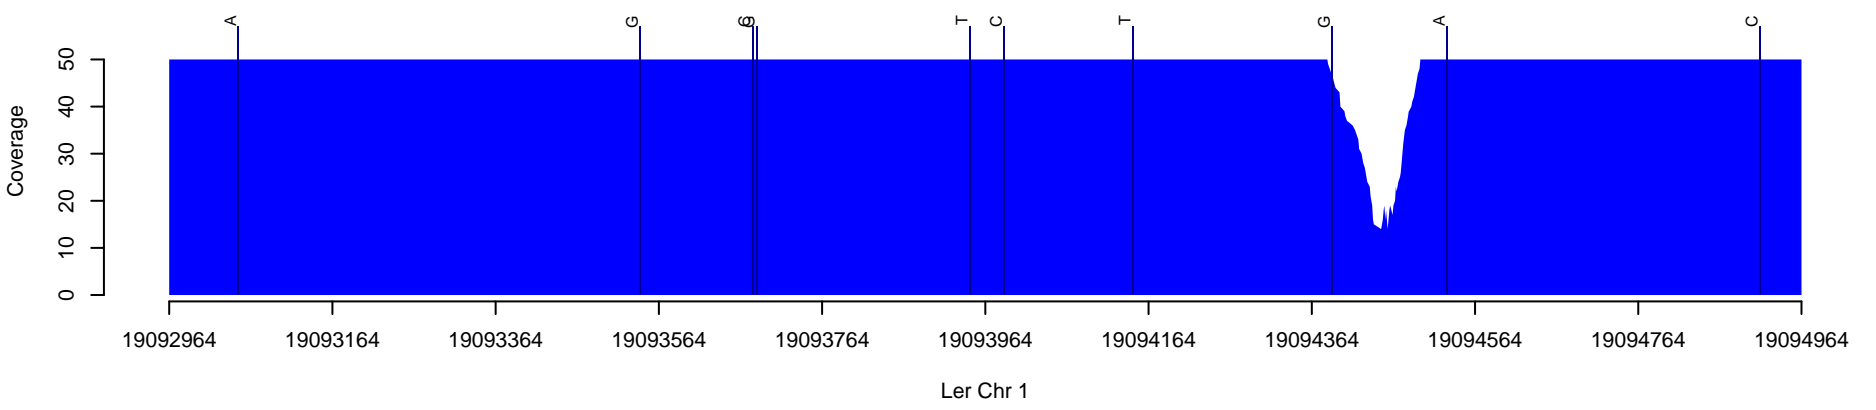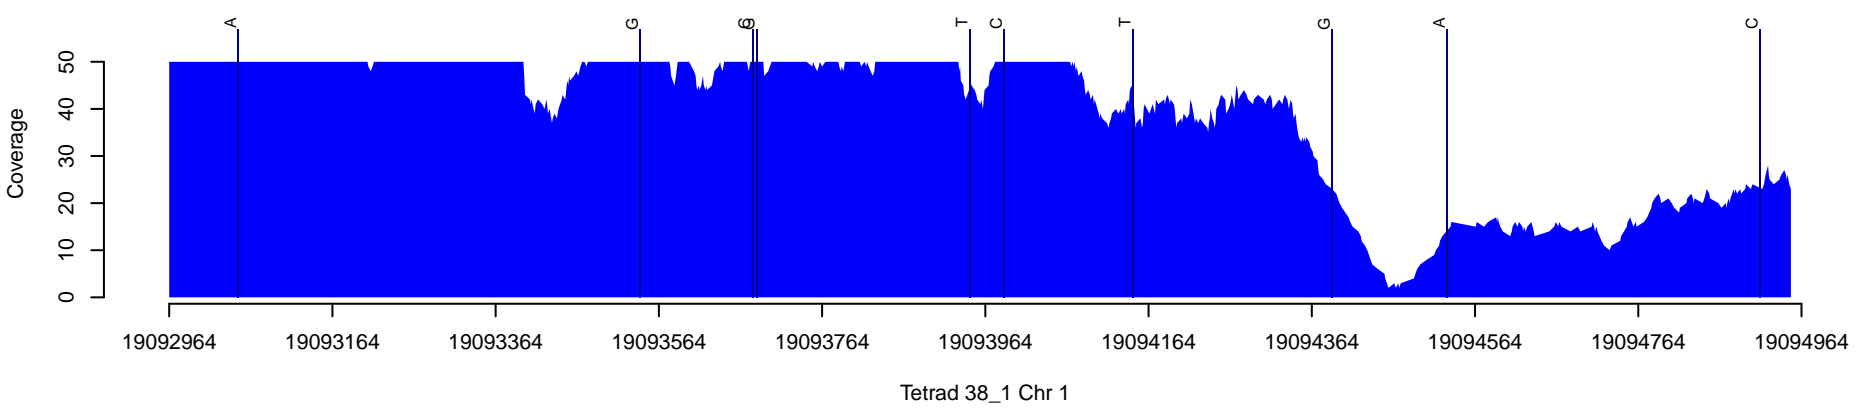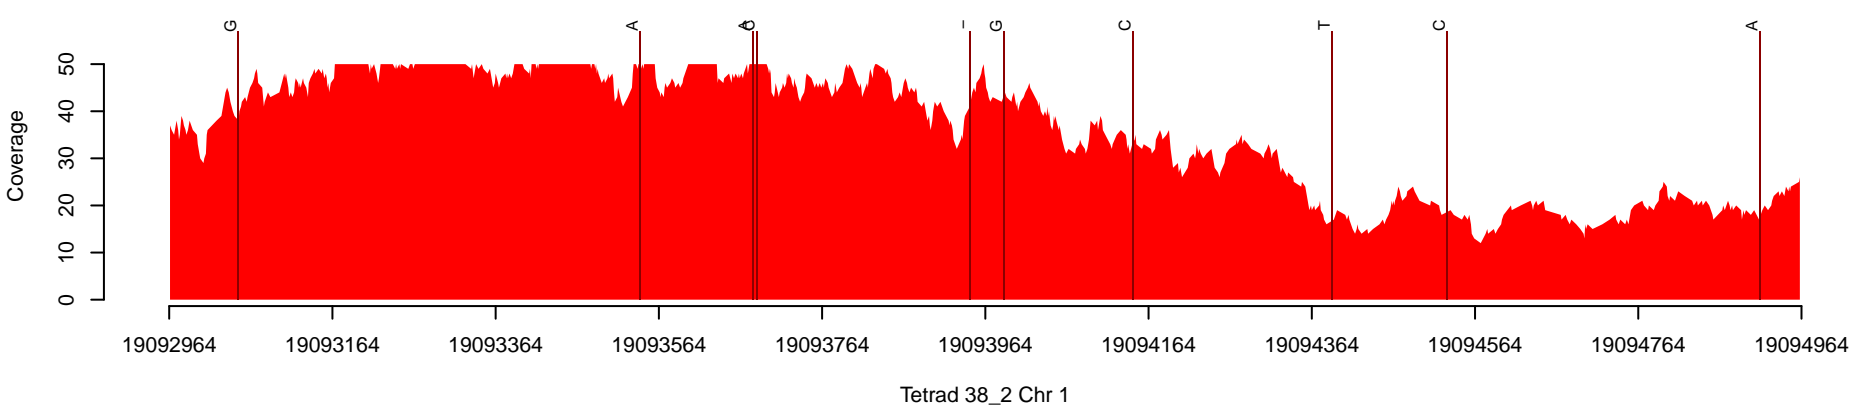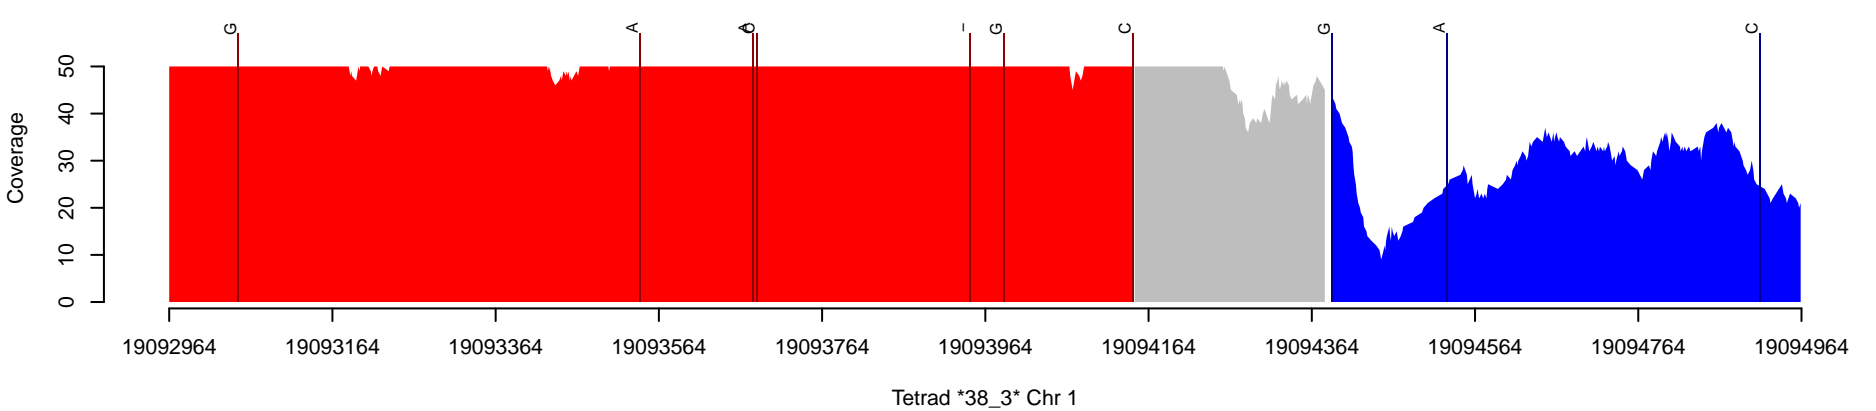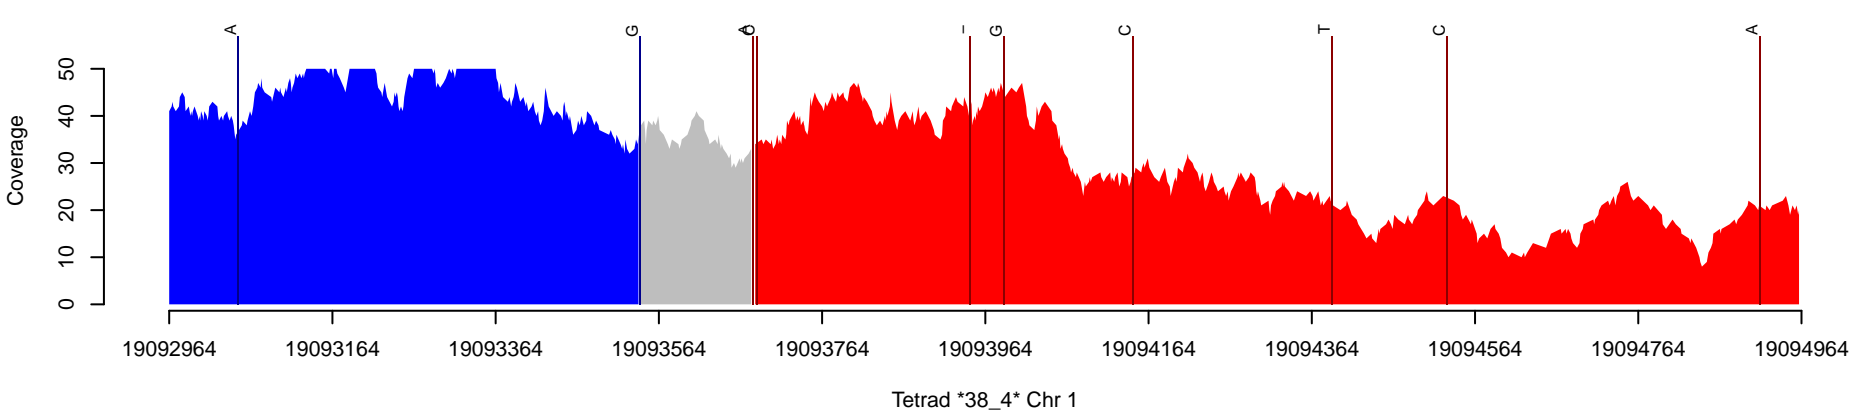

# ID12

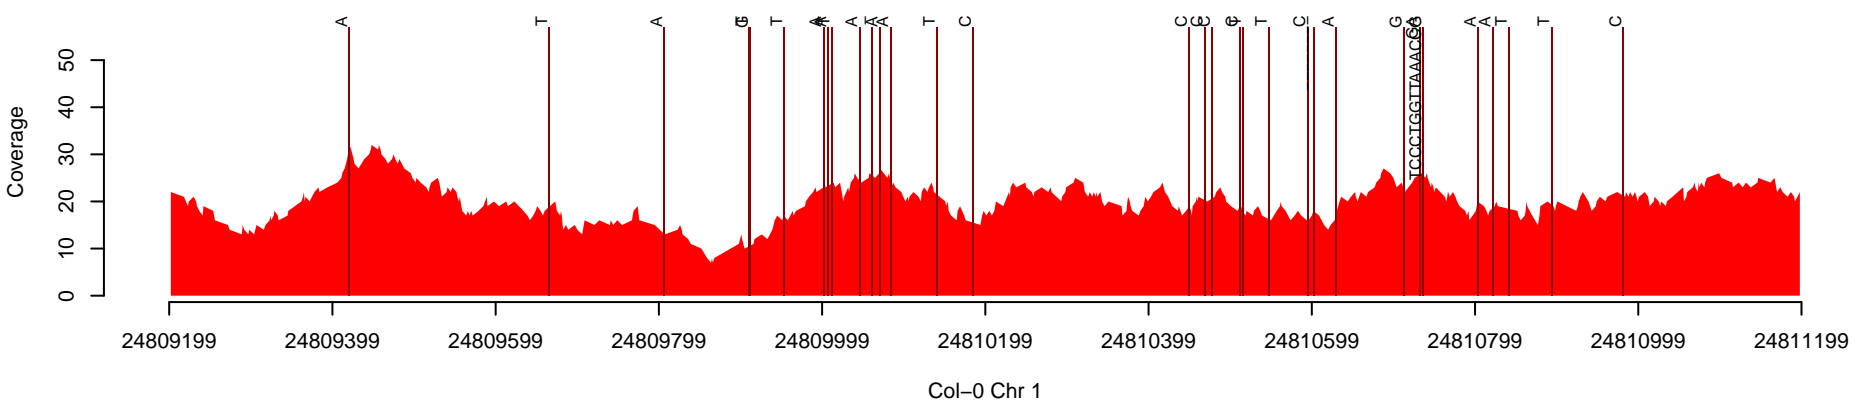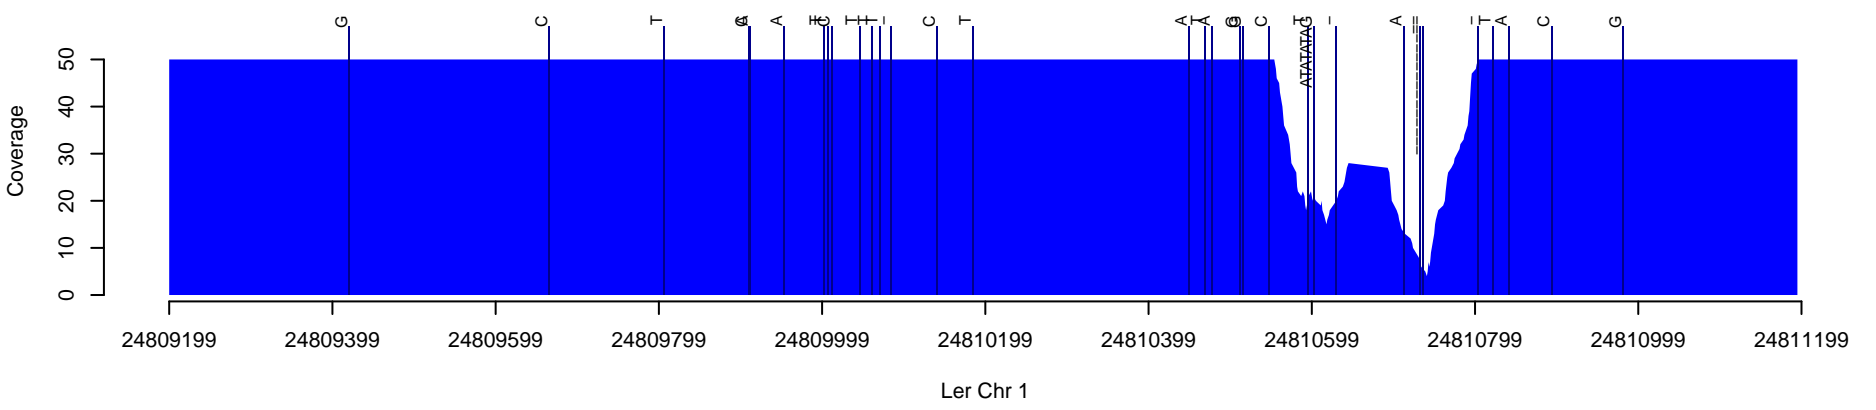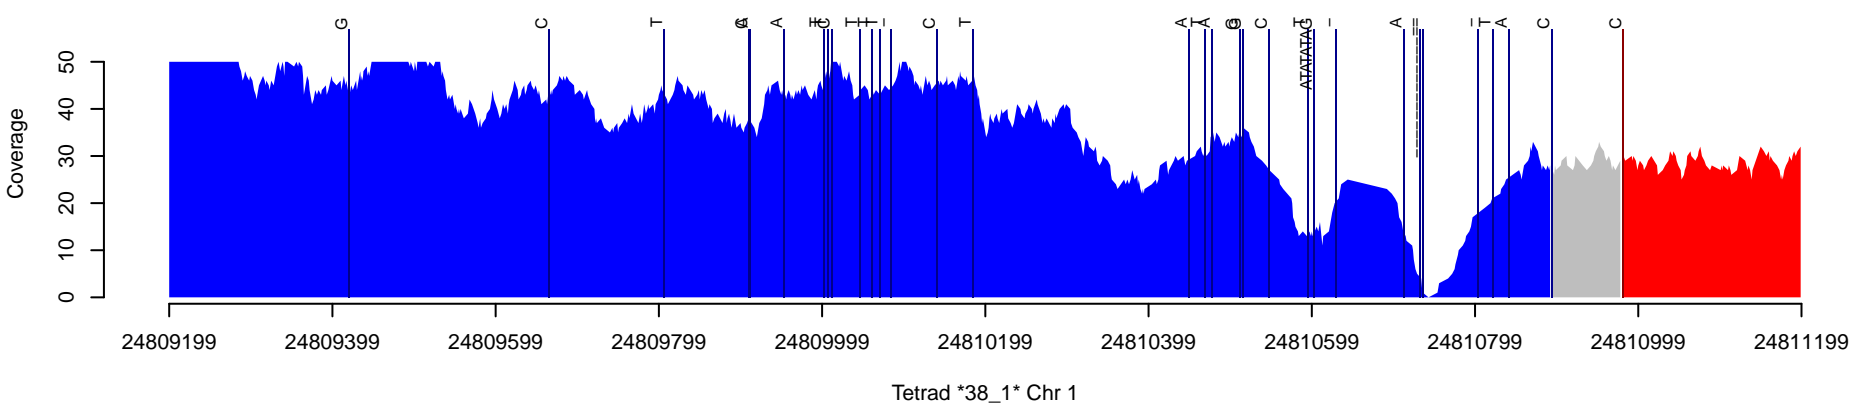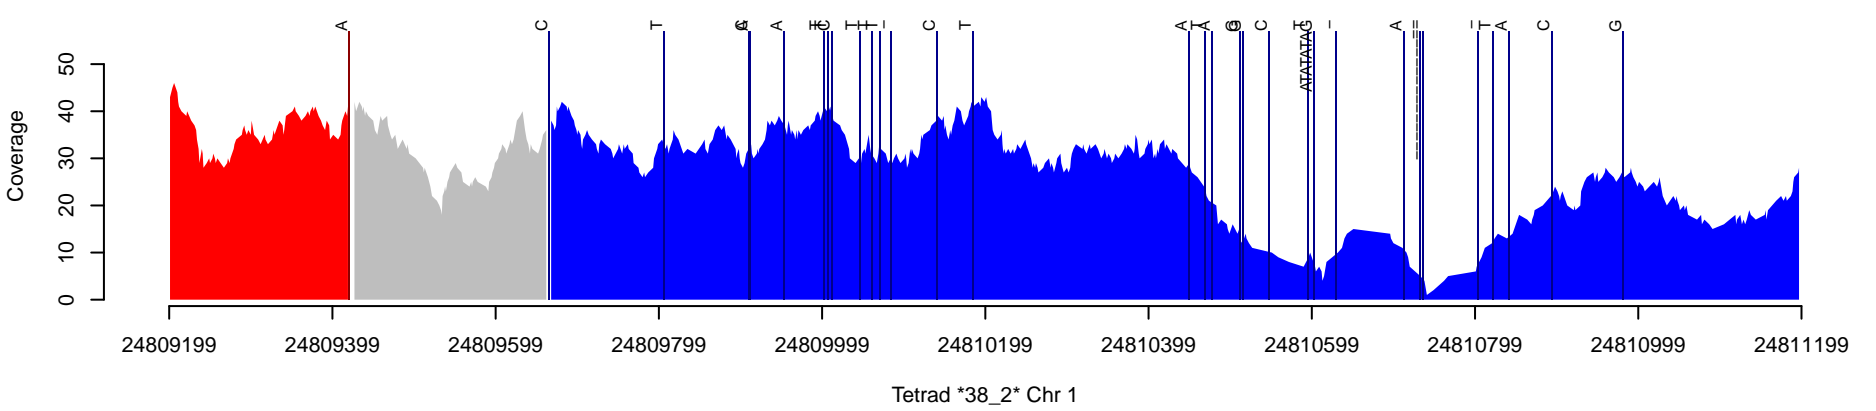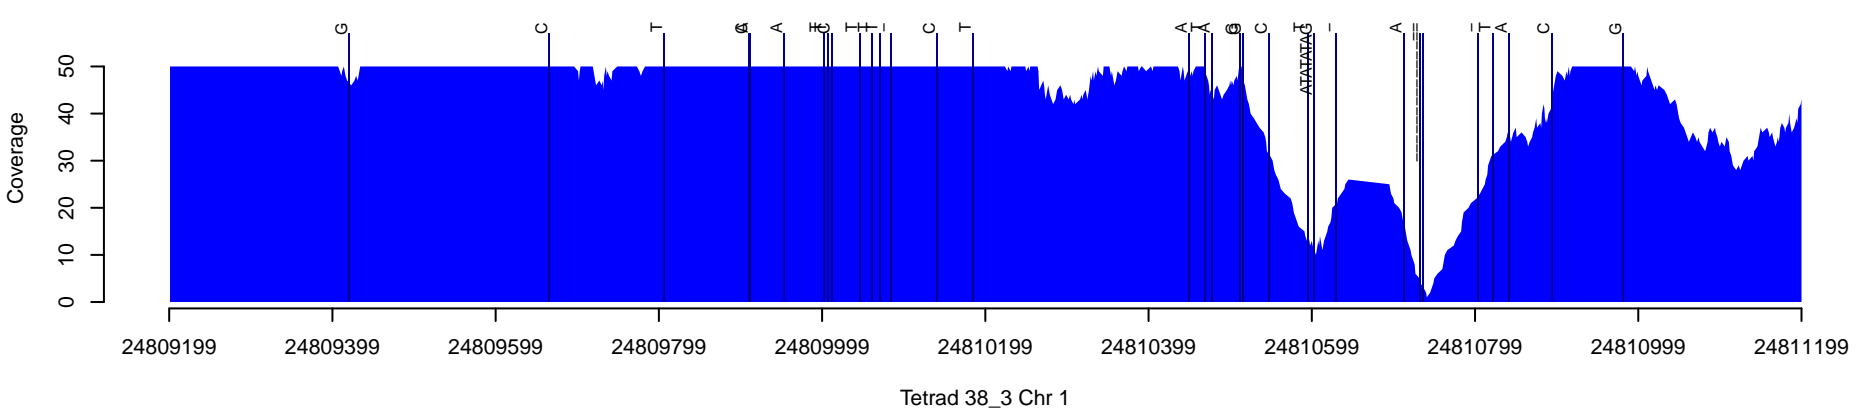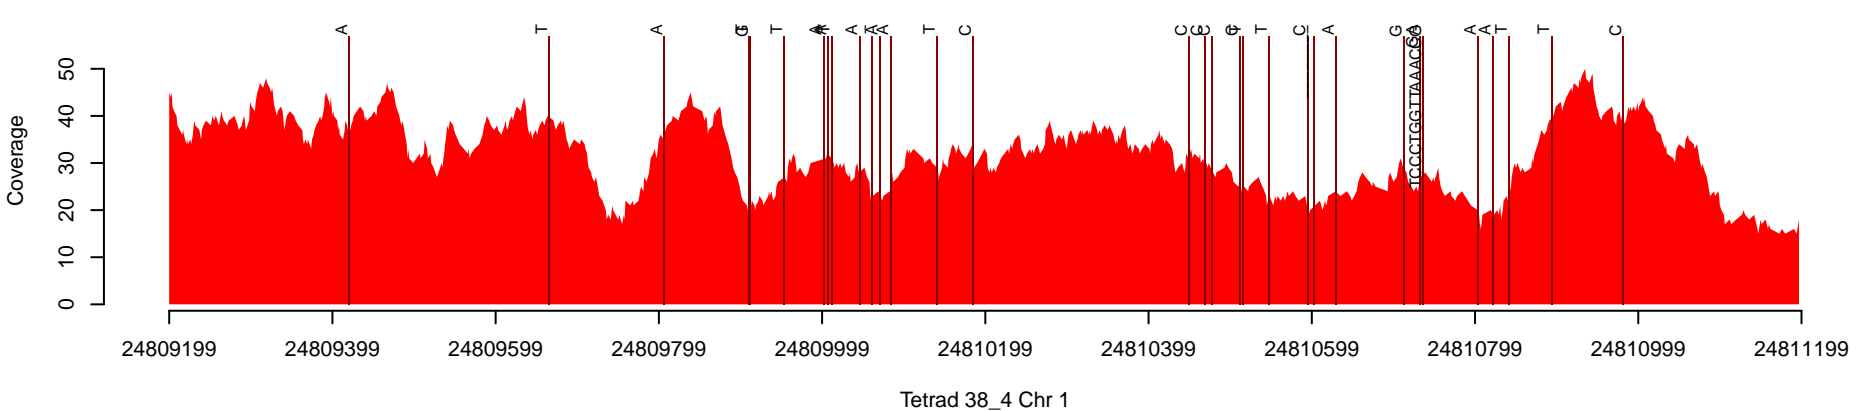

# ID13

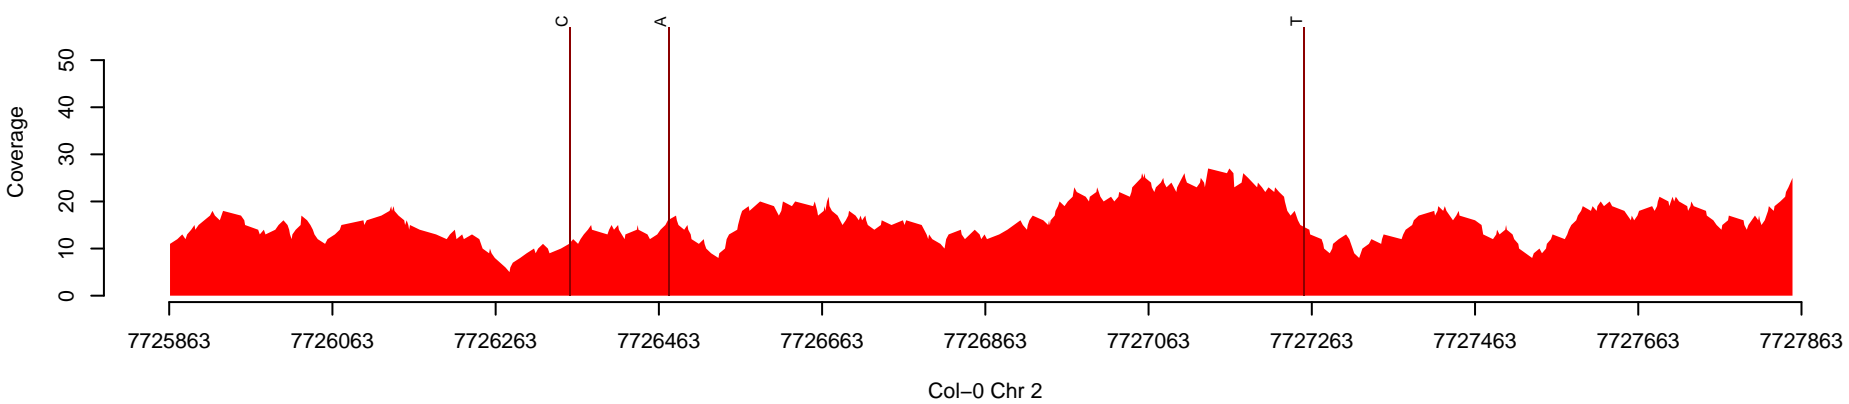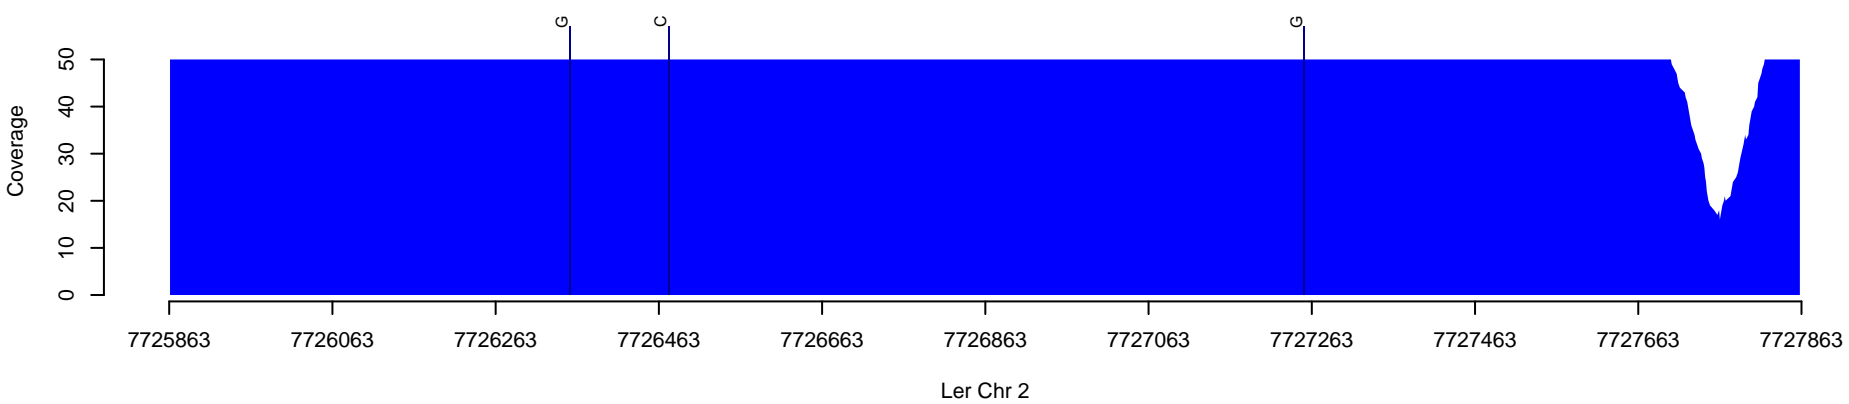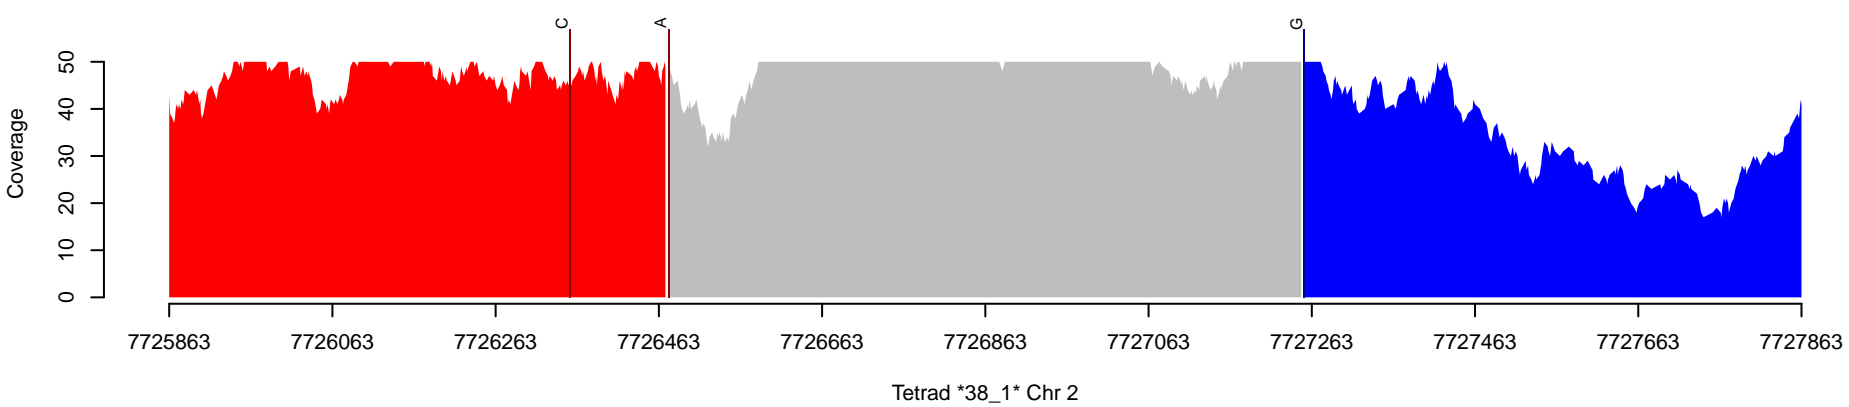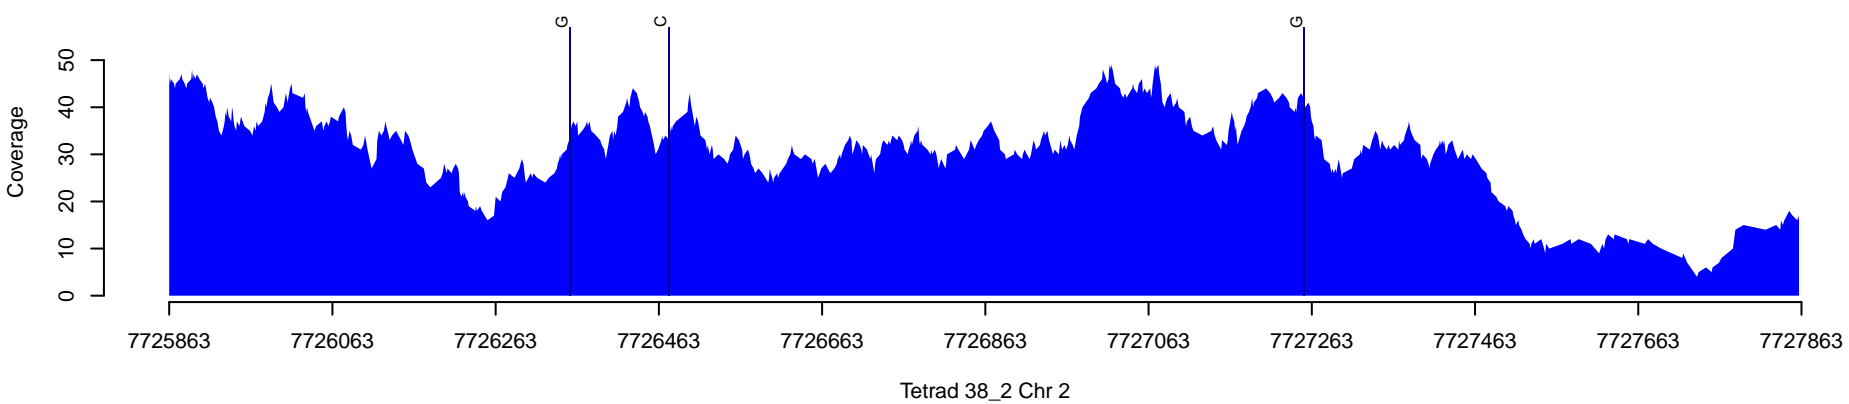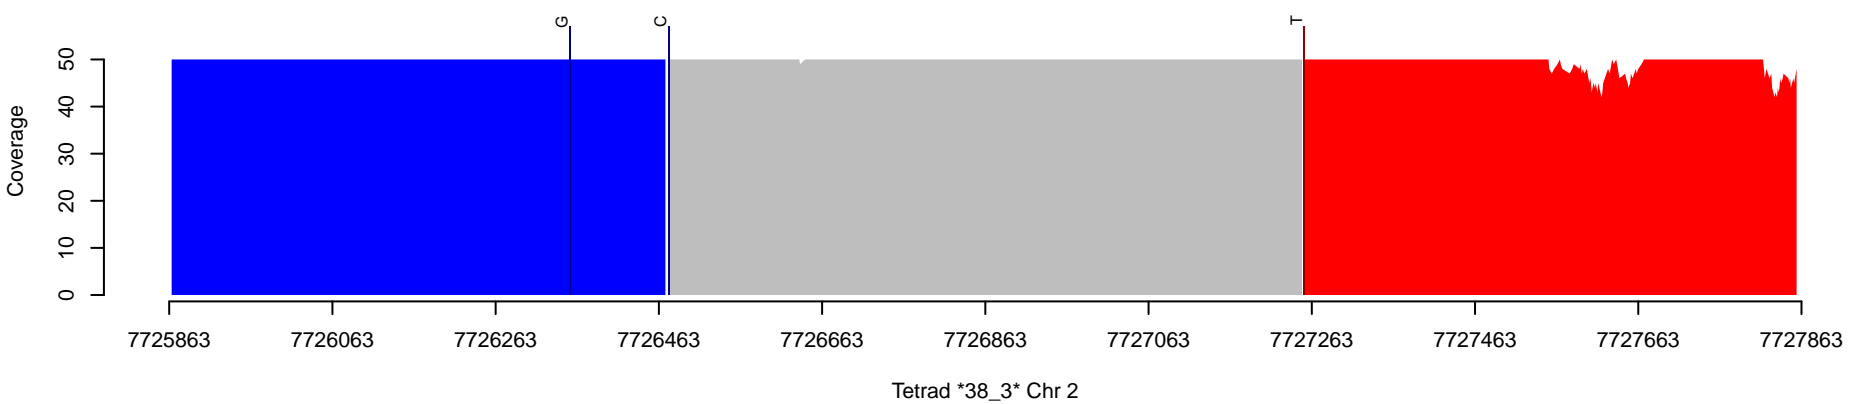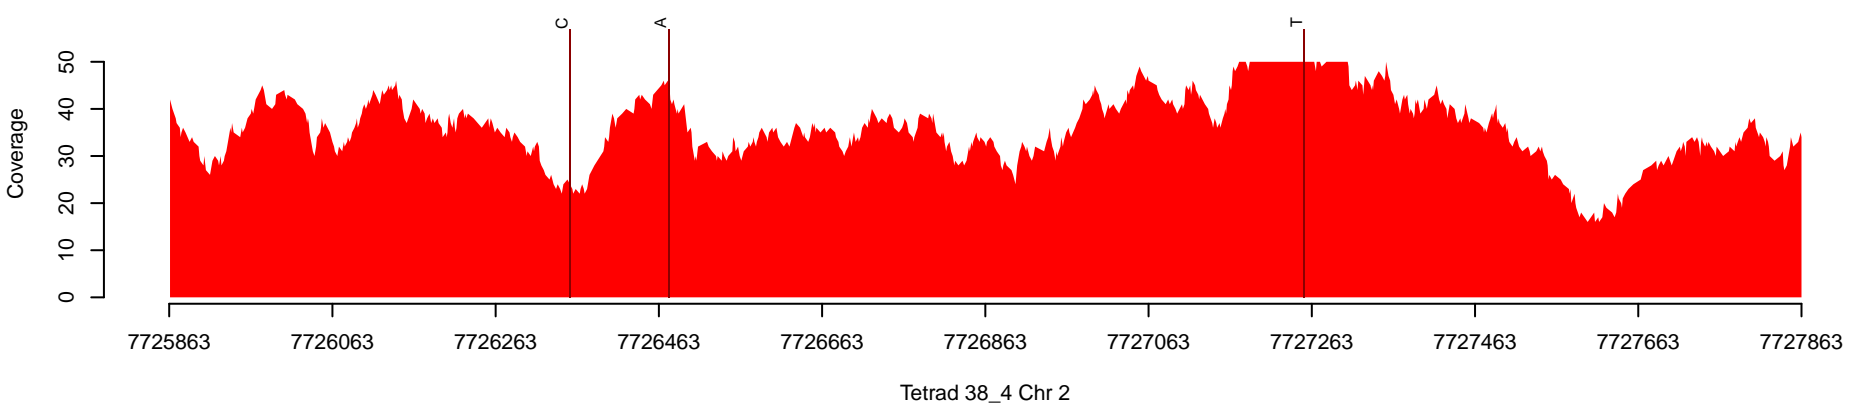

# ID14

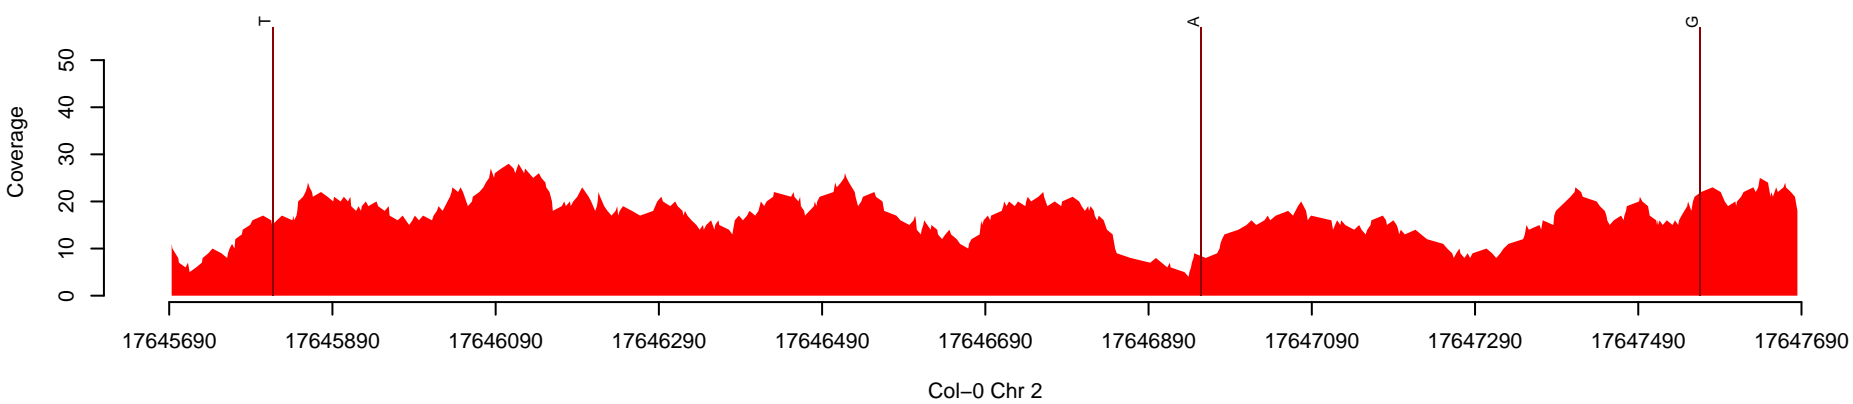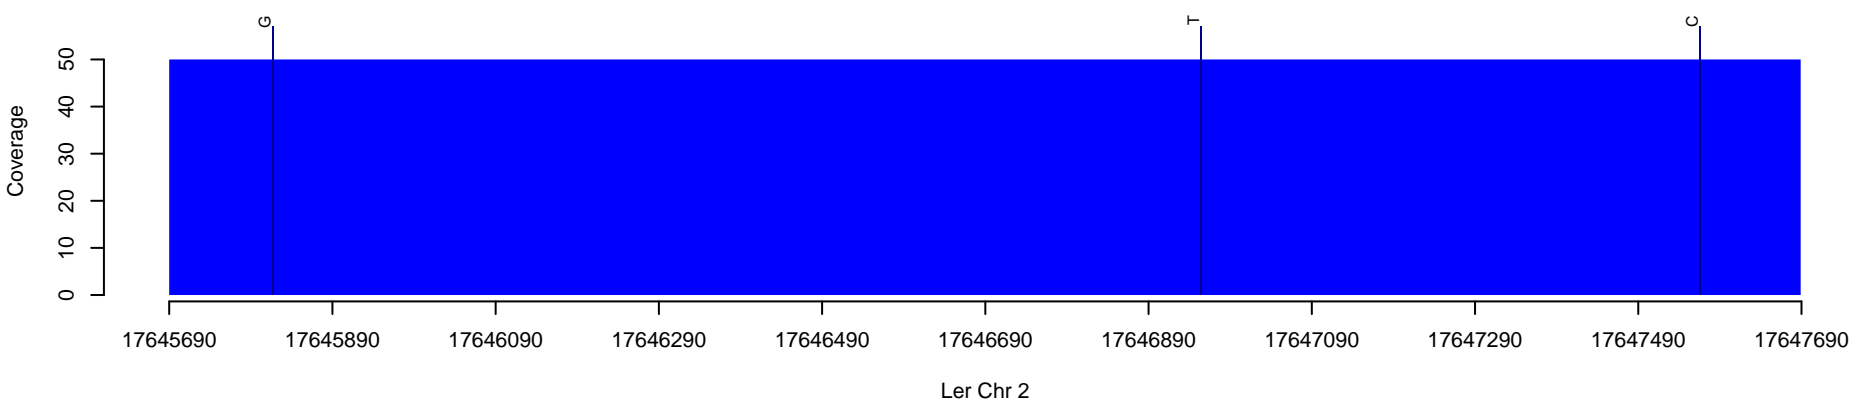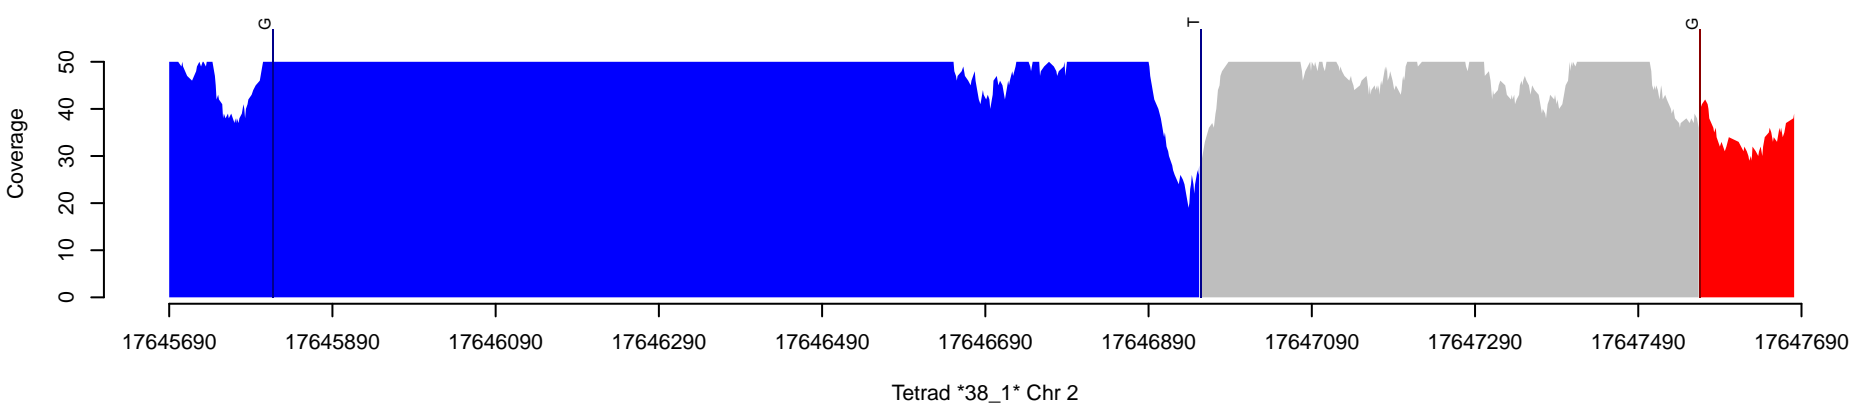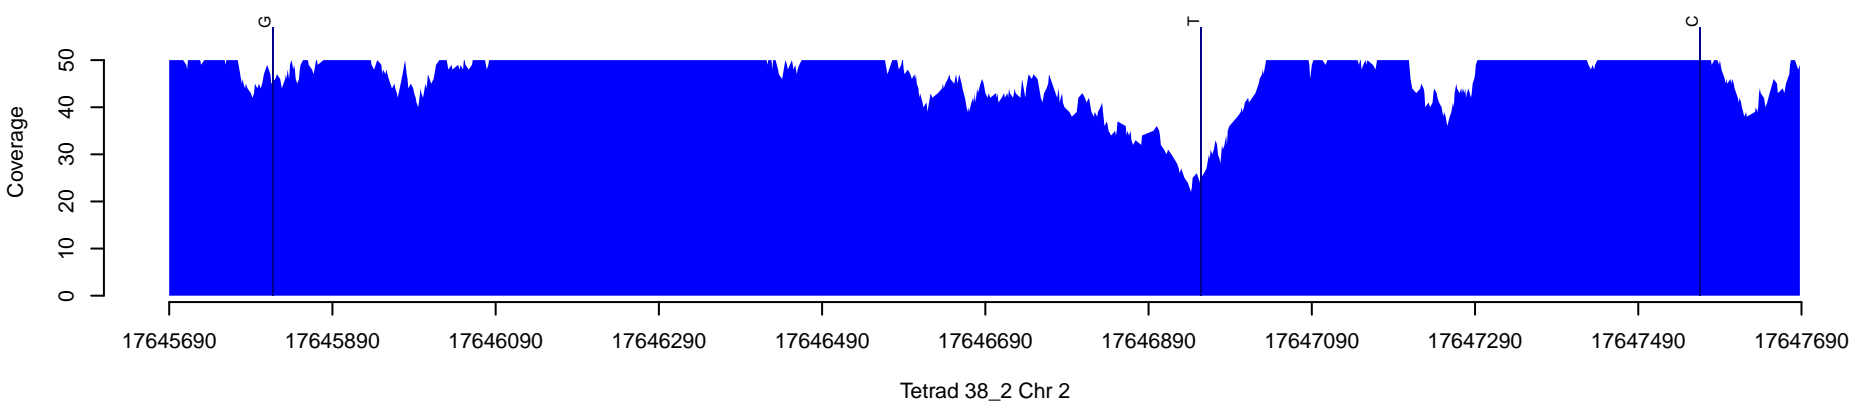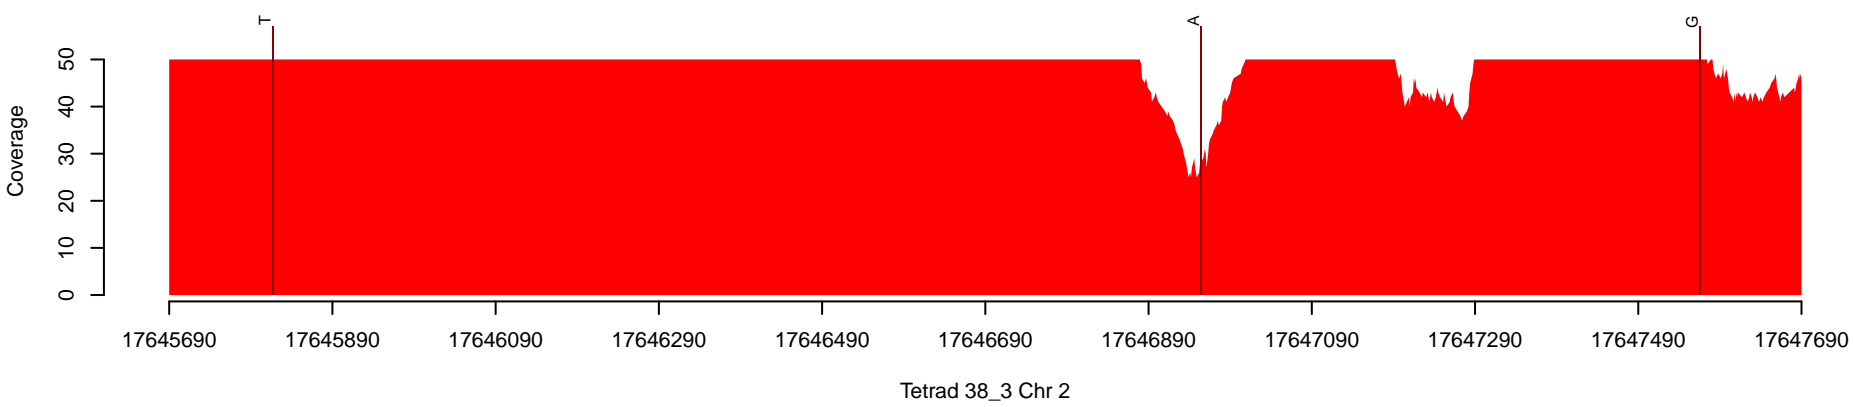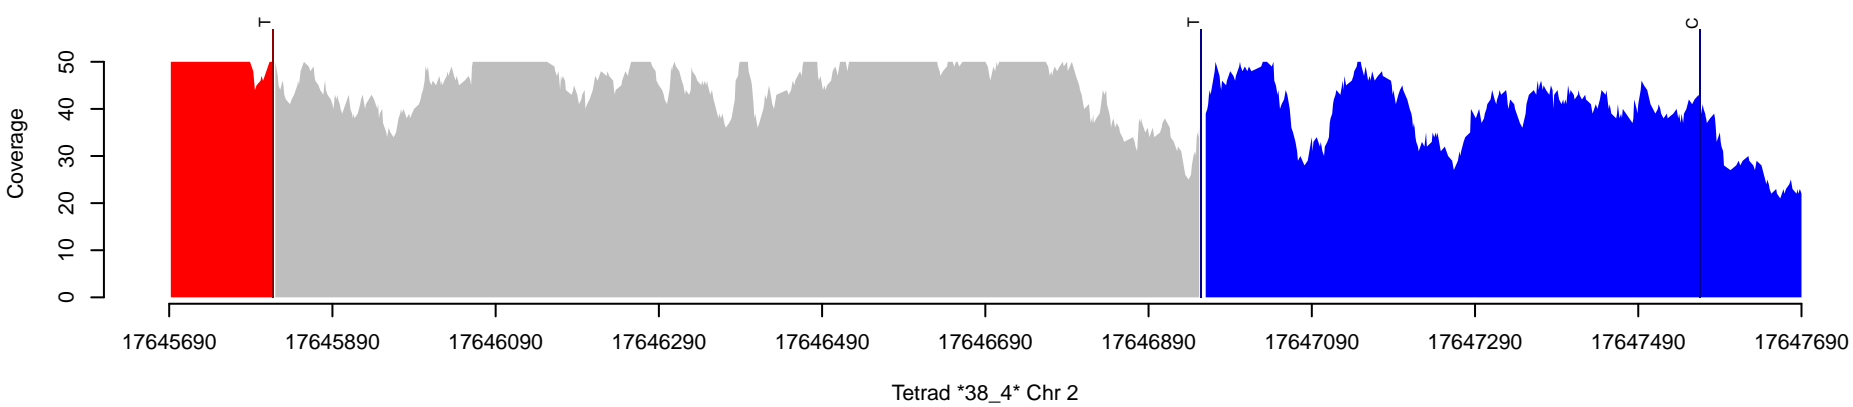

ID15

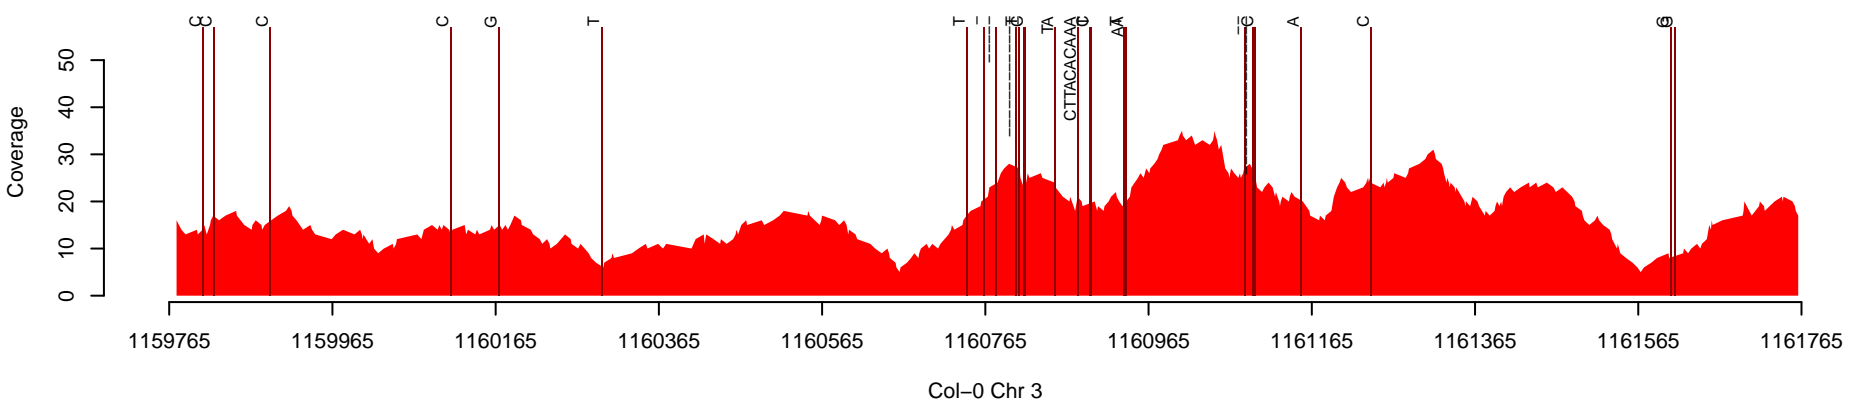

Col-0 Chr 3

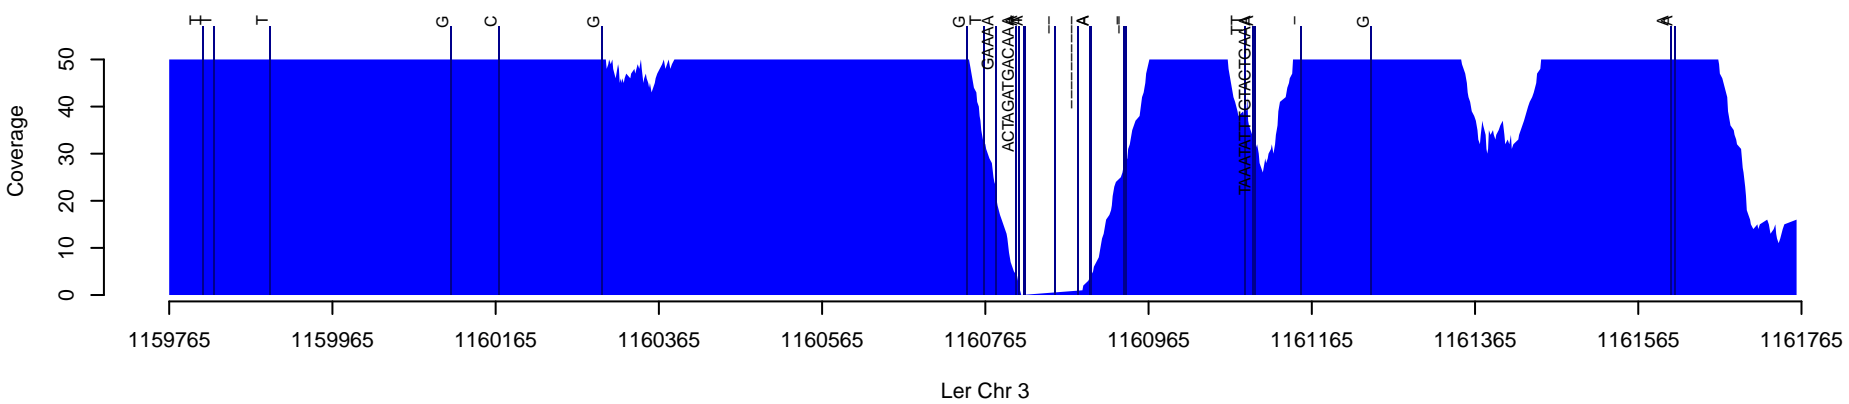

Ler Chr 3

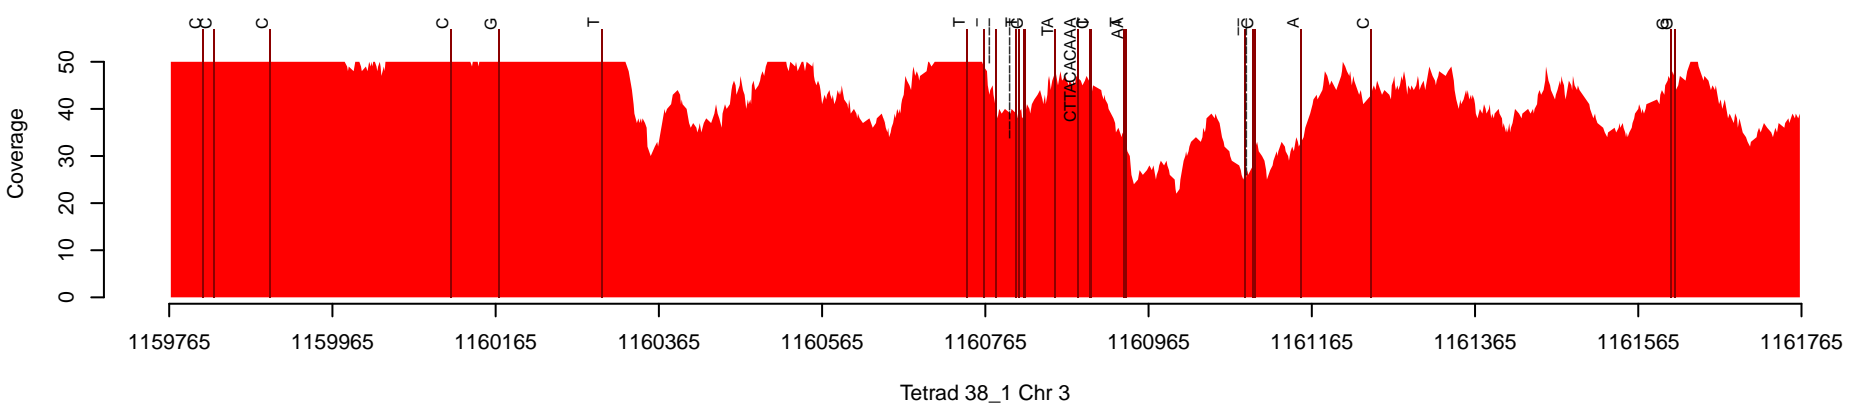

Tetrad 38\_1 Chr 3

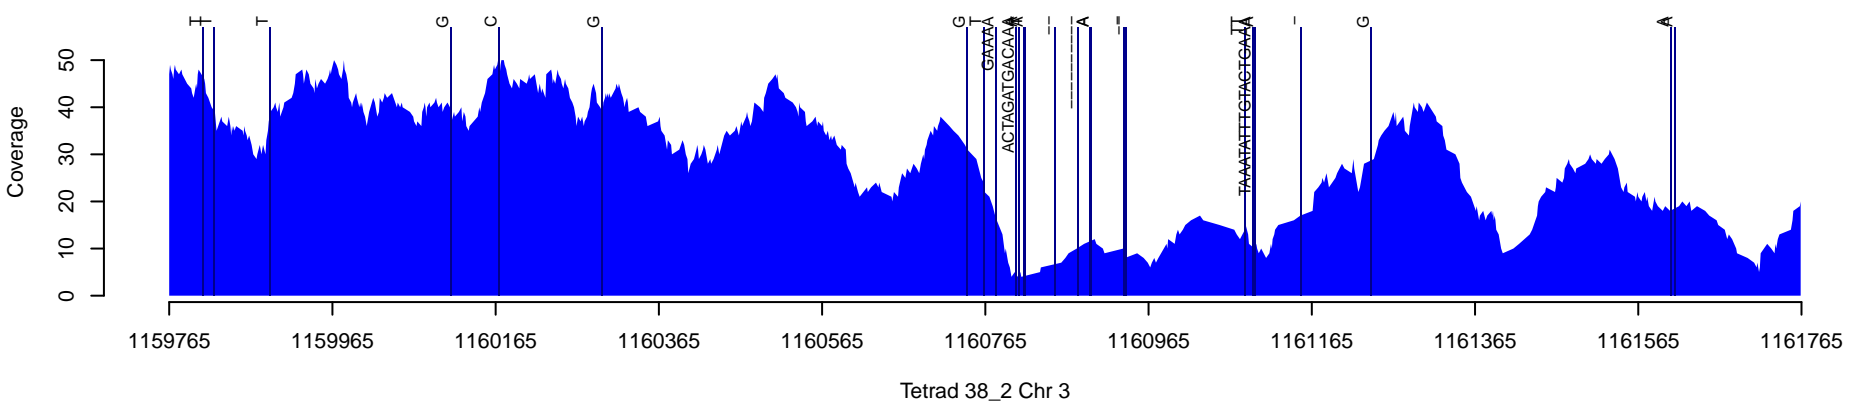

Tetrad 38\_2 Chr 3

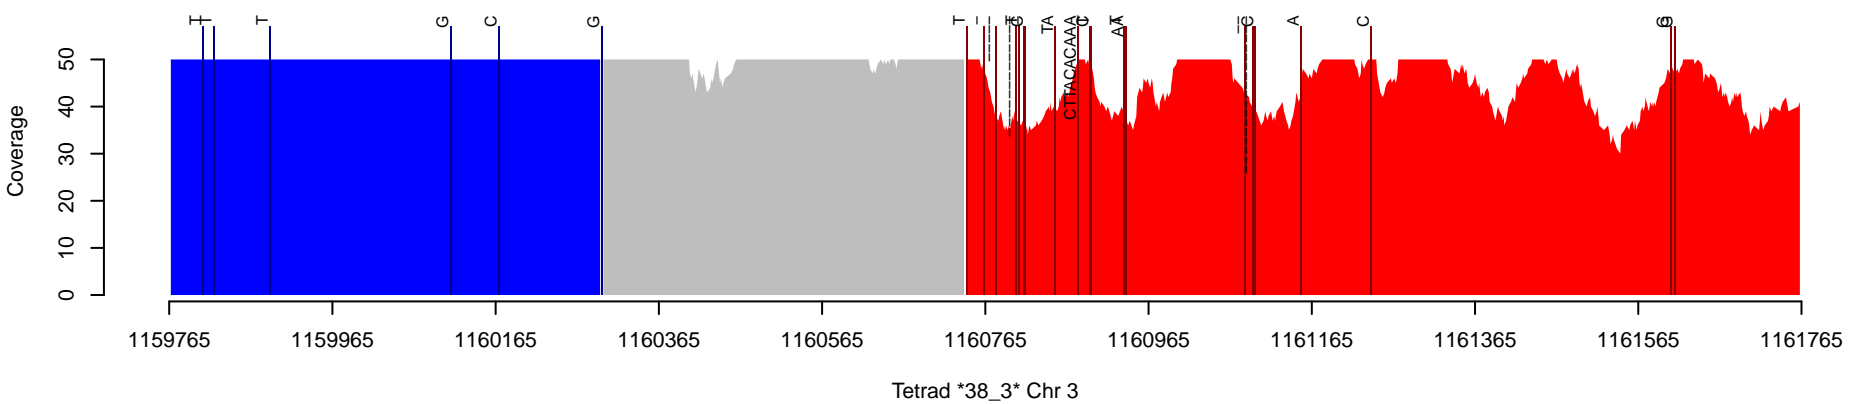

Tetrad \*38\_3\* Chr 3

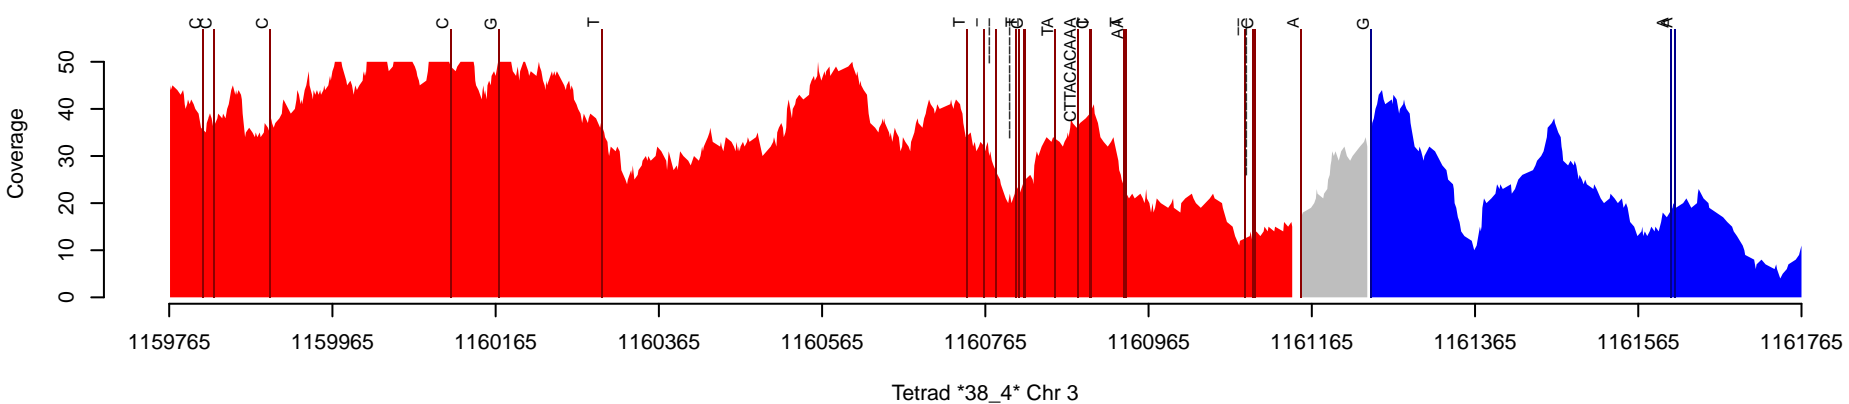

Tetrad \*38\_4\* Chr 3

# ID16

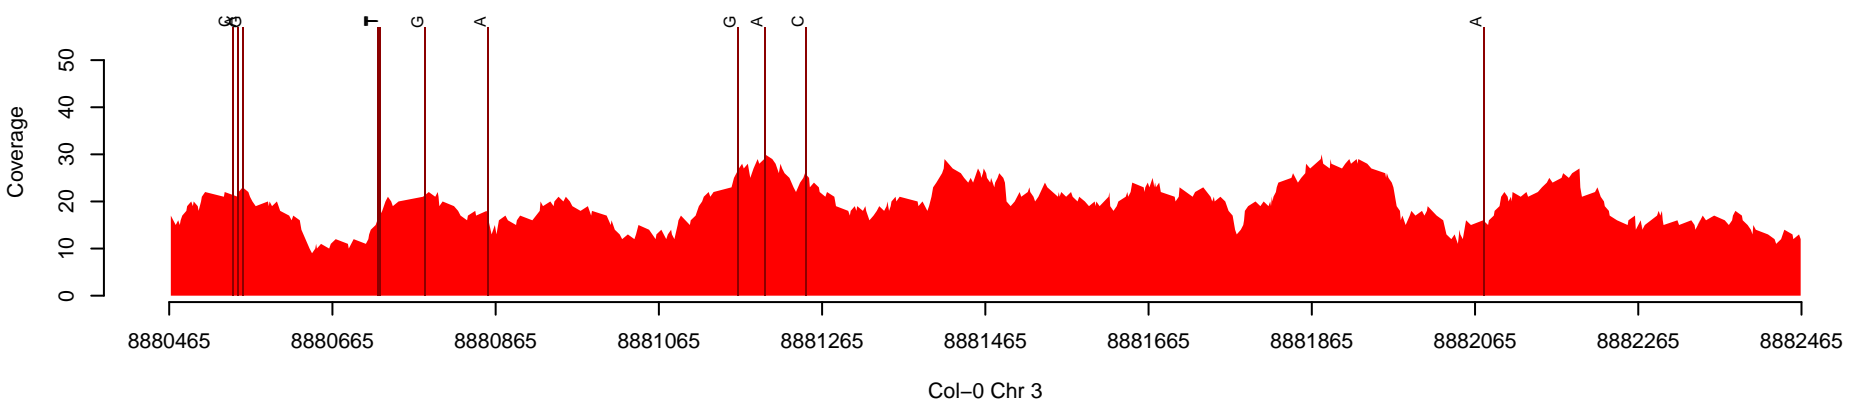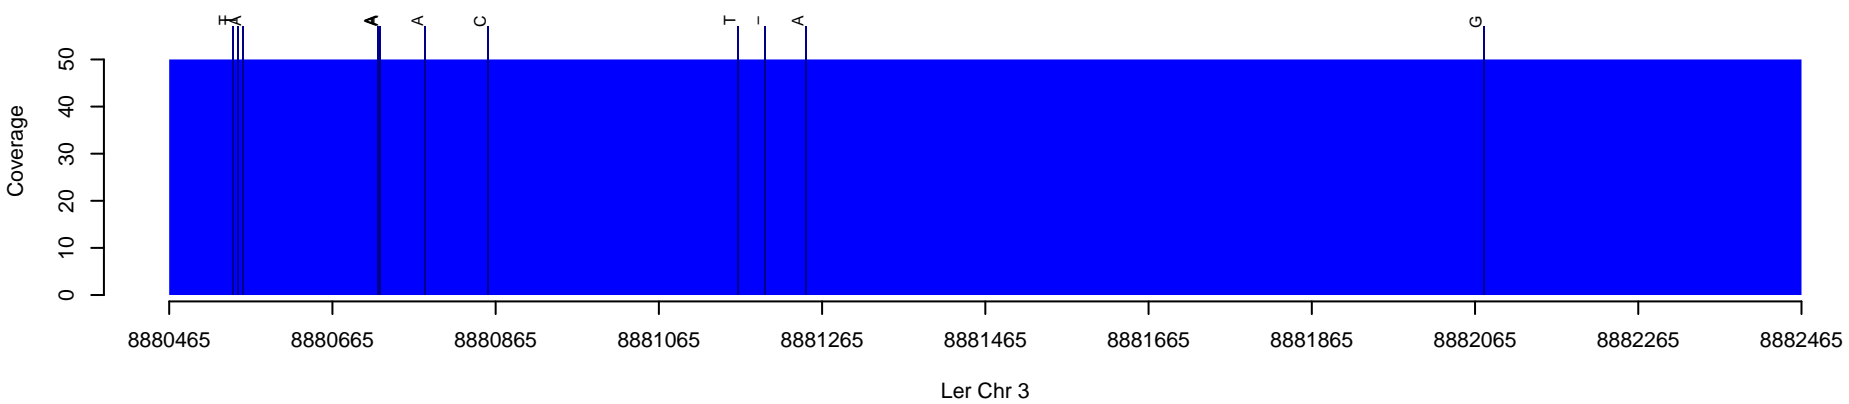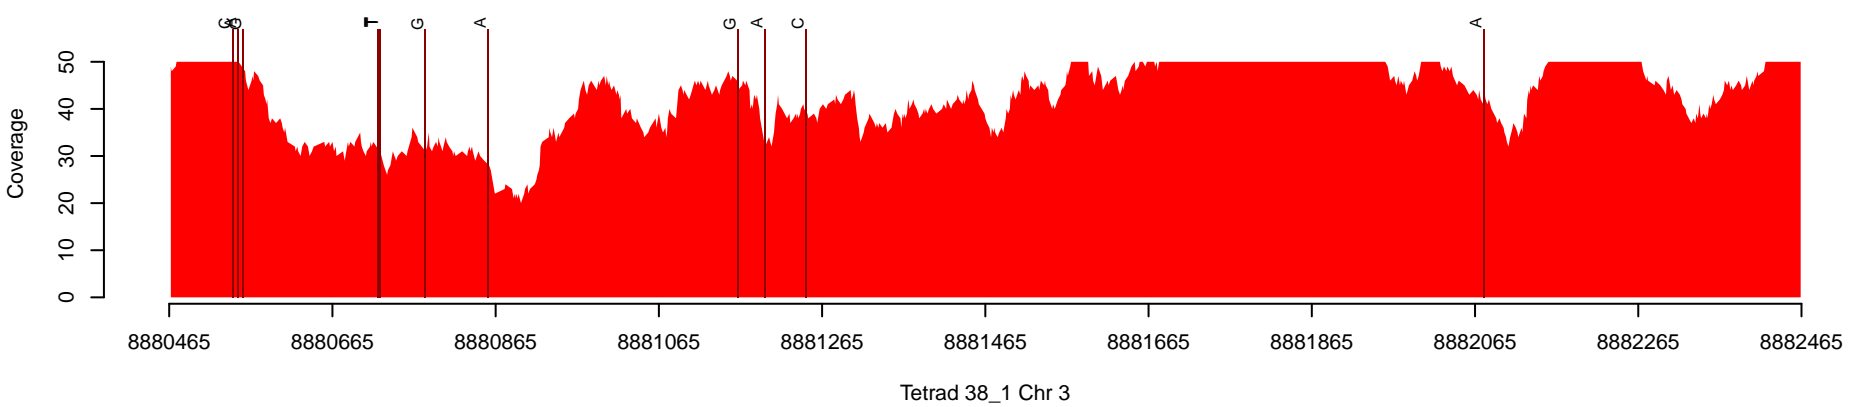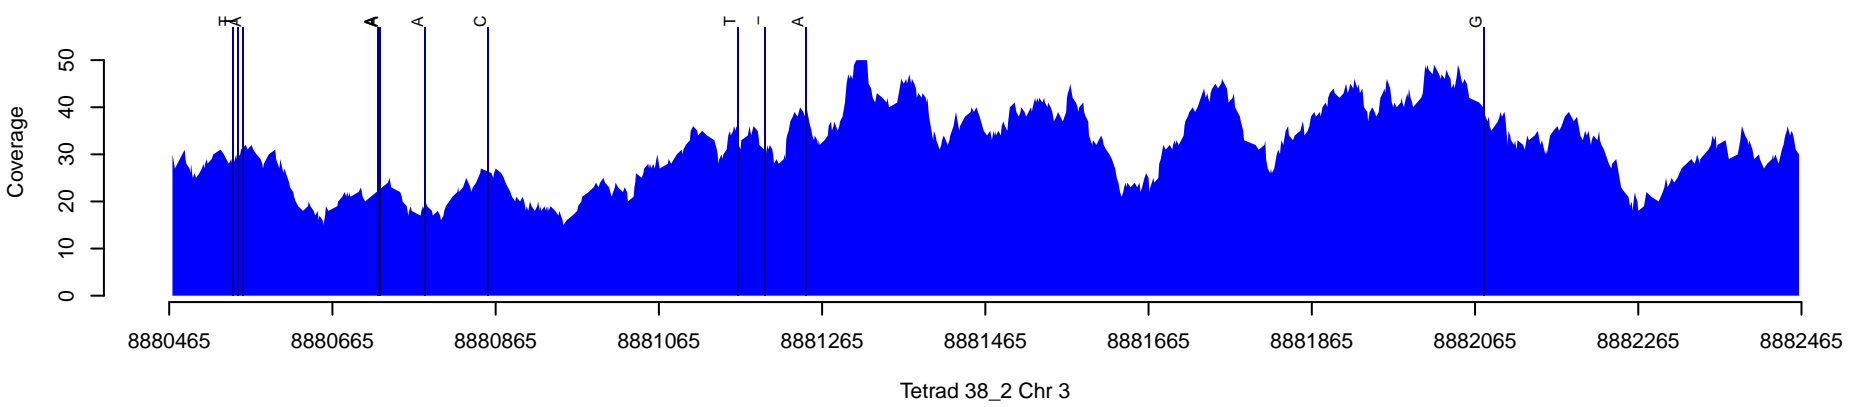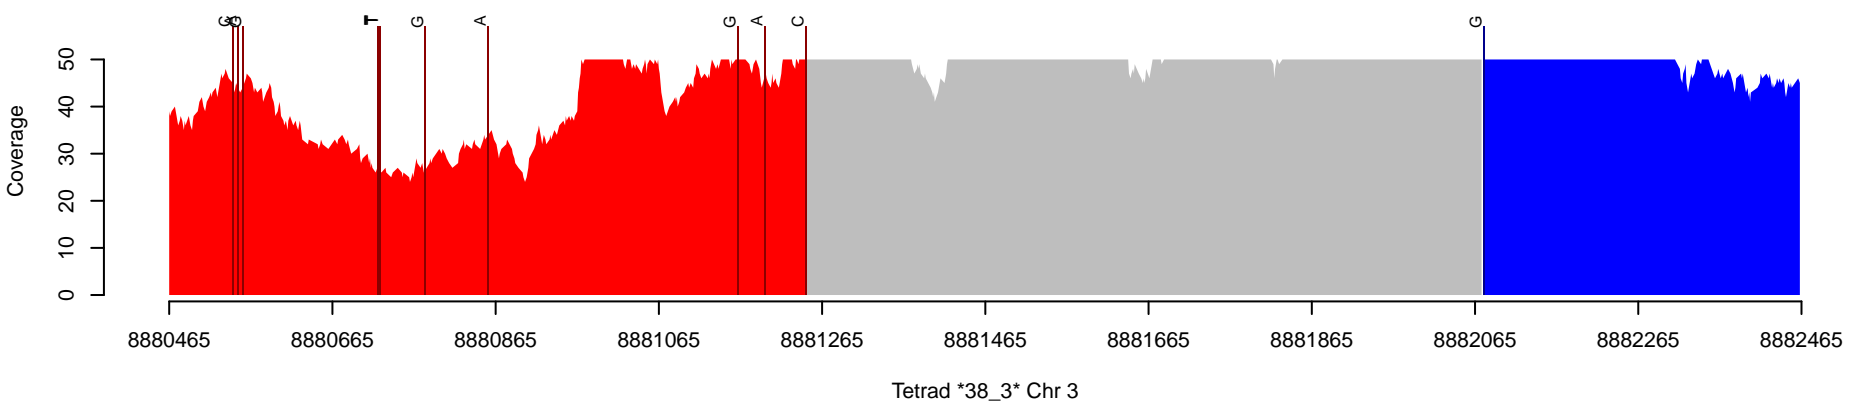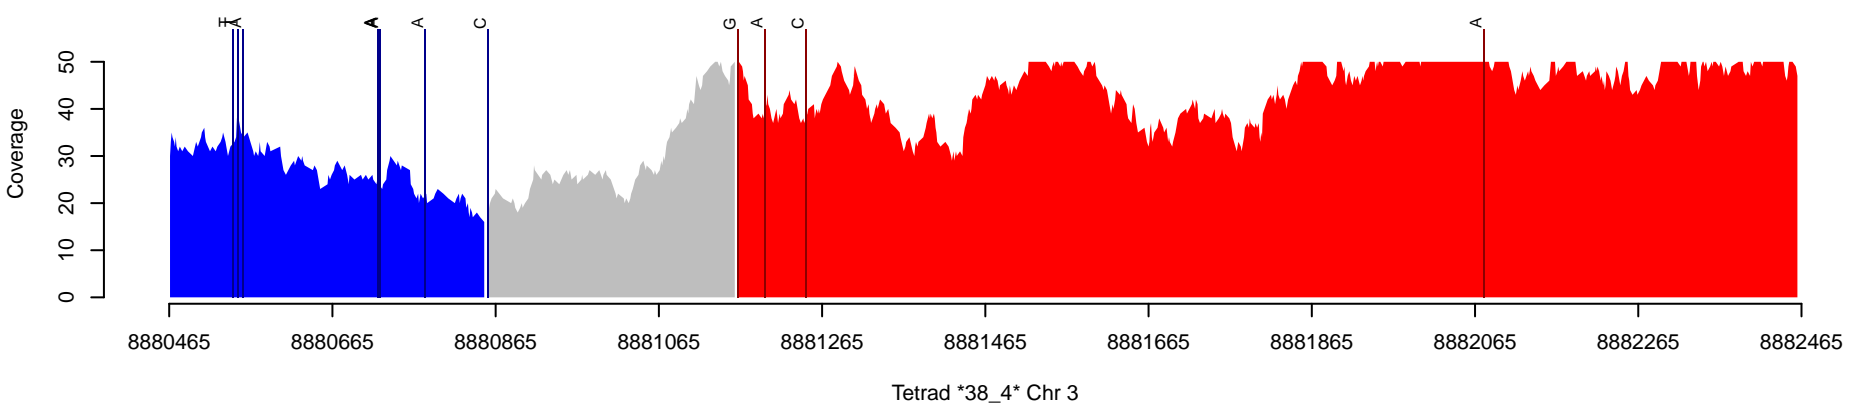



# ID17

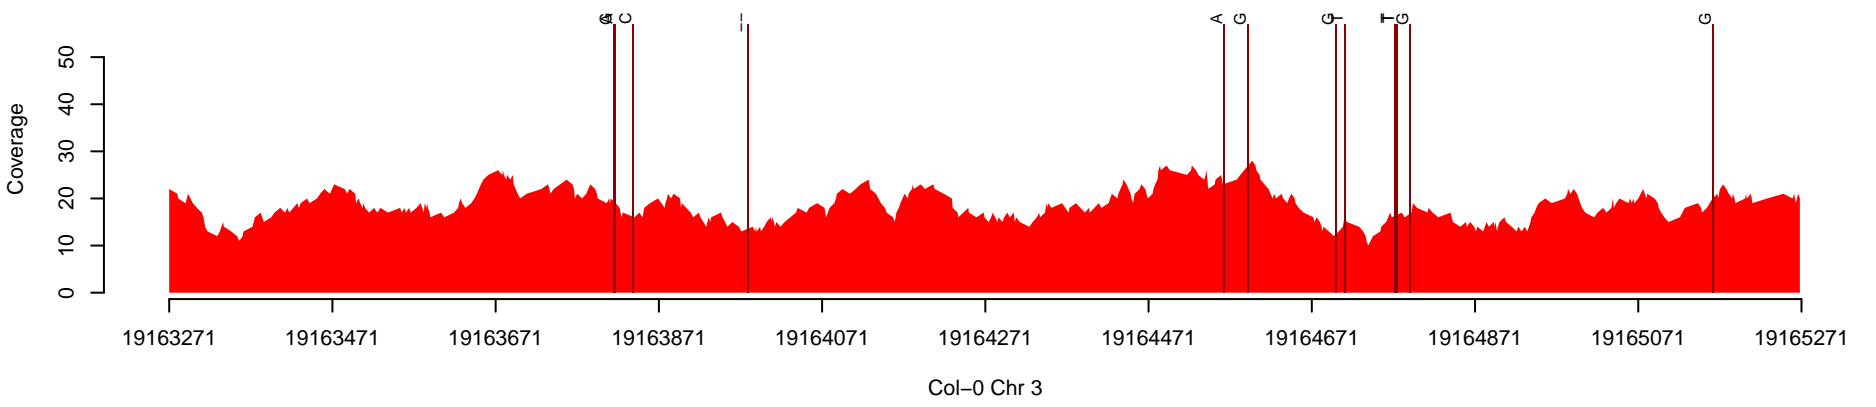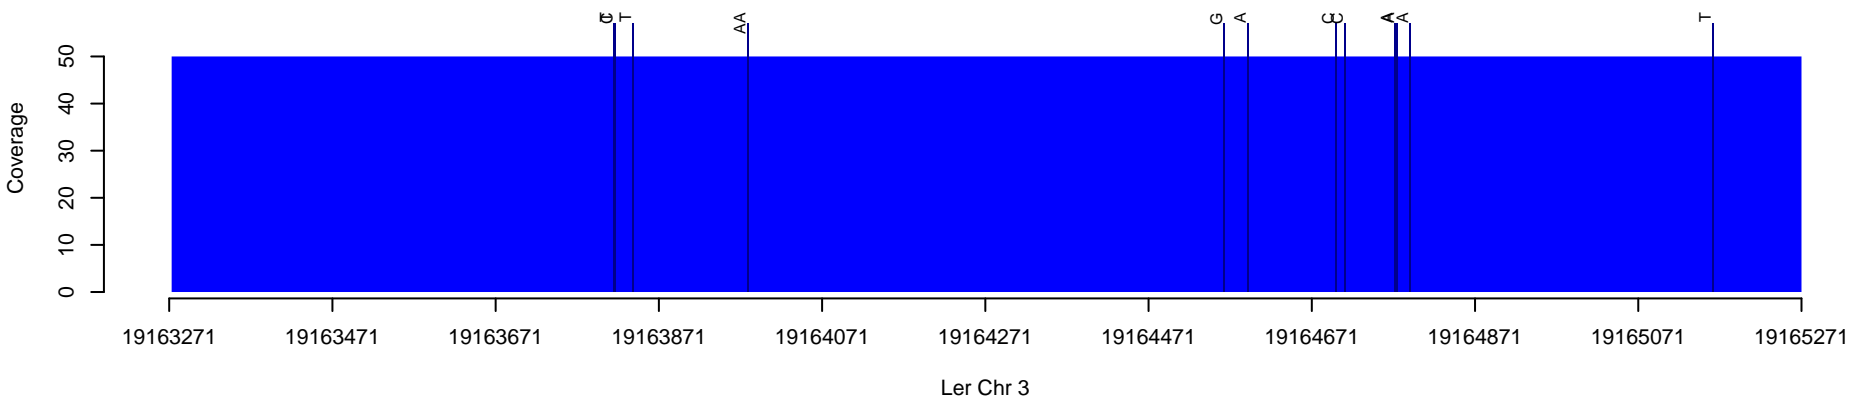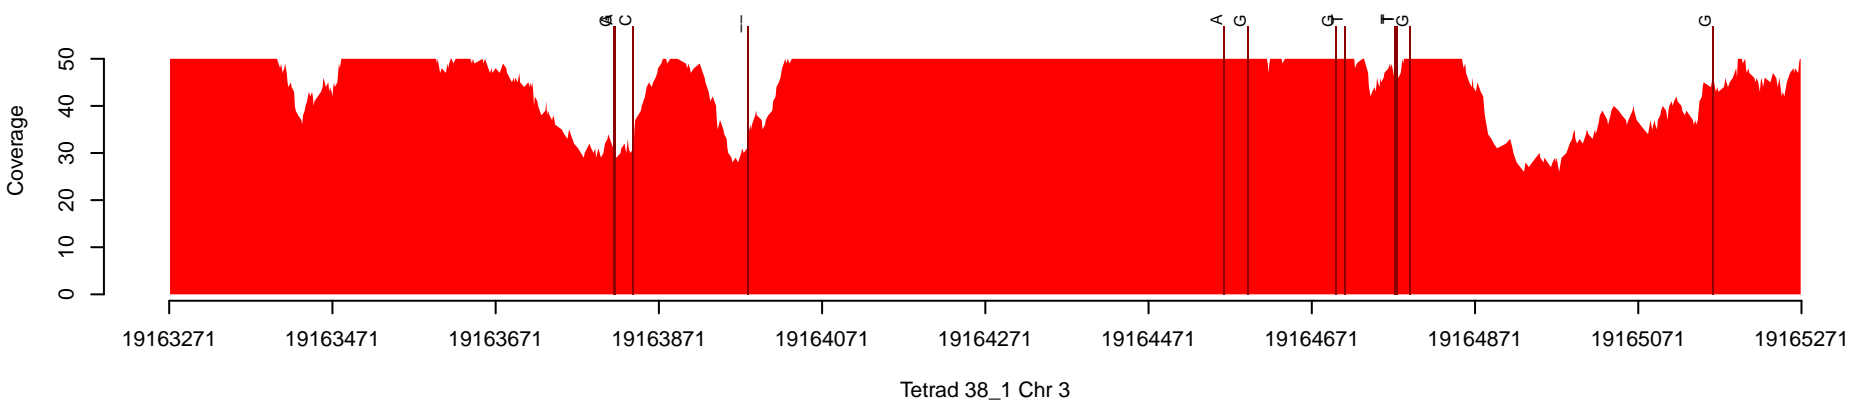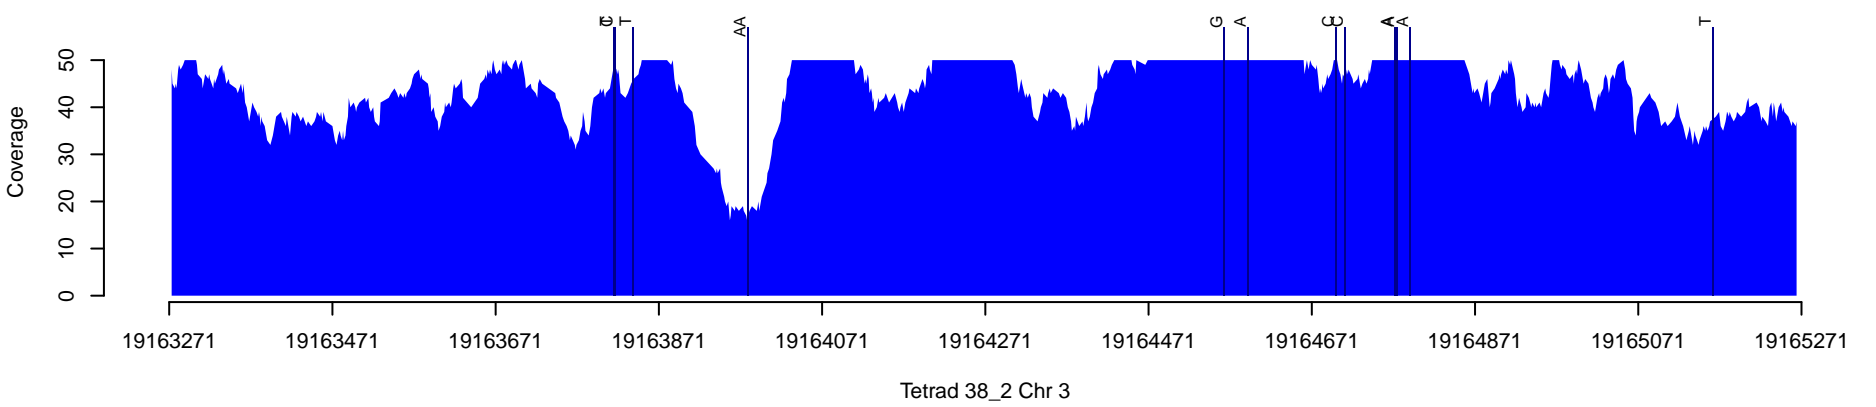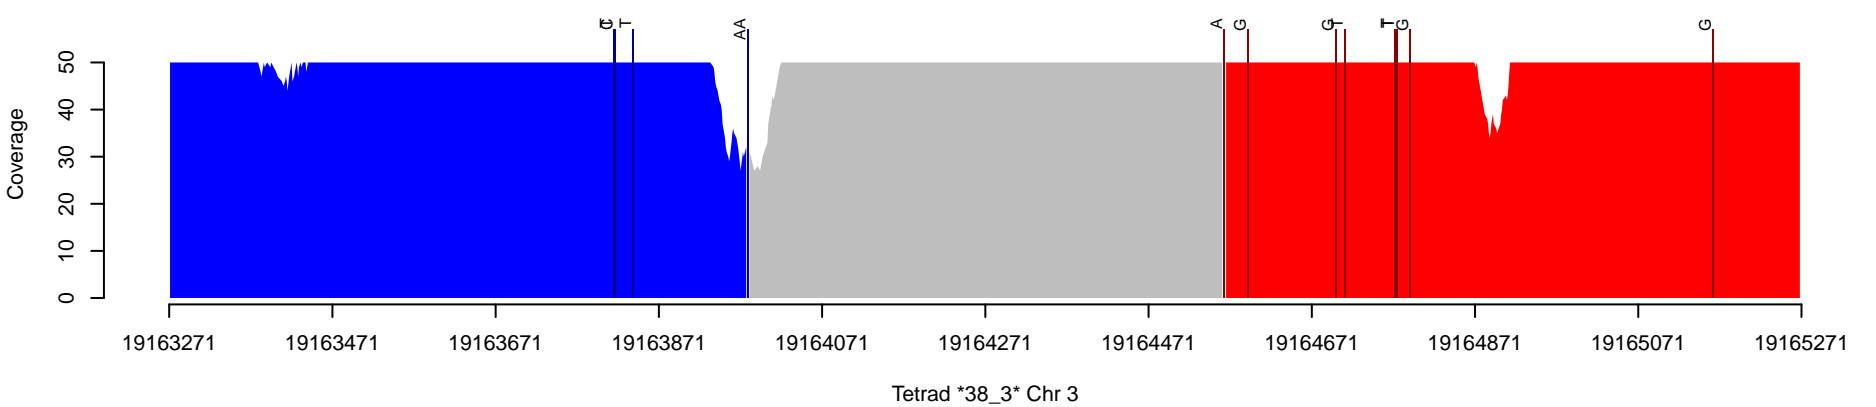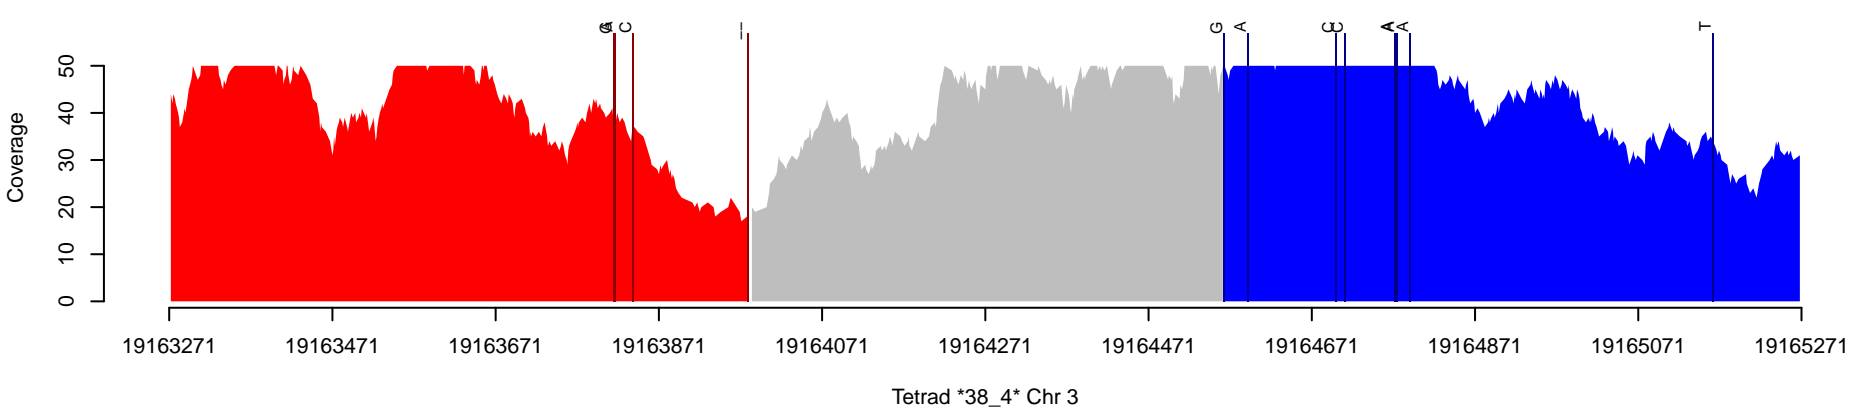

# ID18

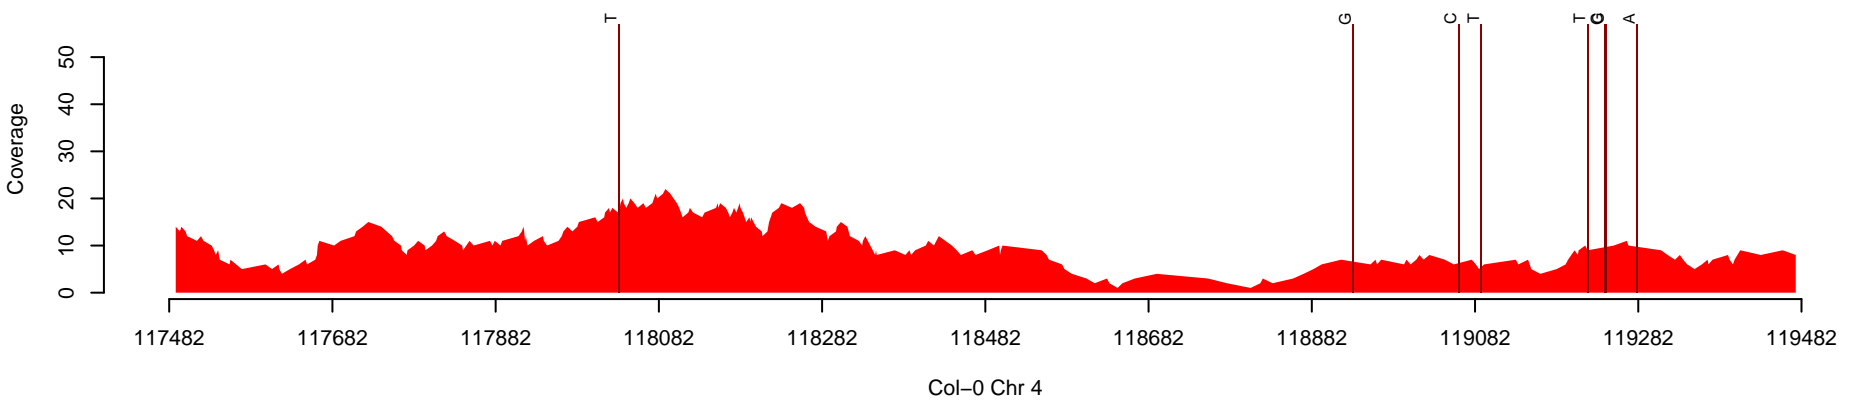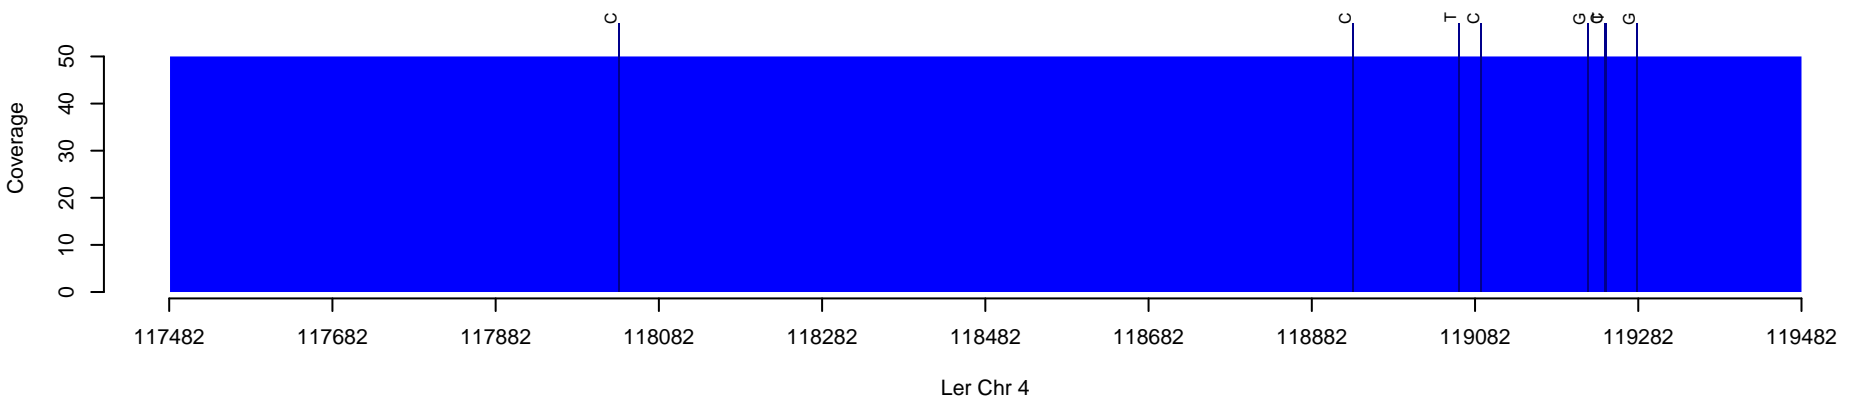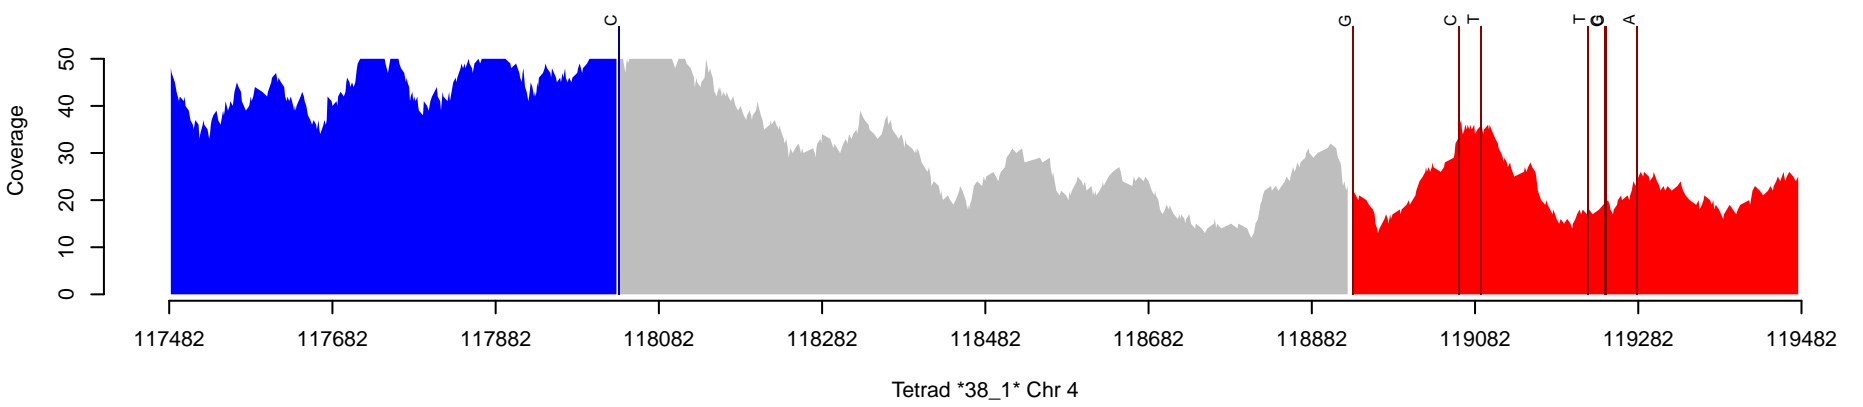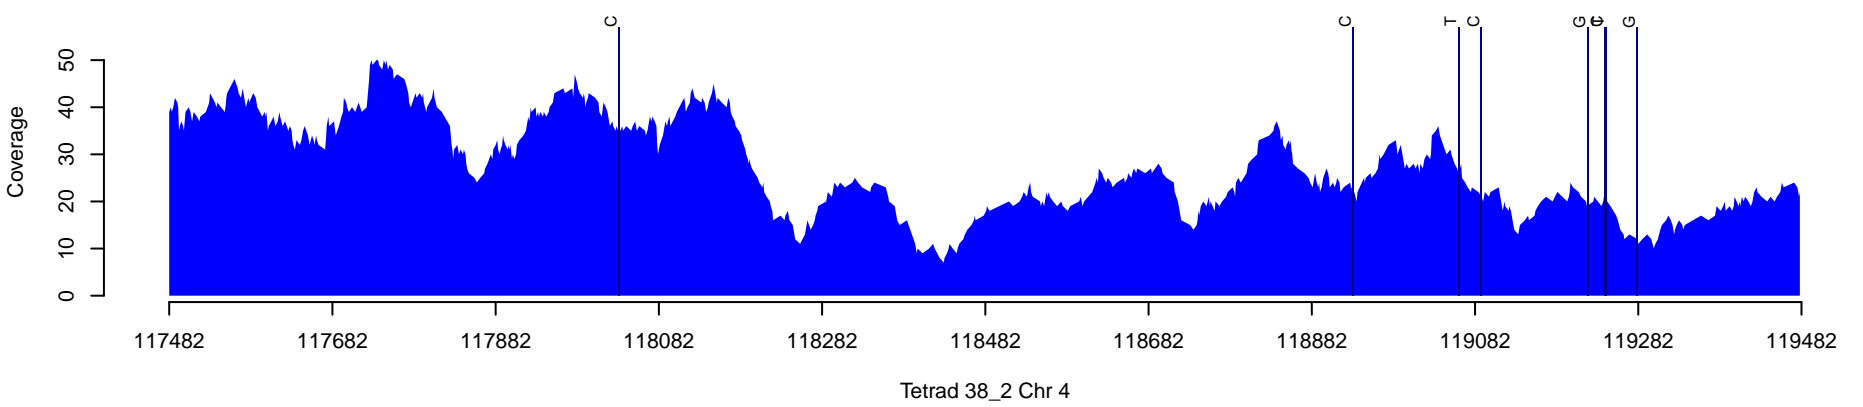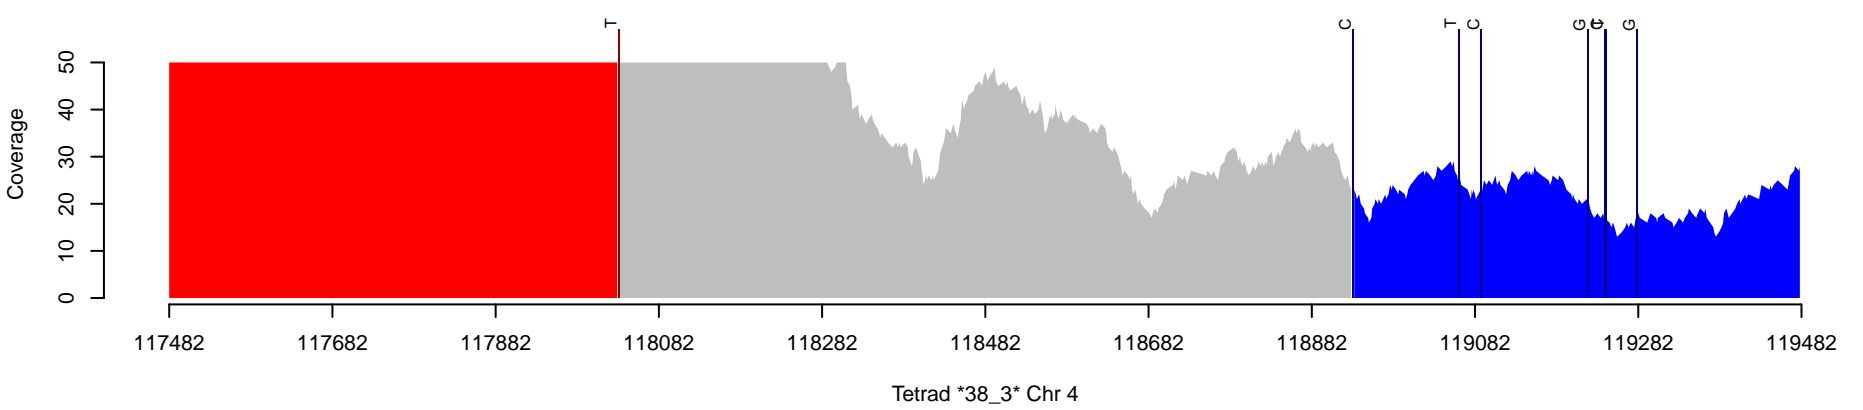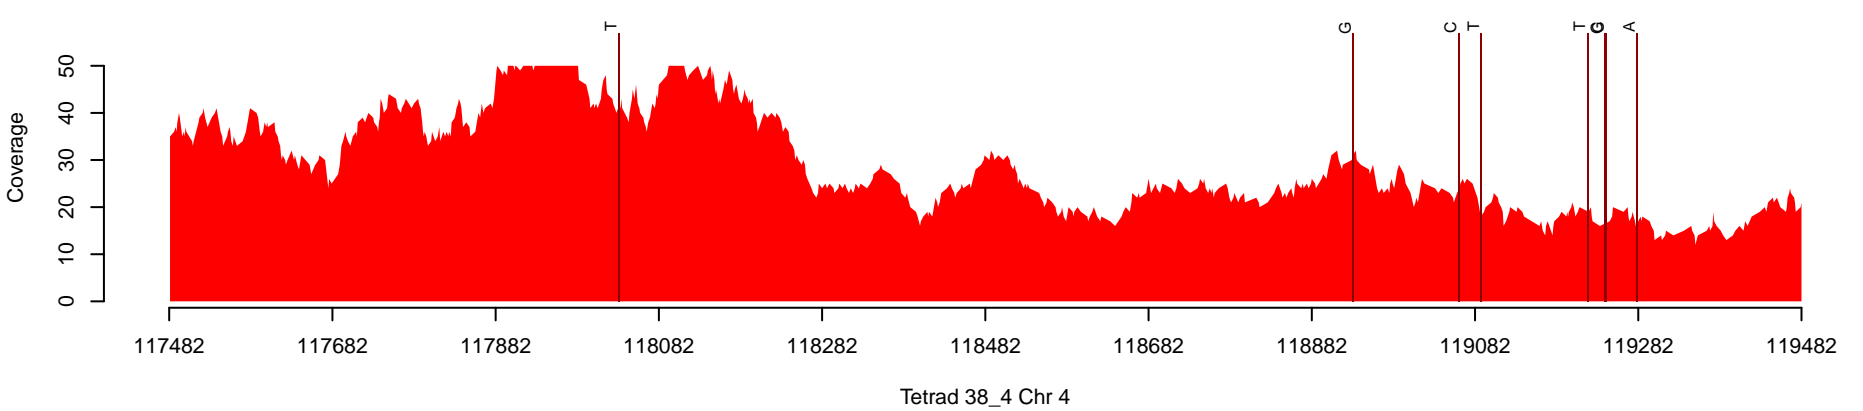

# ID19

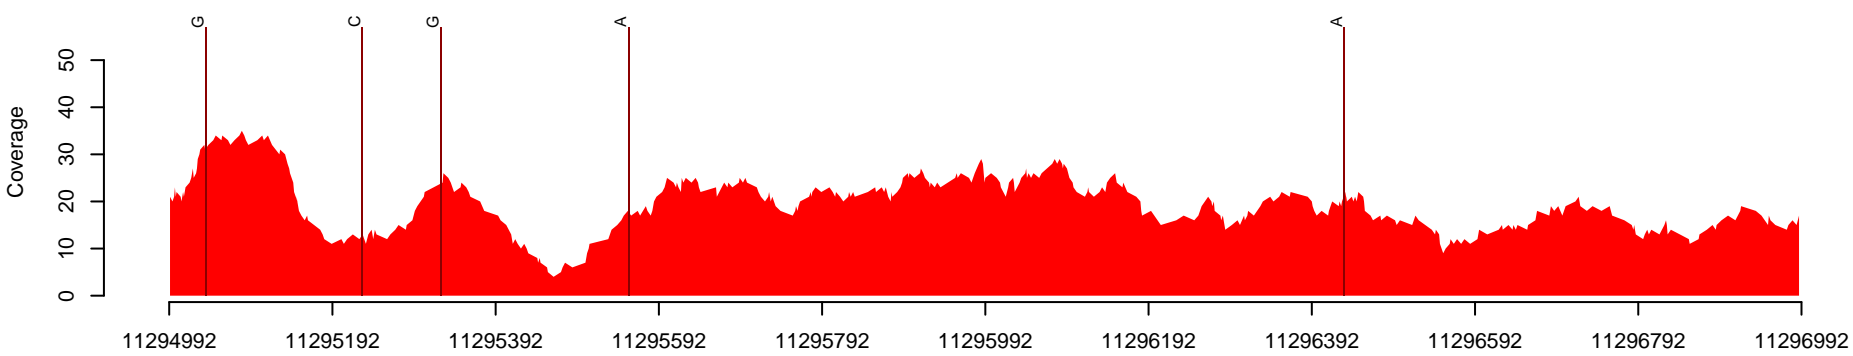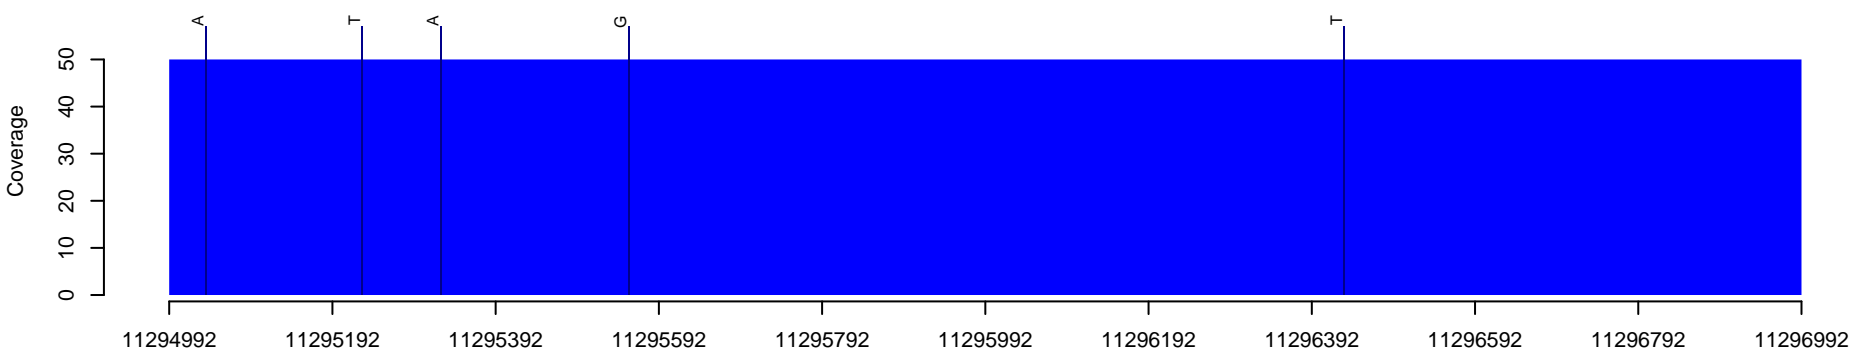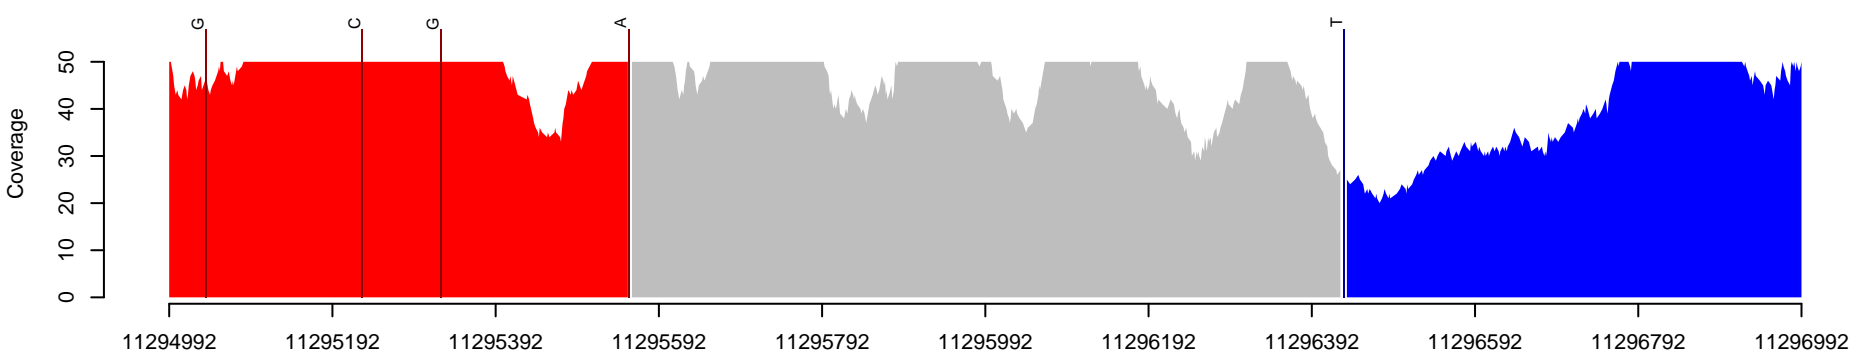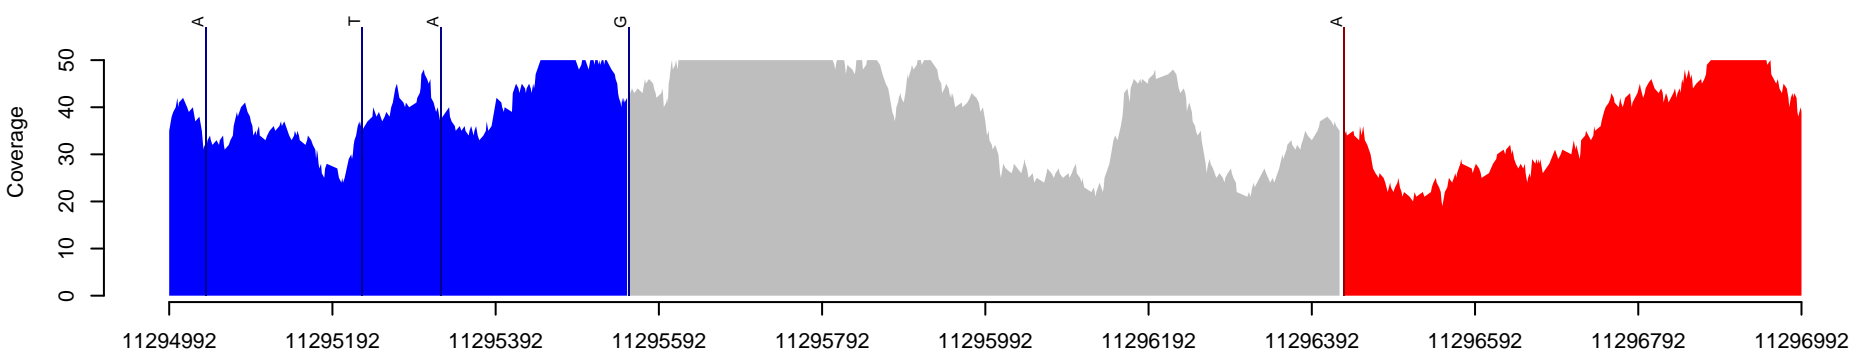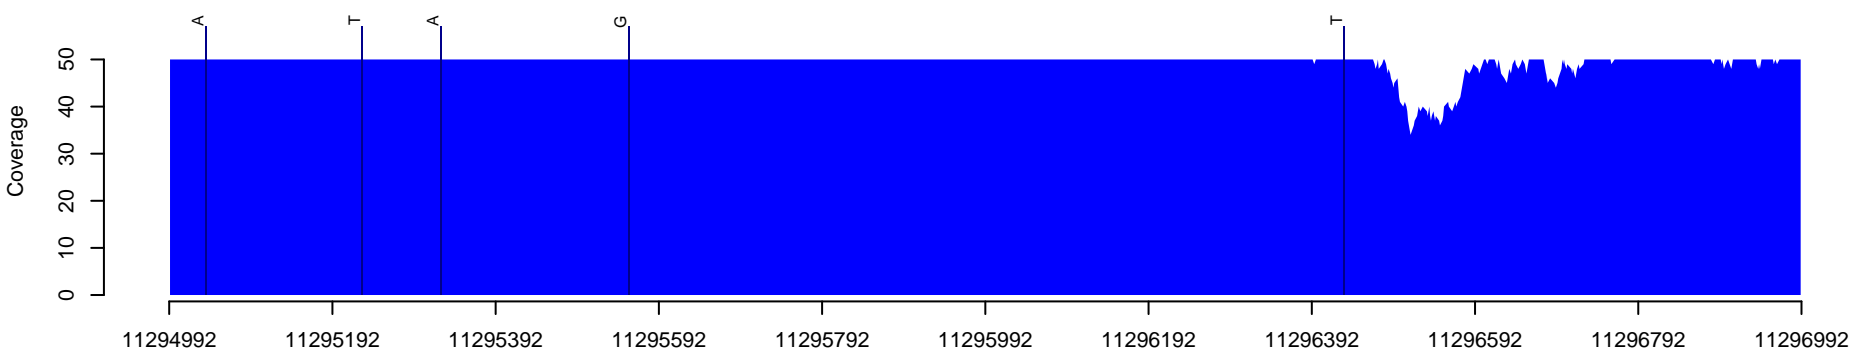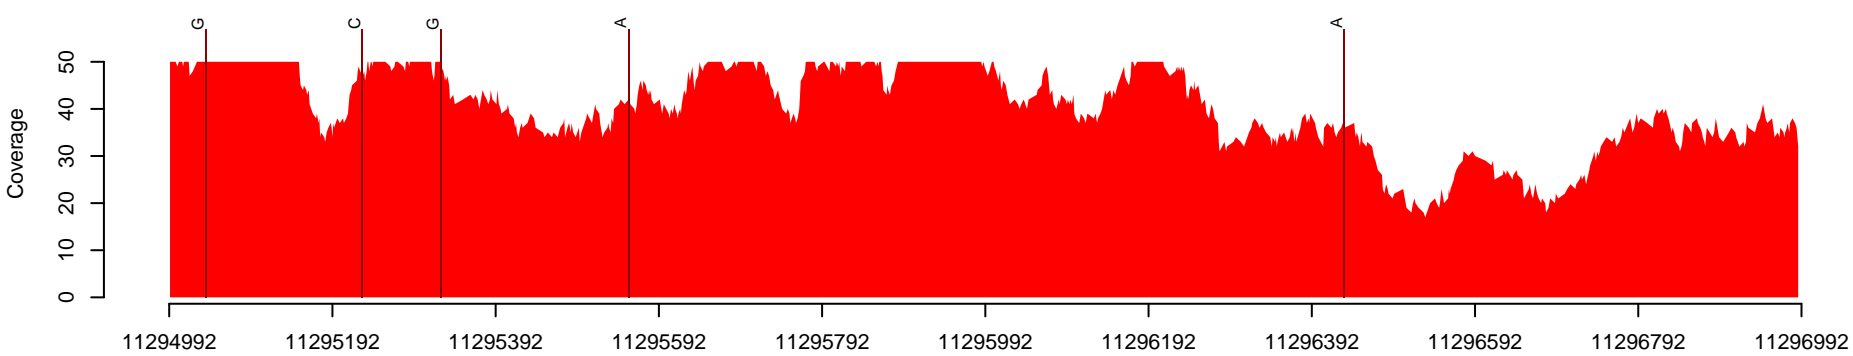

# ID20

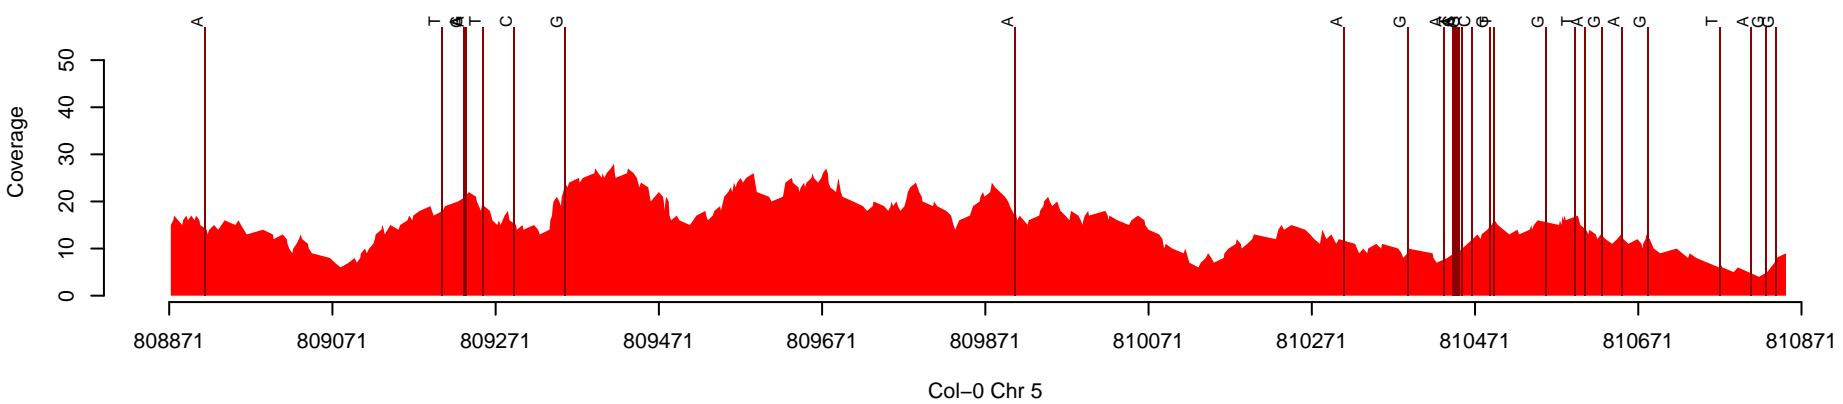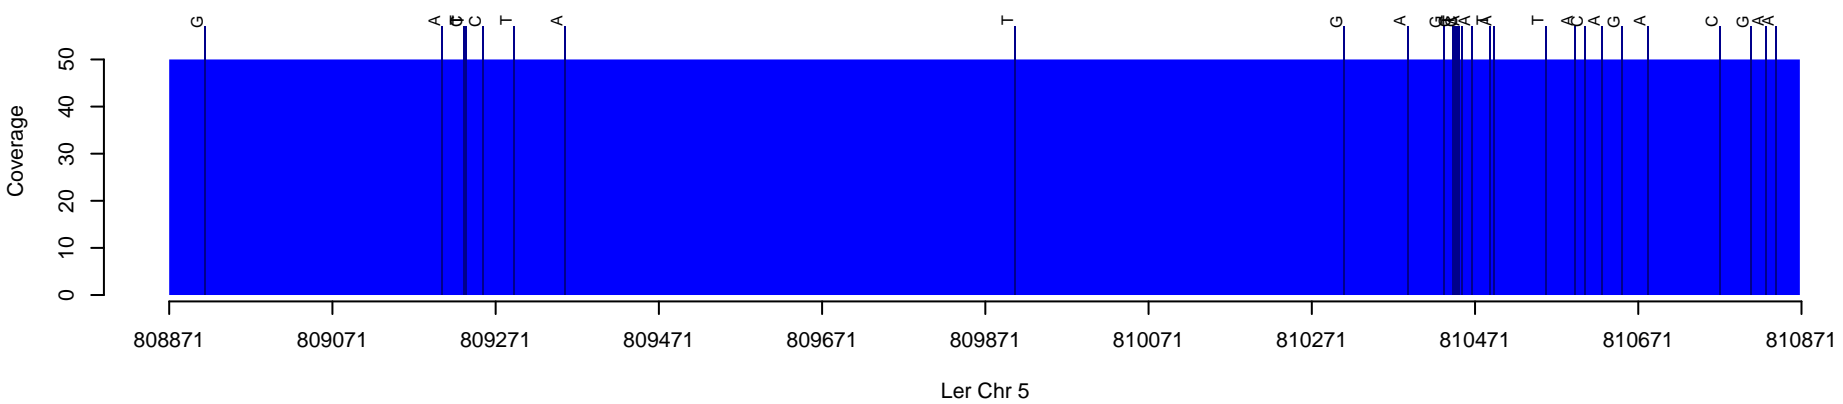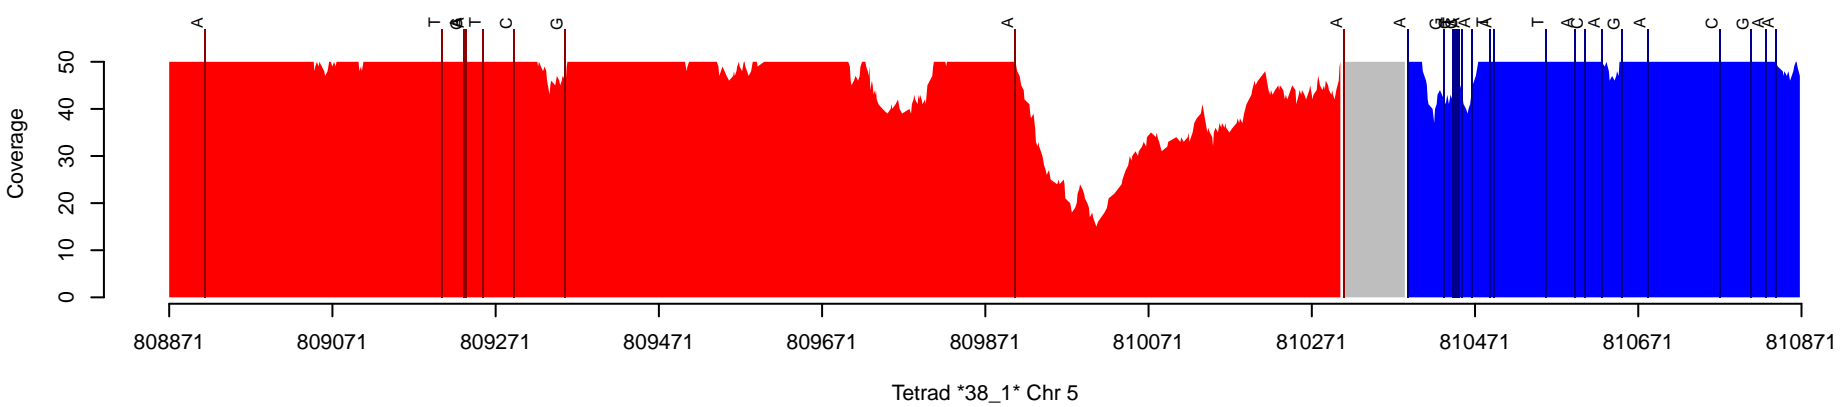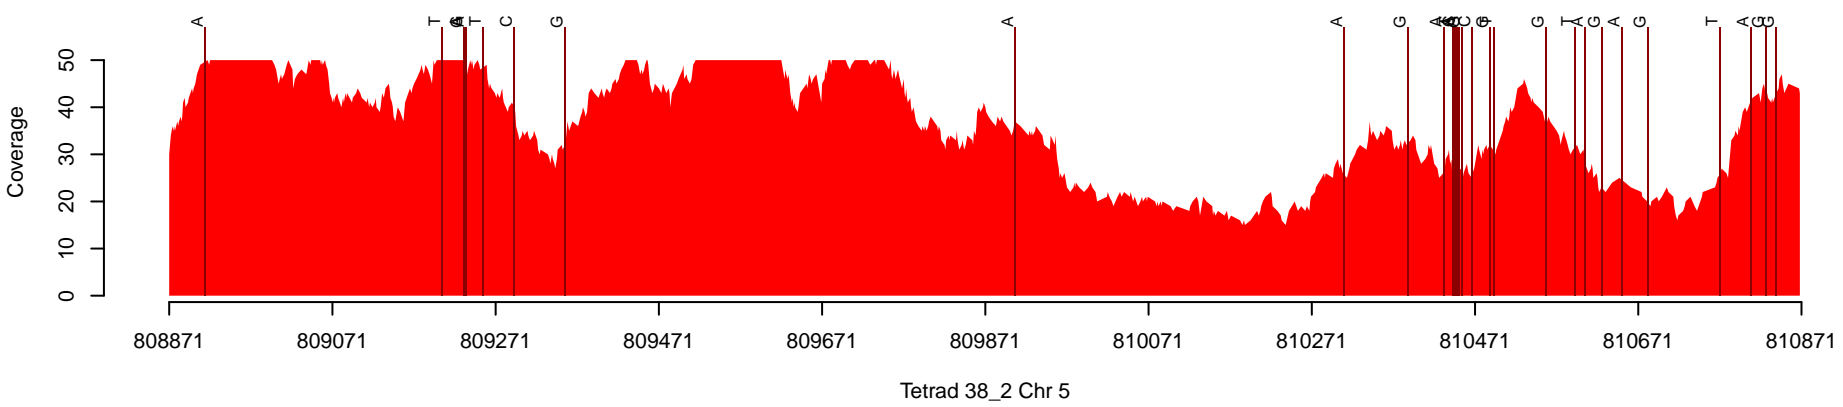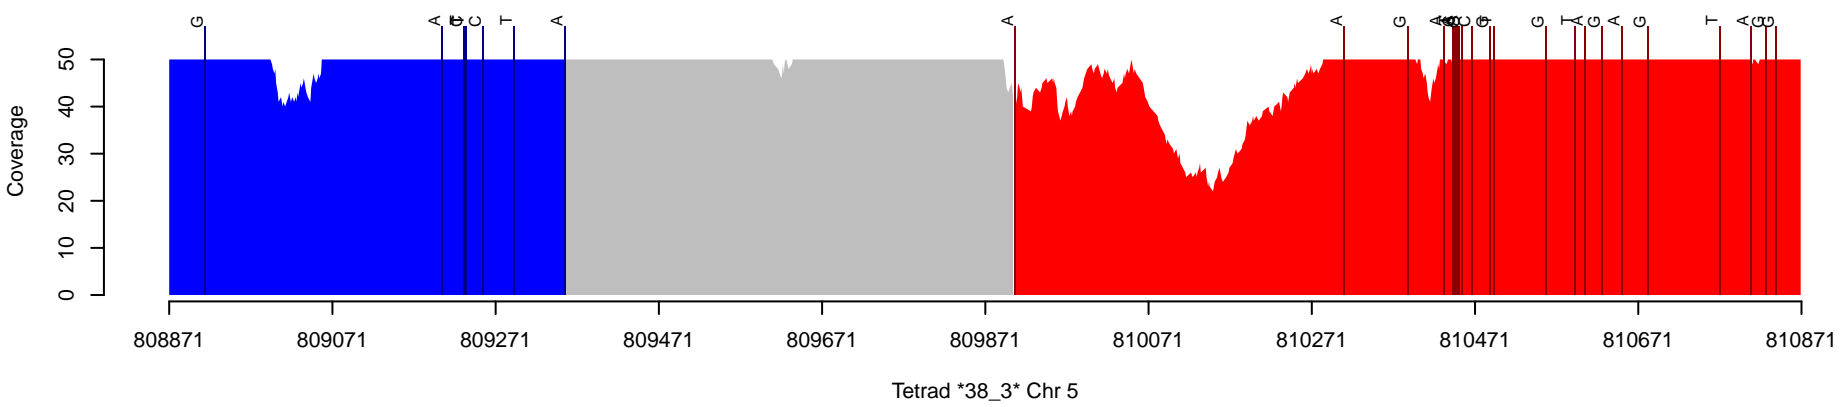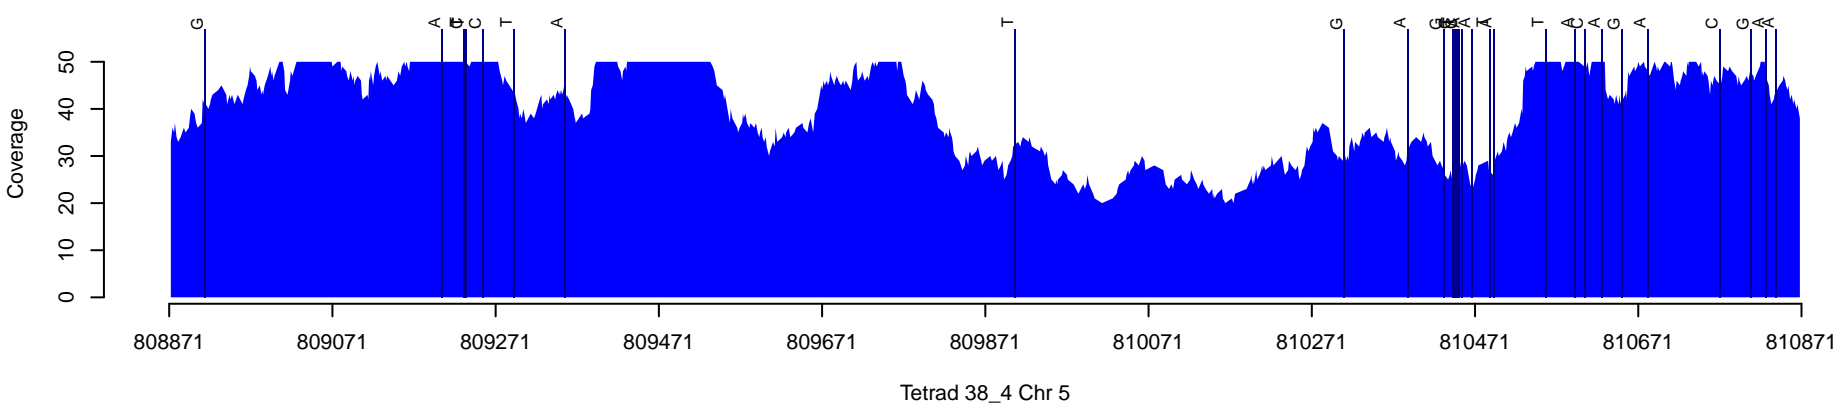

# ID21

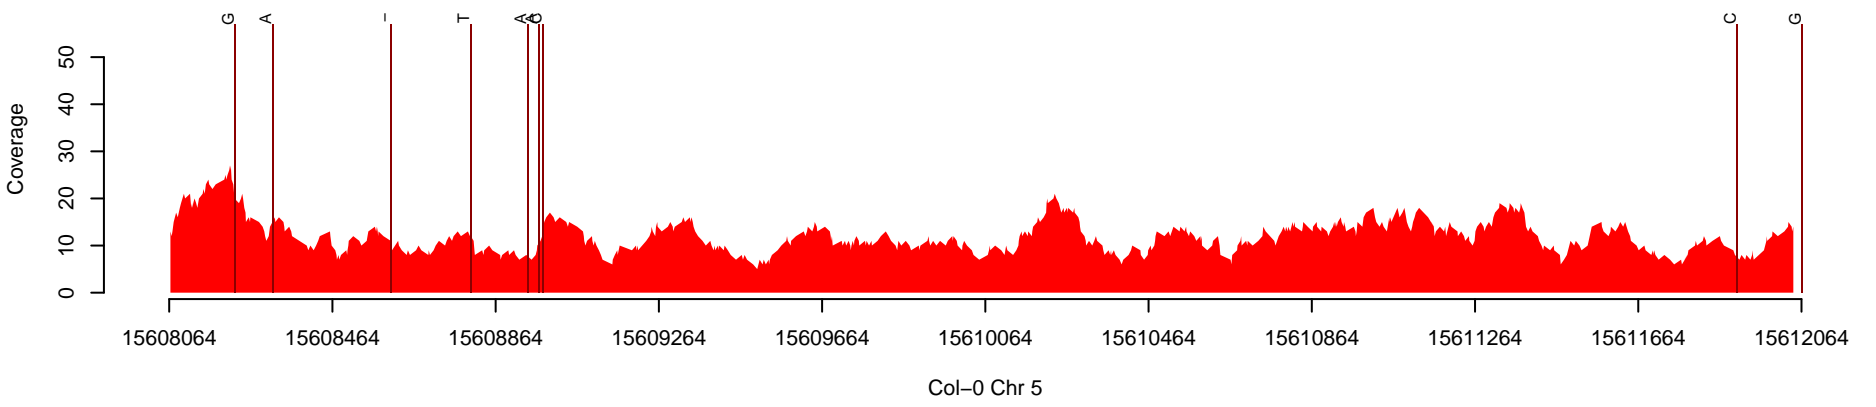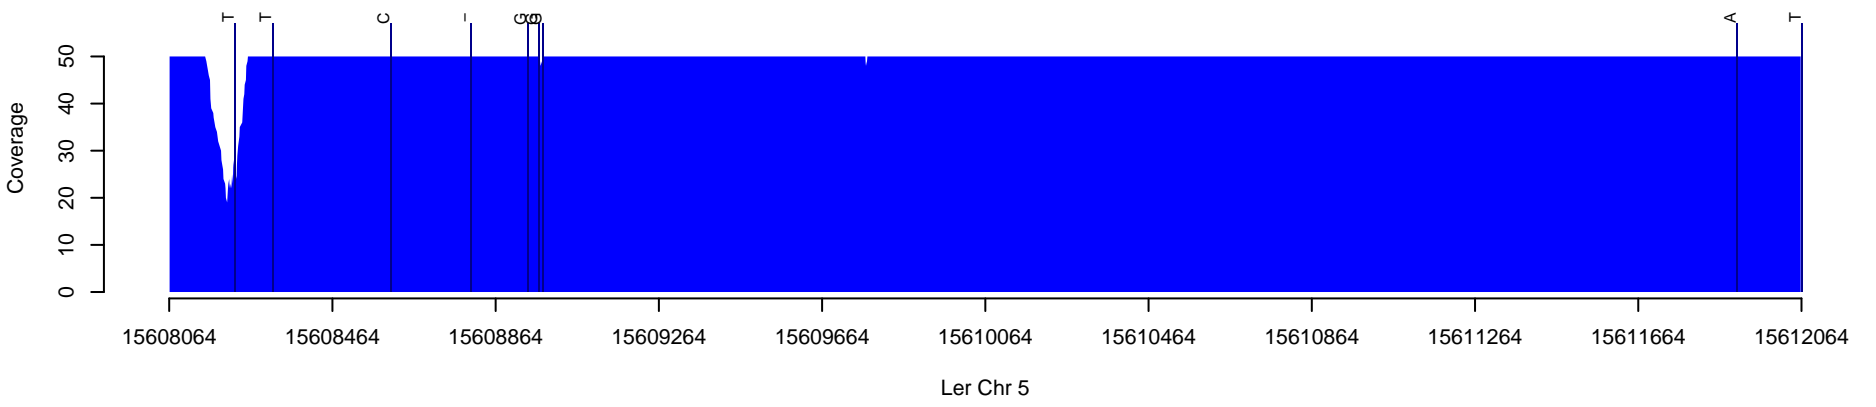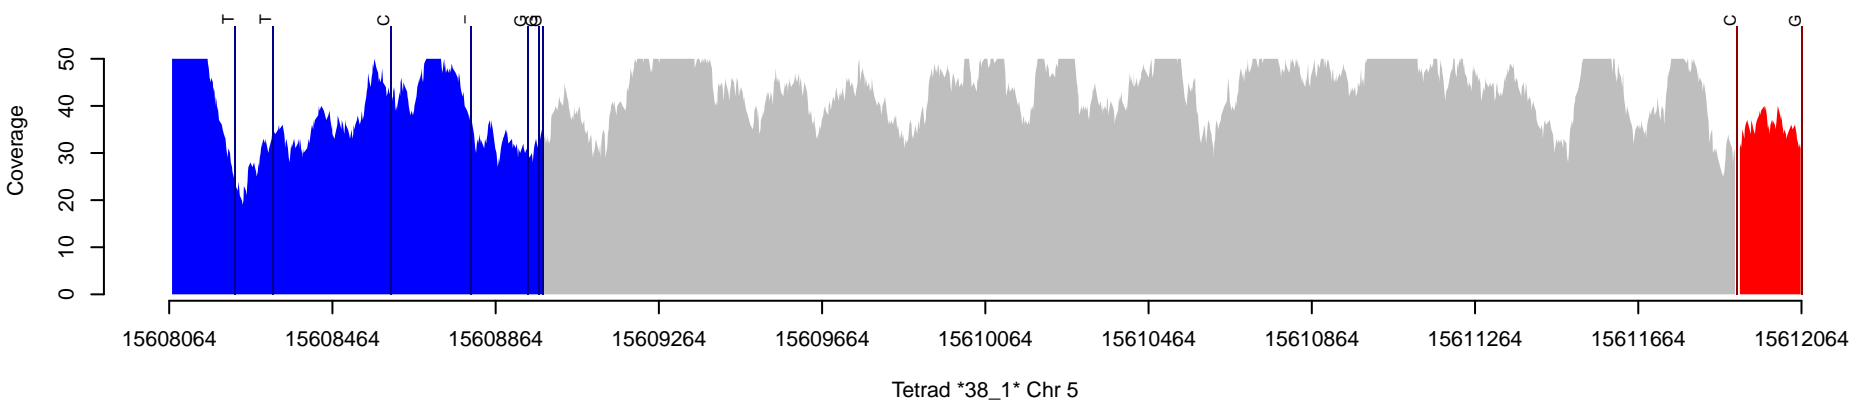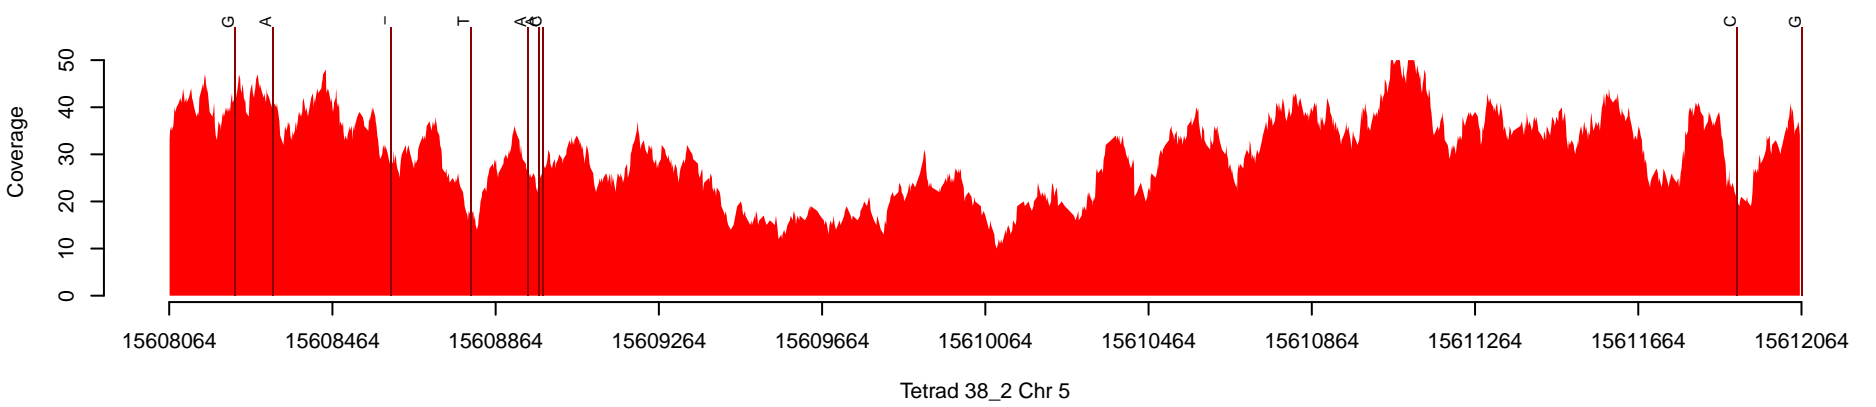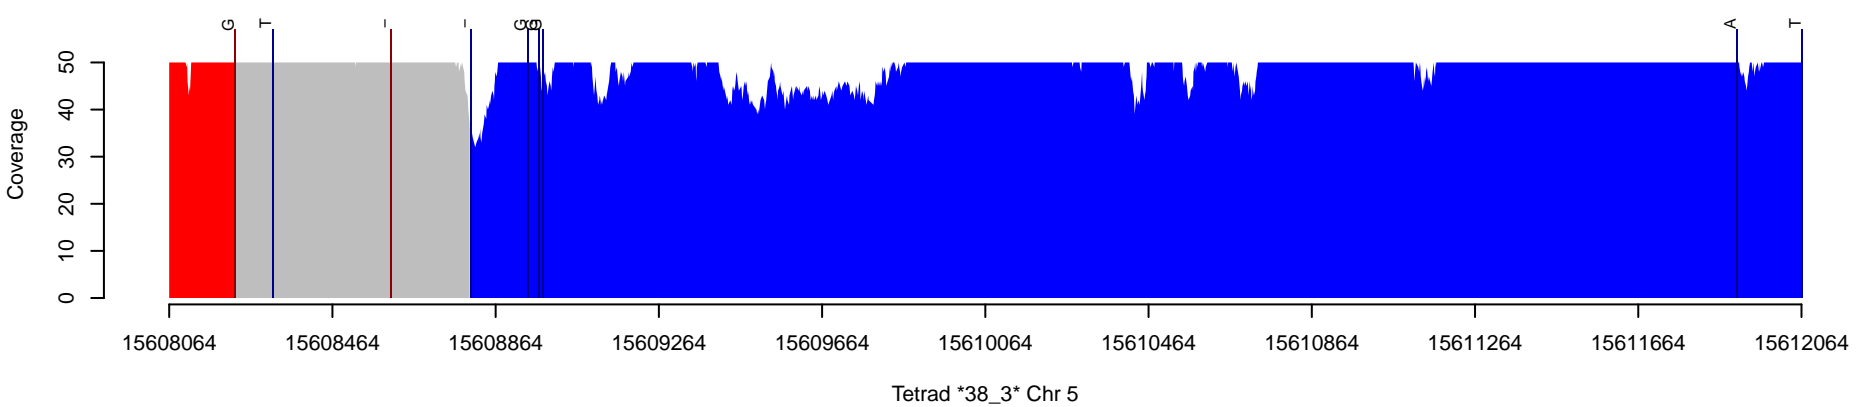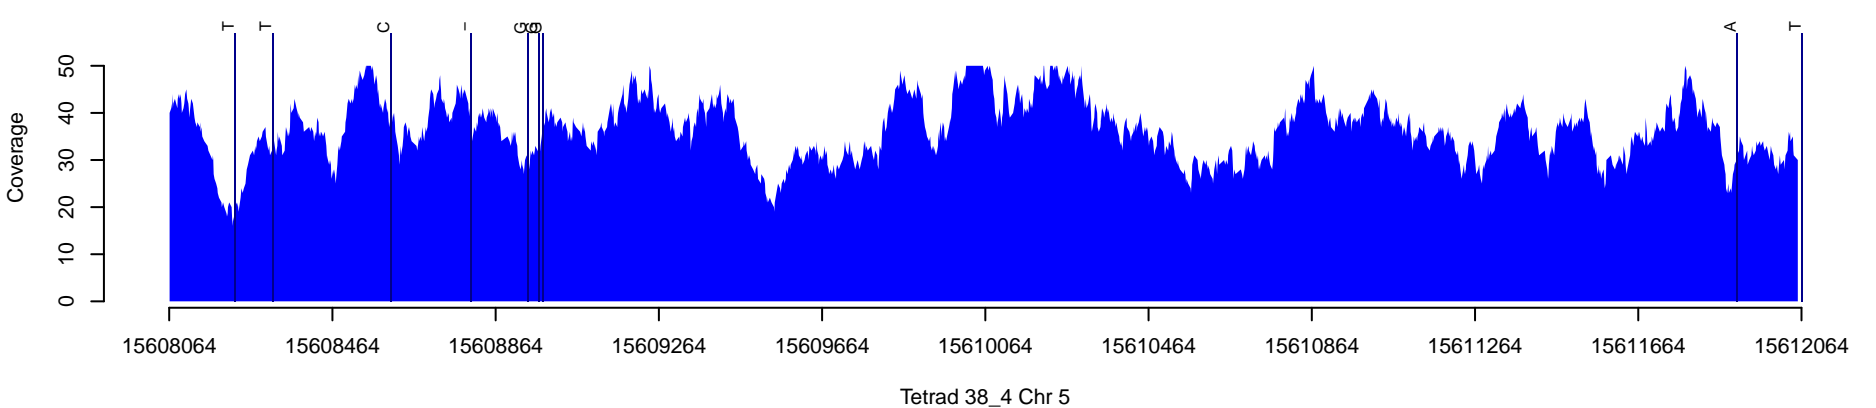

# ID22

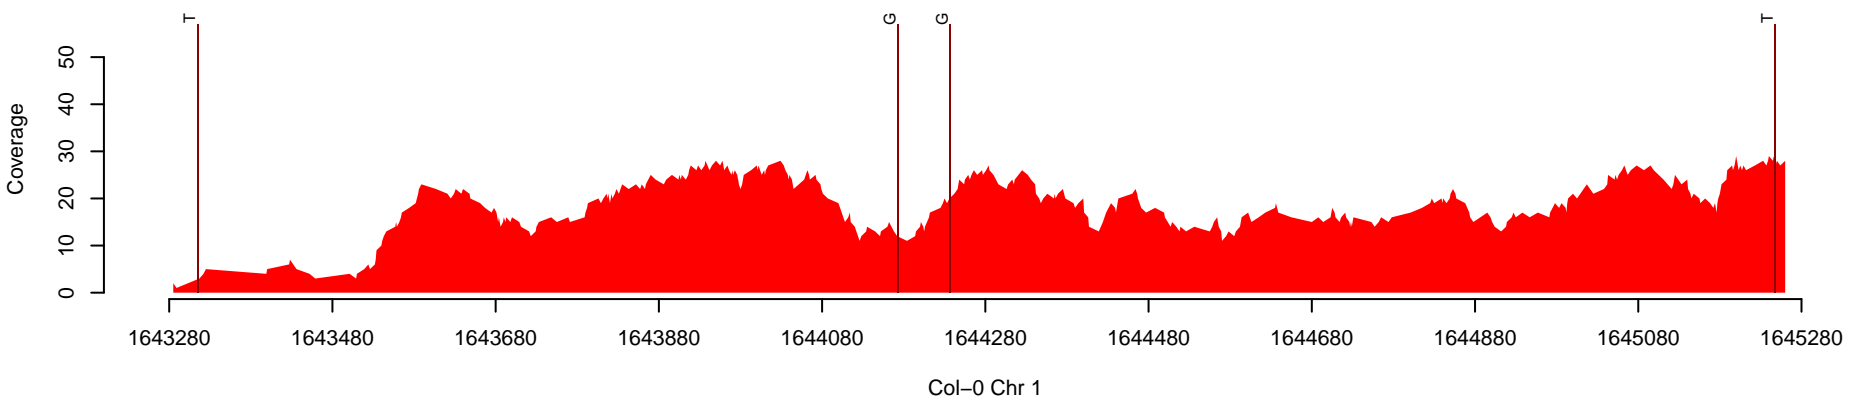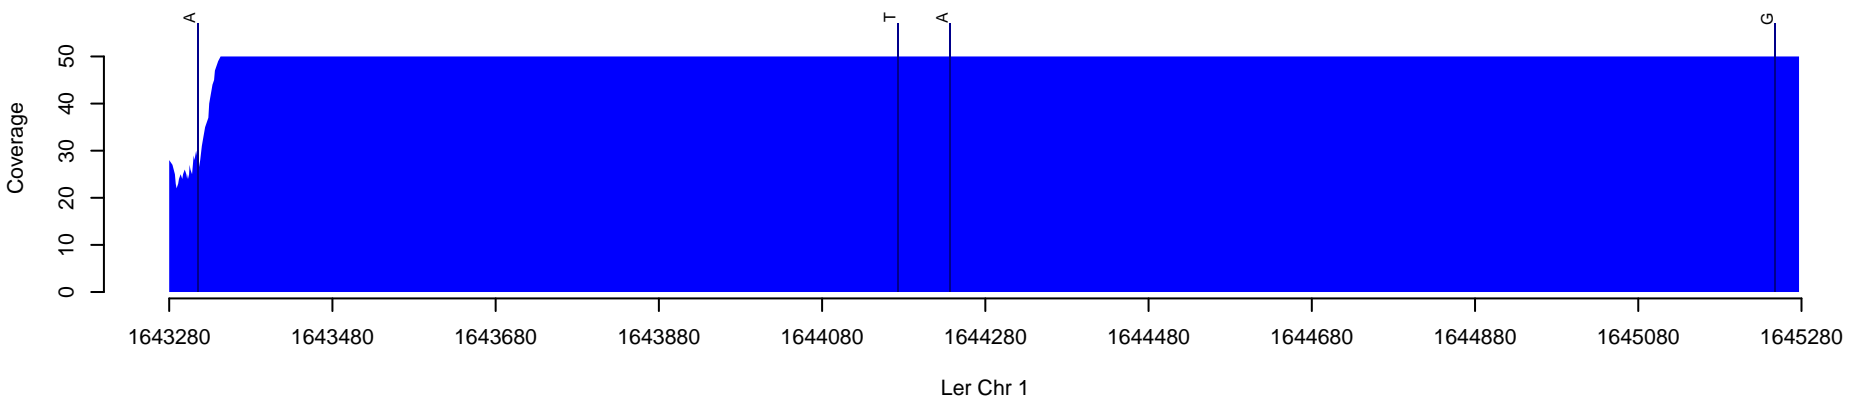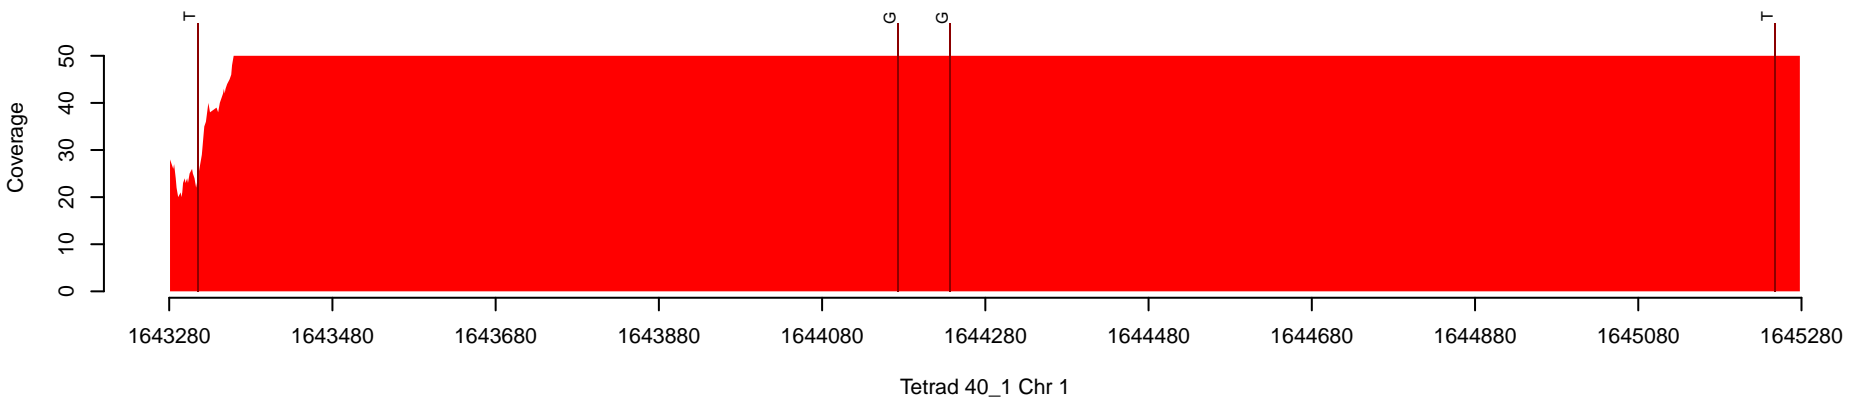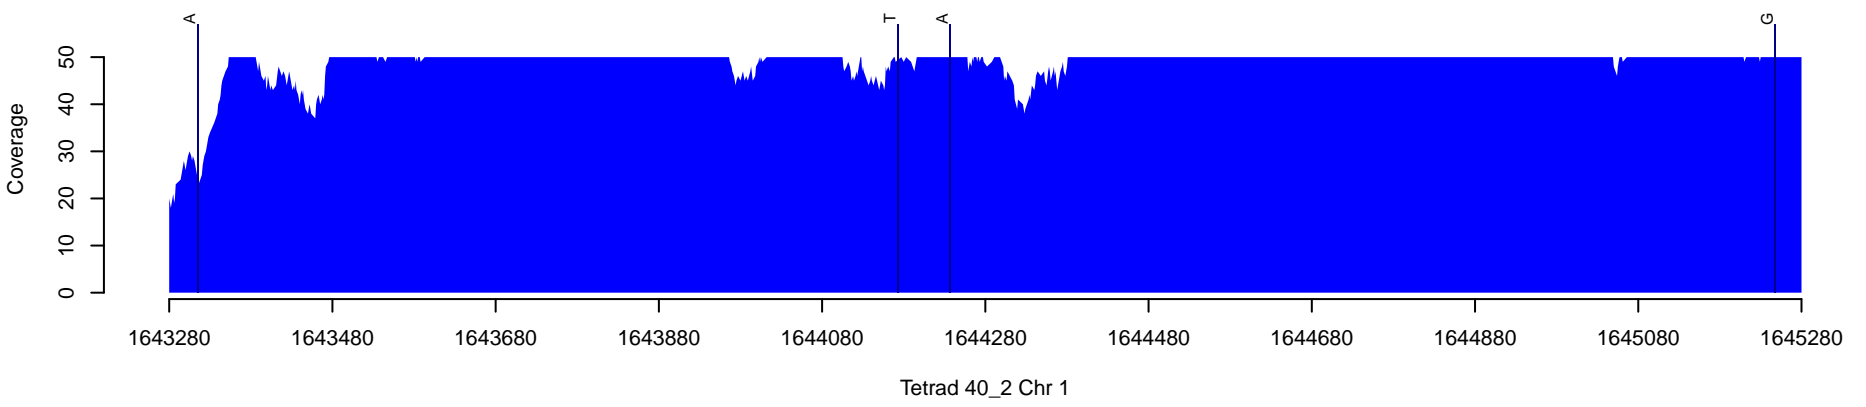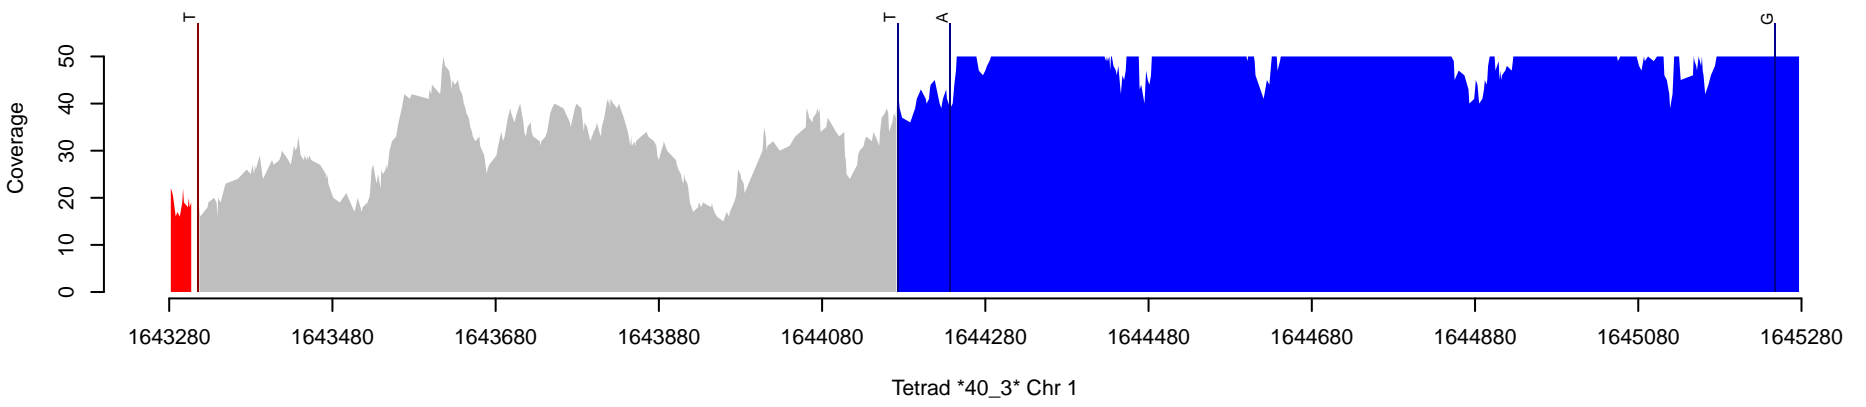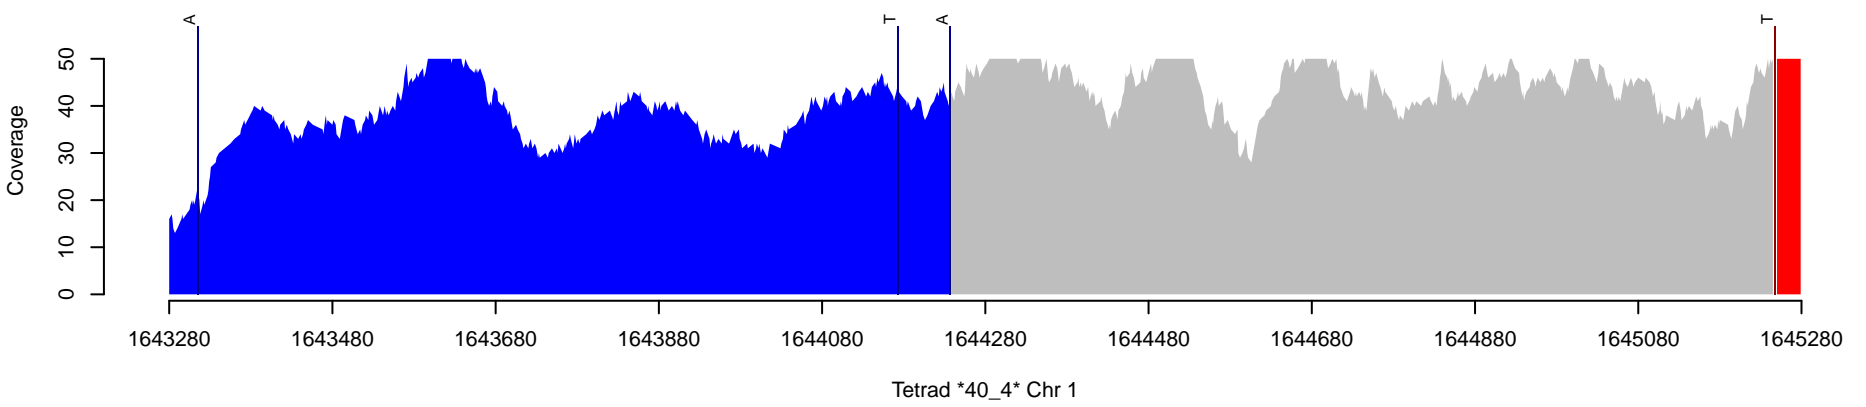

### ID23

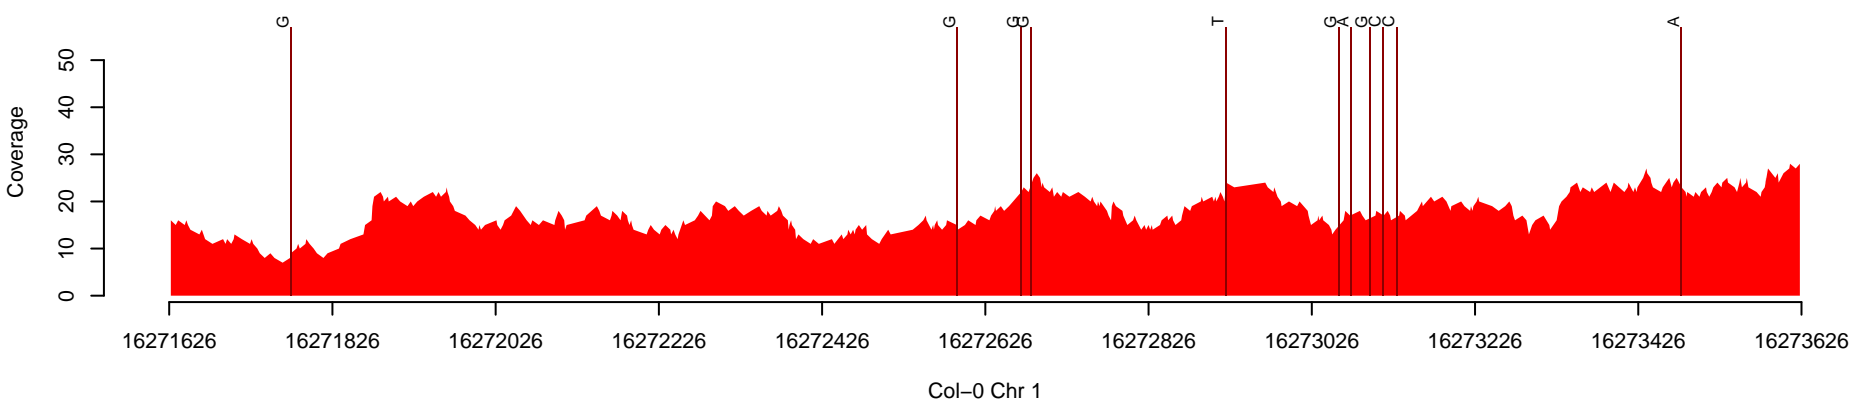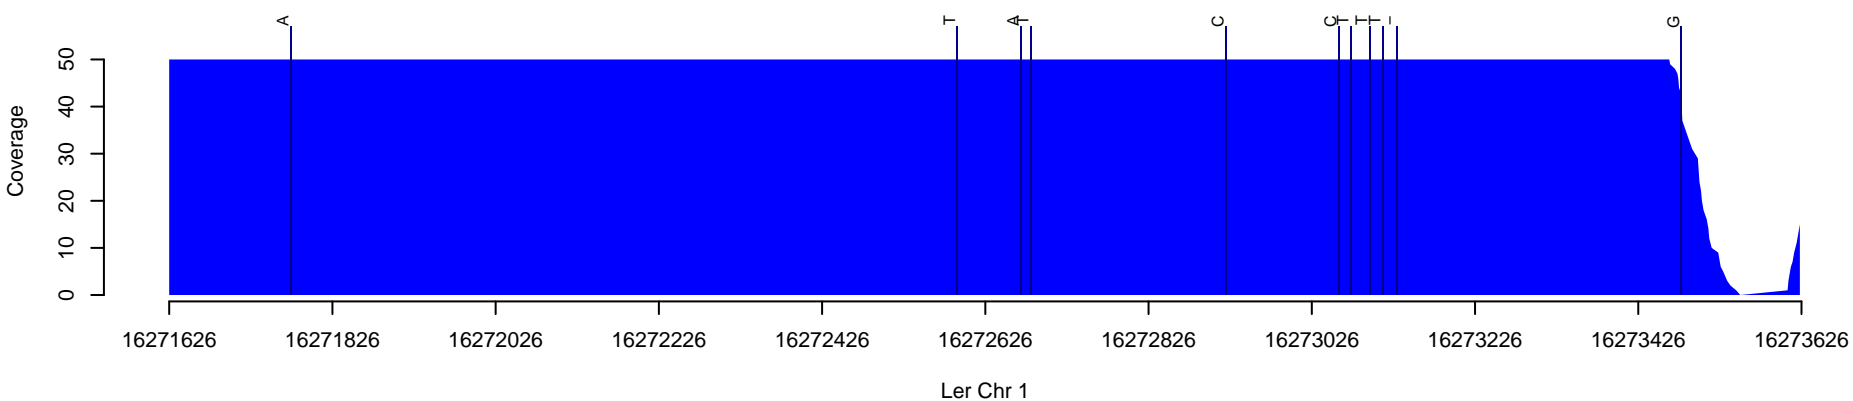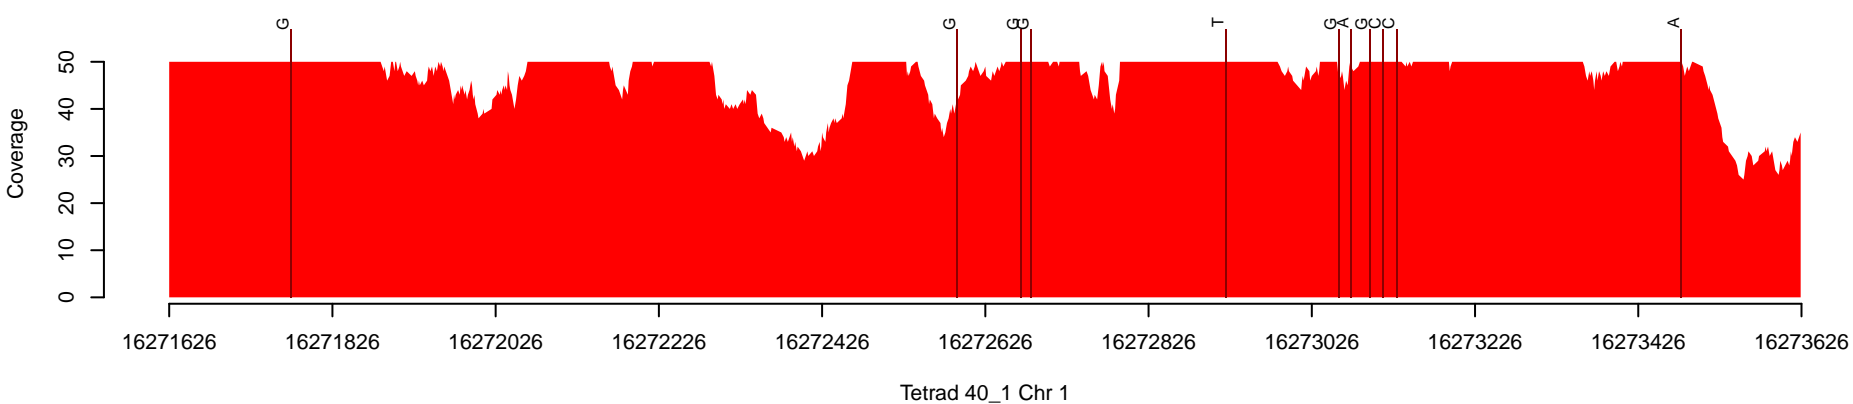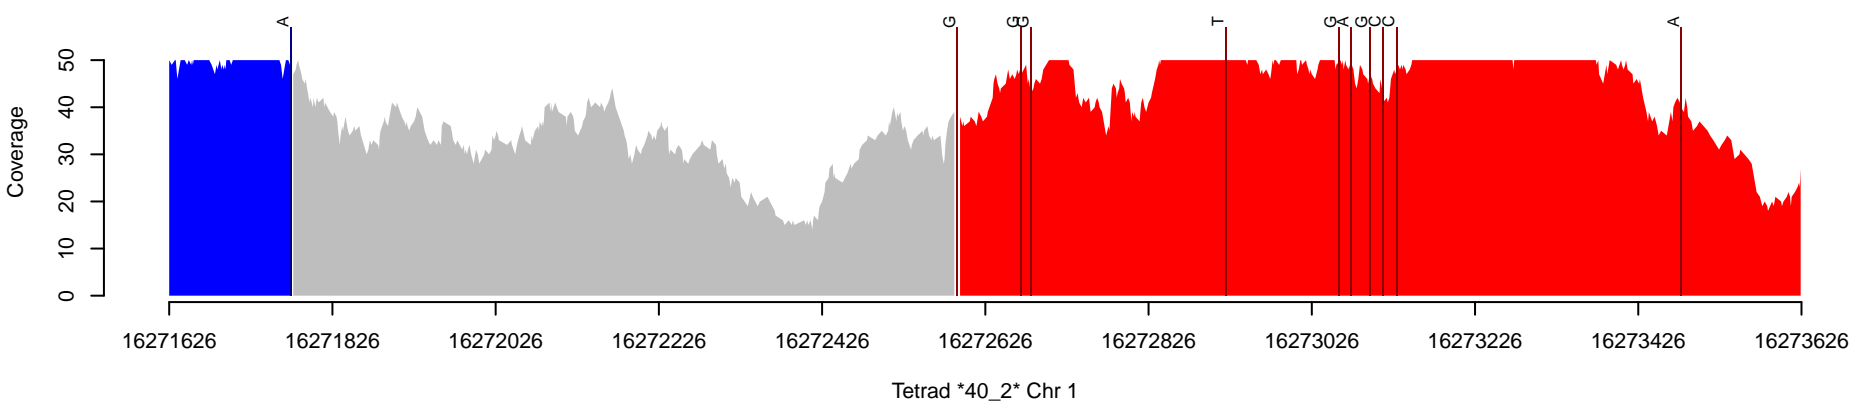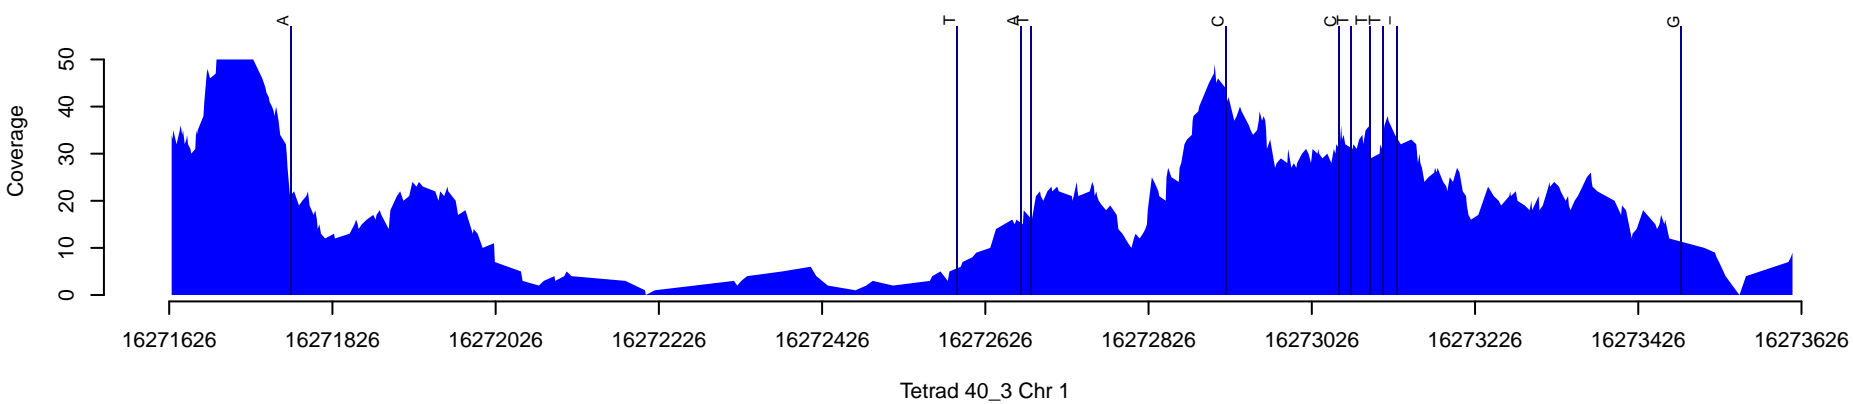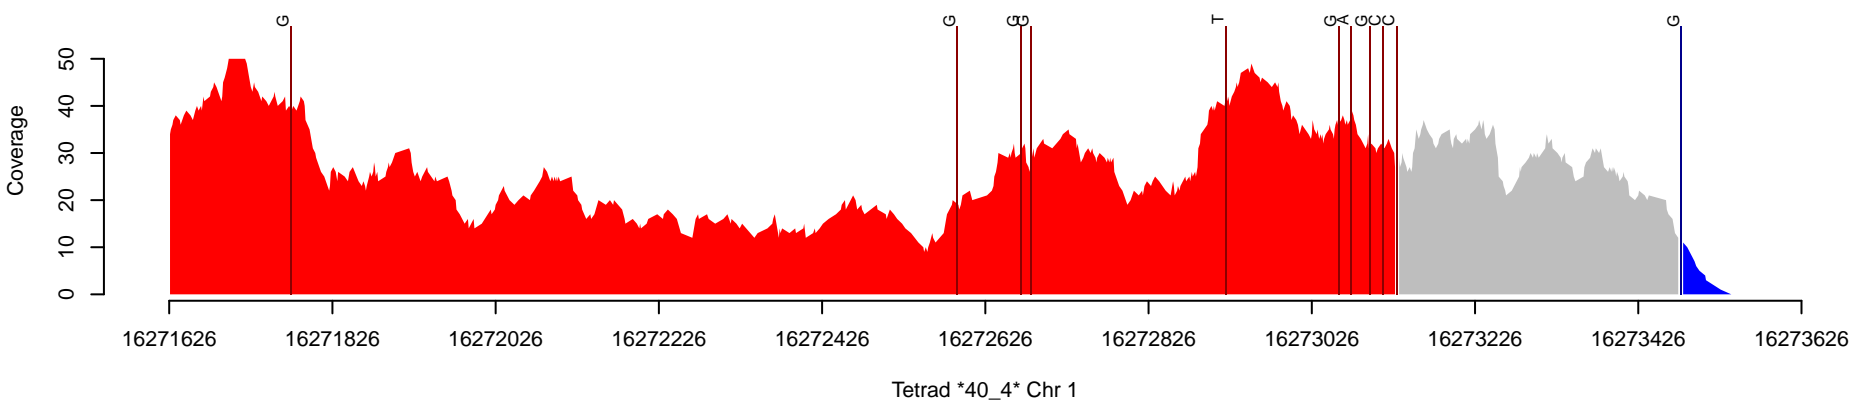

# ID24

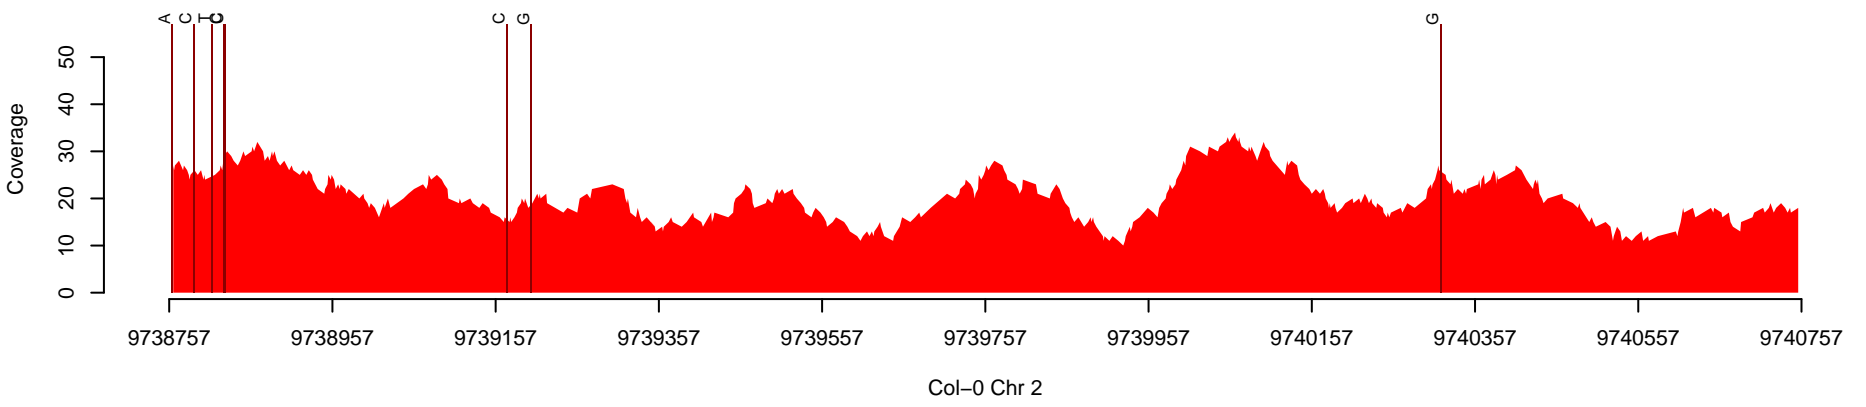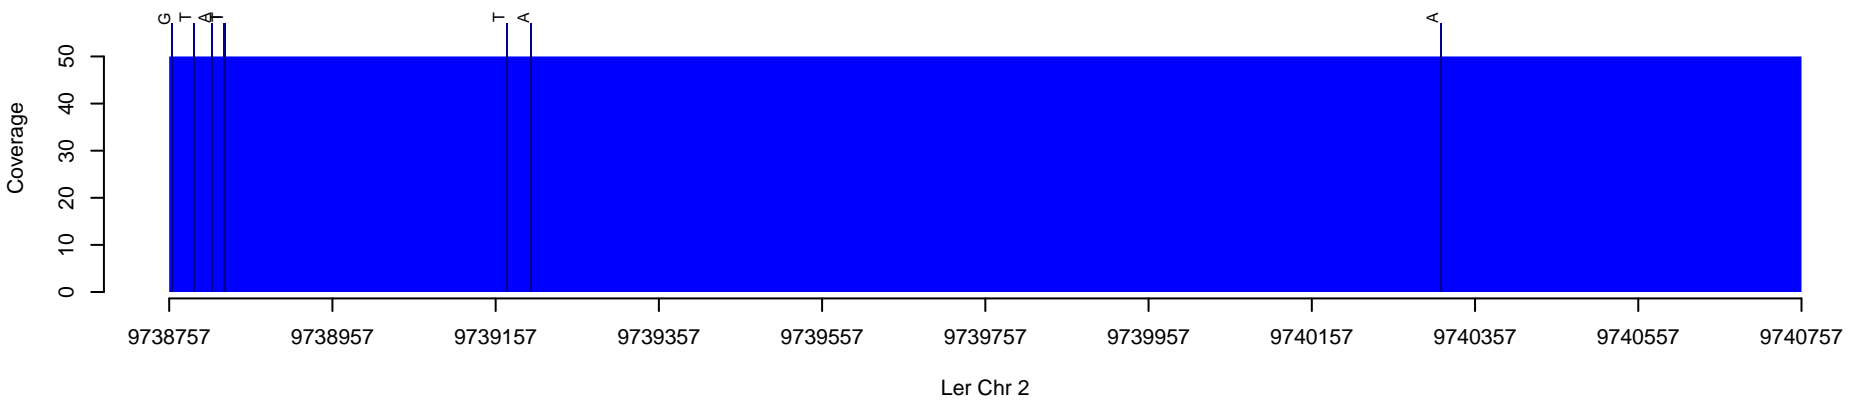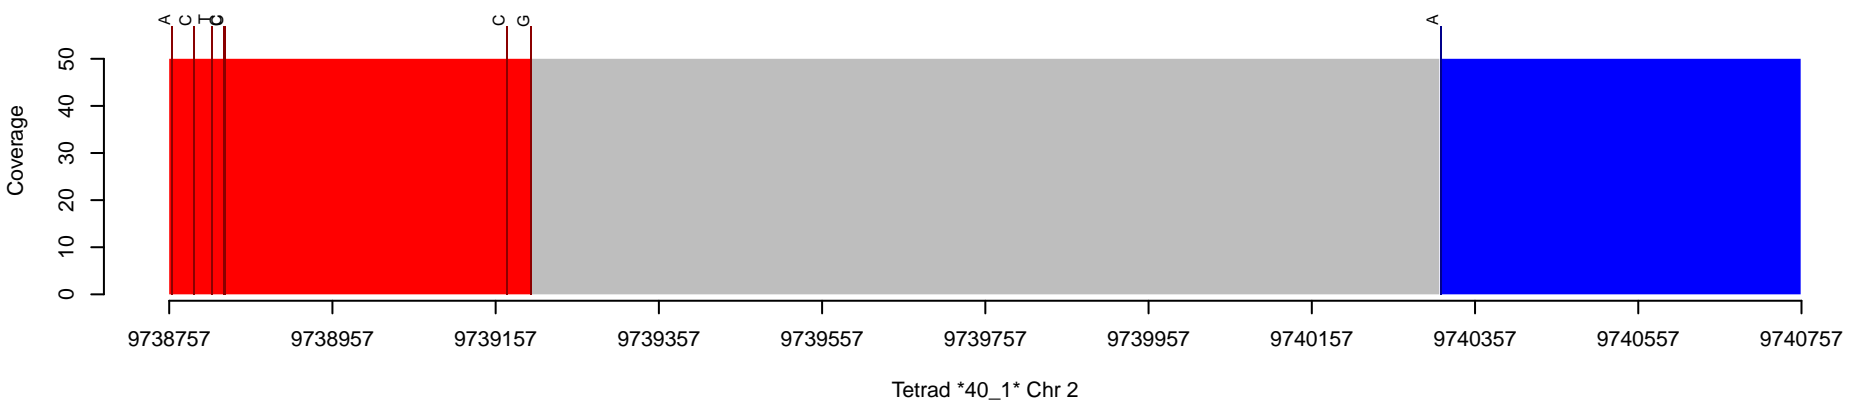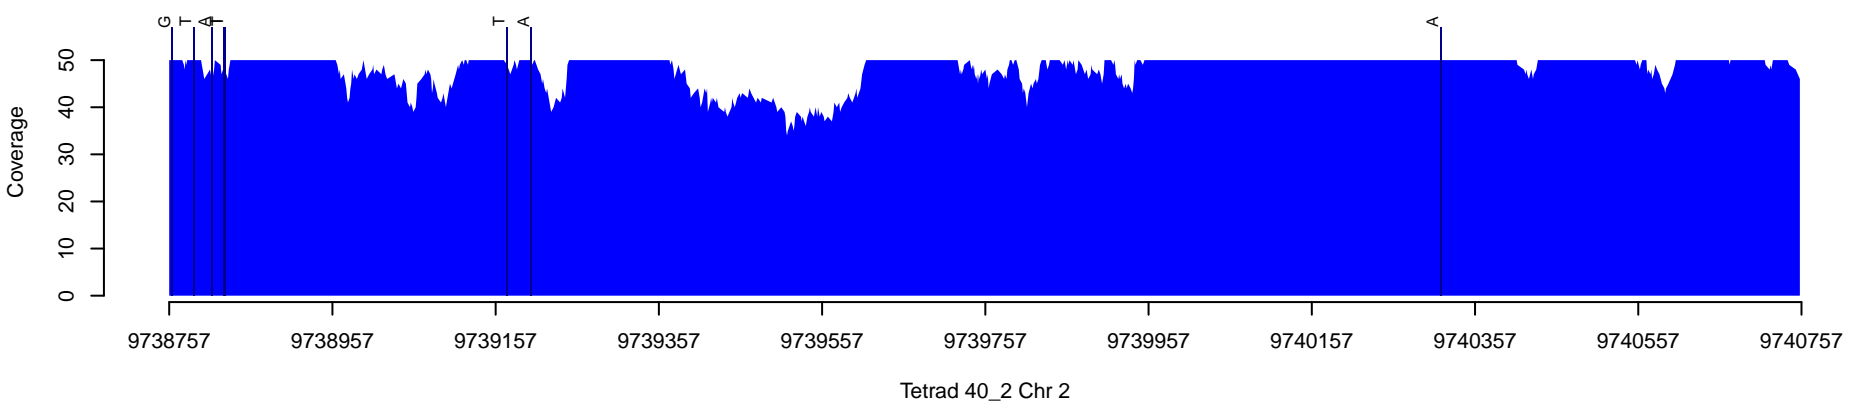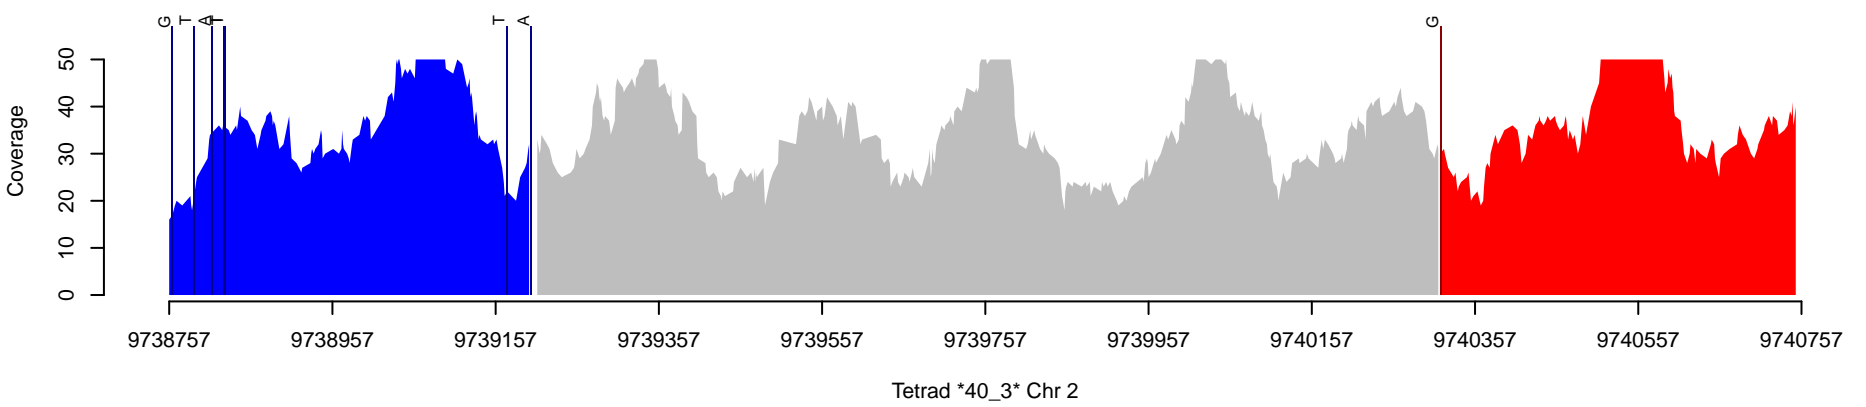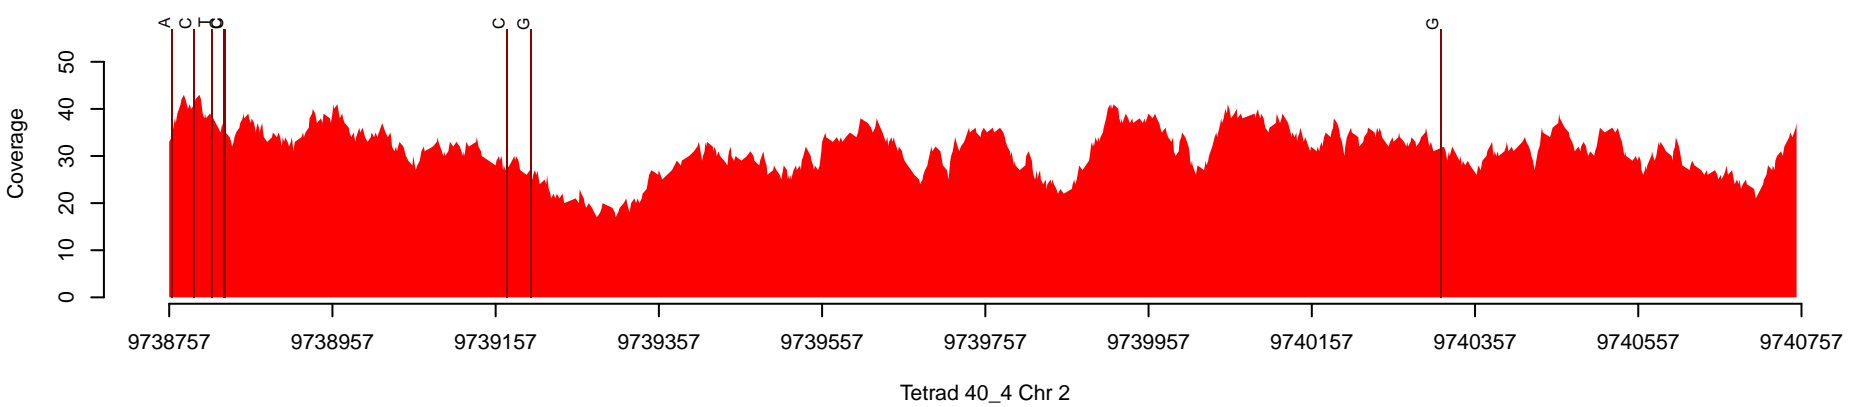



# ID25

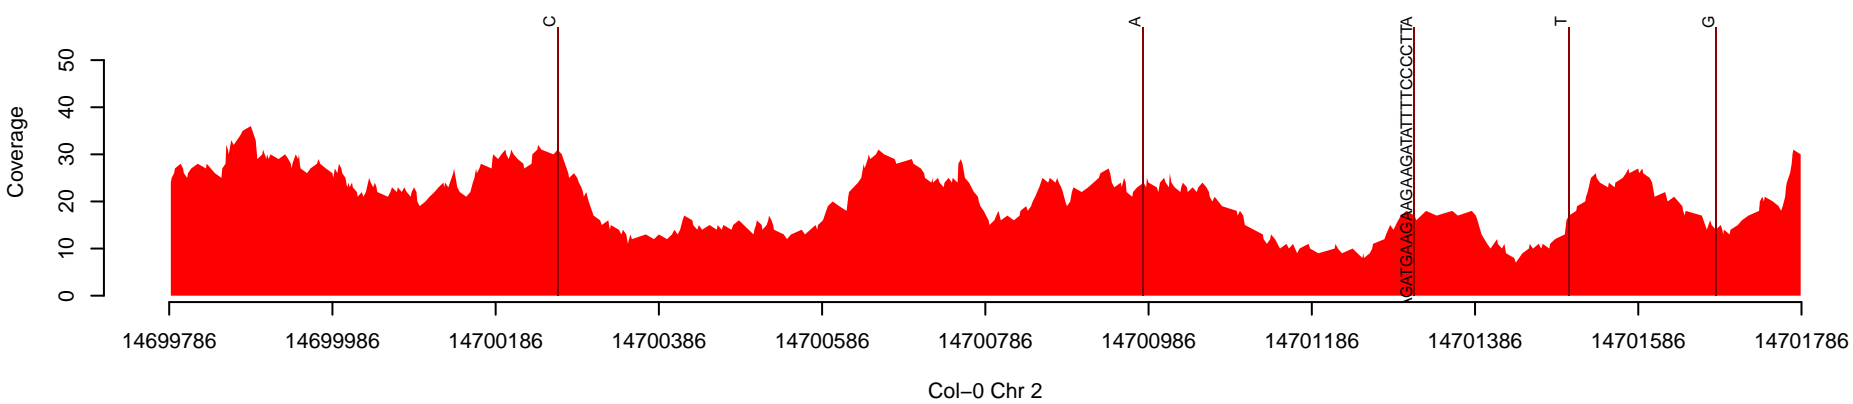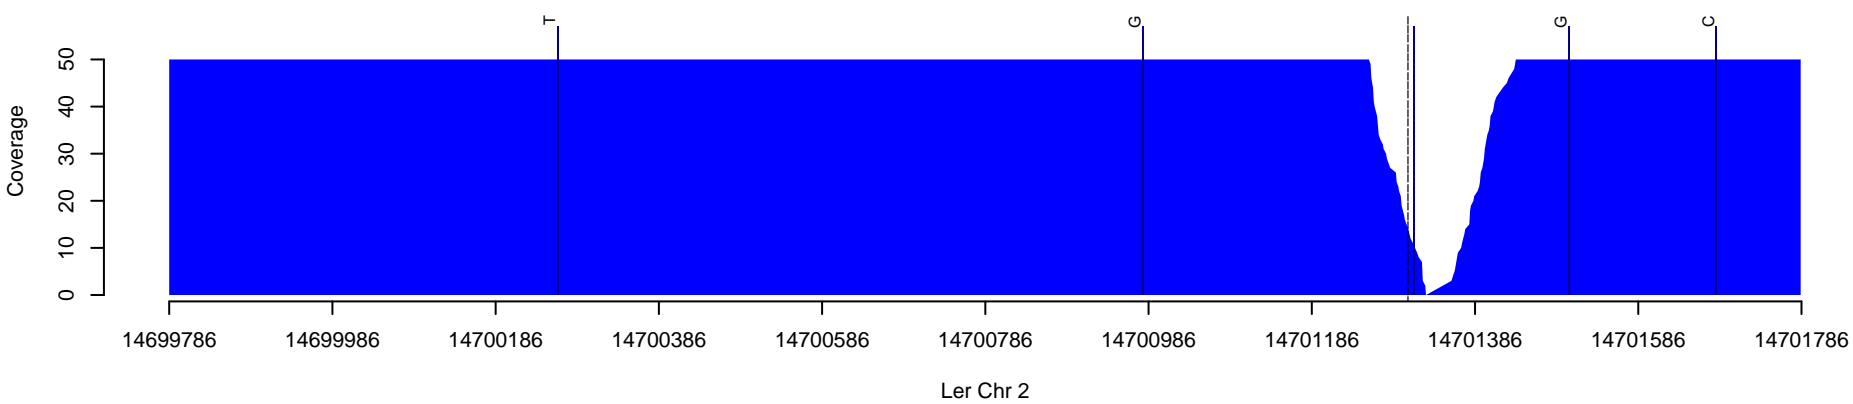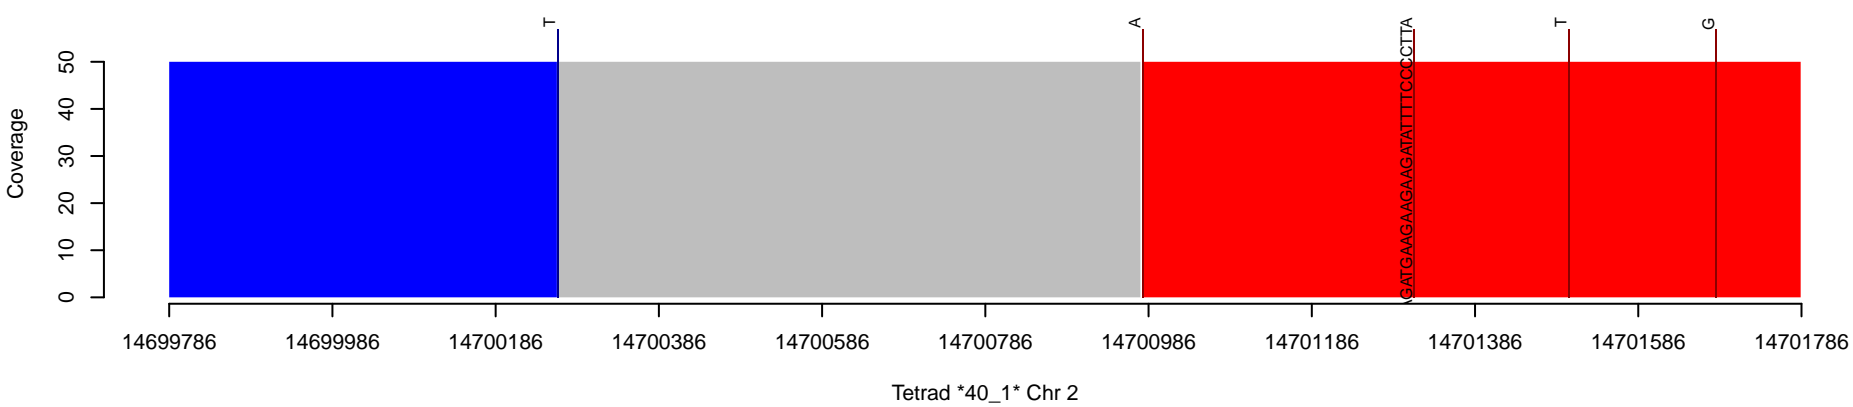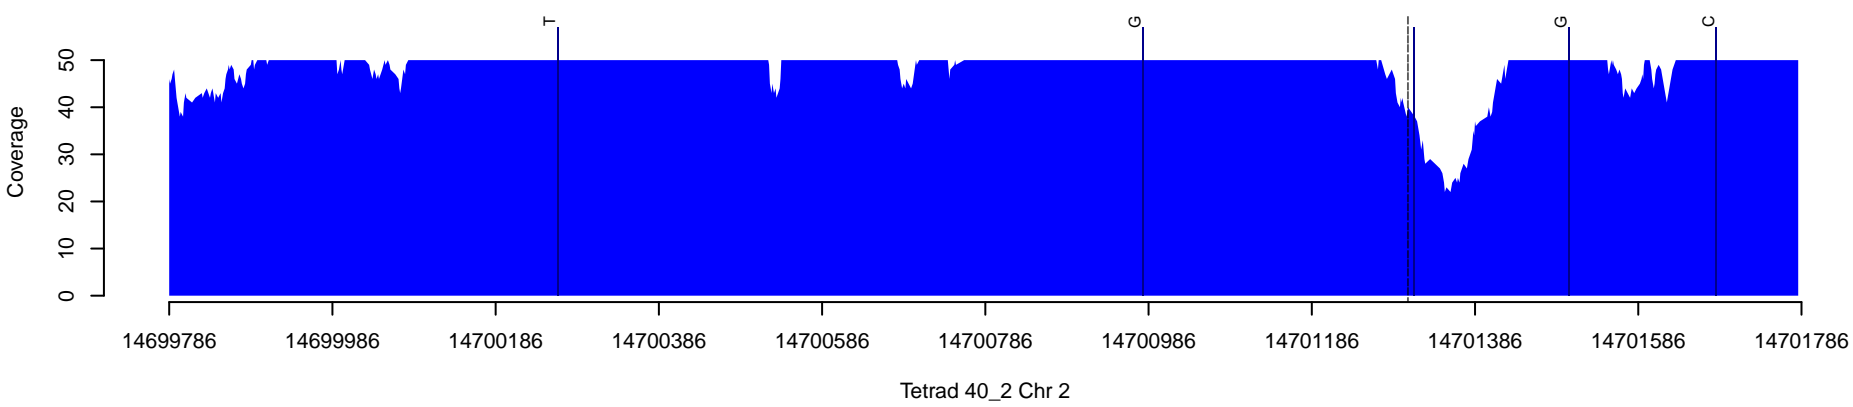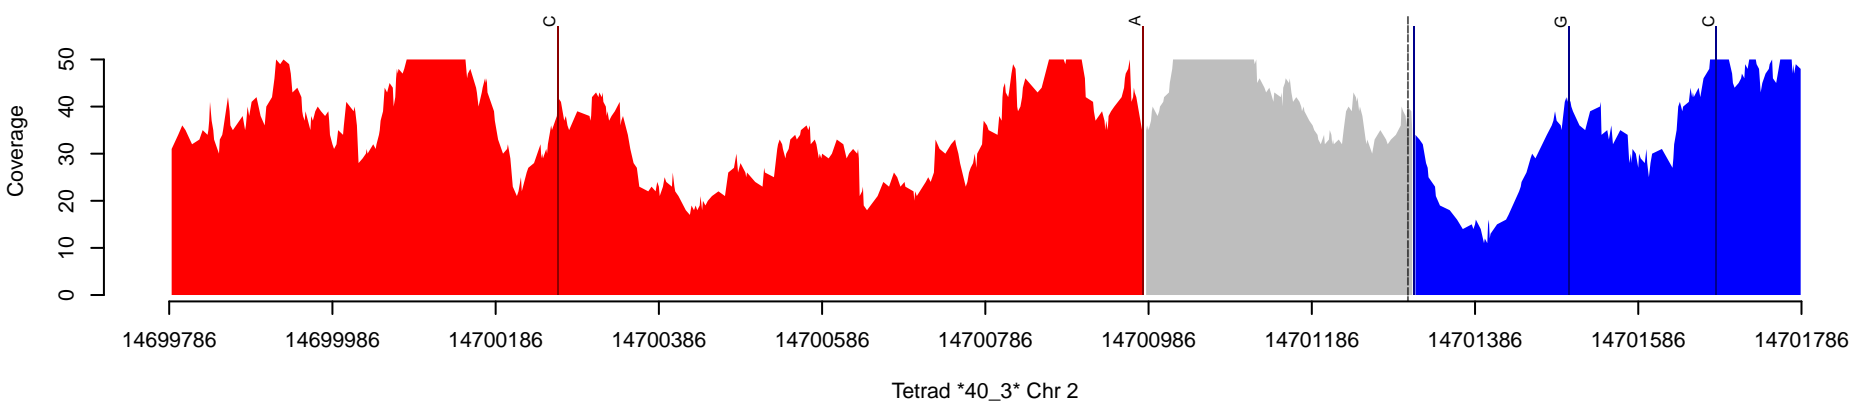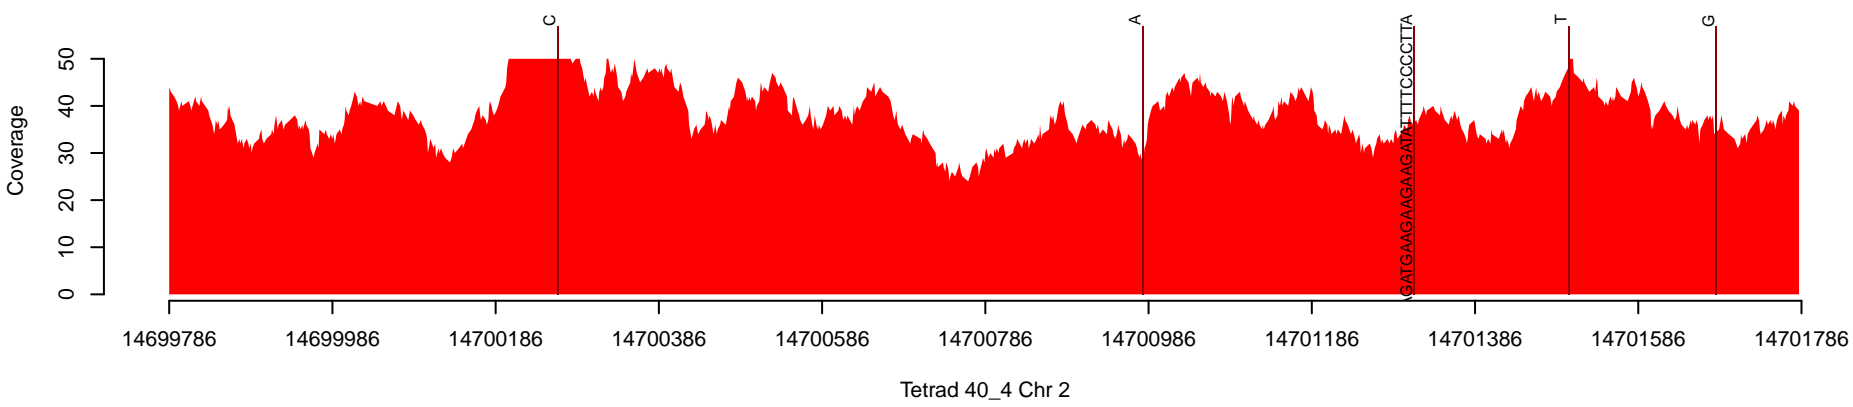

### ID26

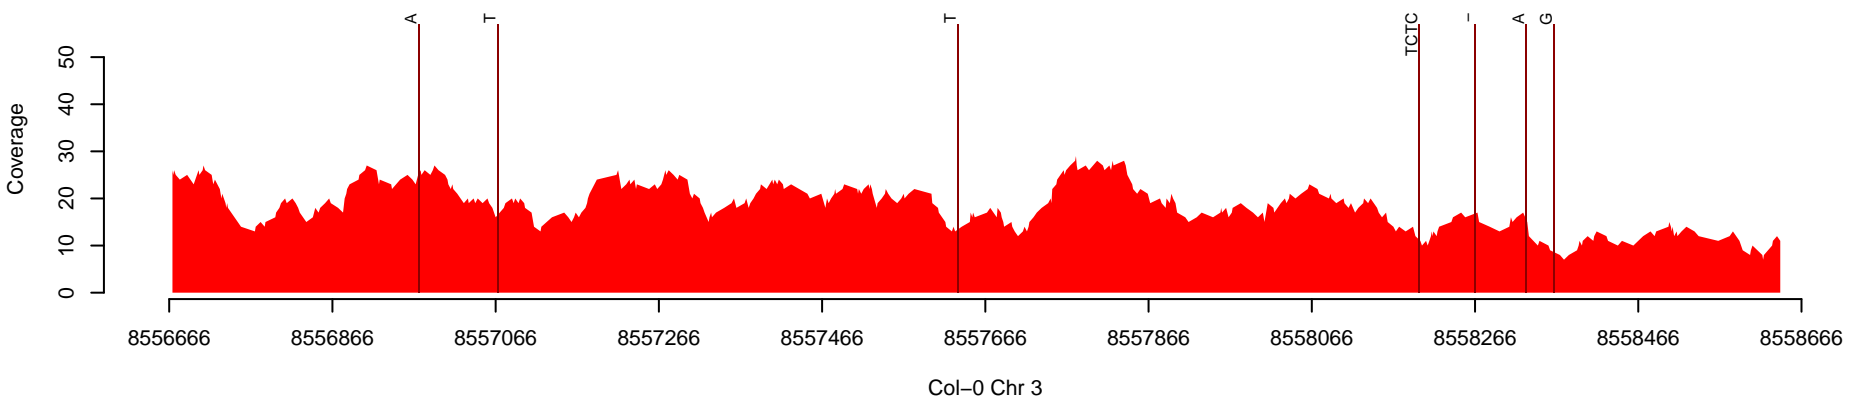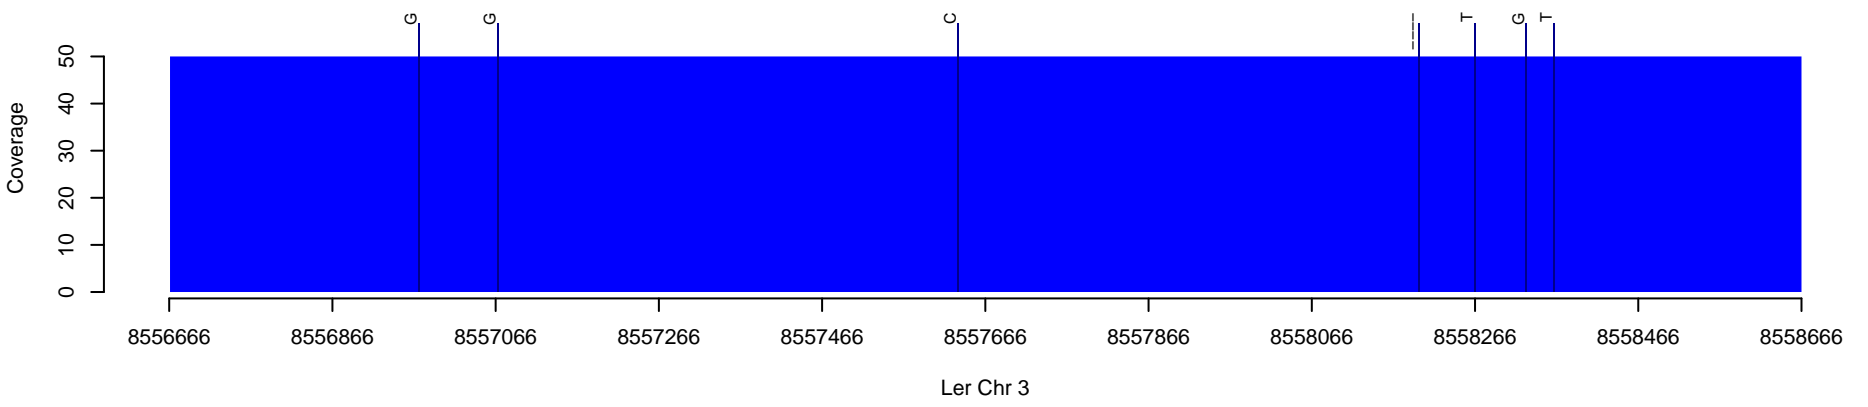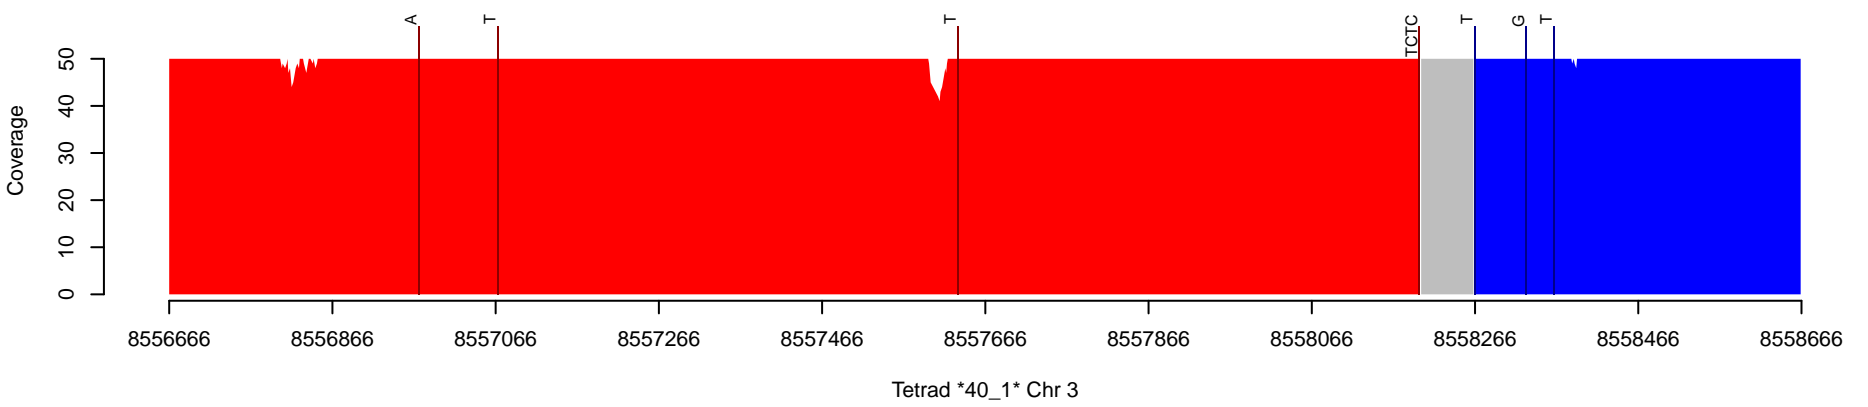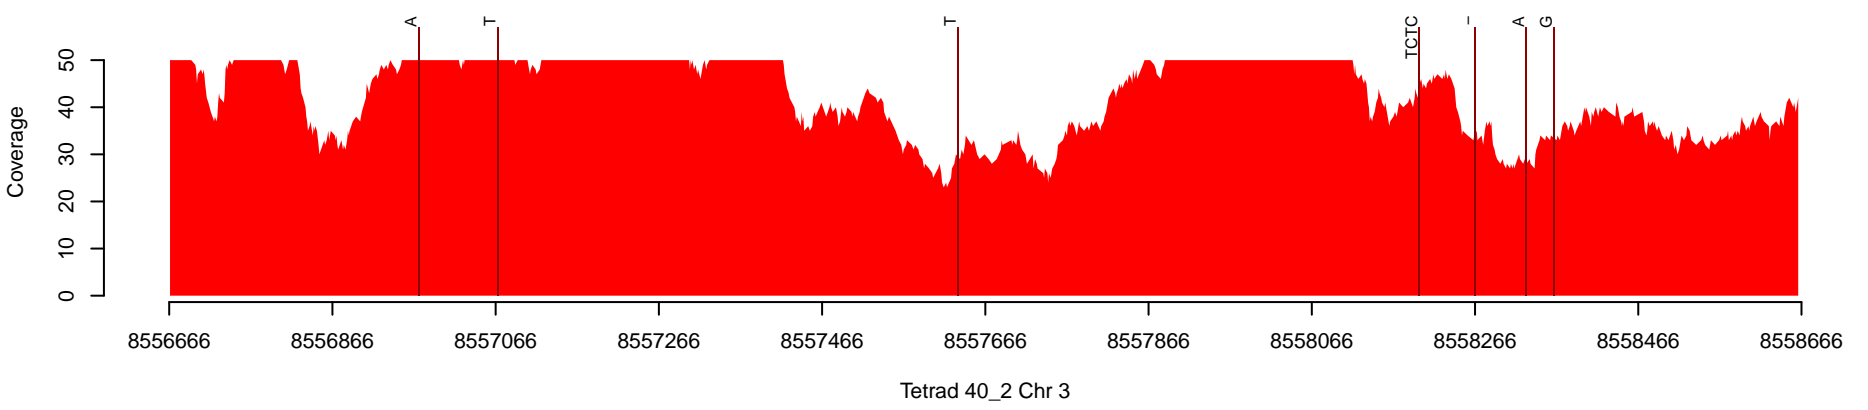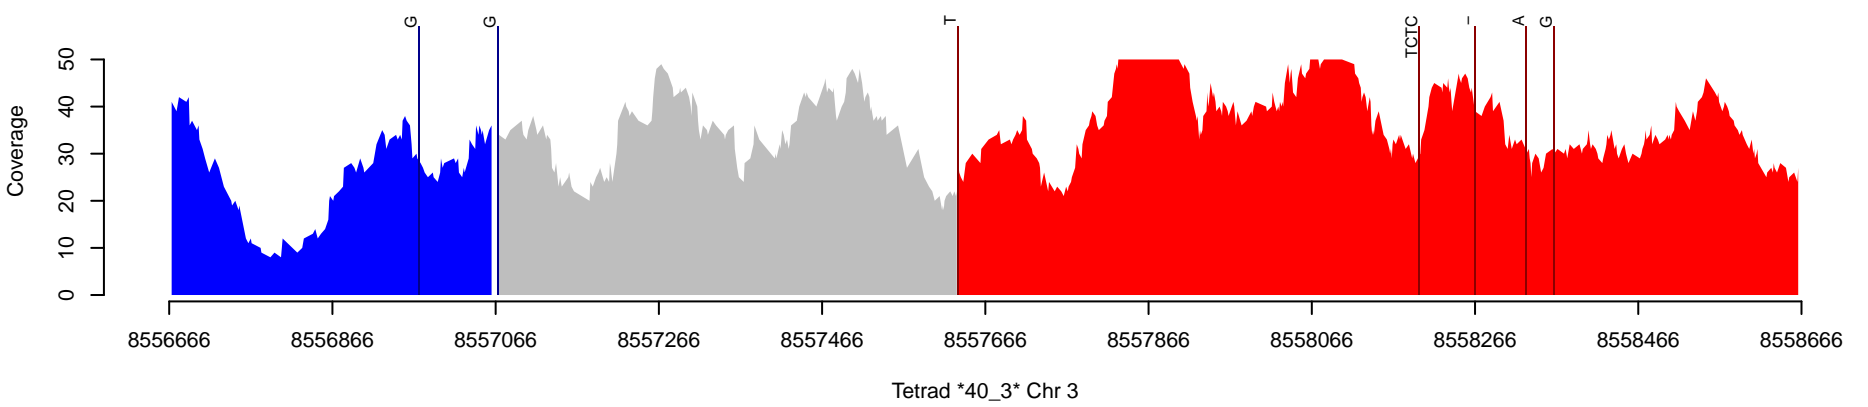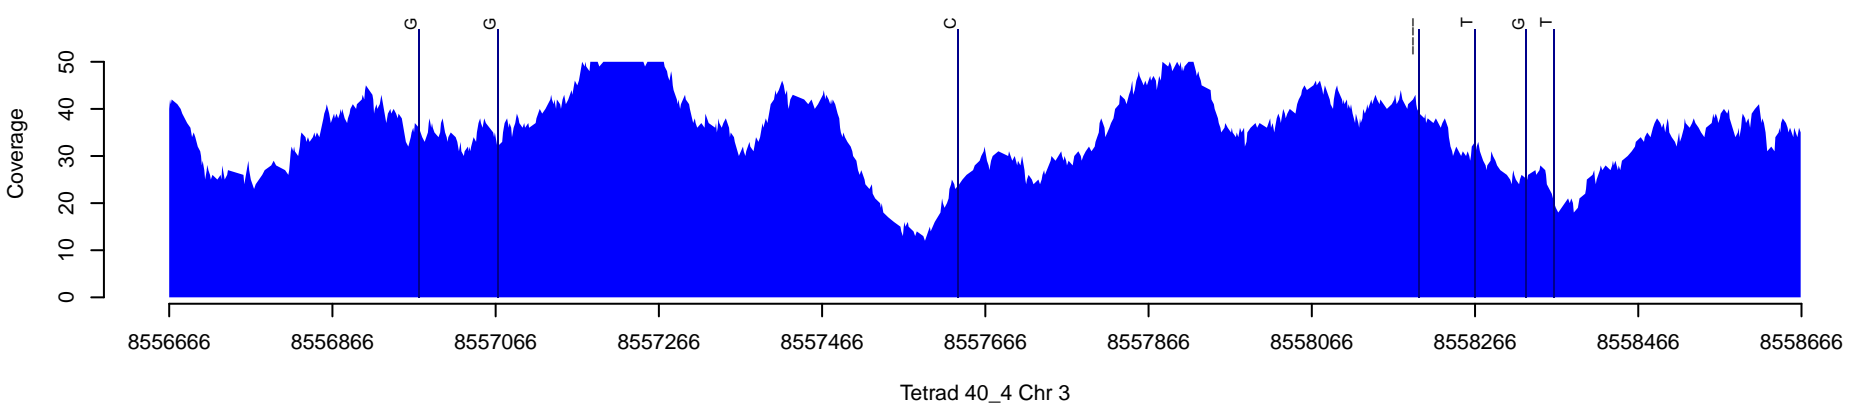

# ID27

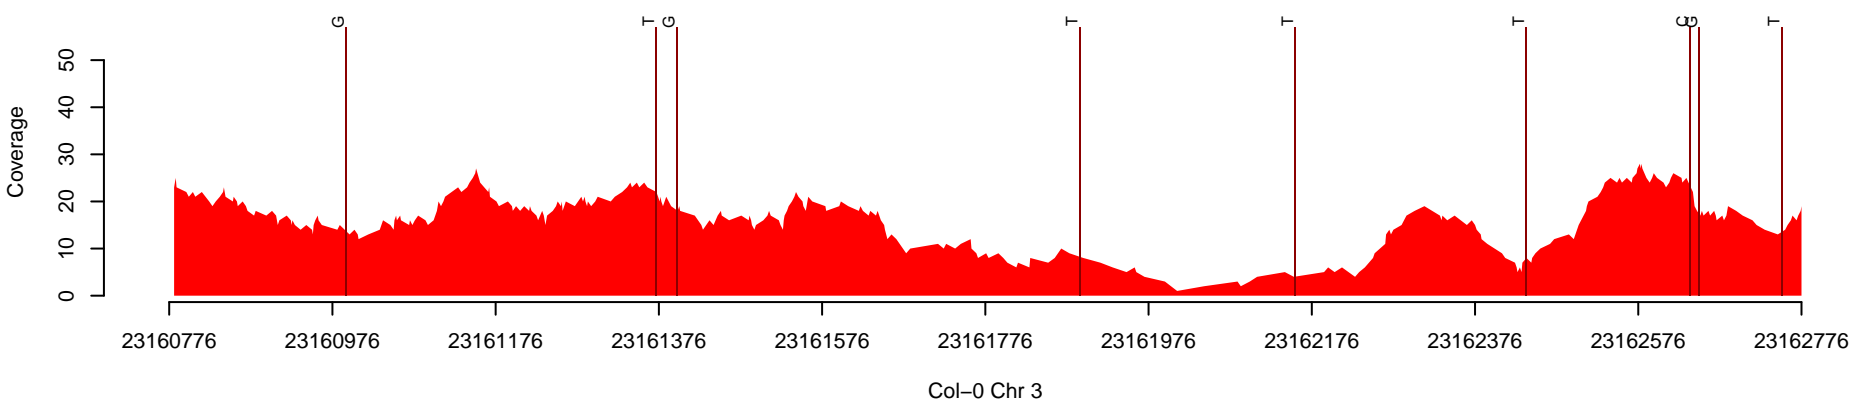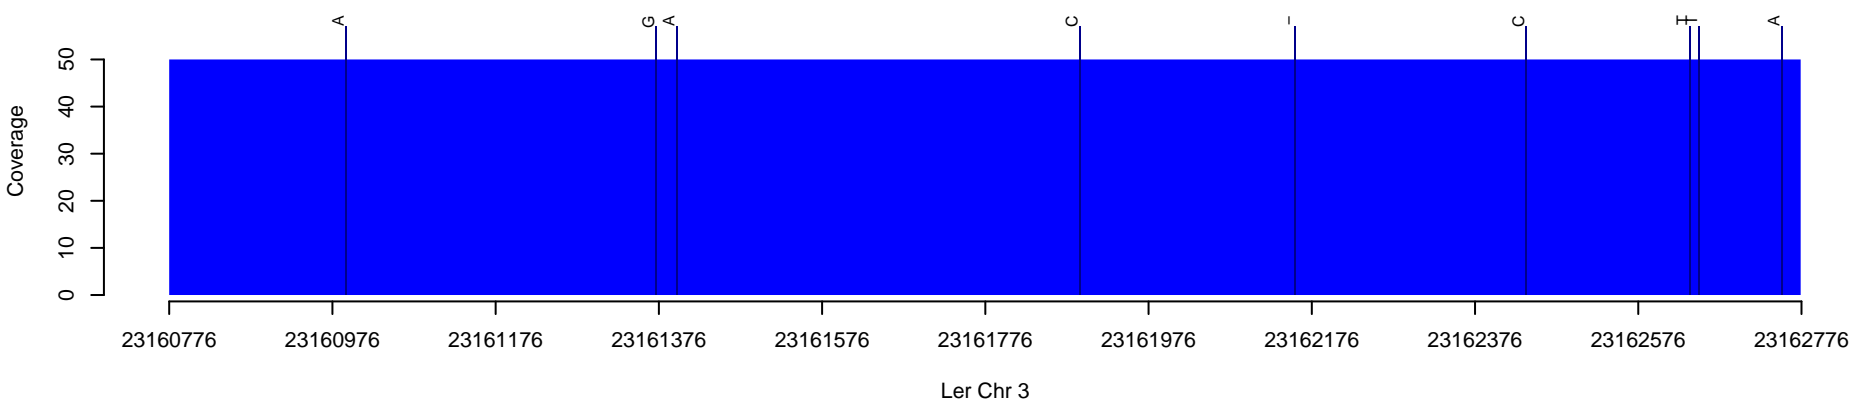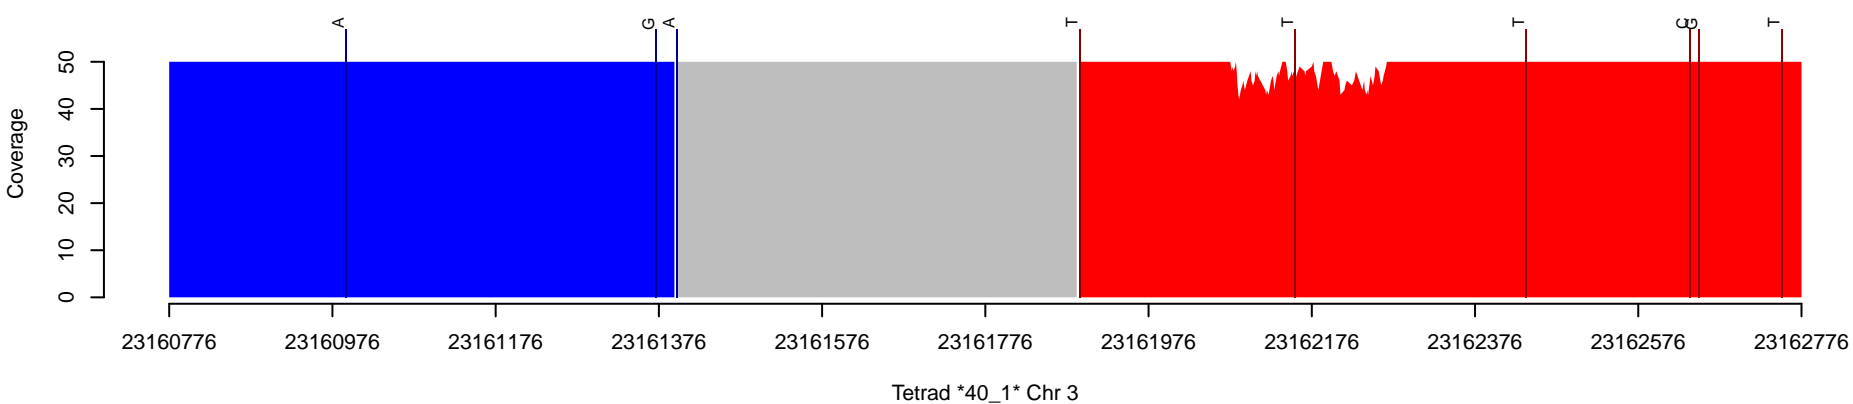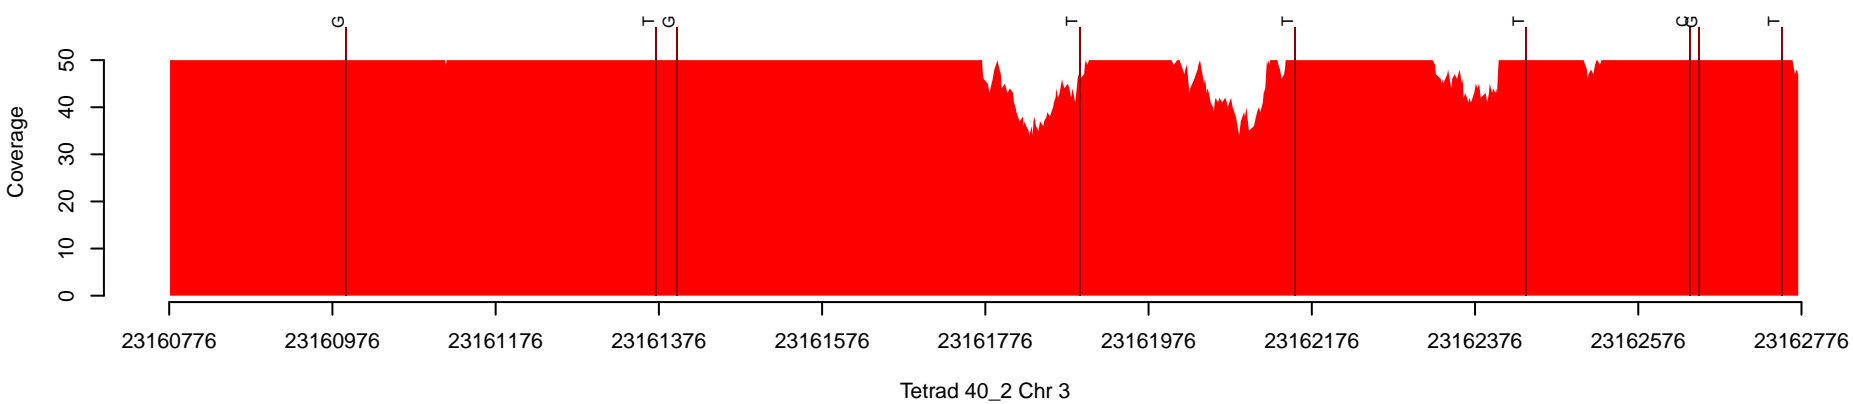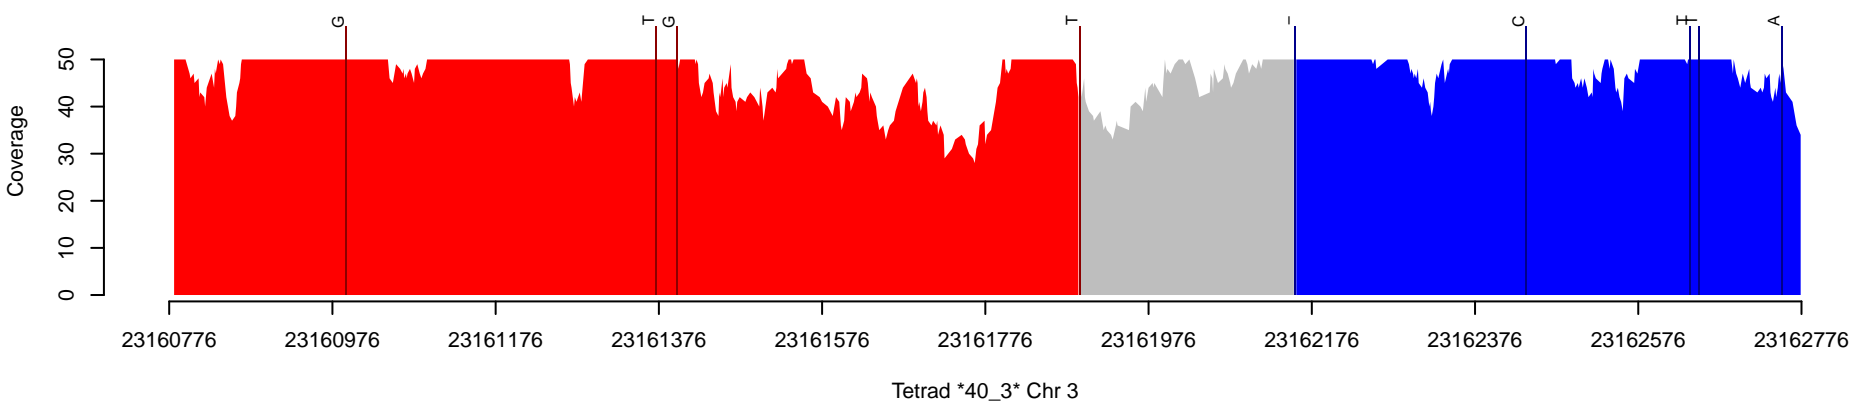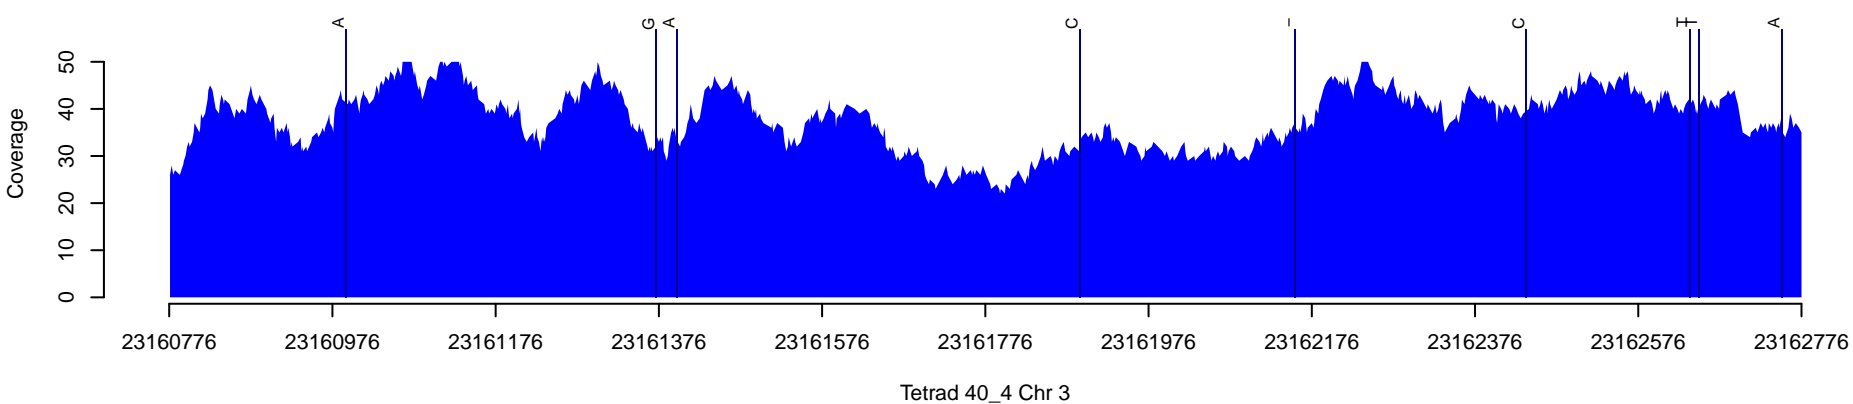

# ID28

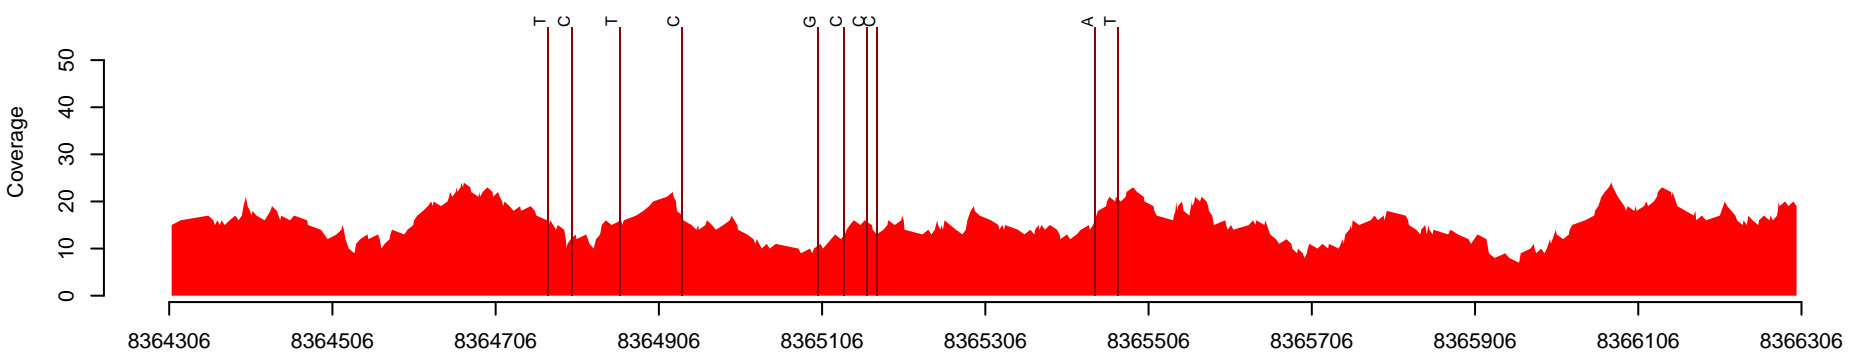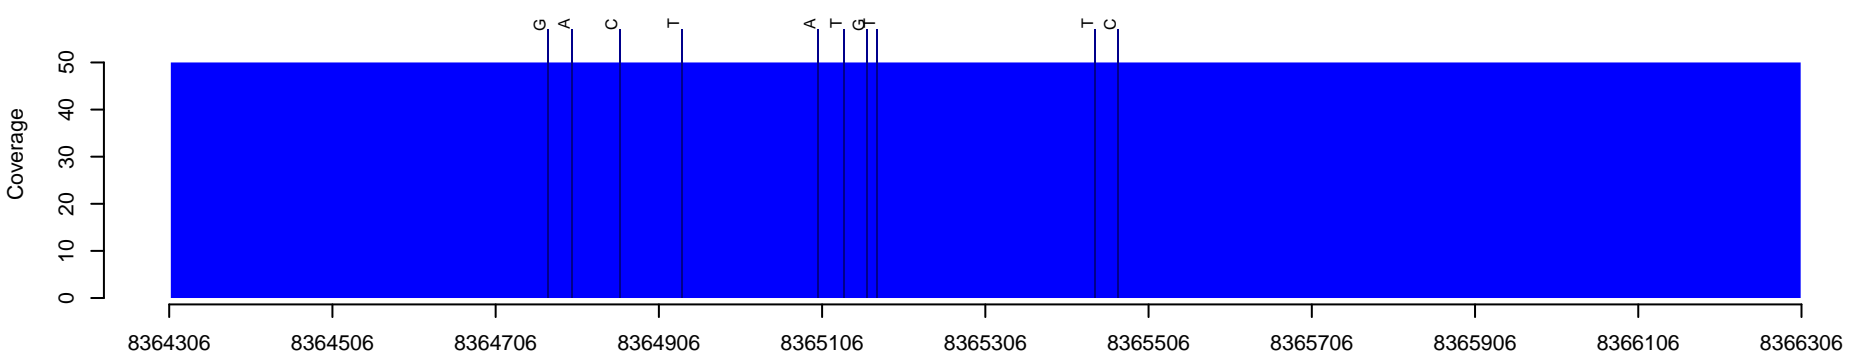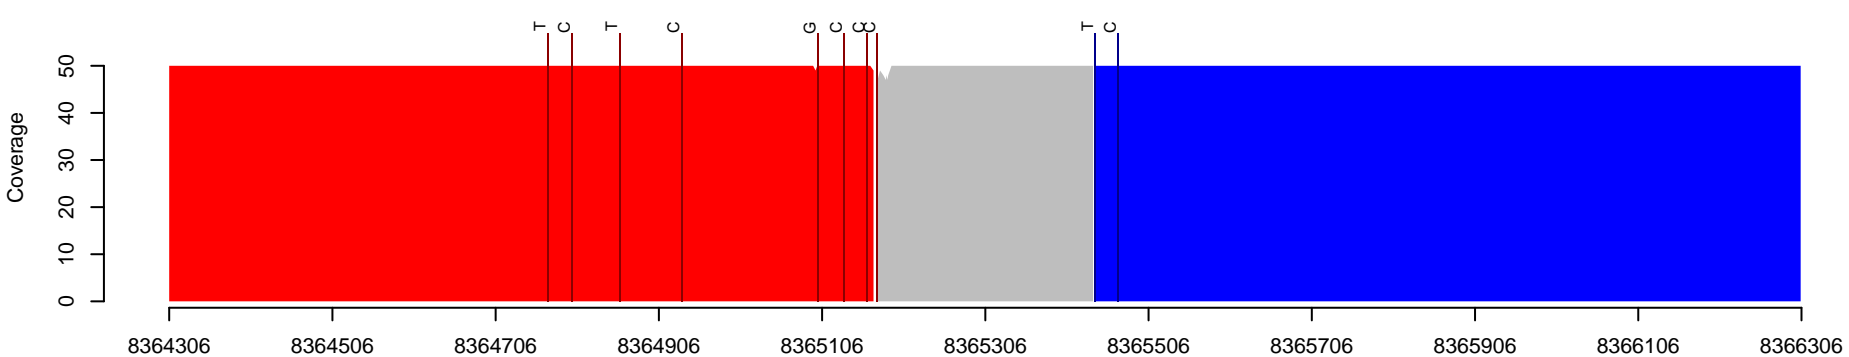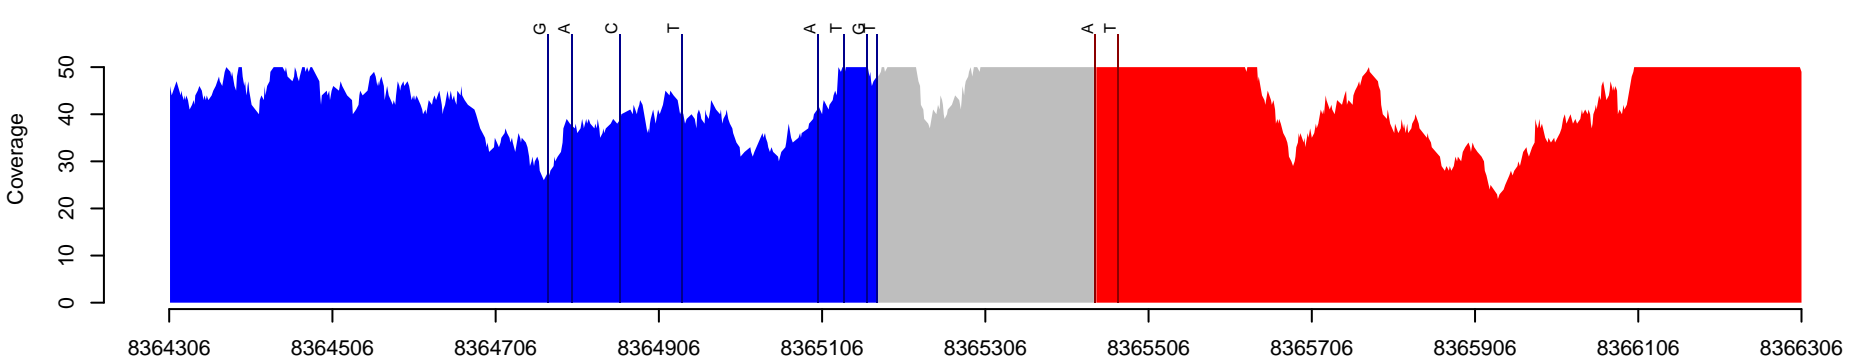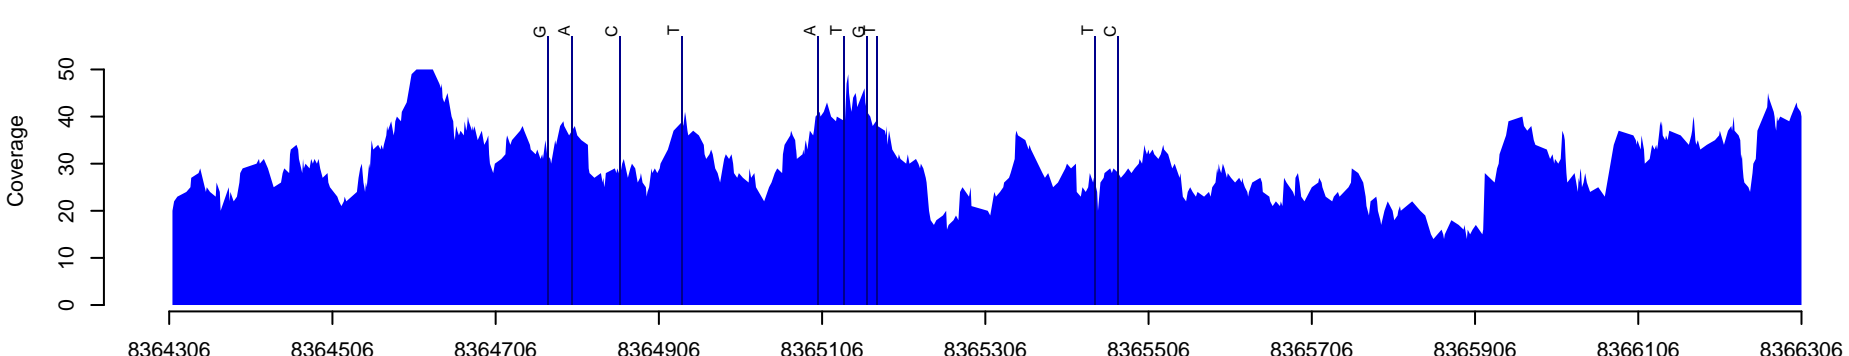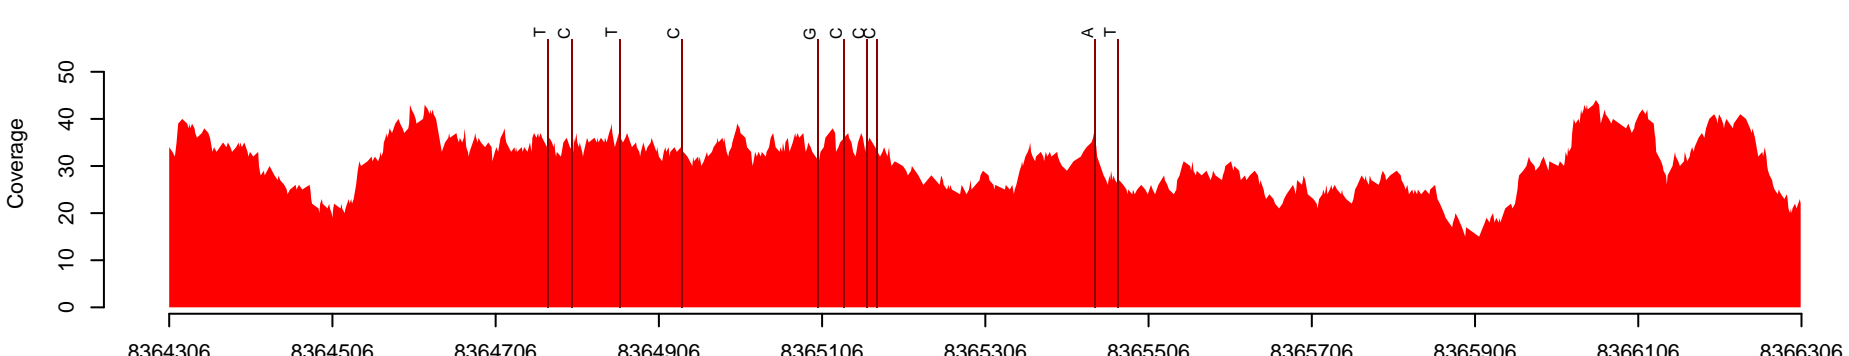

# ID29

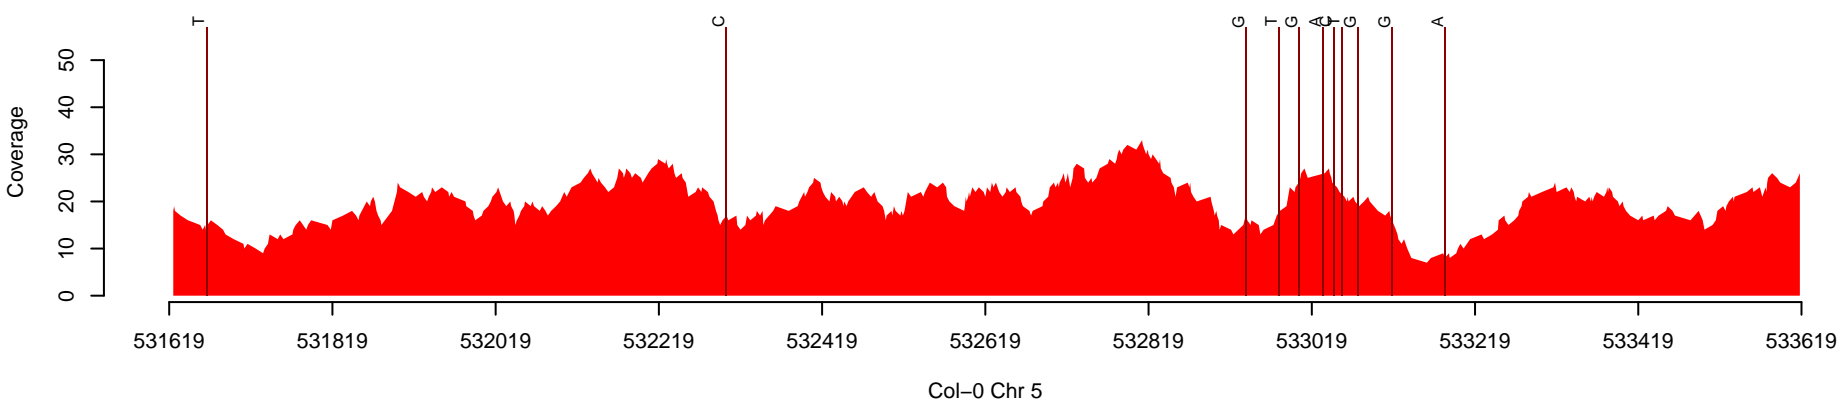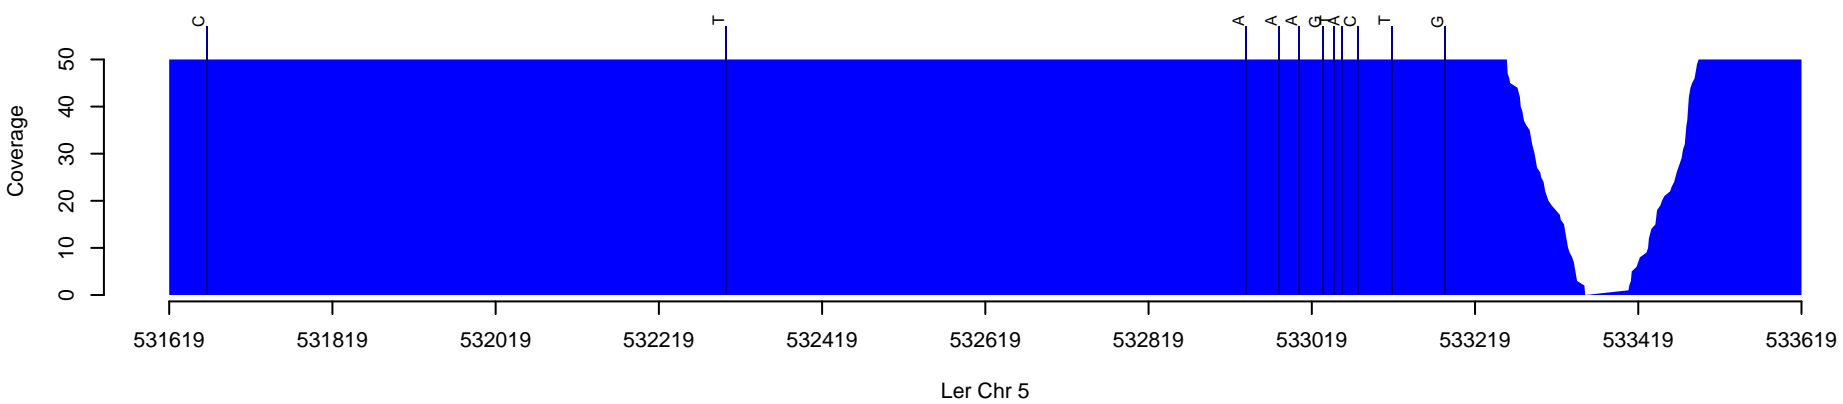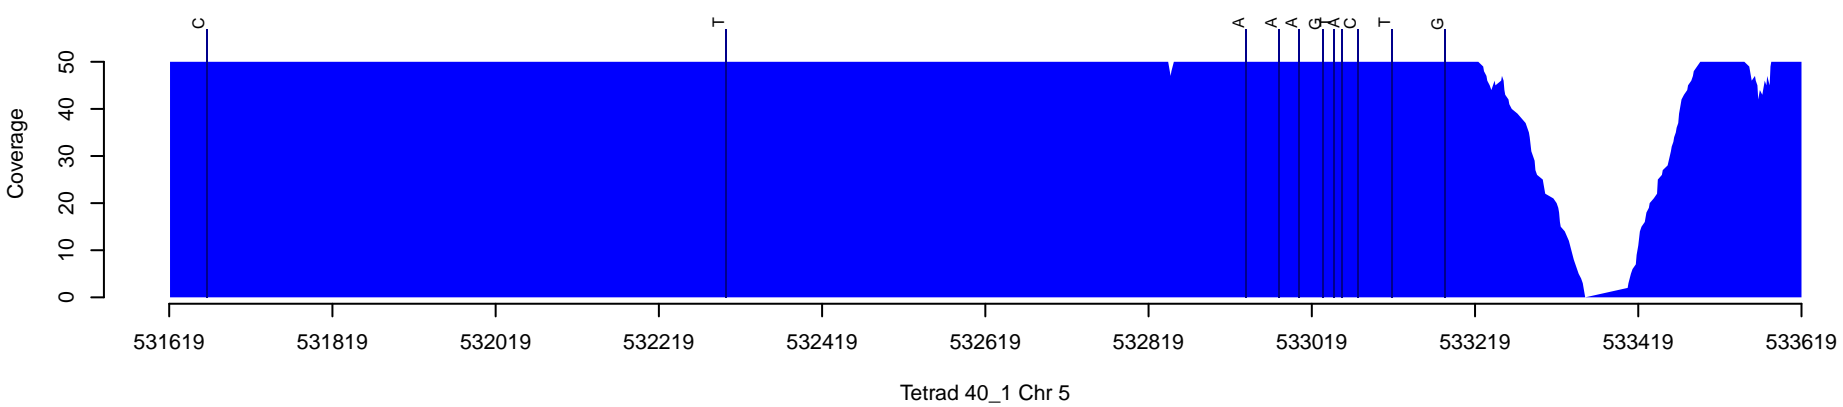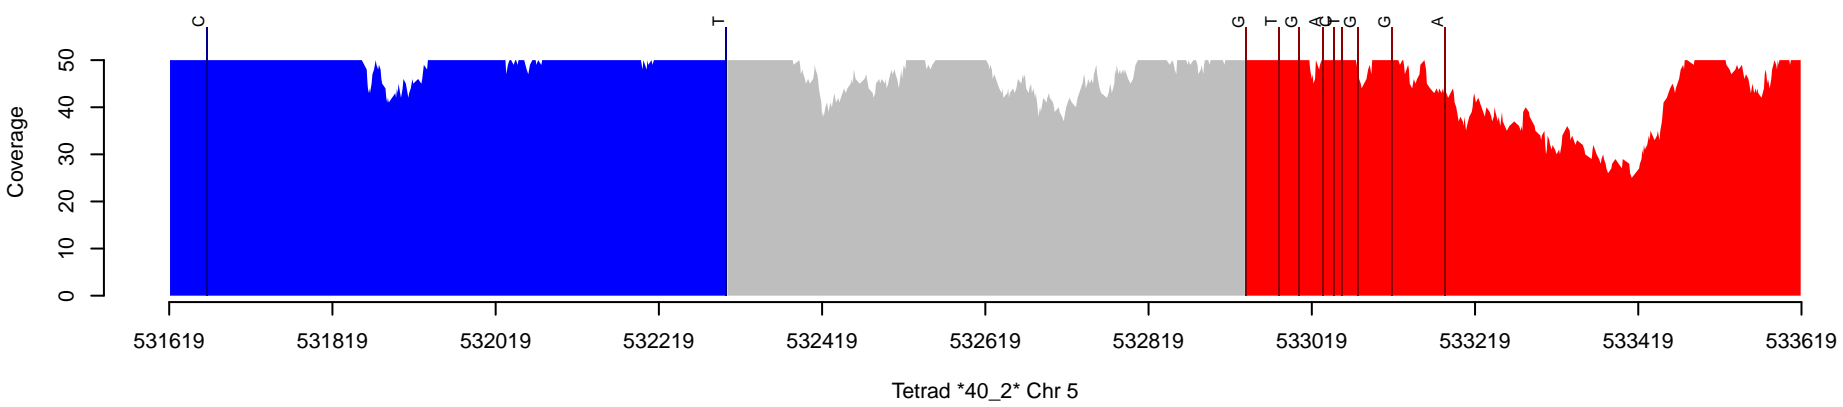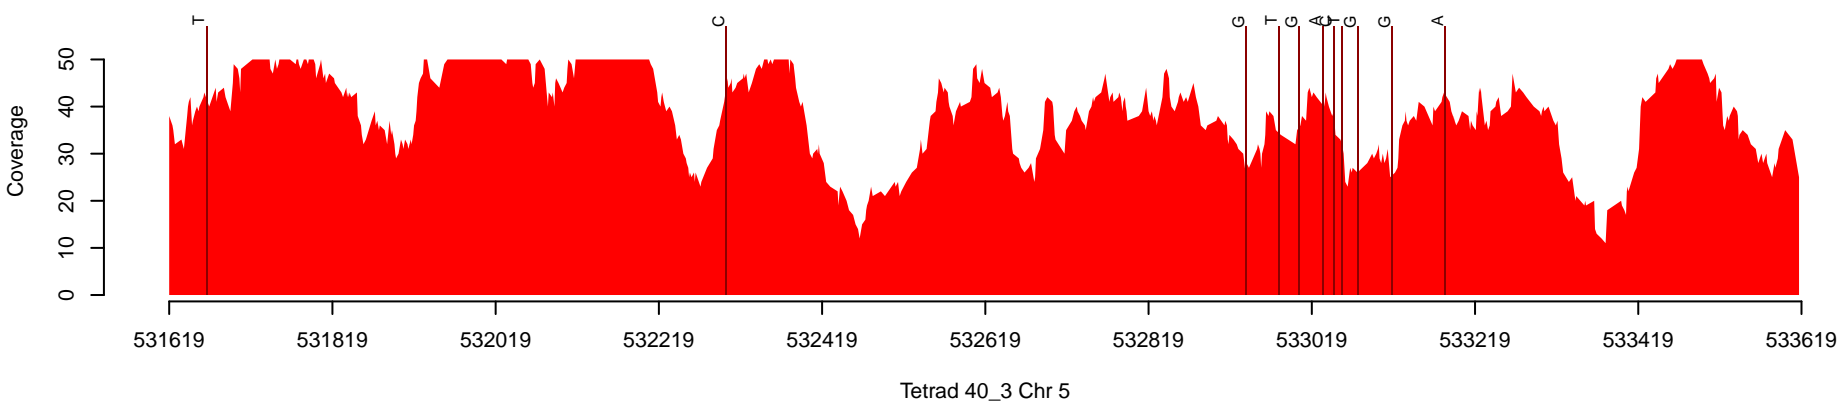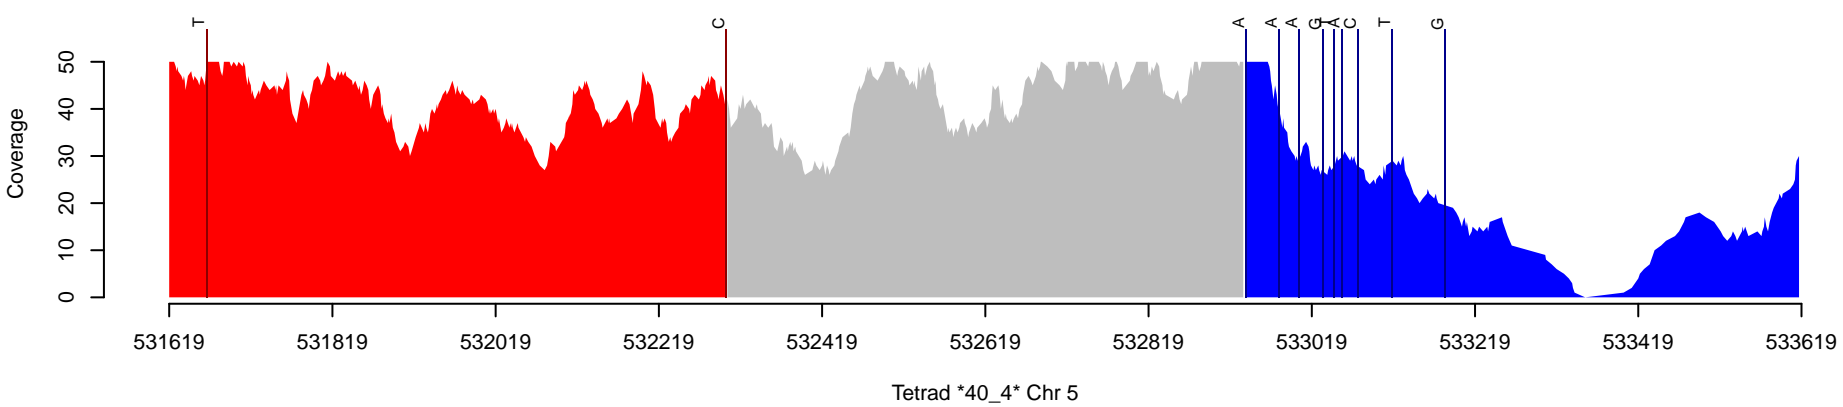

# ID30

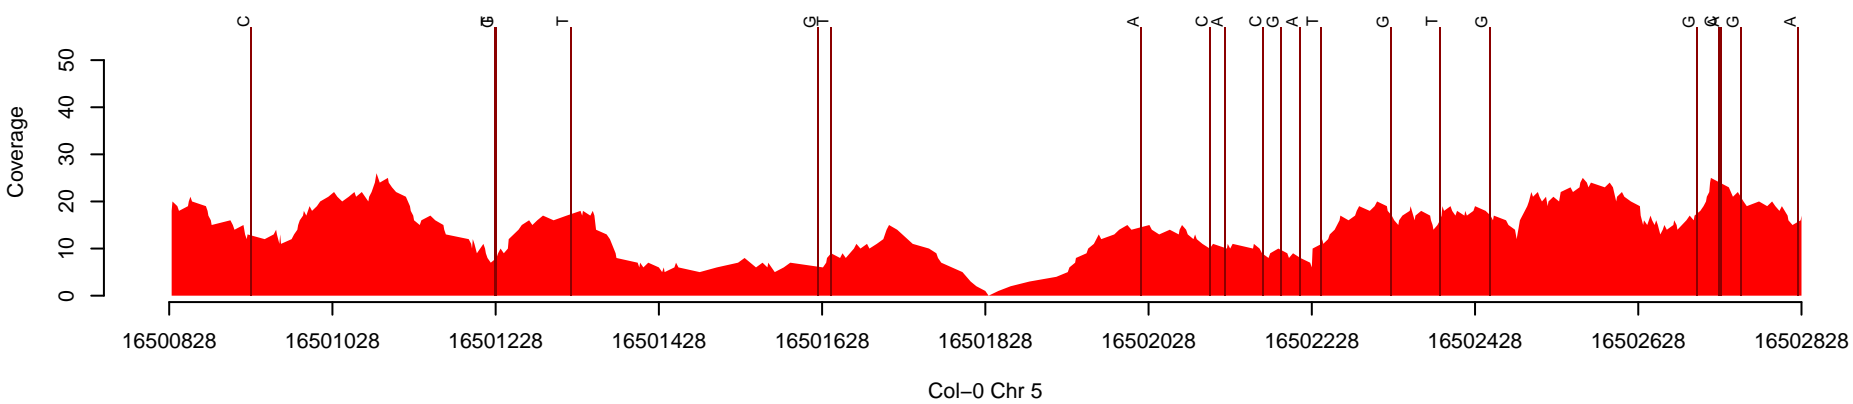

Col-0 Chr 5

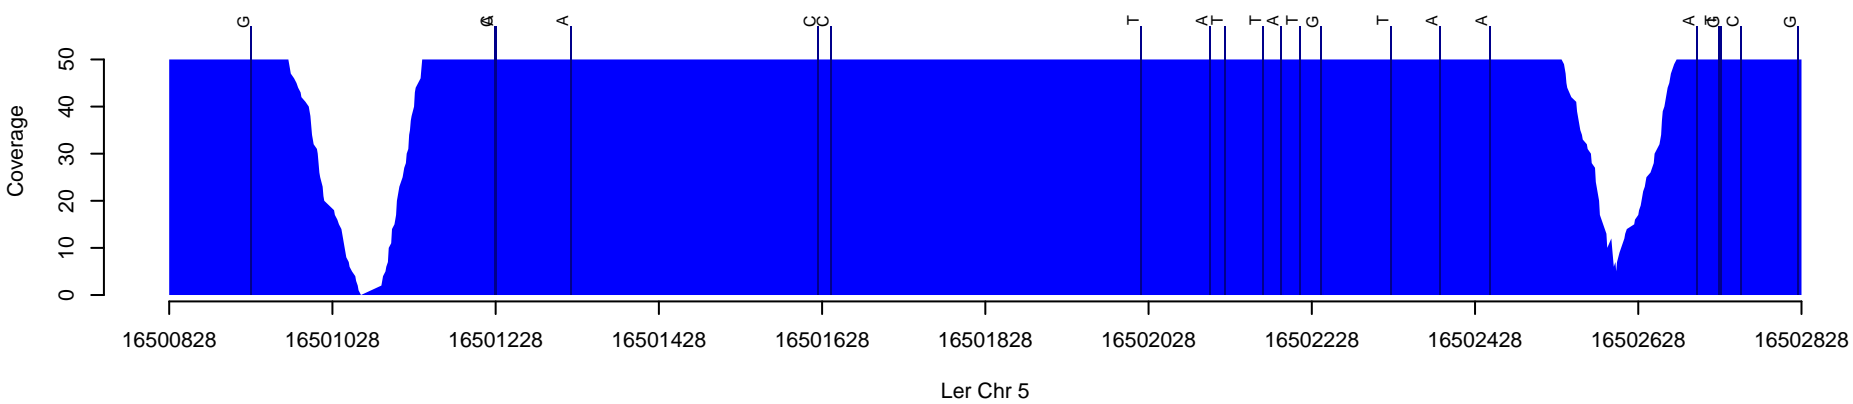

Ler Chr 5

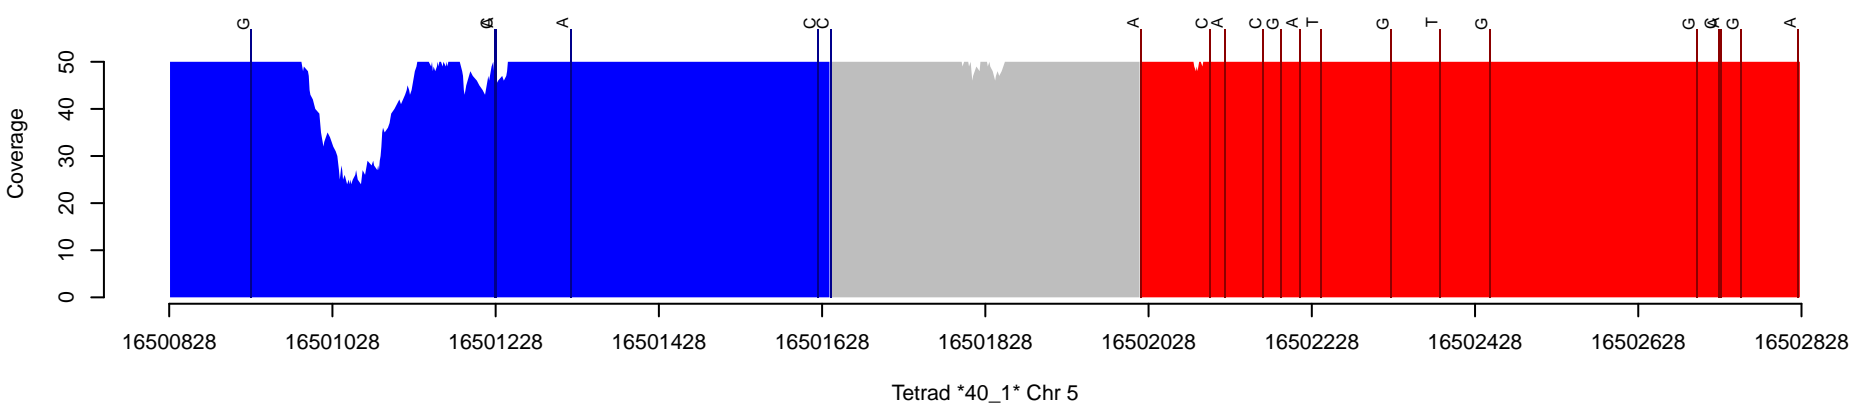

Tetrads \*40\_1\* Chr 5

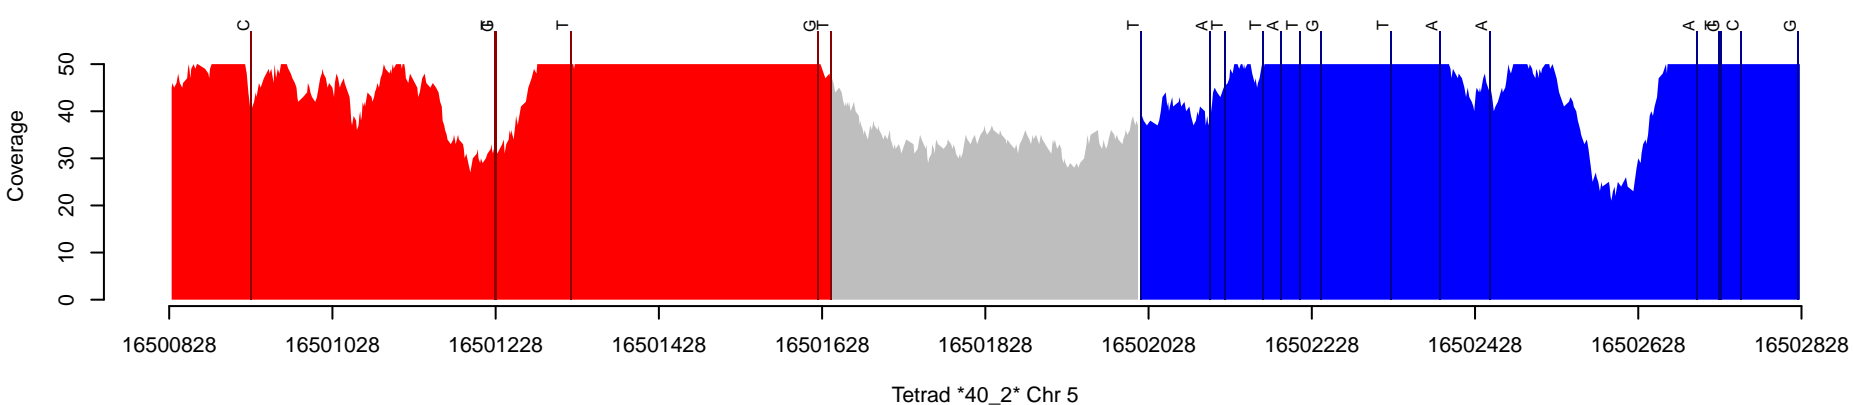

Tetrads \*40\_2\* Chr 5

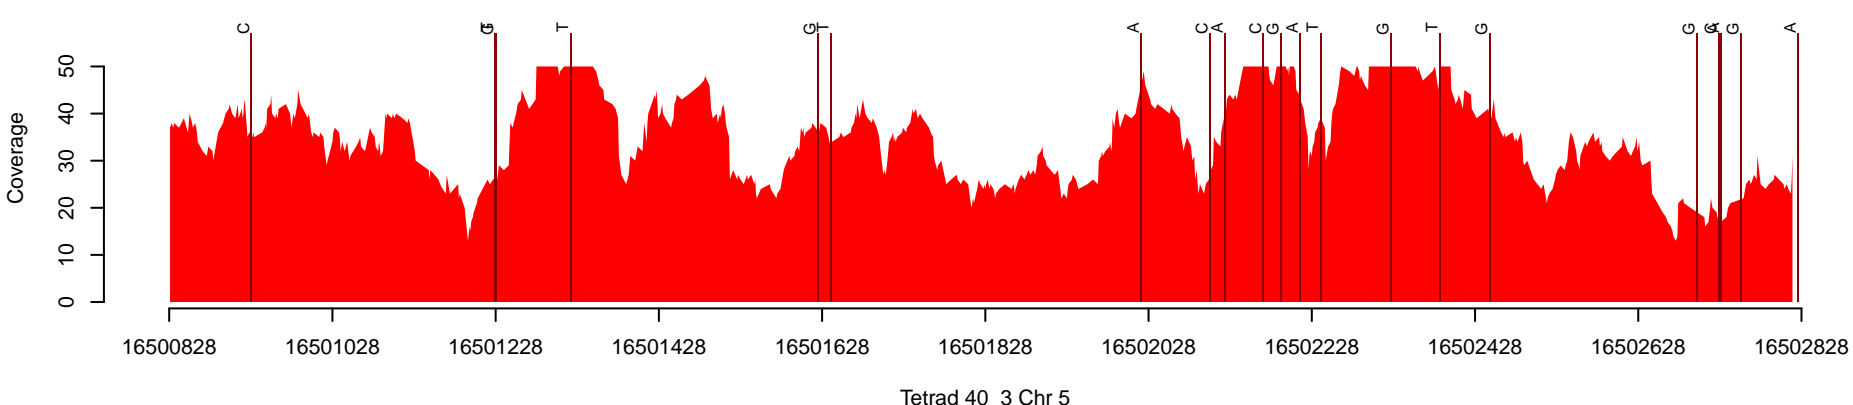

Tetrads 40\_3 Chr 5

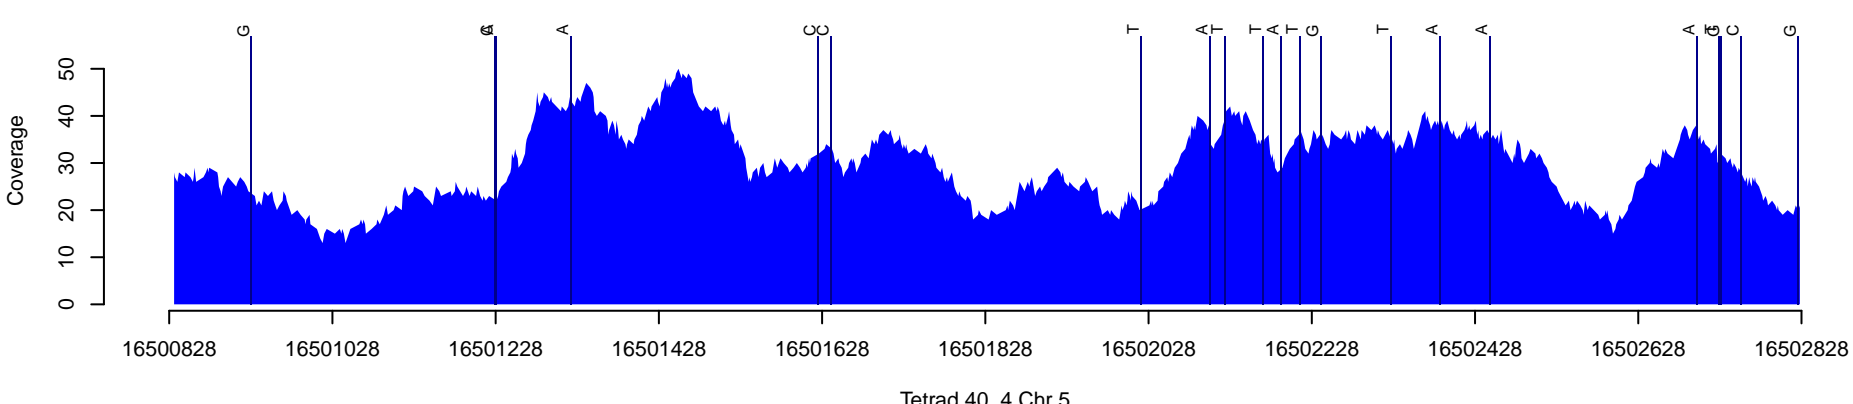

Tetrads 40\_4 Chr 5

# ID31

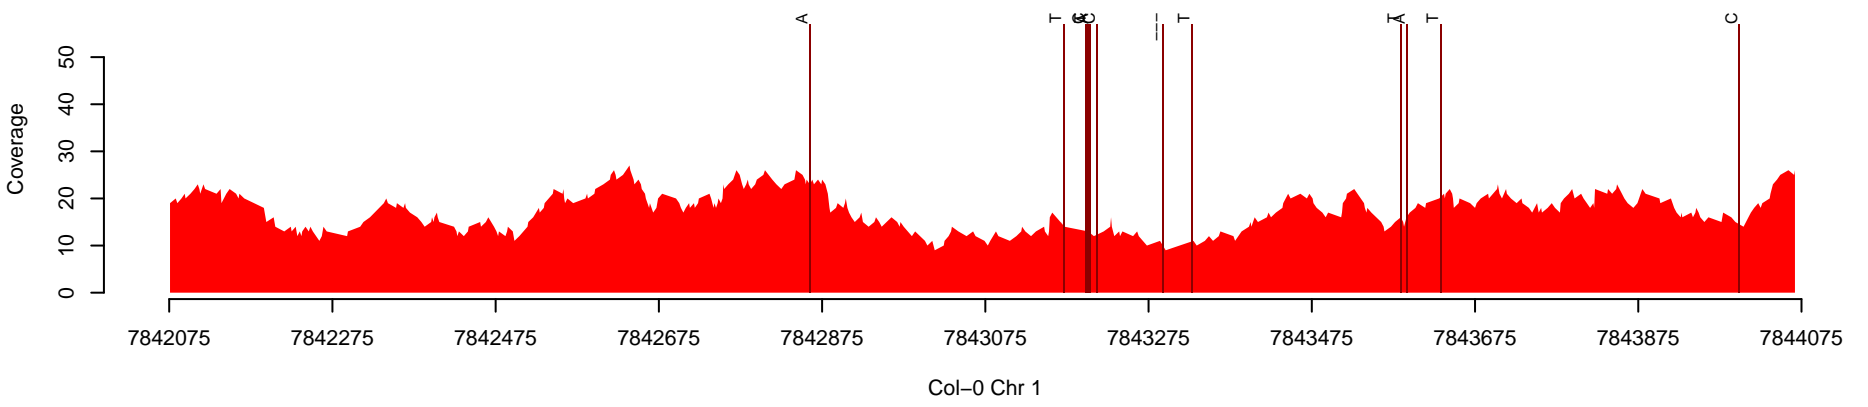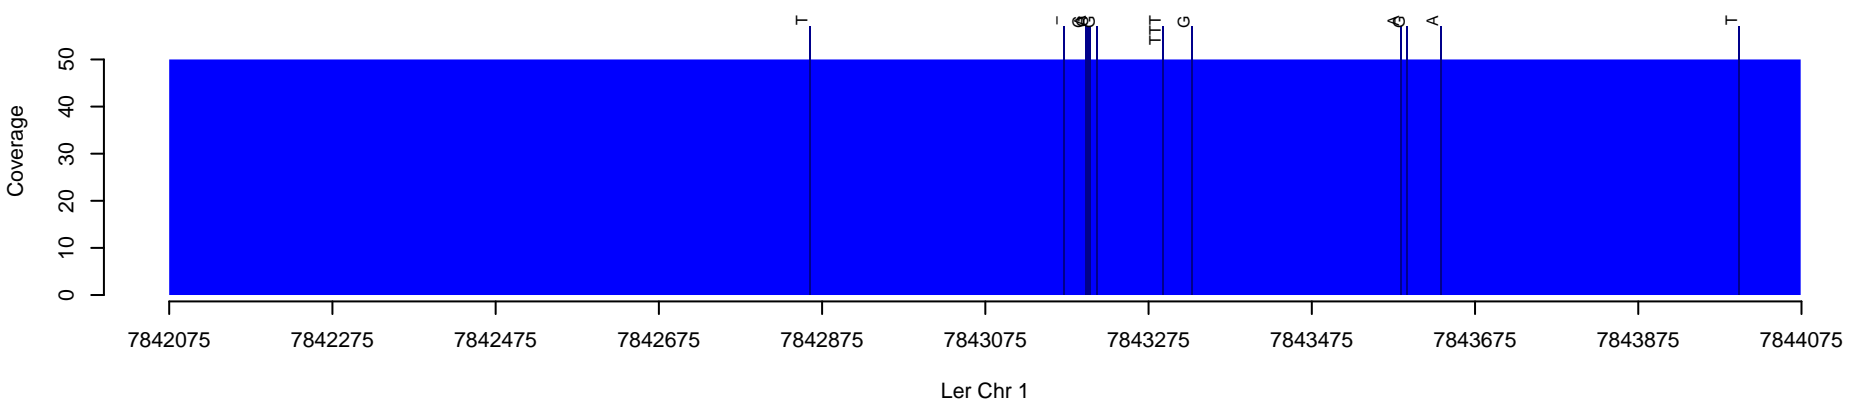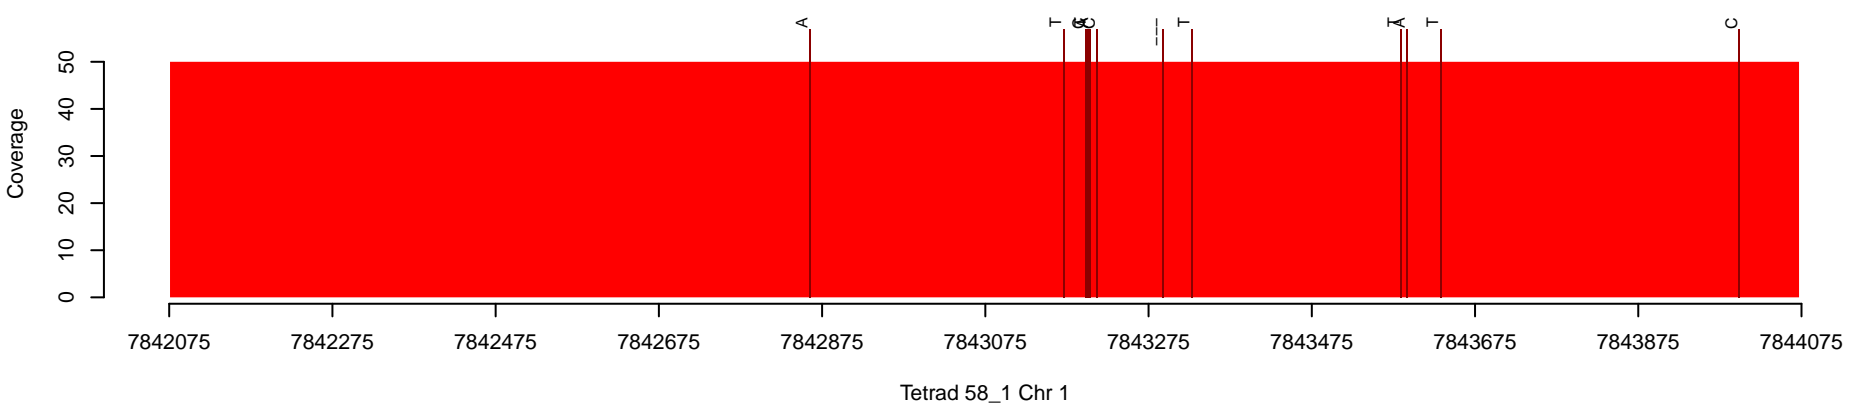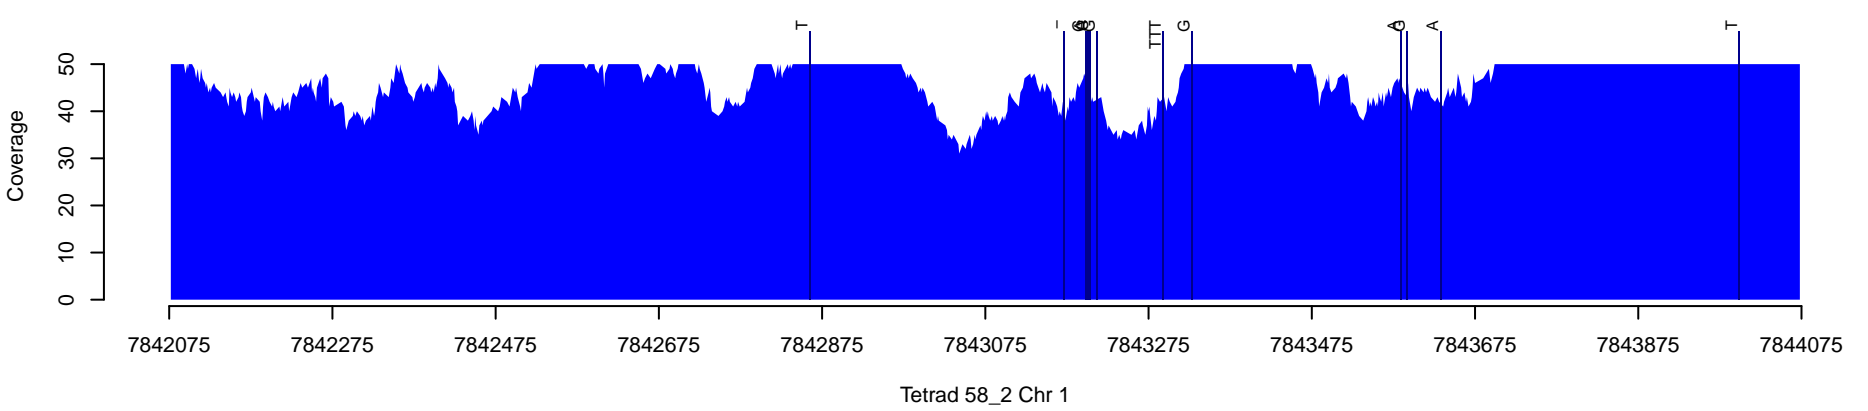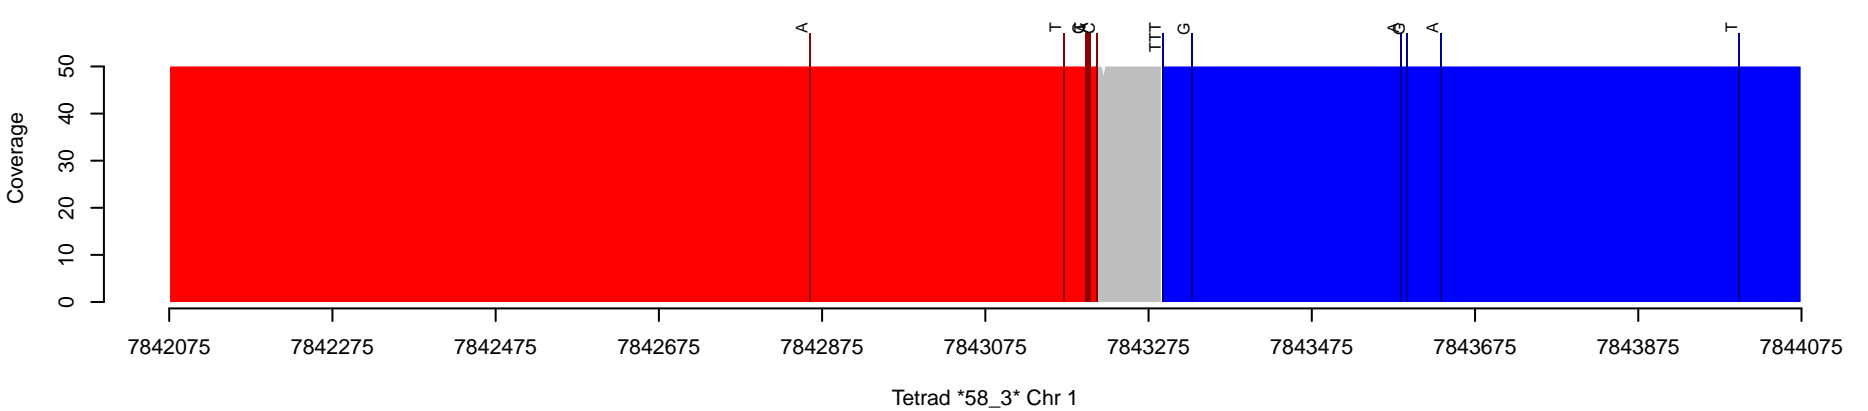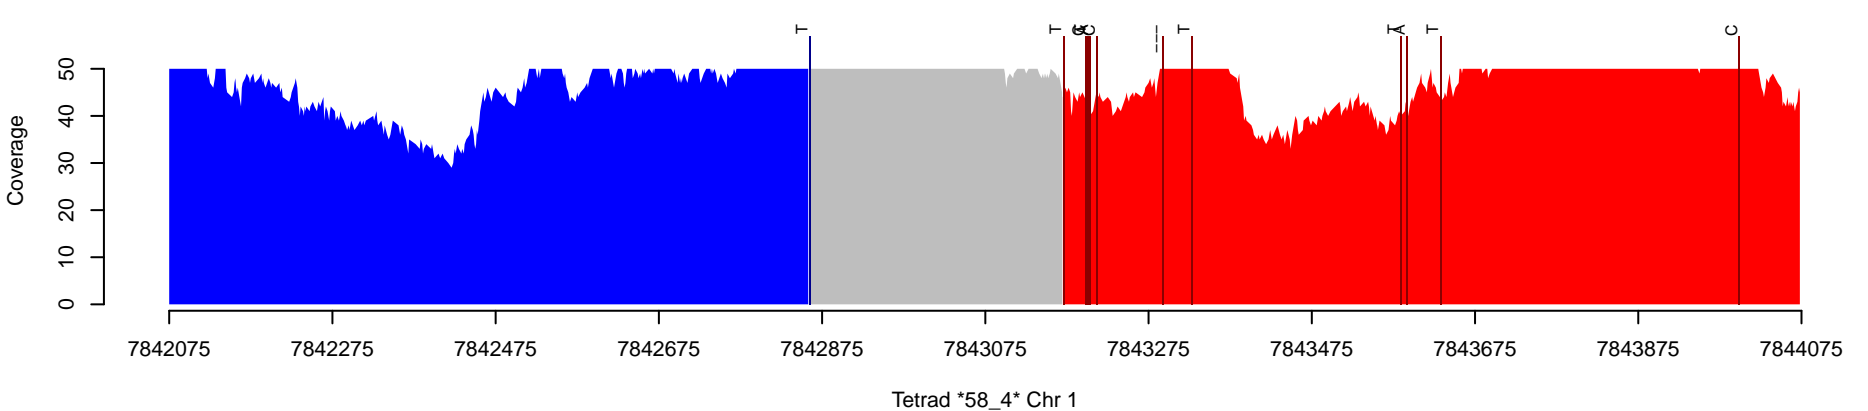

# ID32

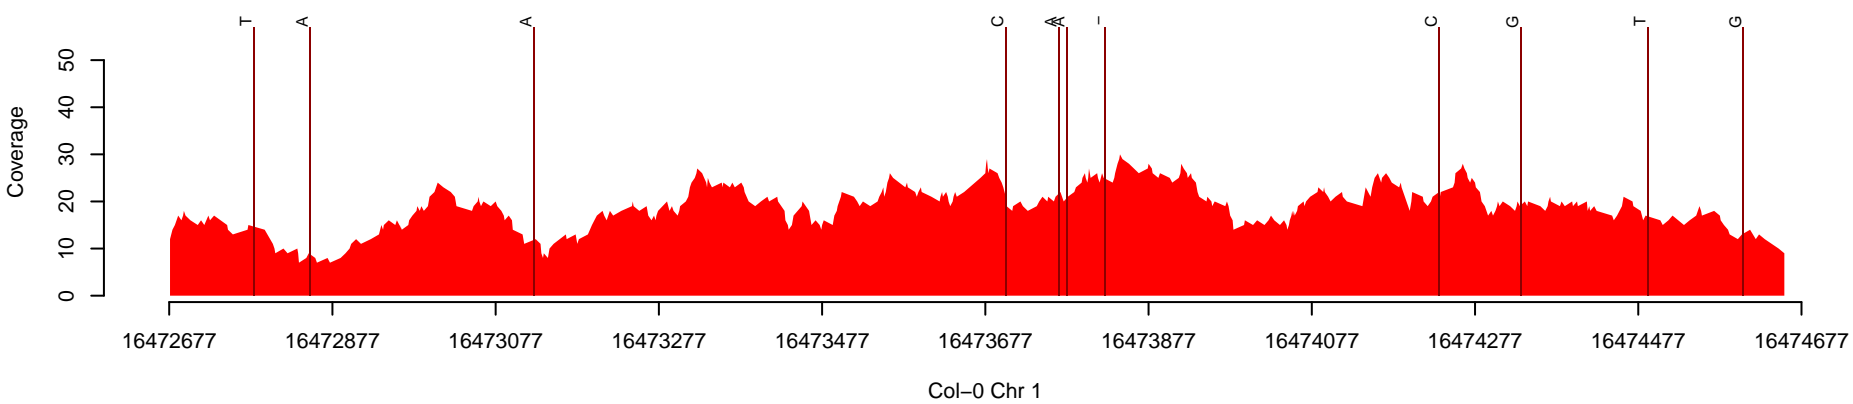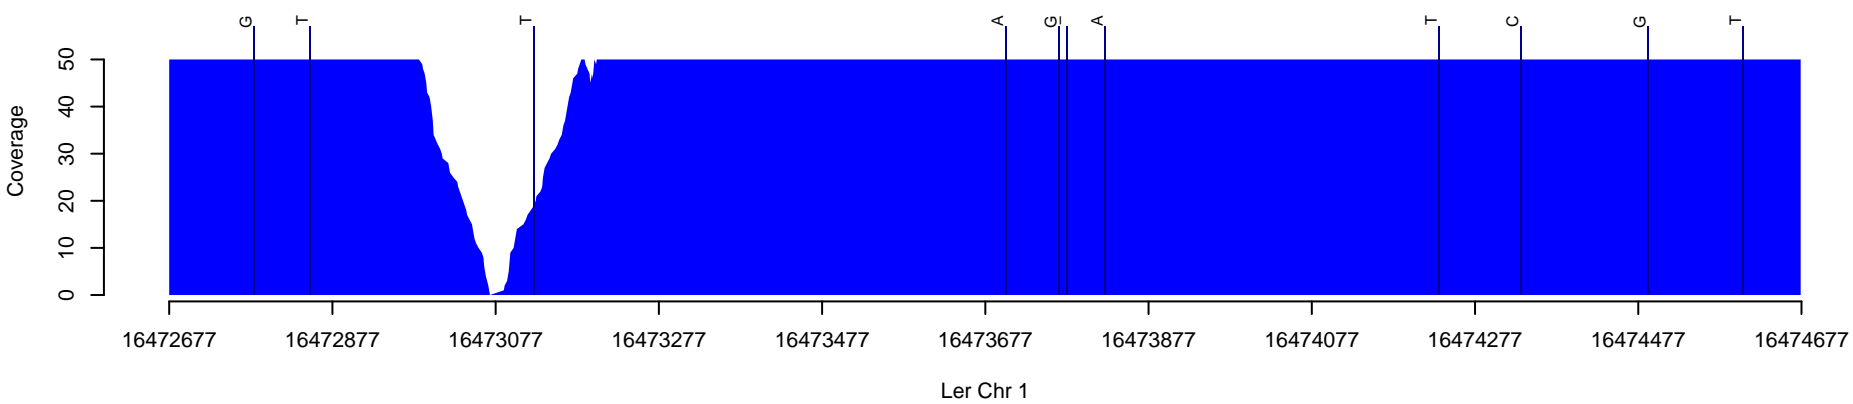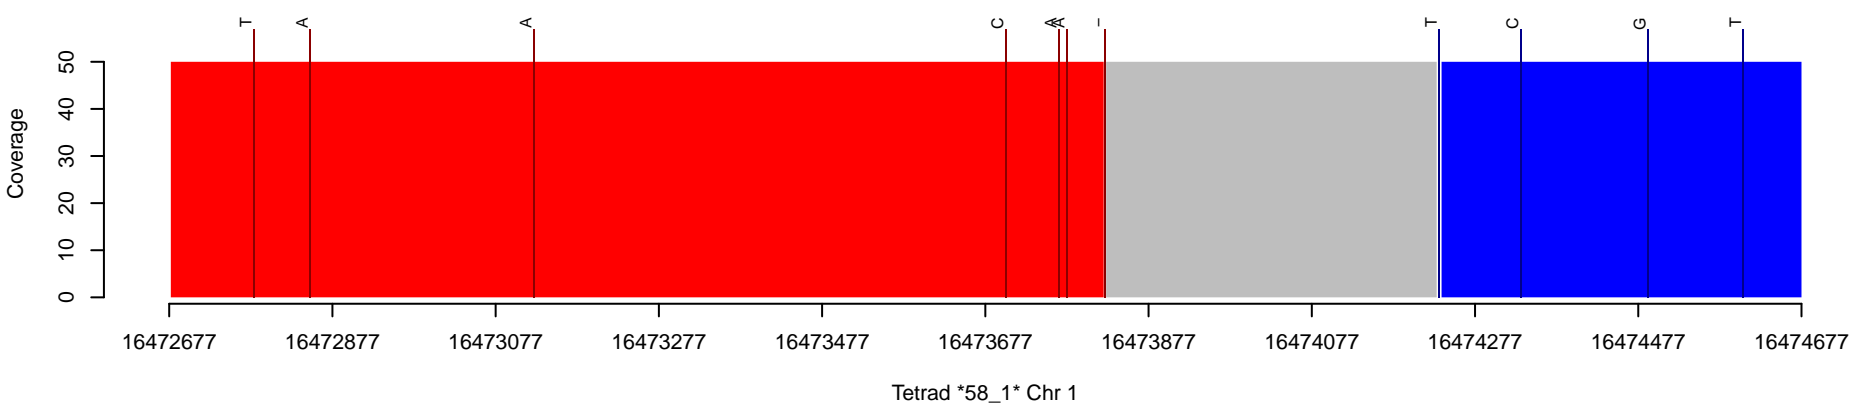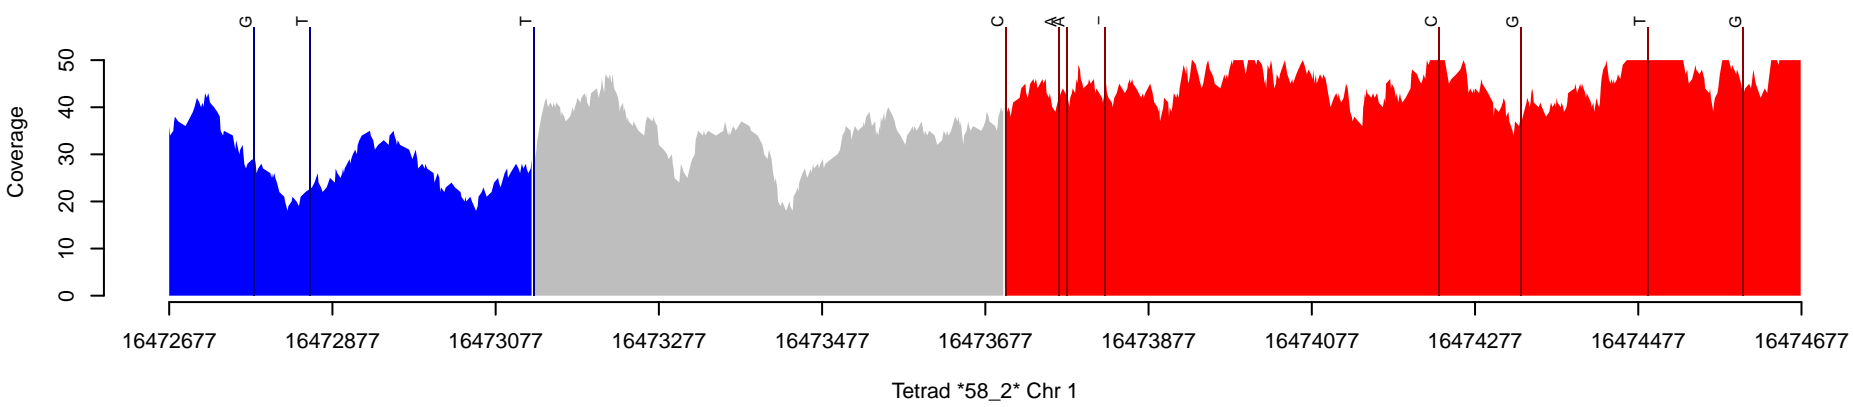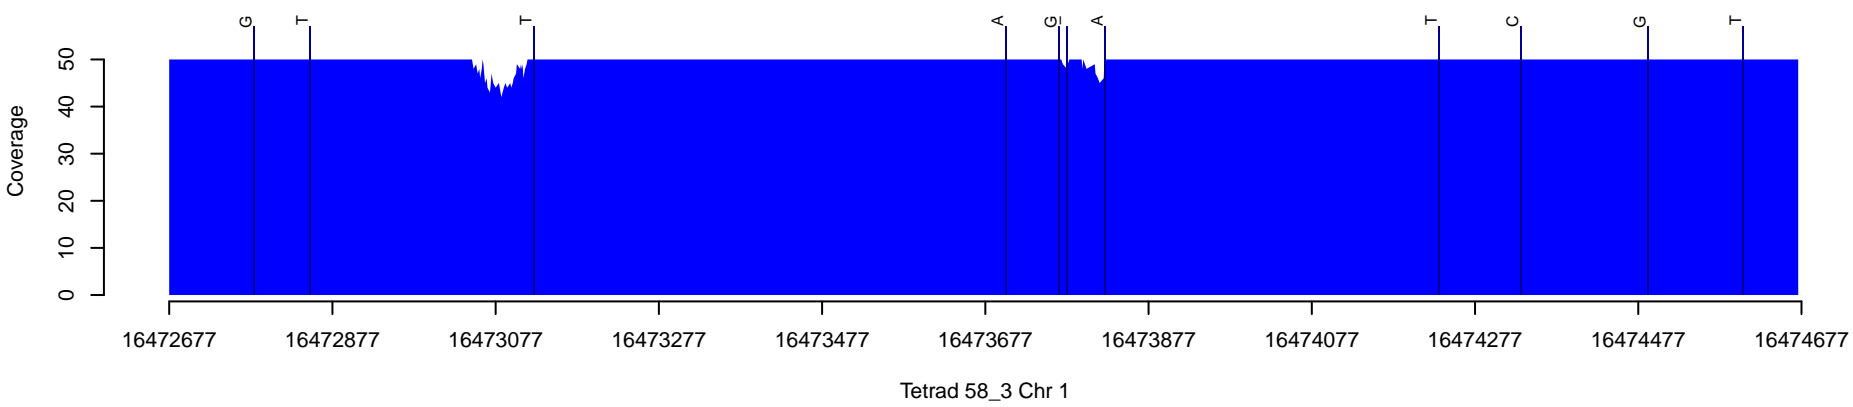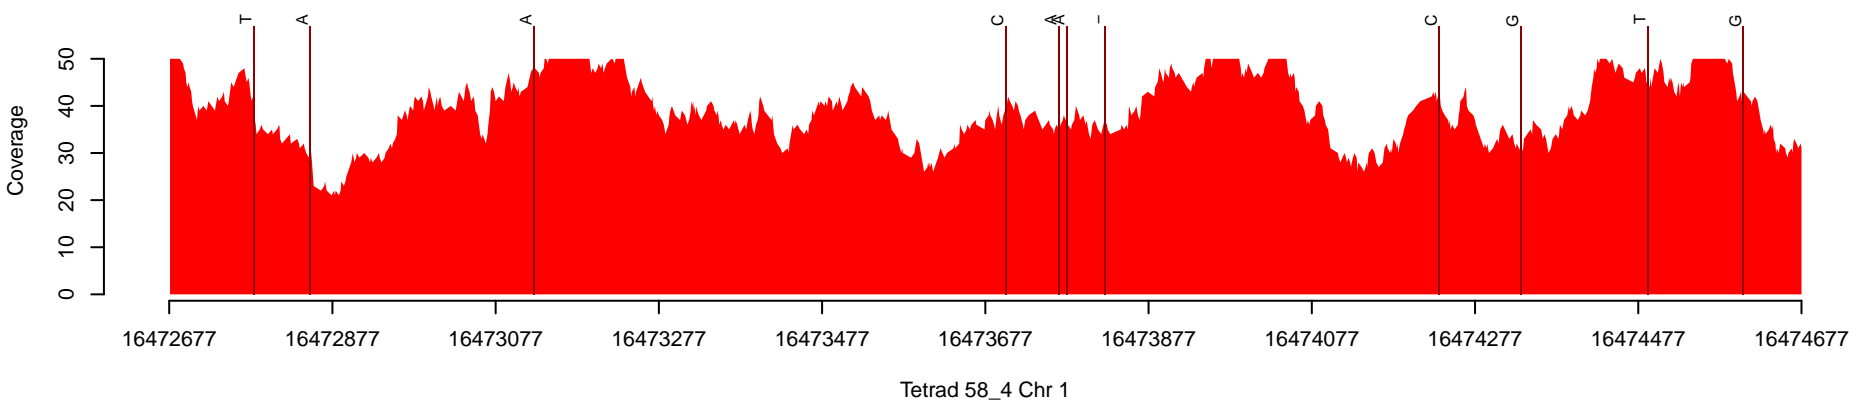



# ID33

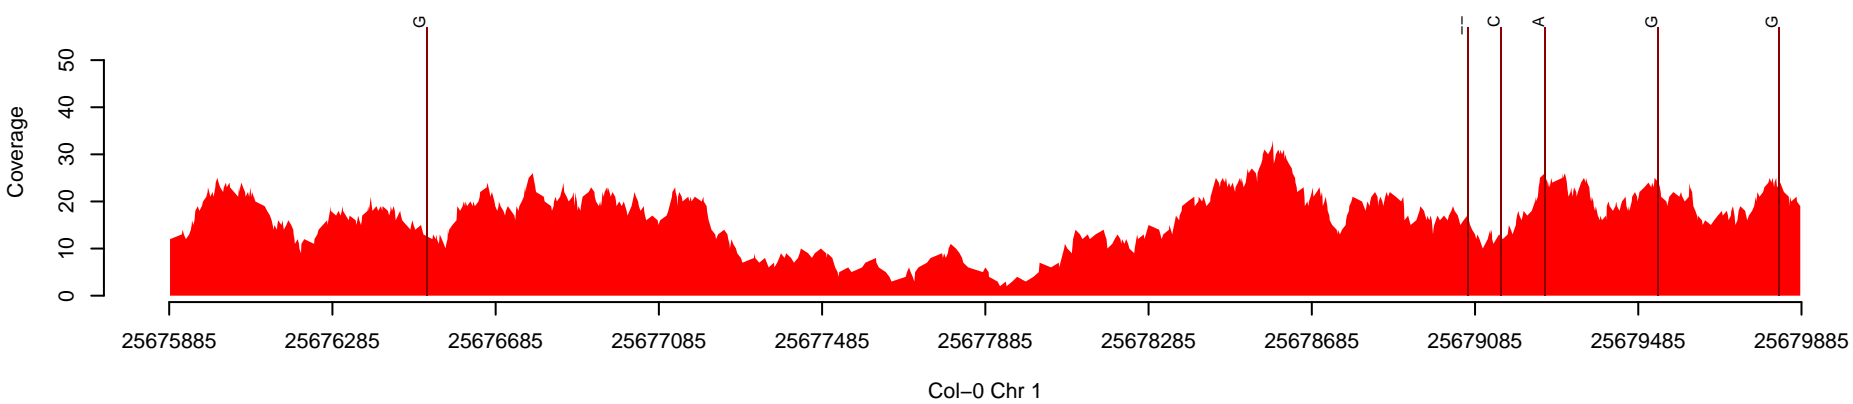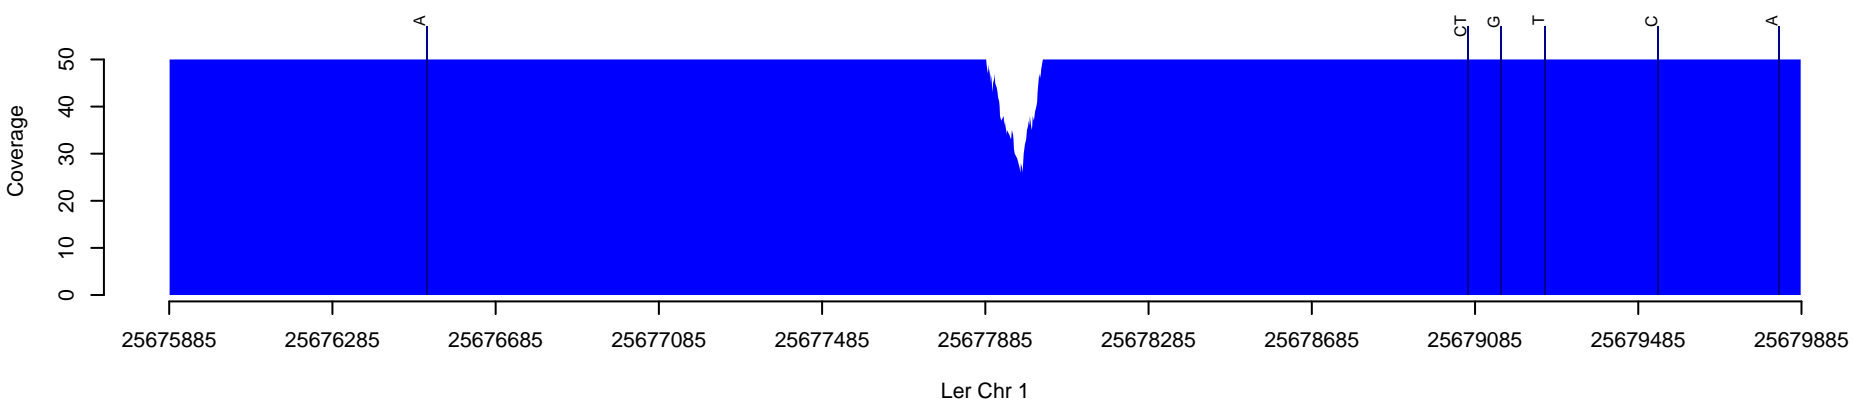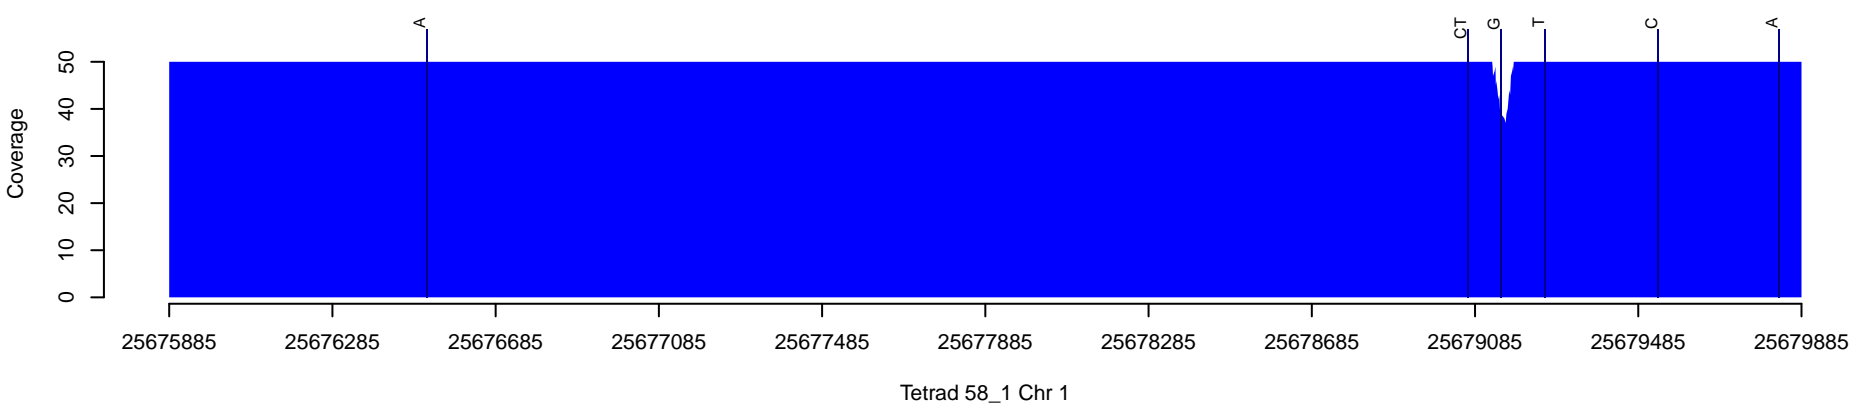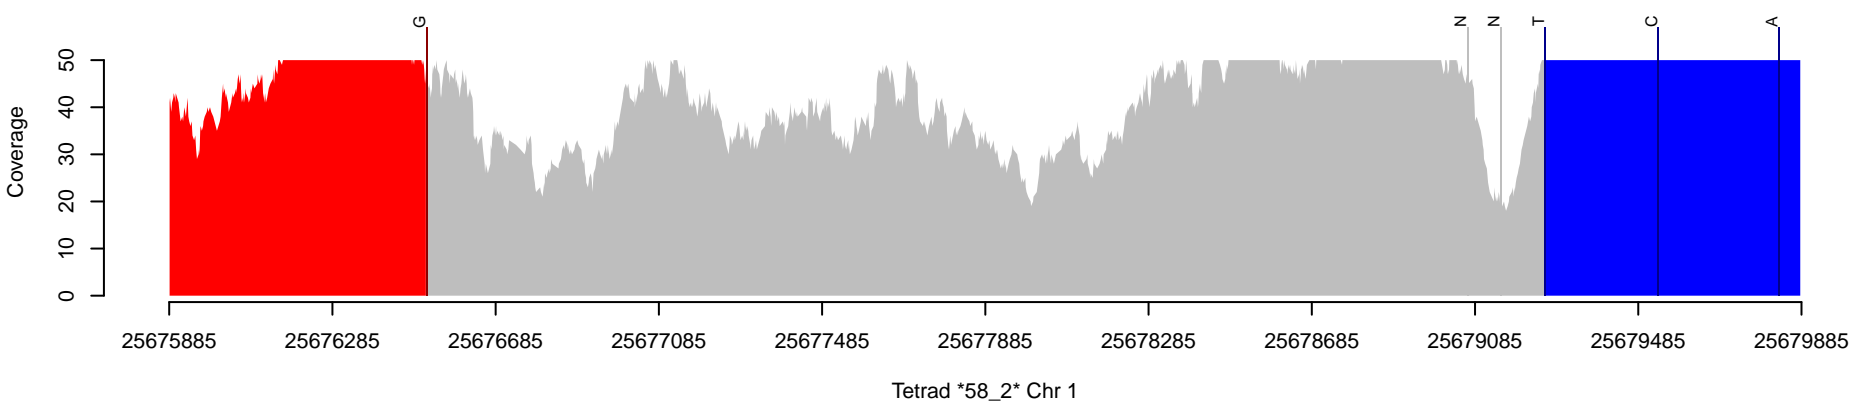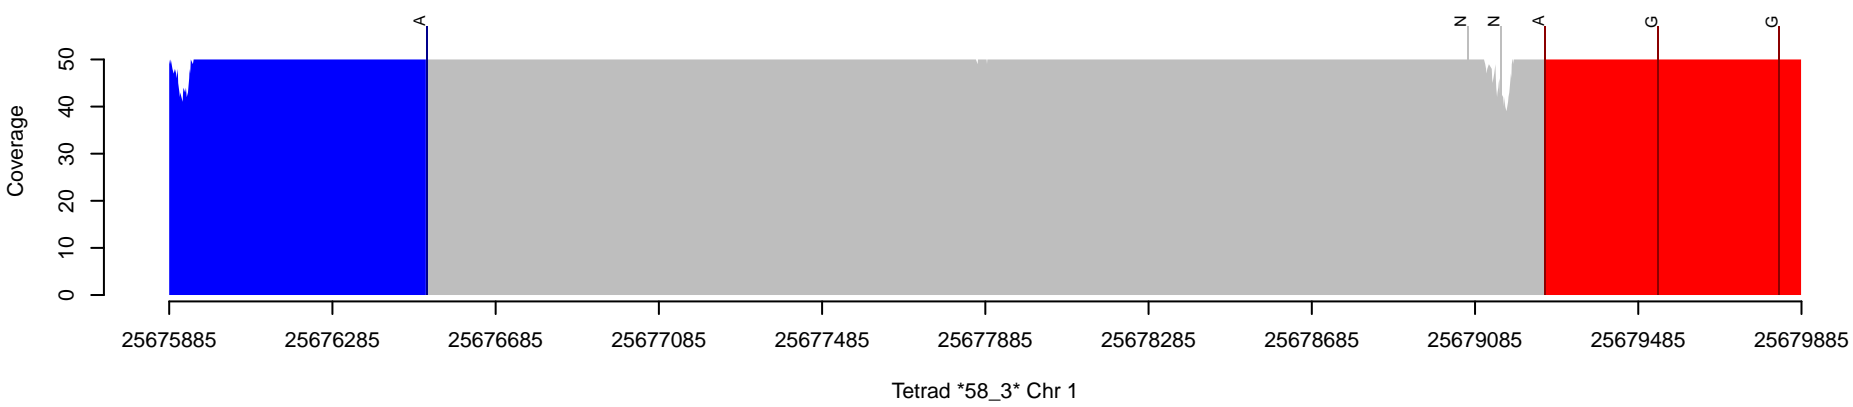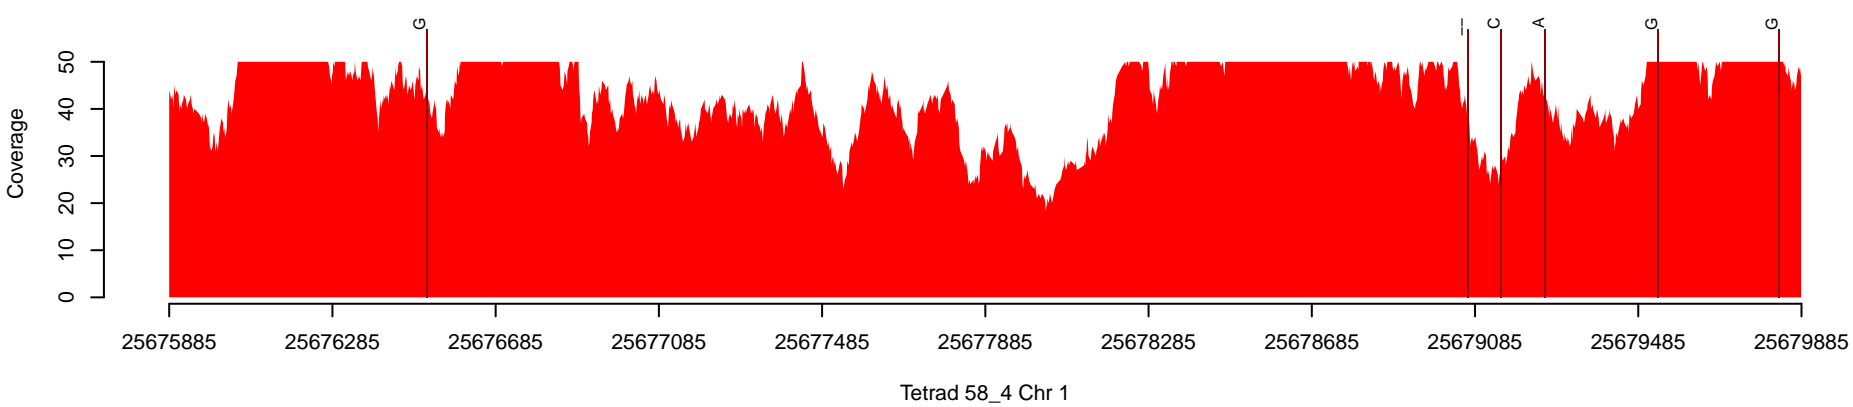

# ID34

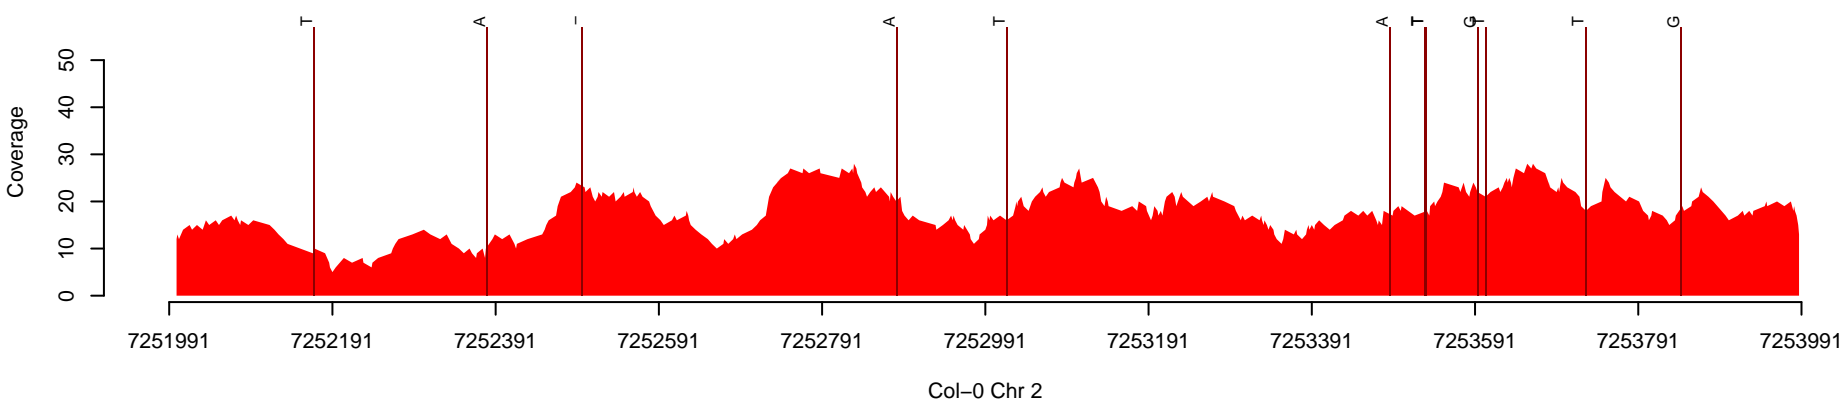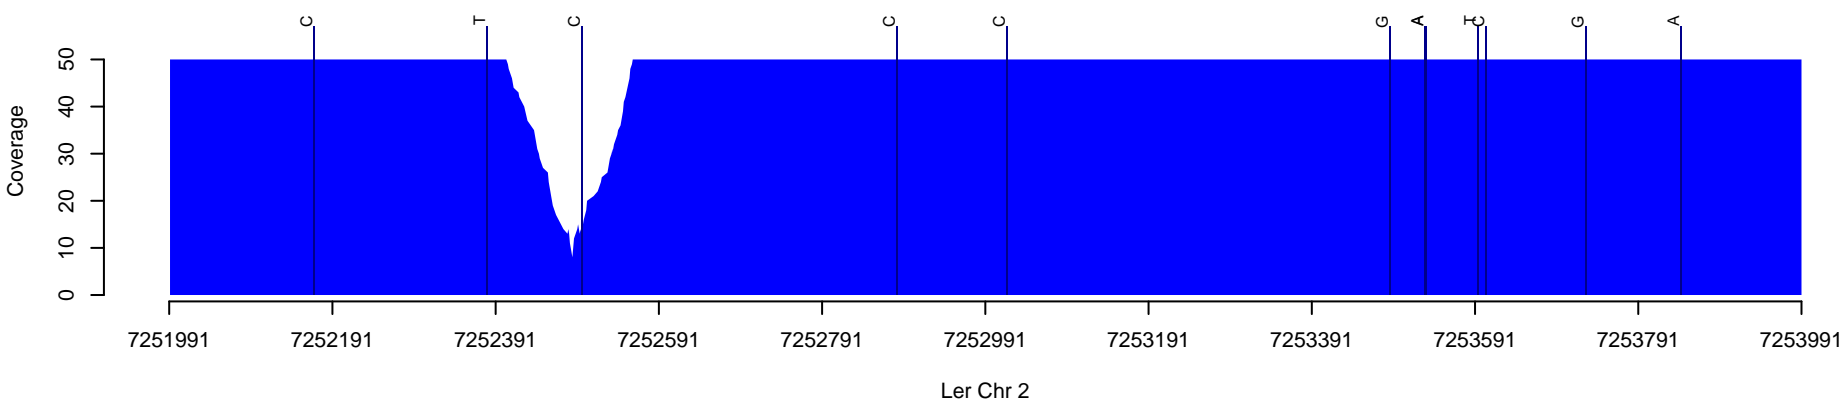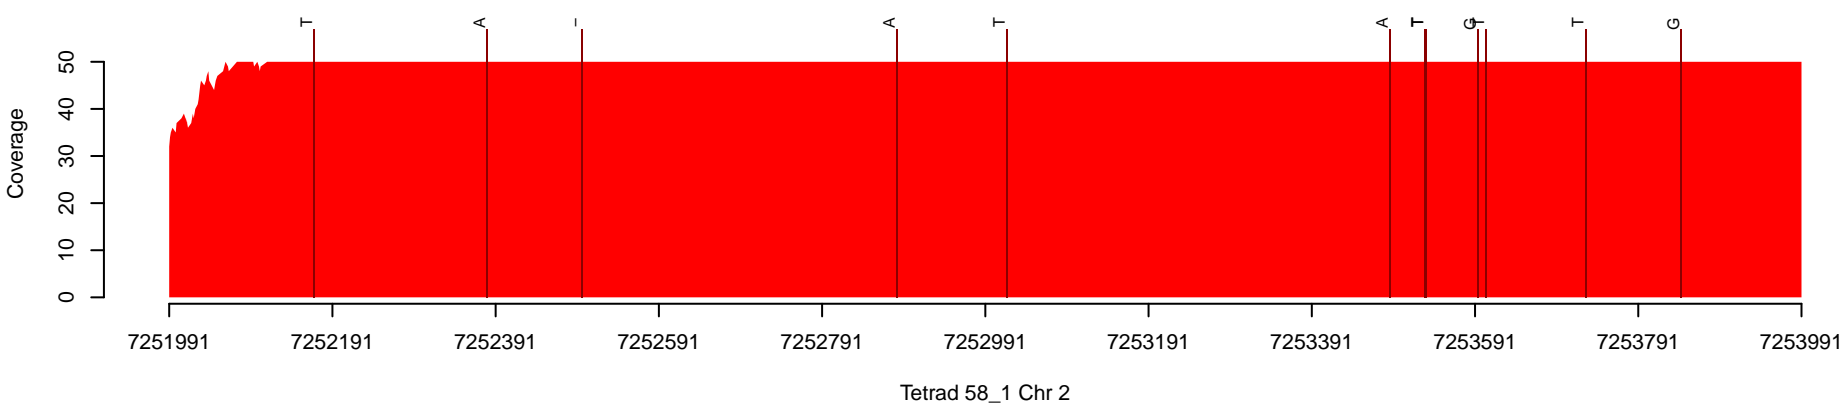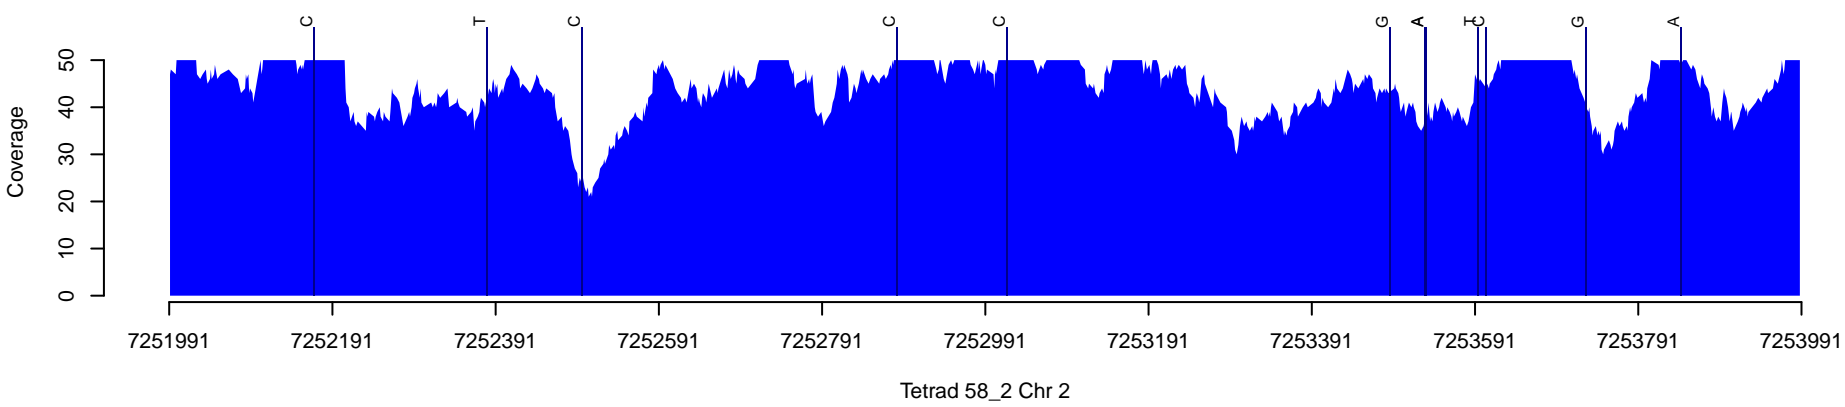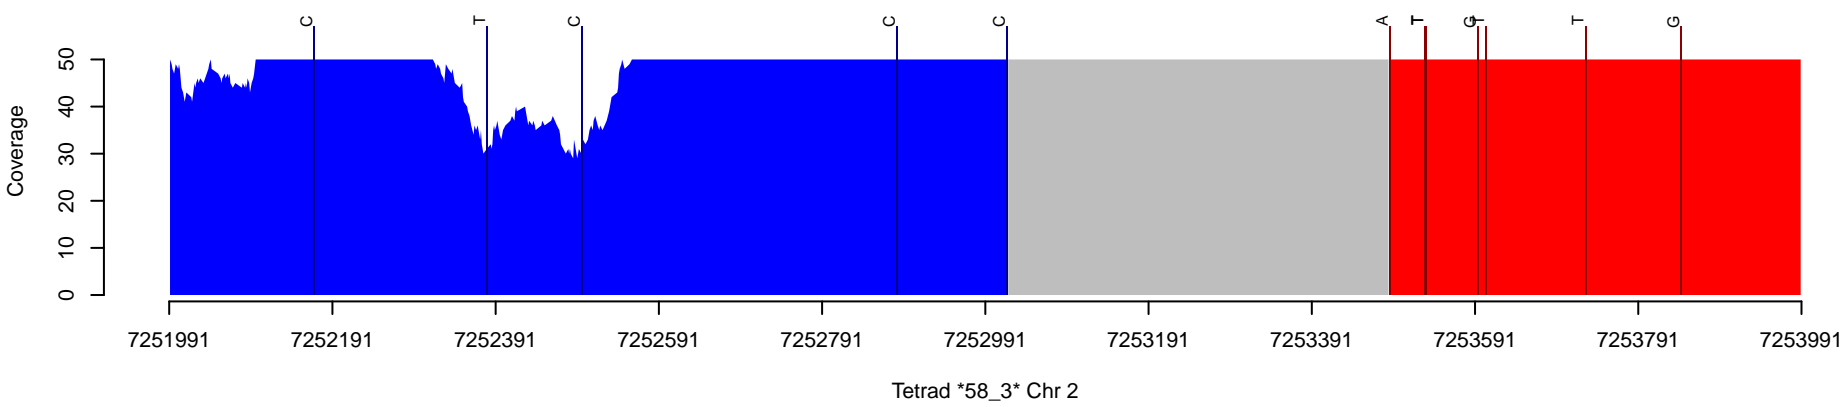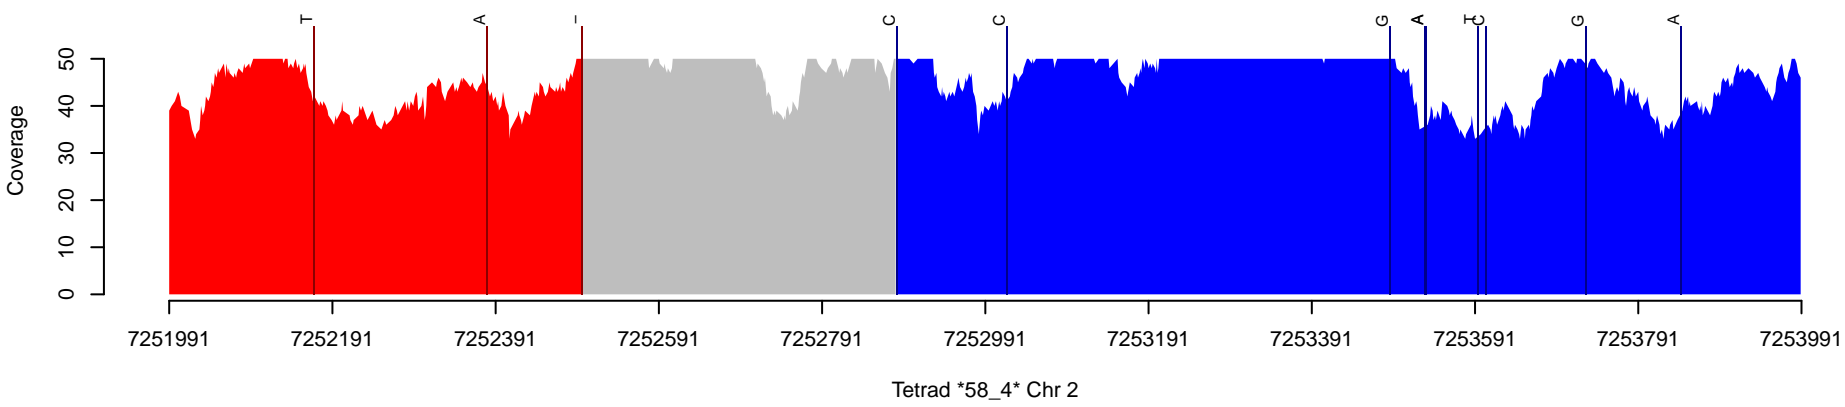

# ID35

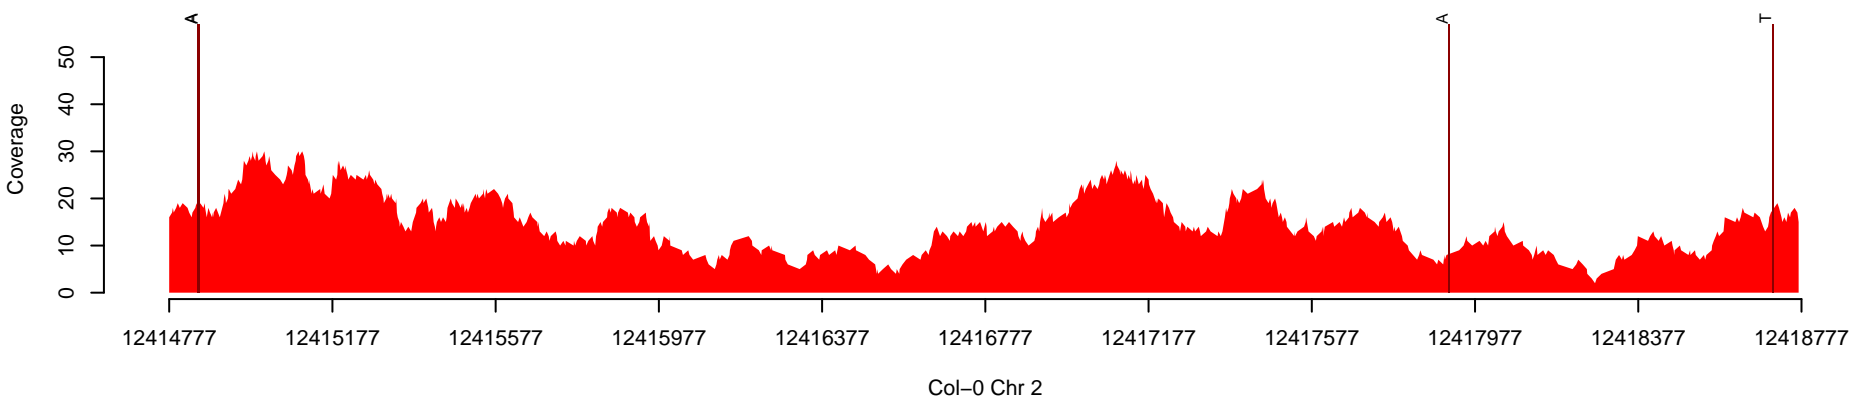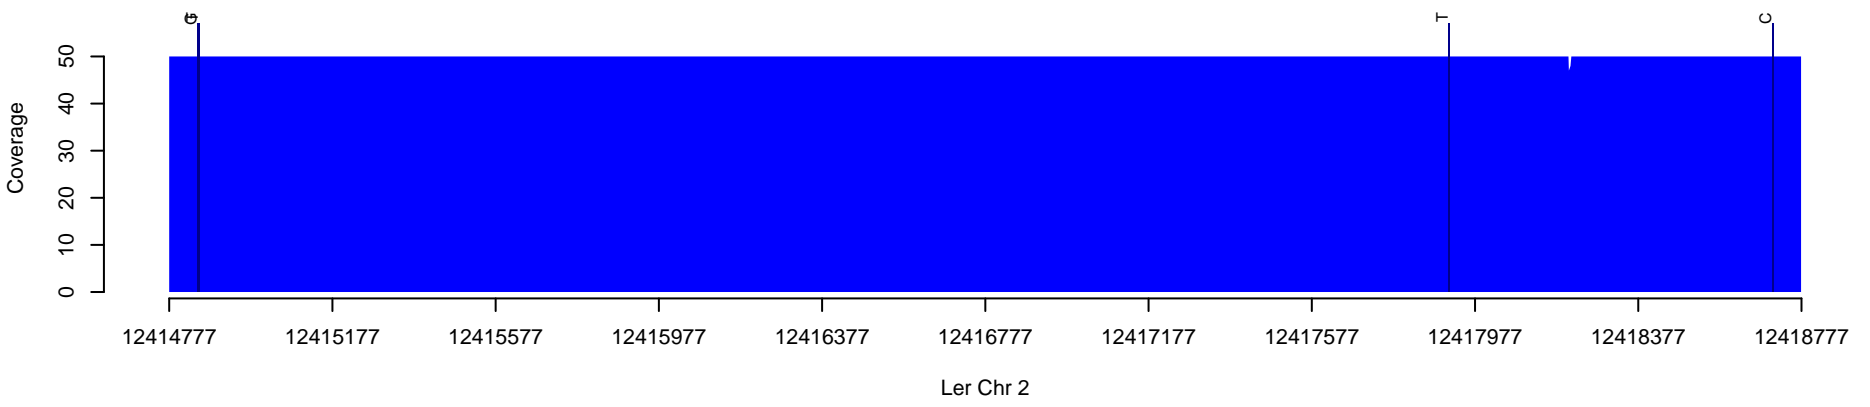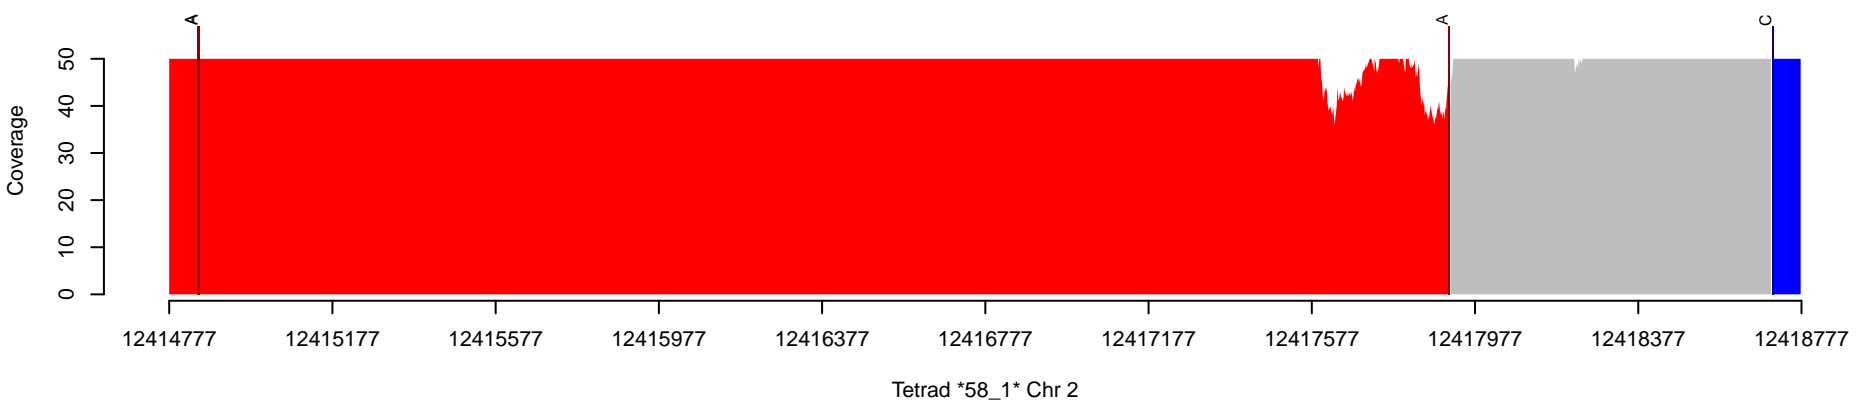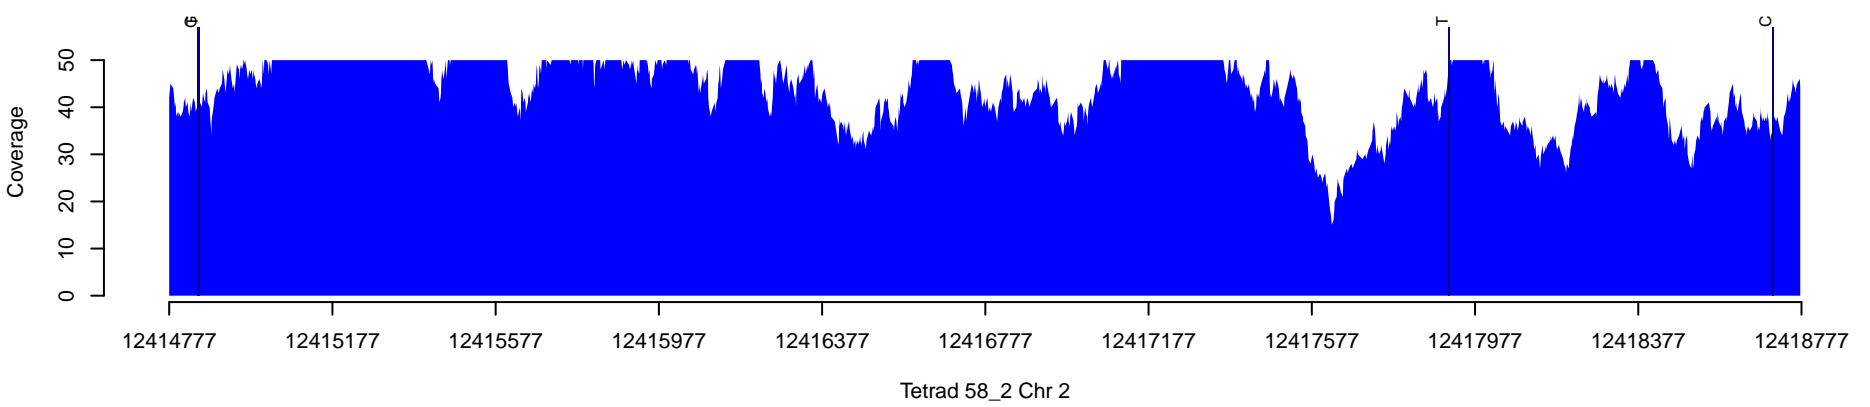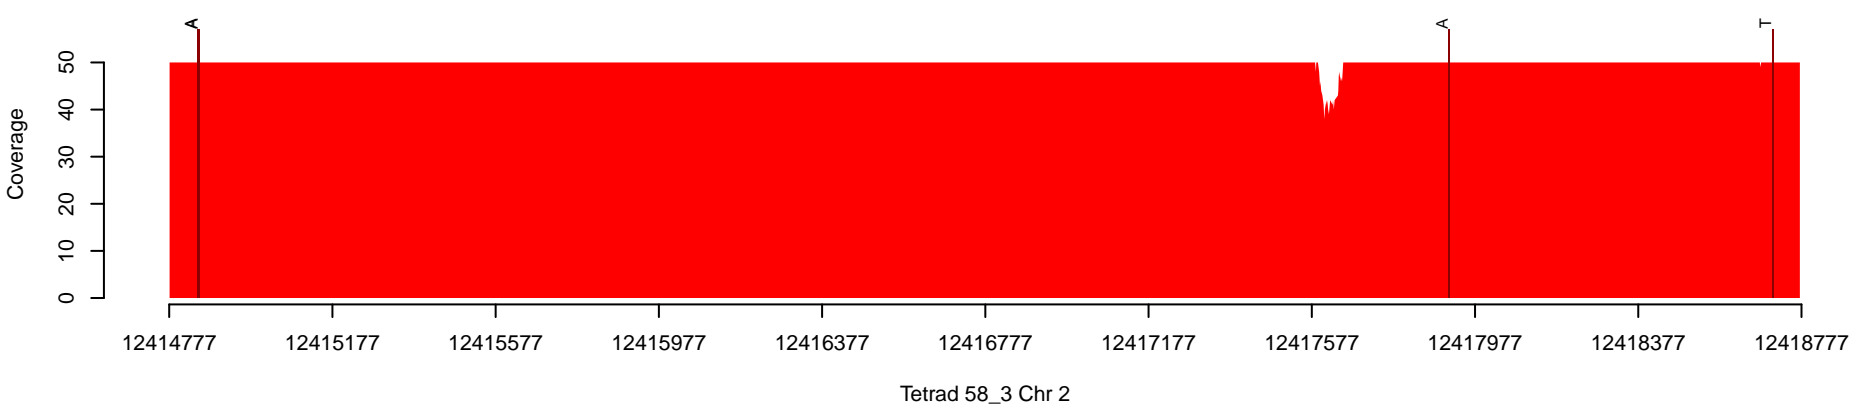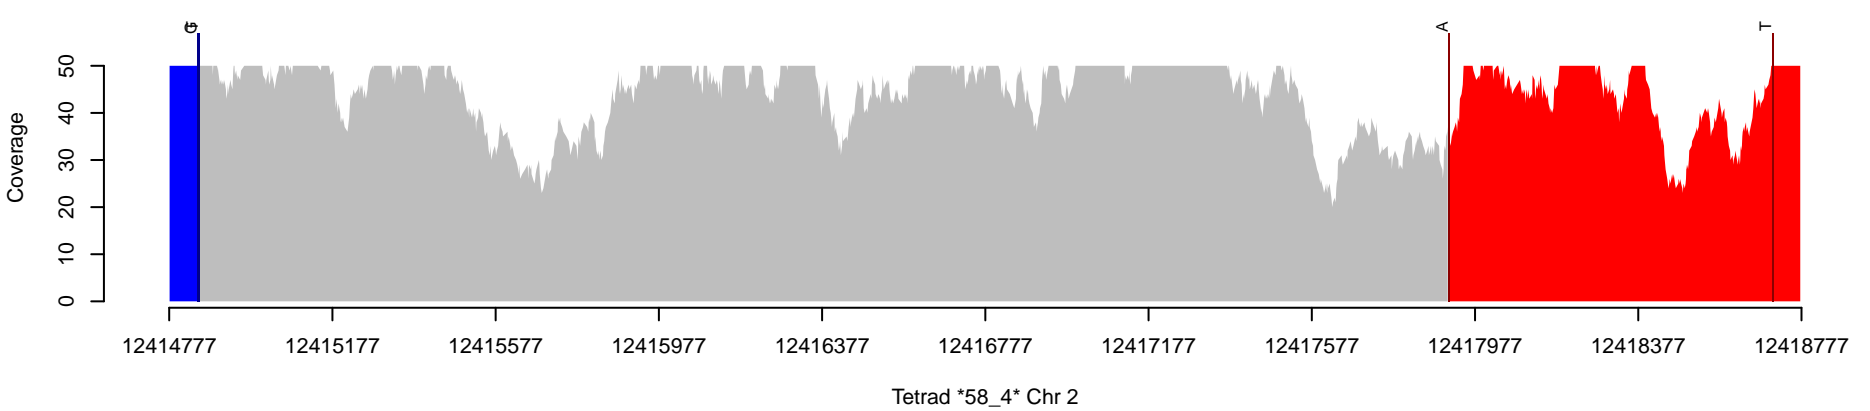

# ID36

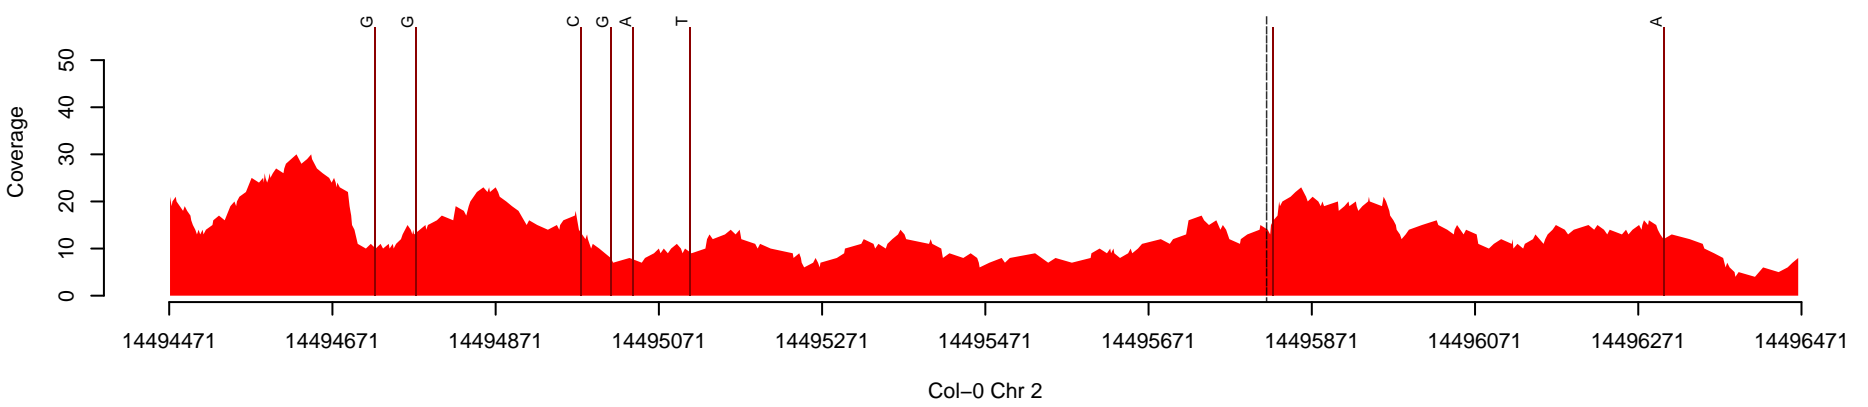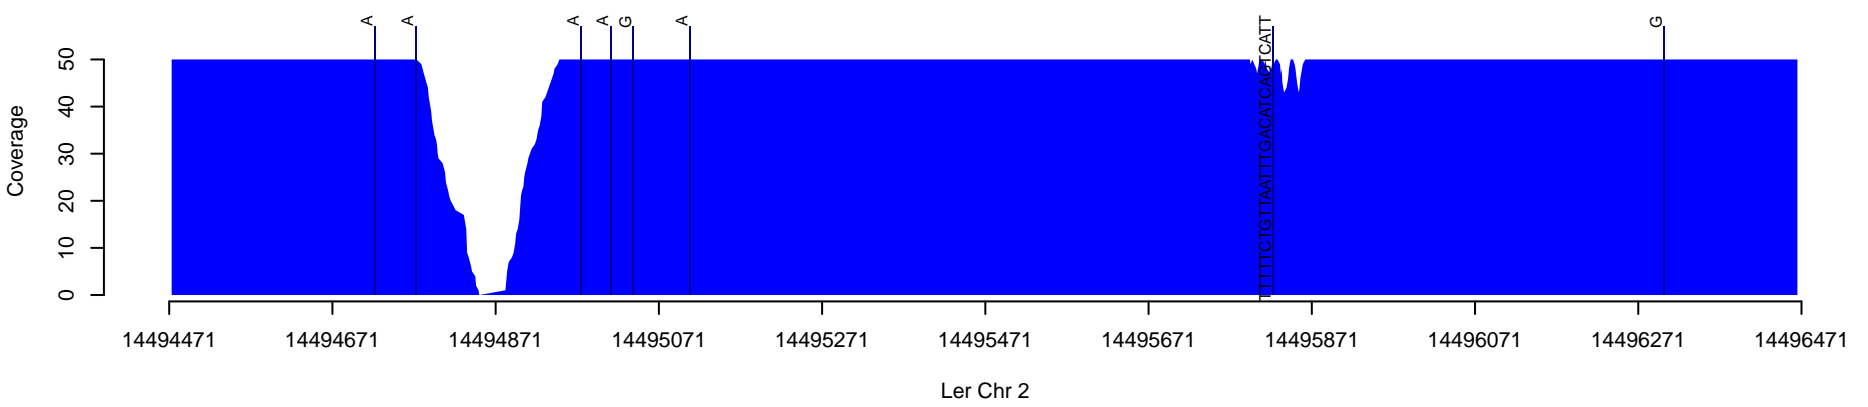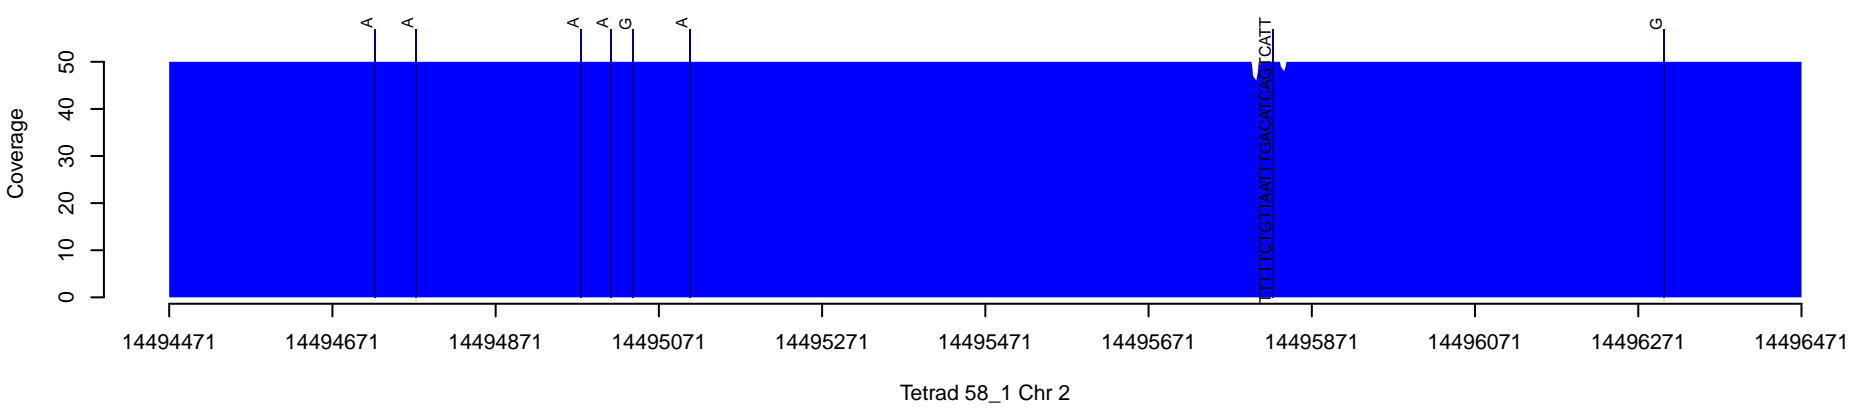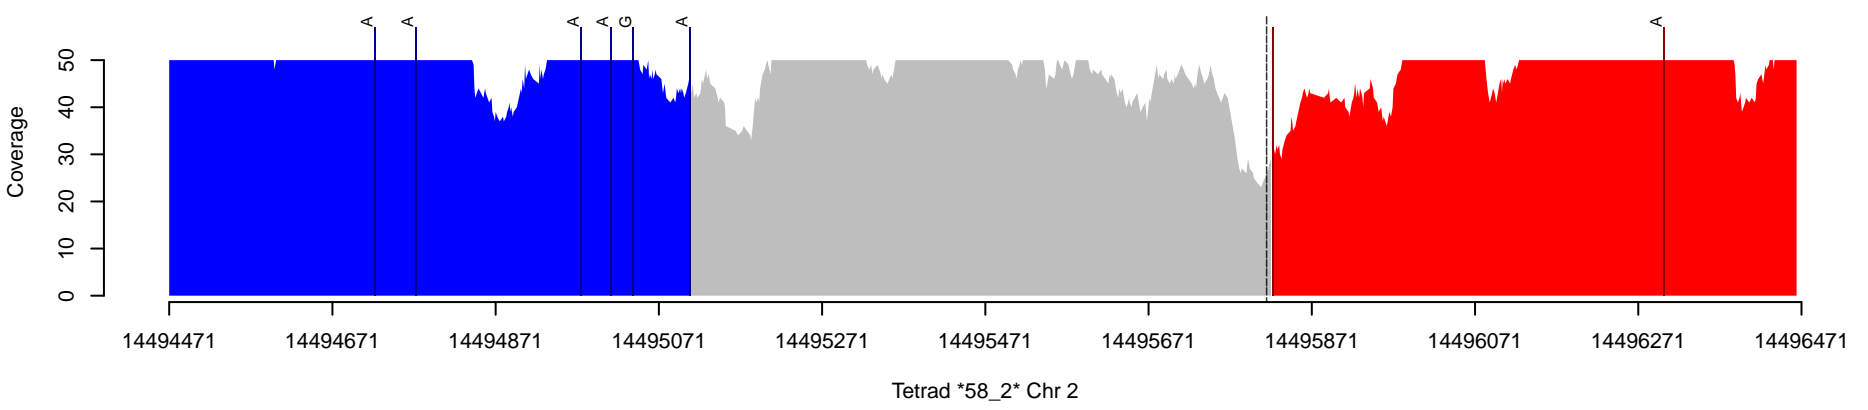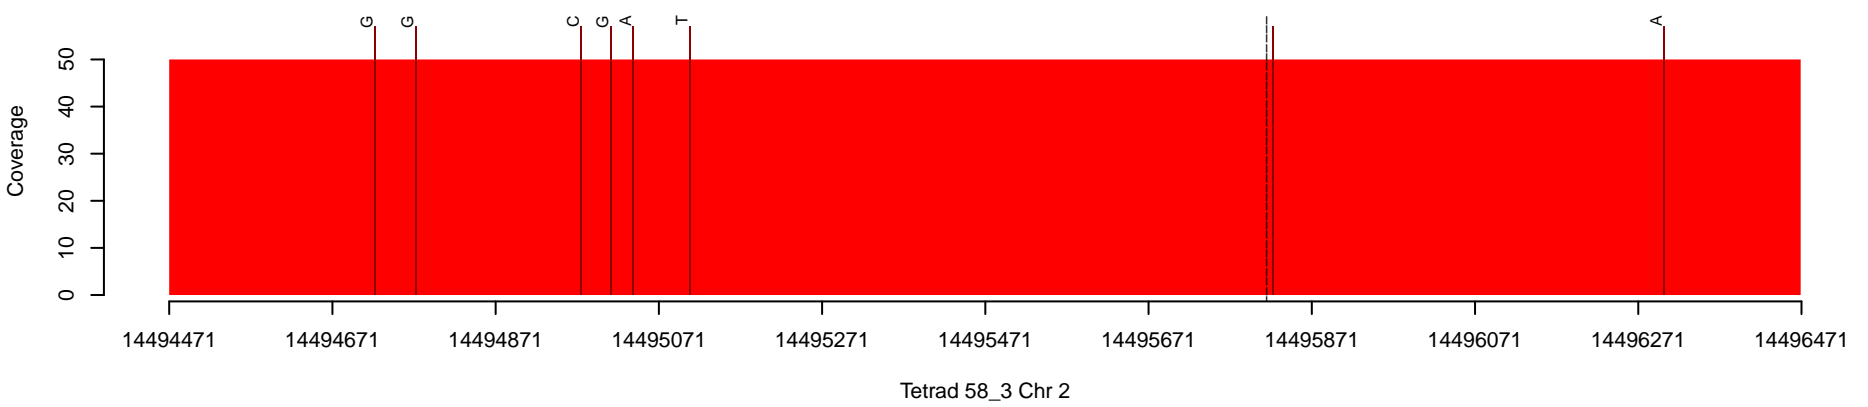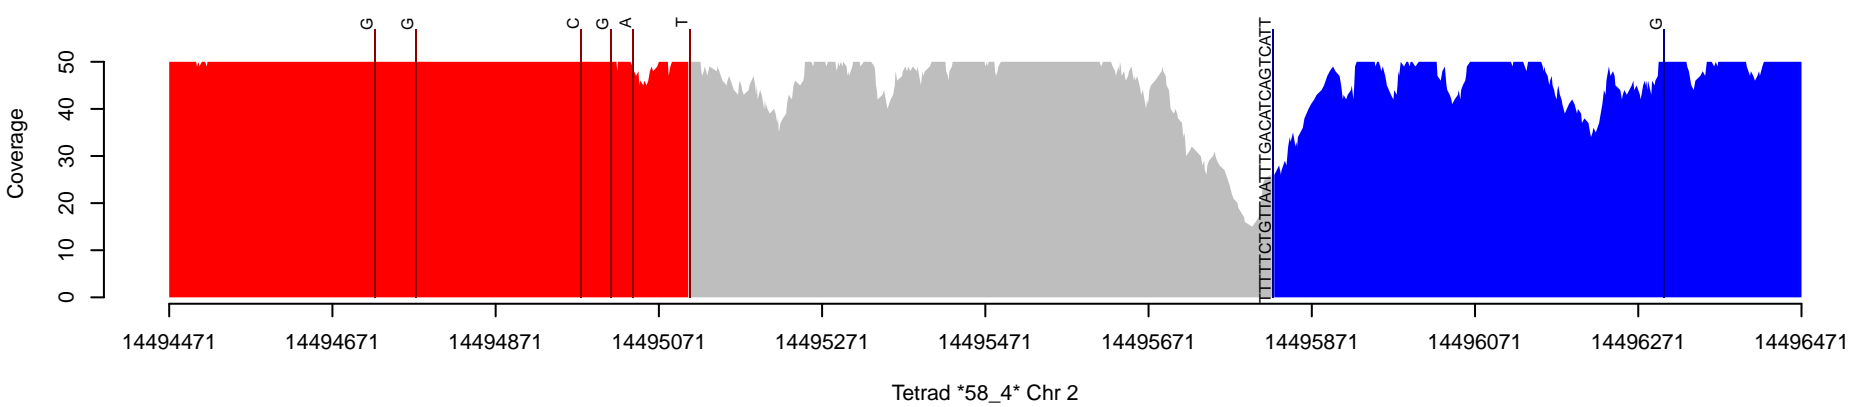

# ID37

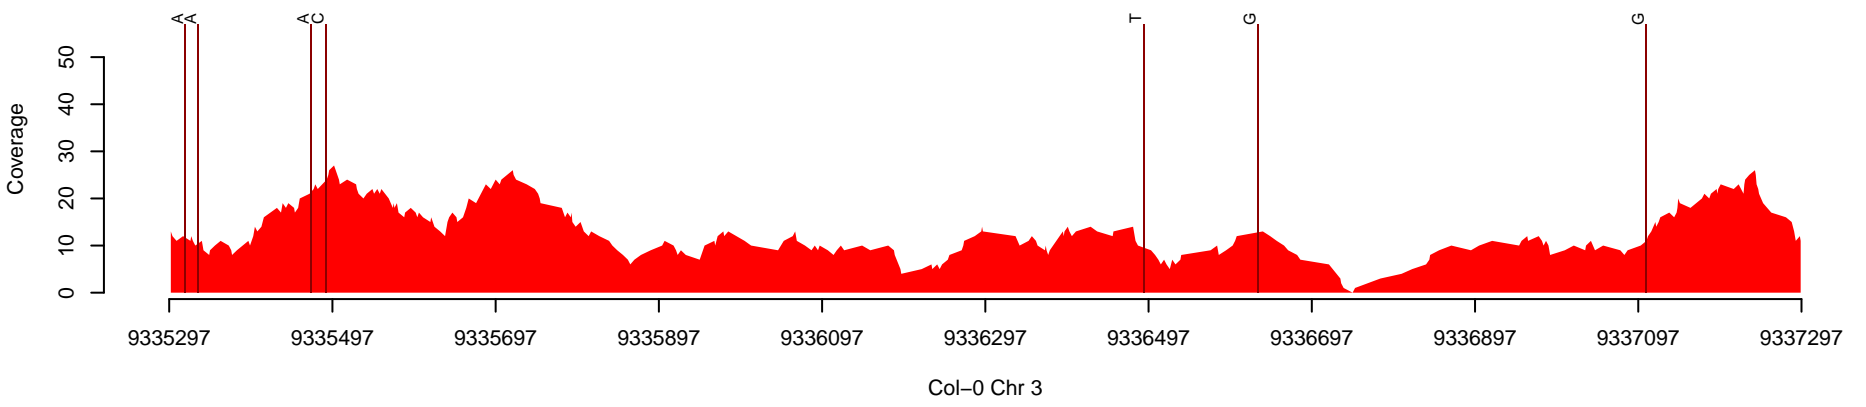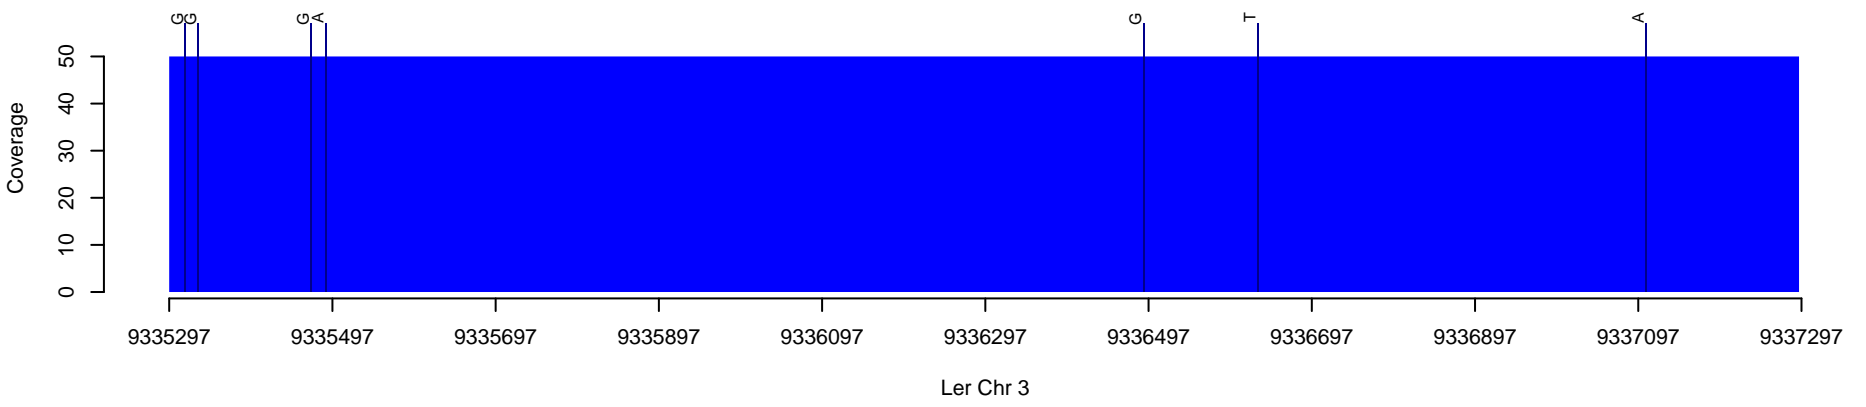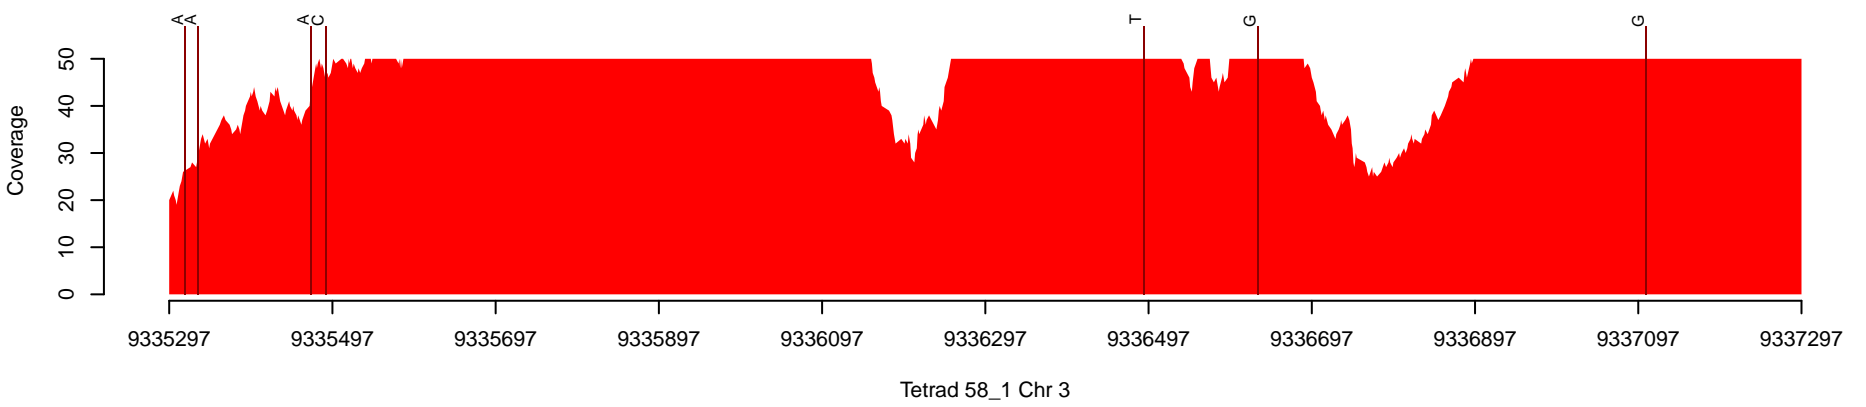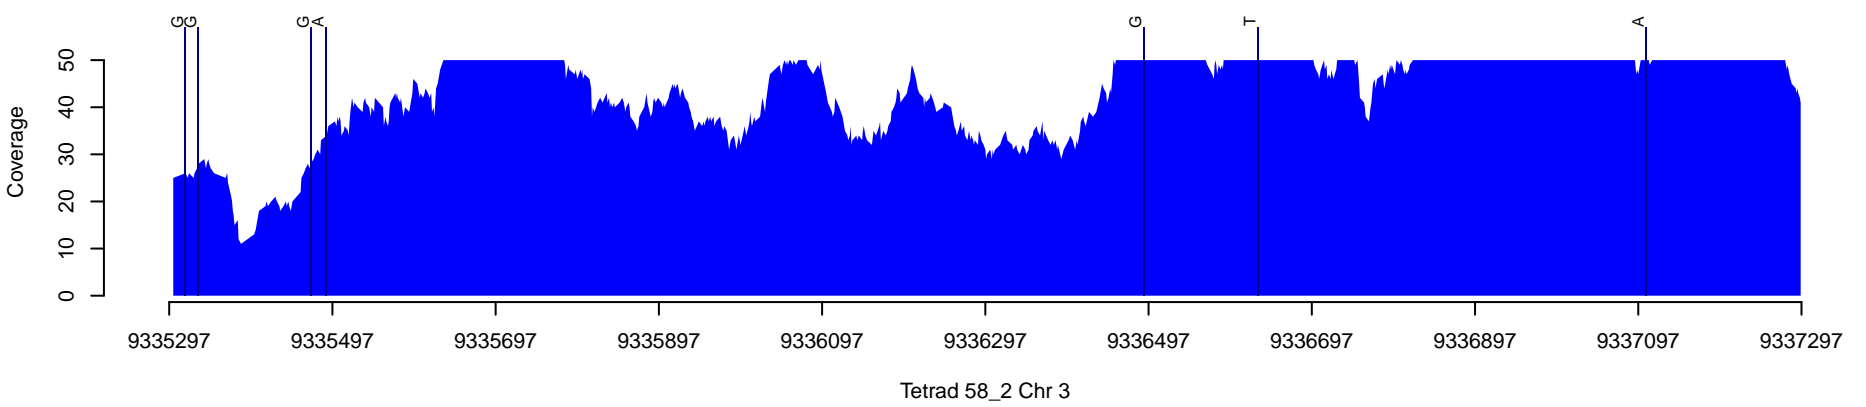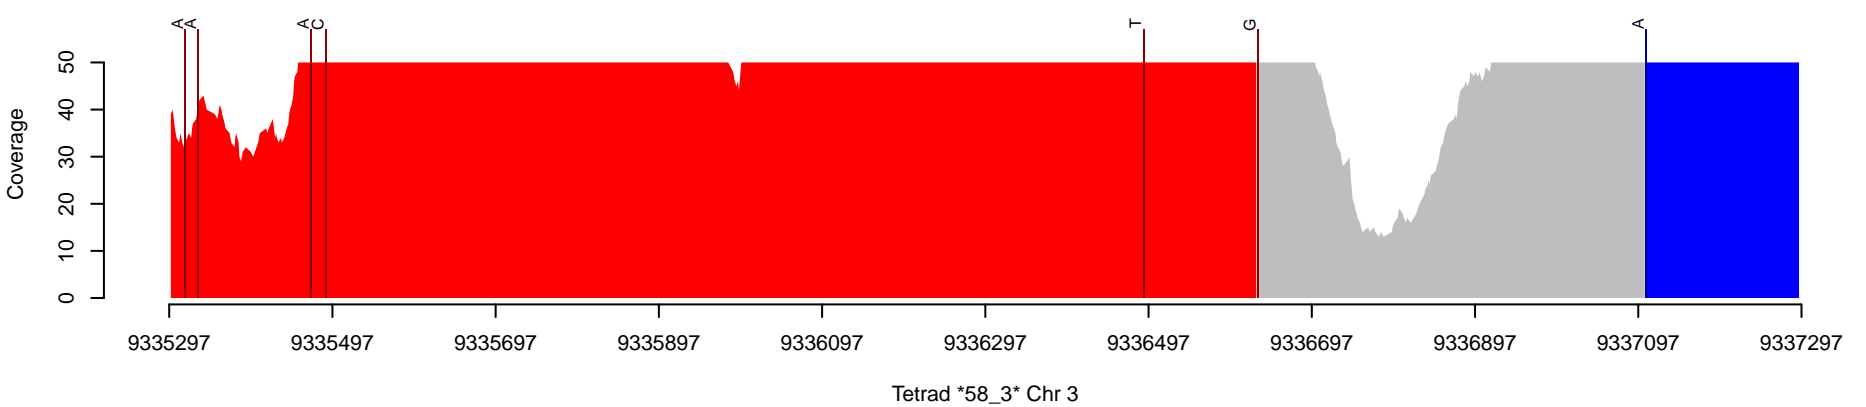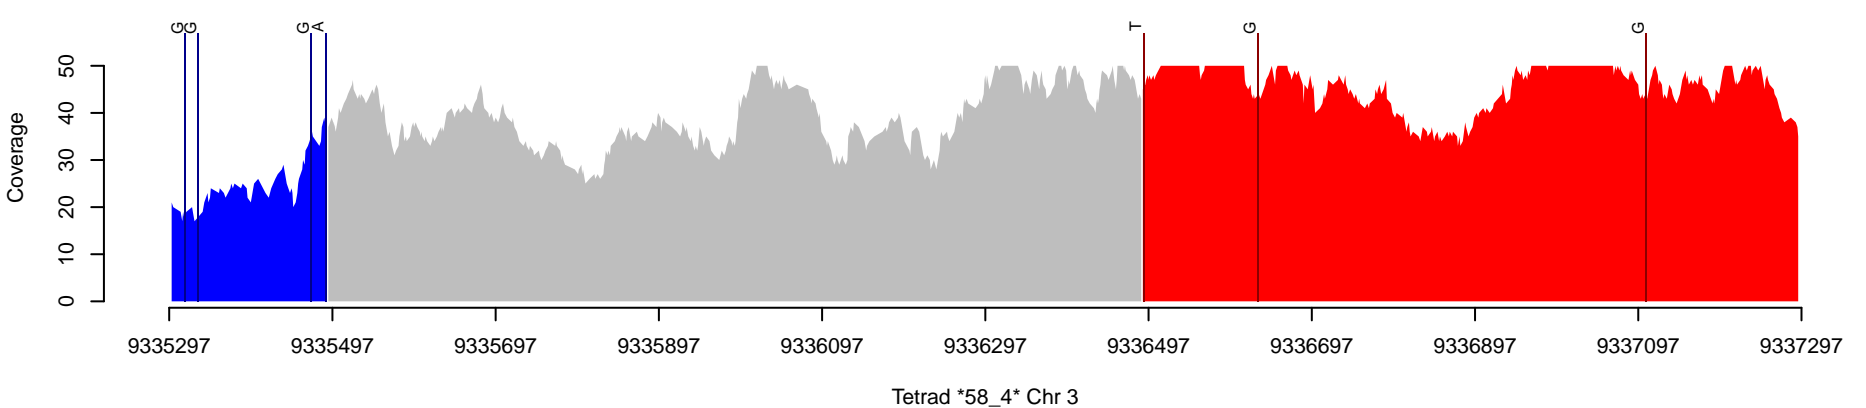

# ID38

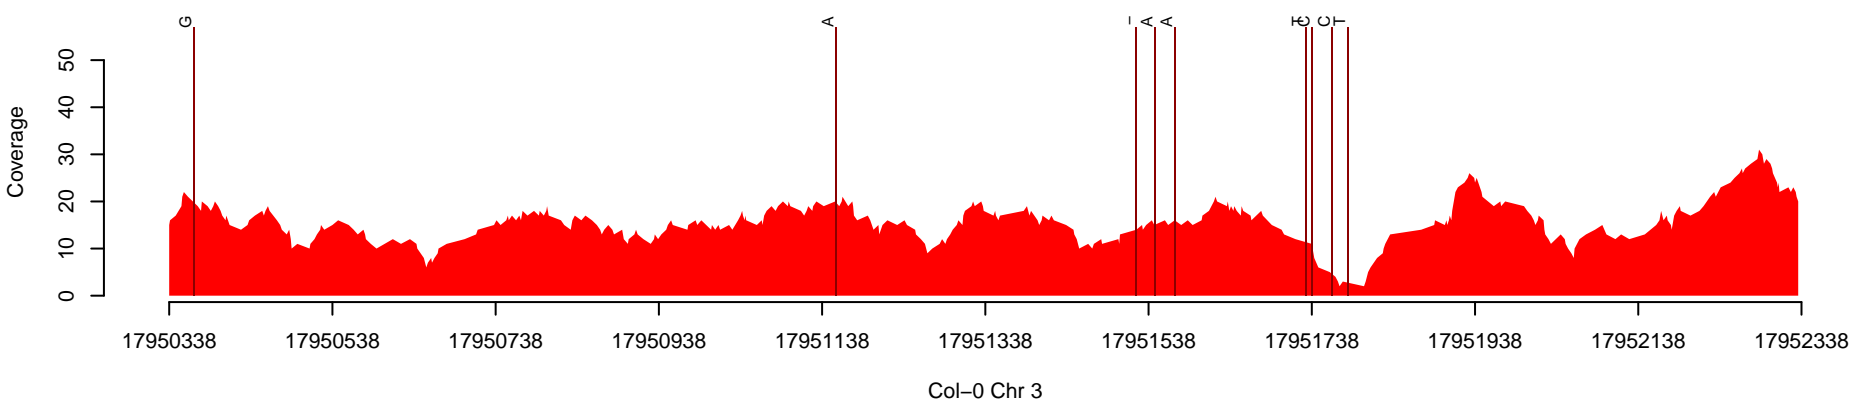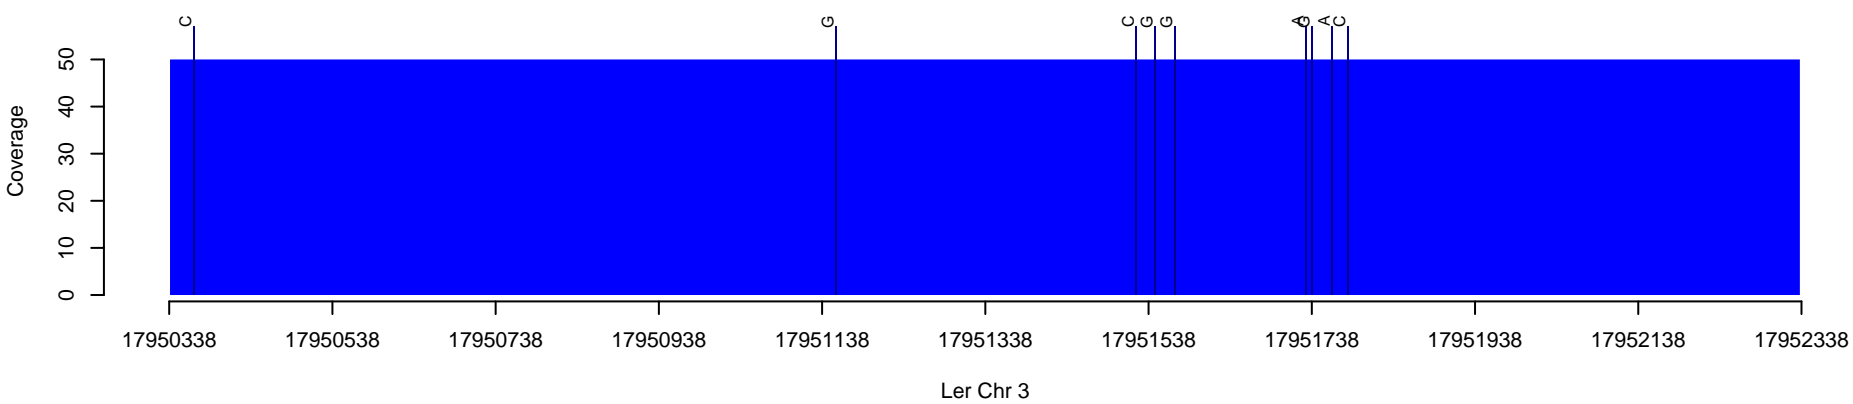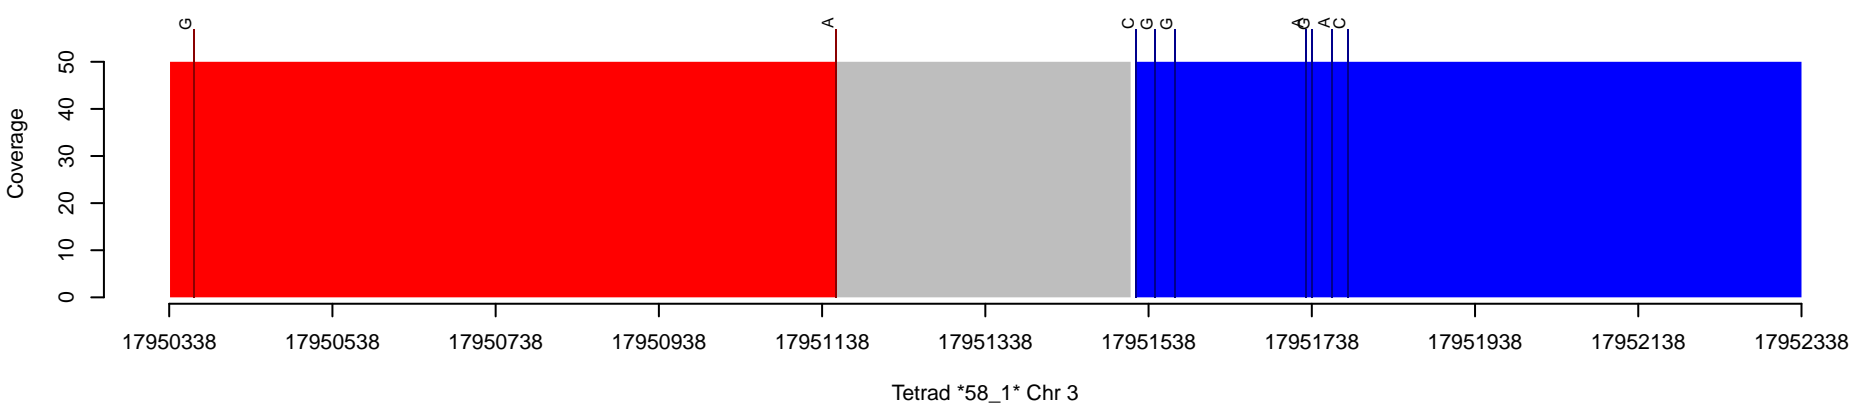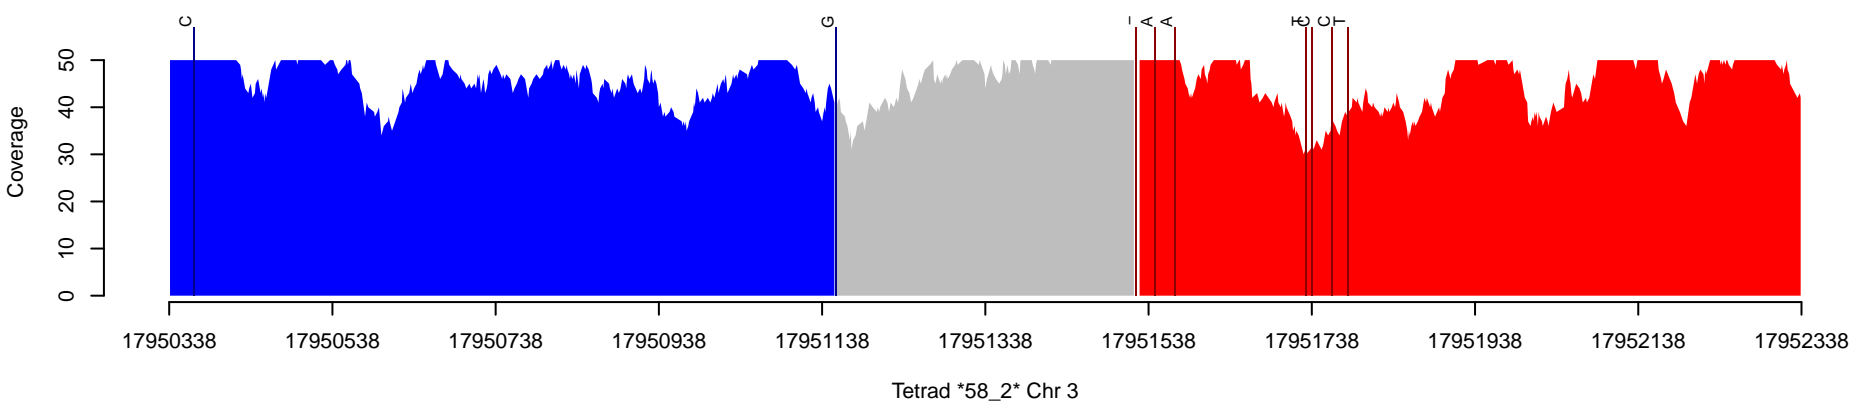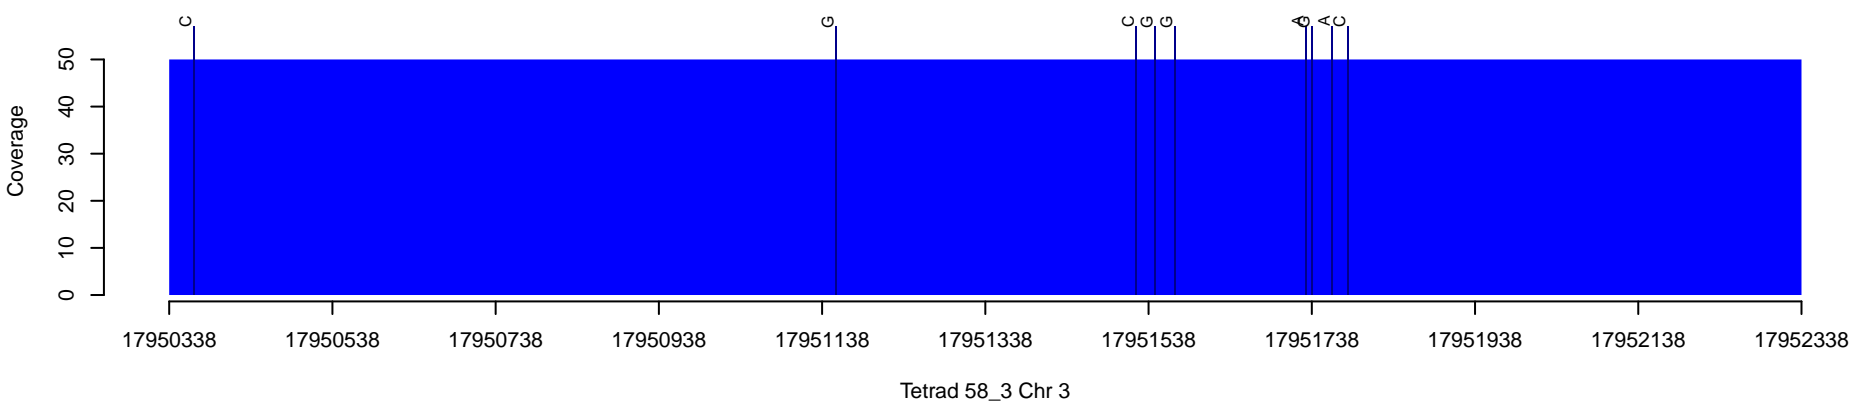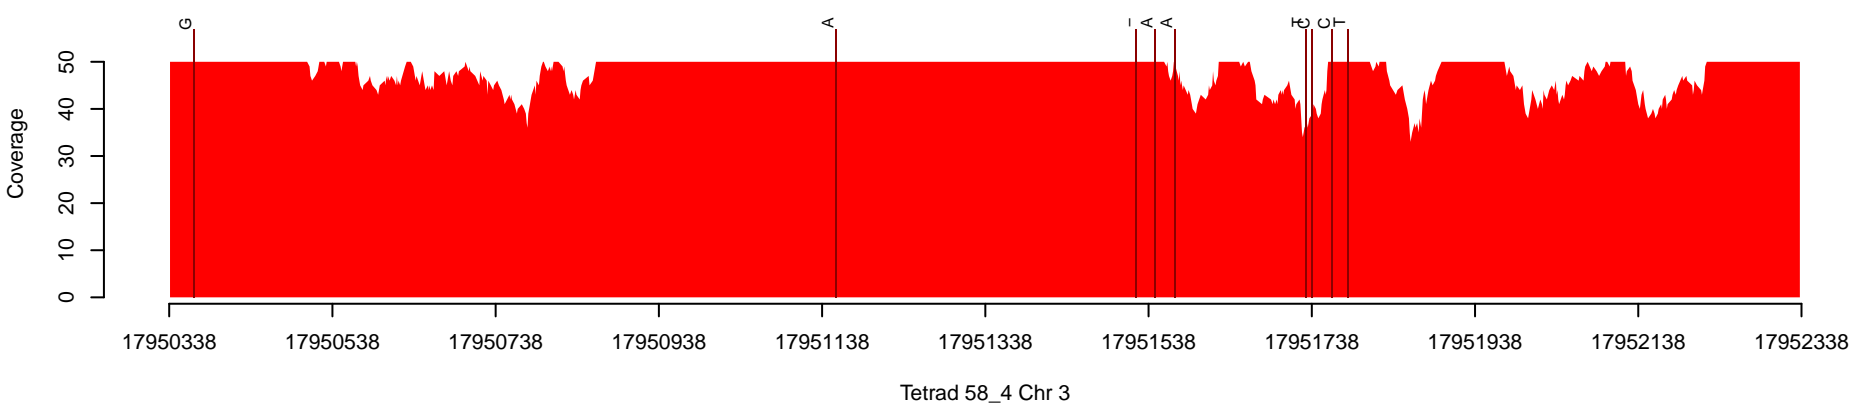

# ID39

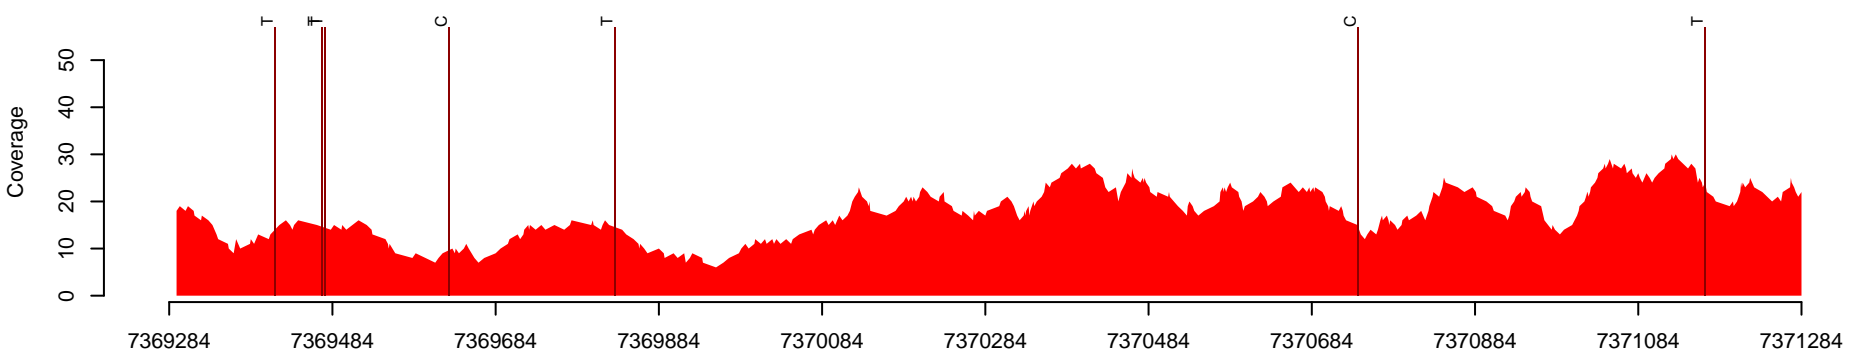

Col-0 Chr 4

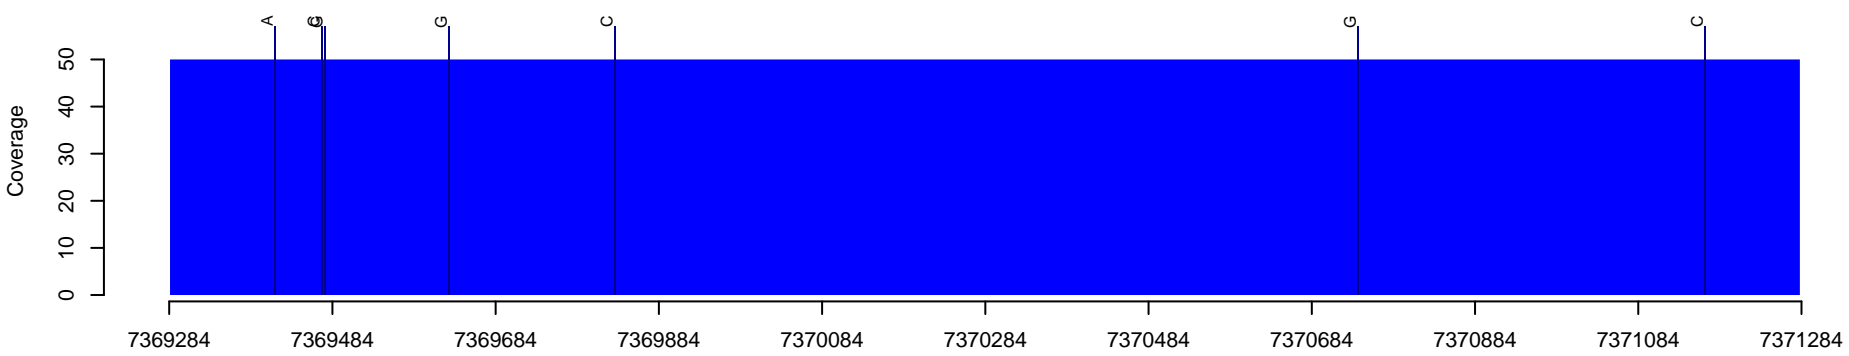

Ler Chr 4

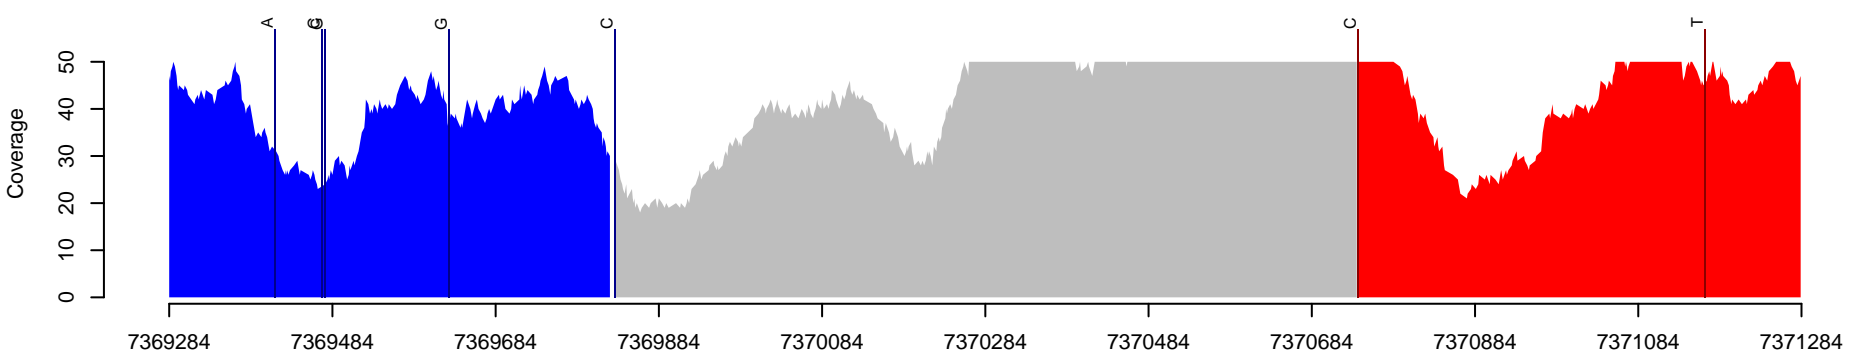

Tetrad \*58\_1\* Chr 4

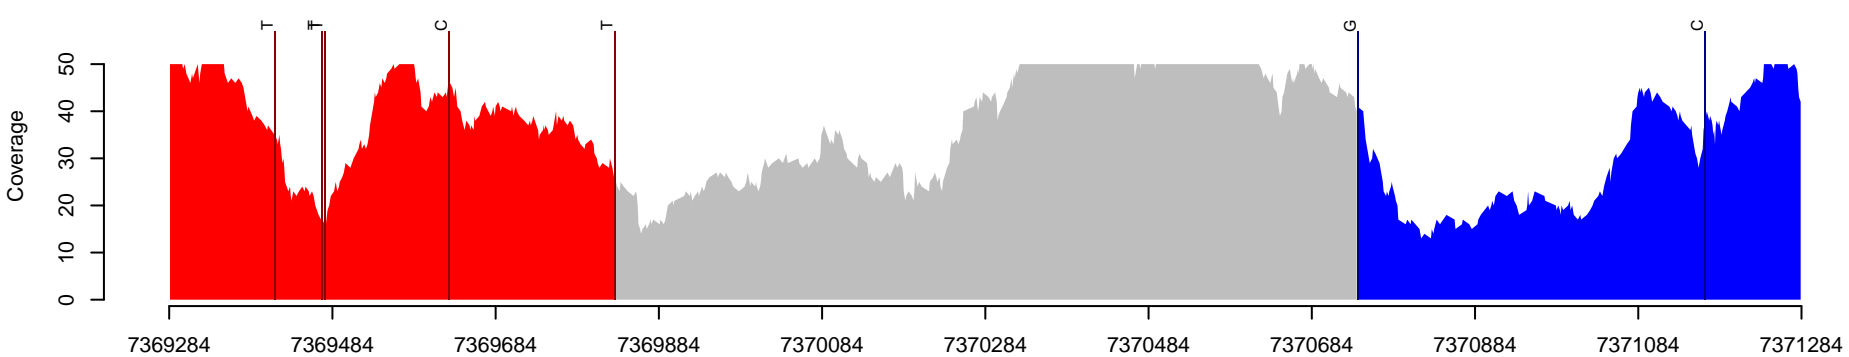

Tetrad \*58\_2\* Chr 4

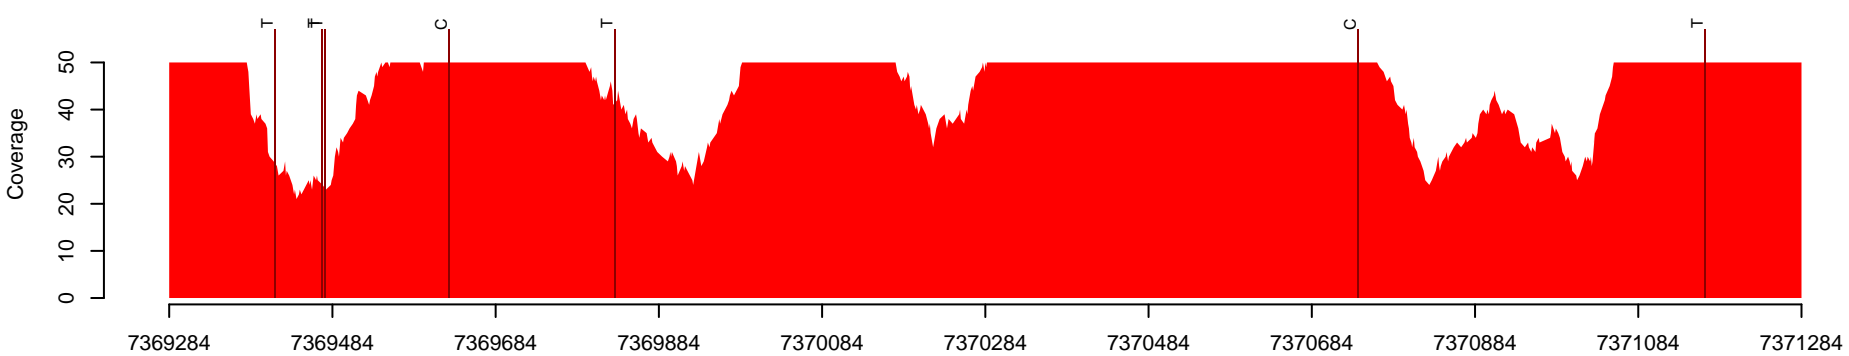

Tetrad 58\_3 Chr 4

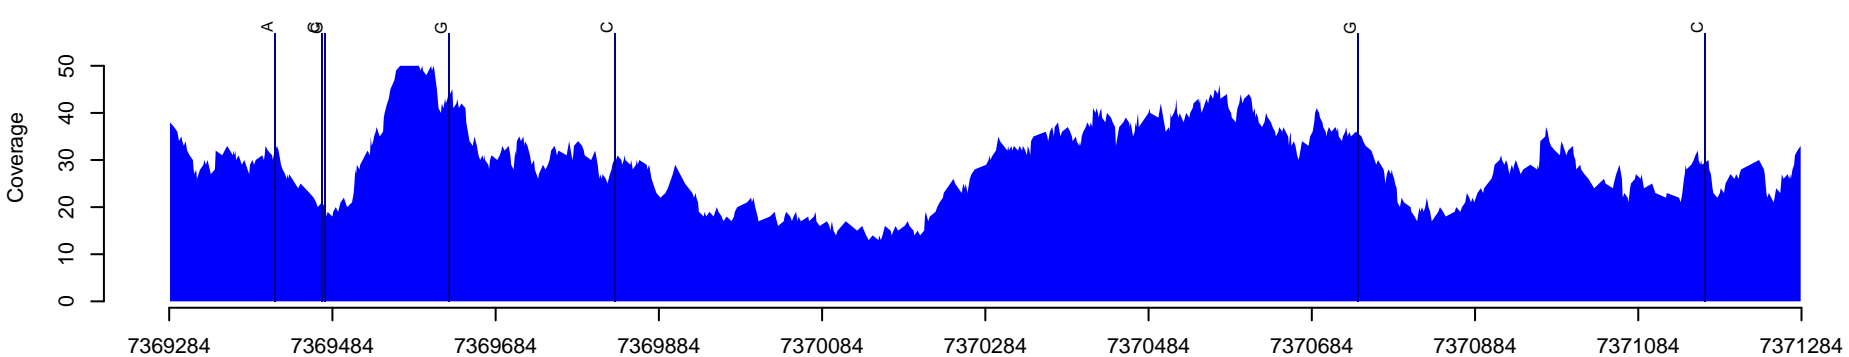

Tetrad 58\_4 Chr 4

# ID40

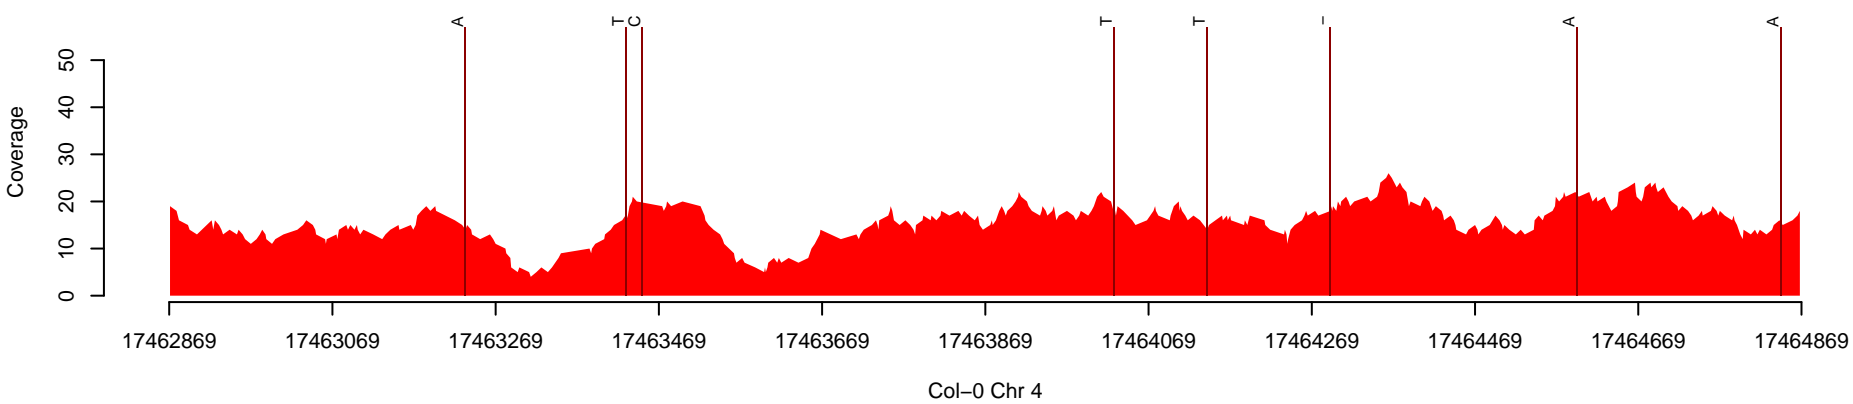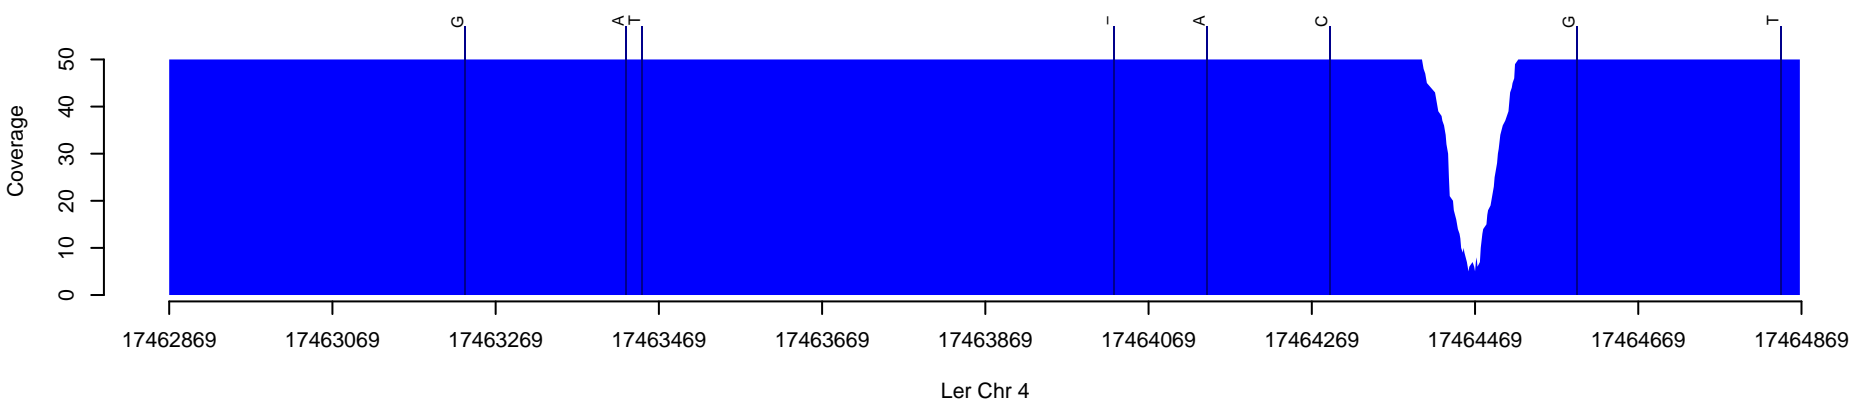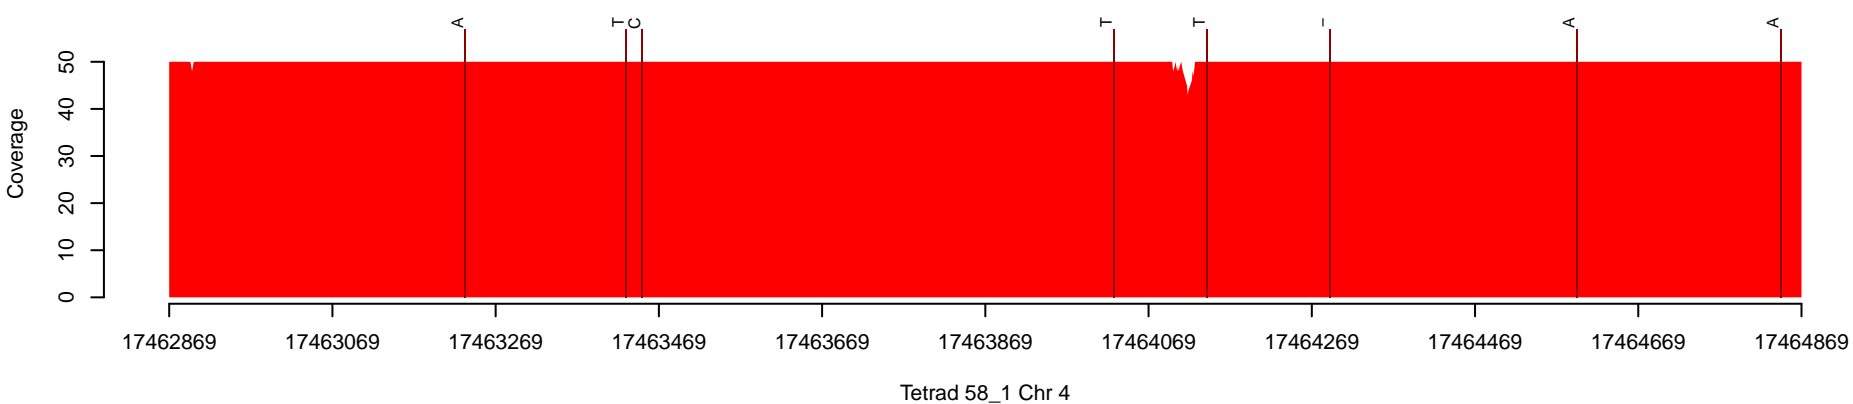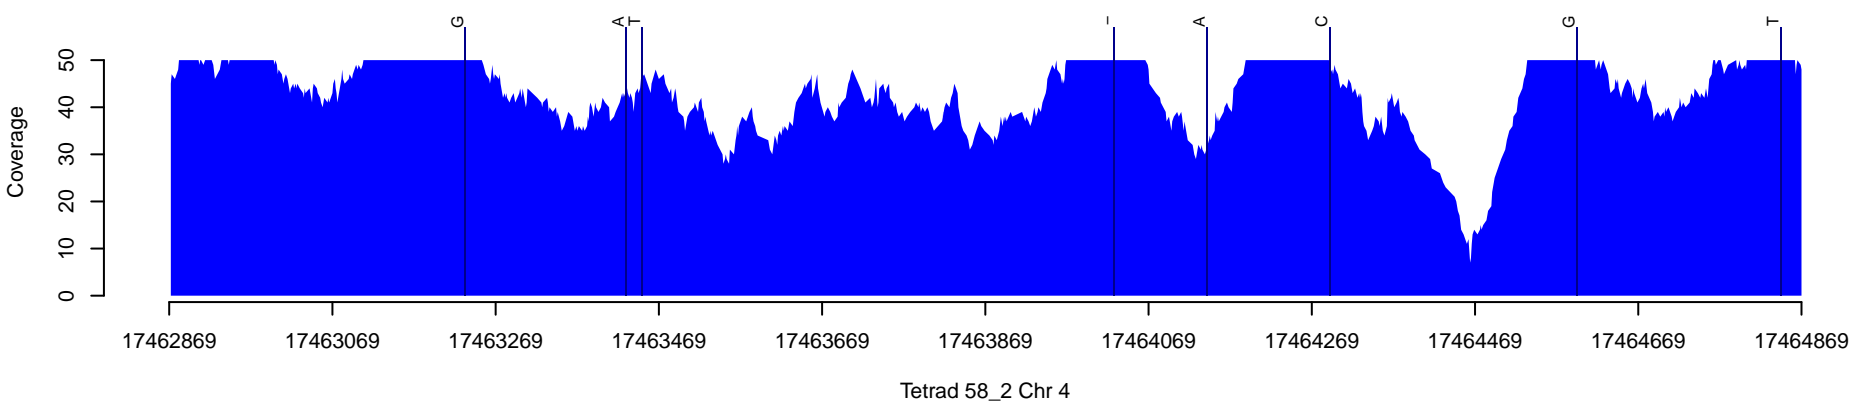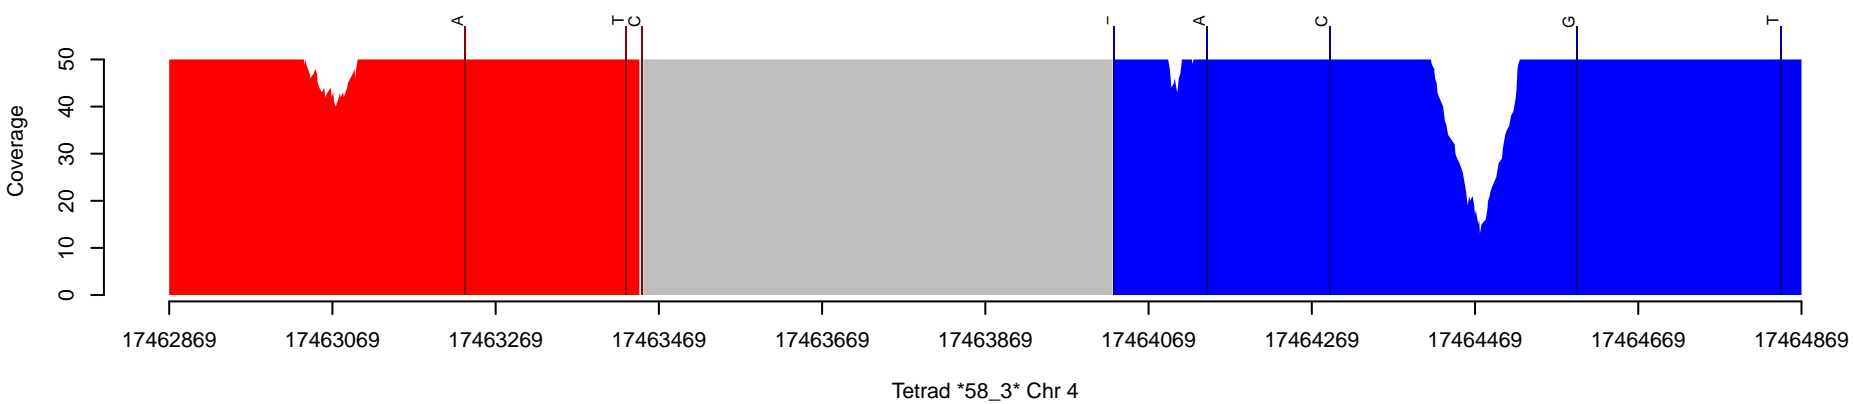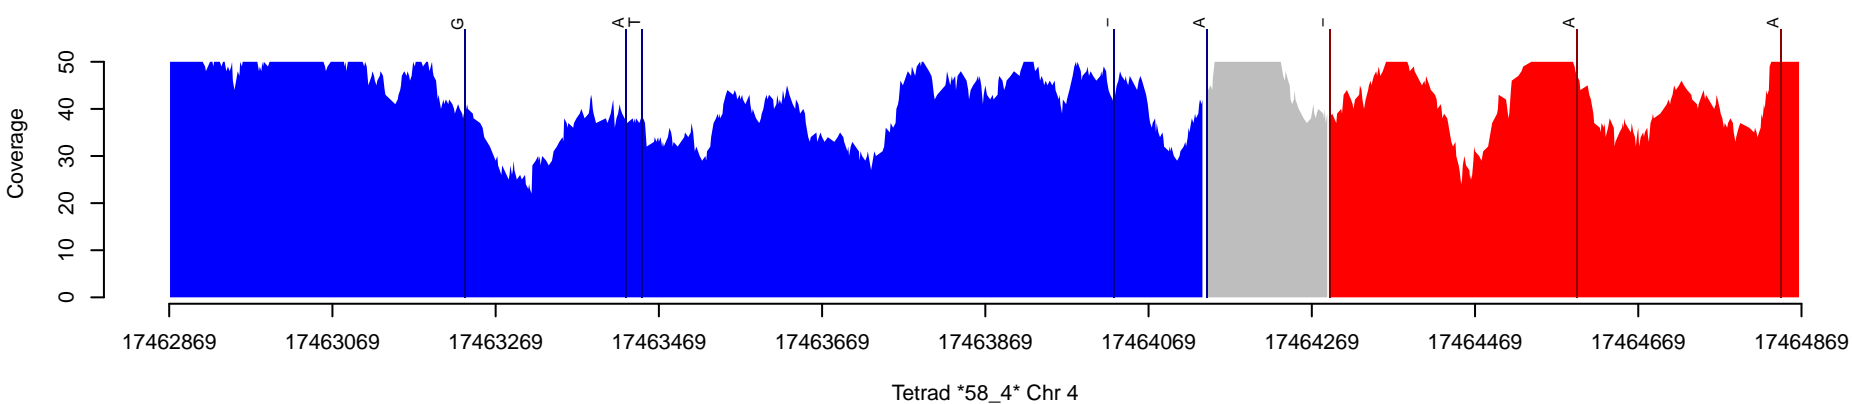



# ID41

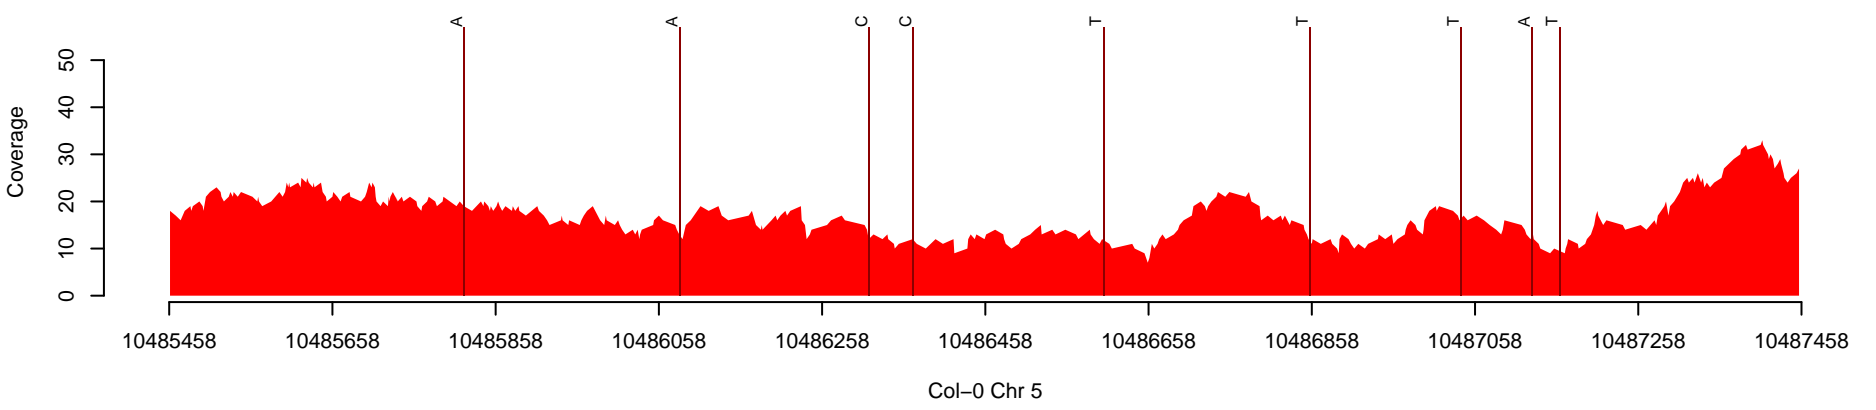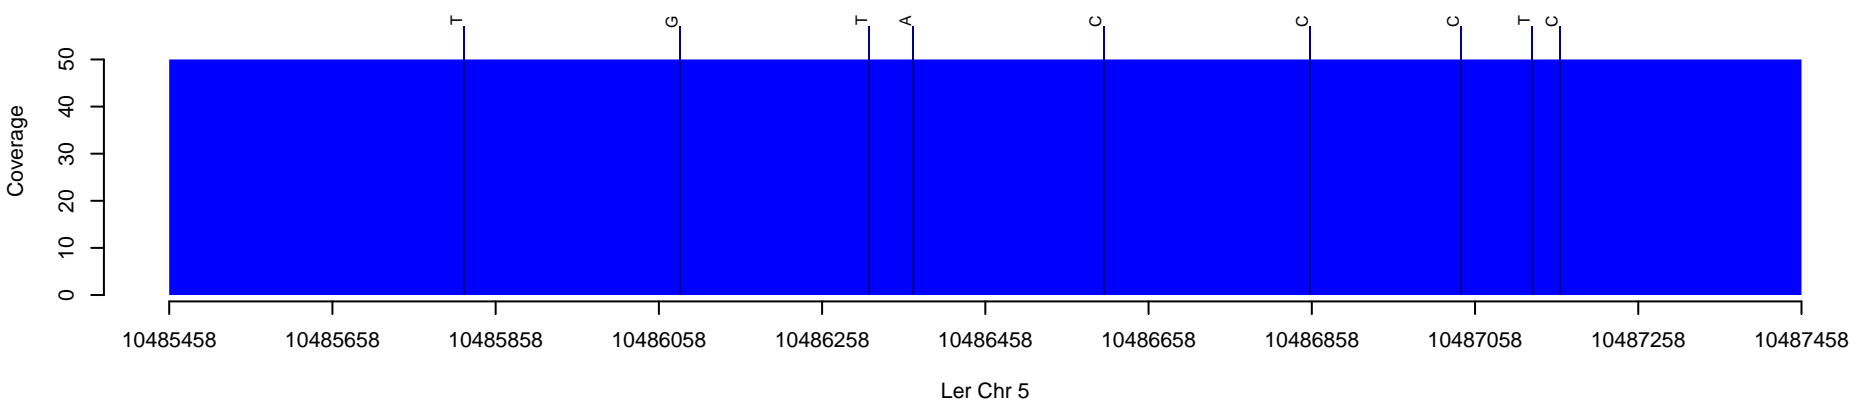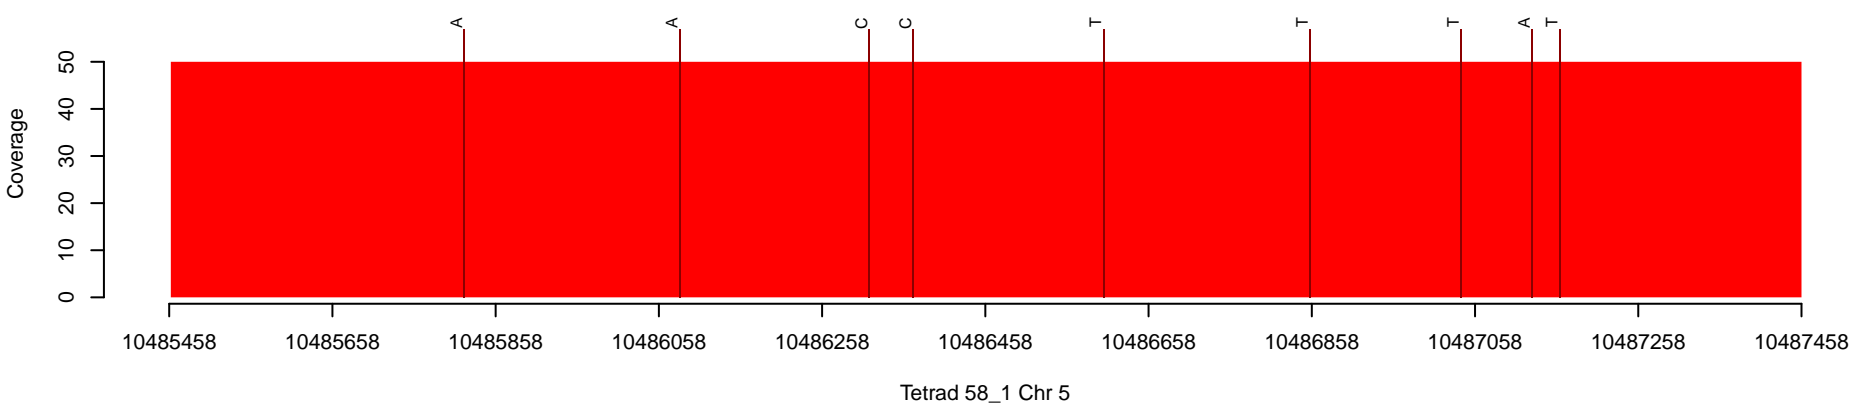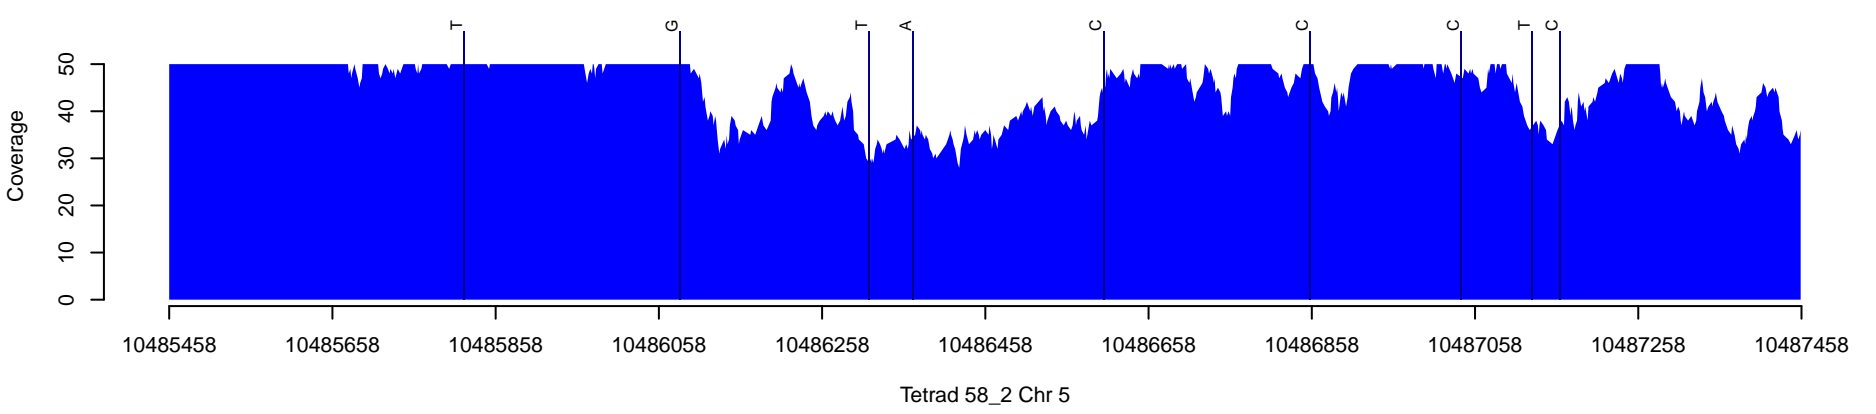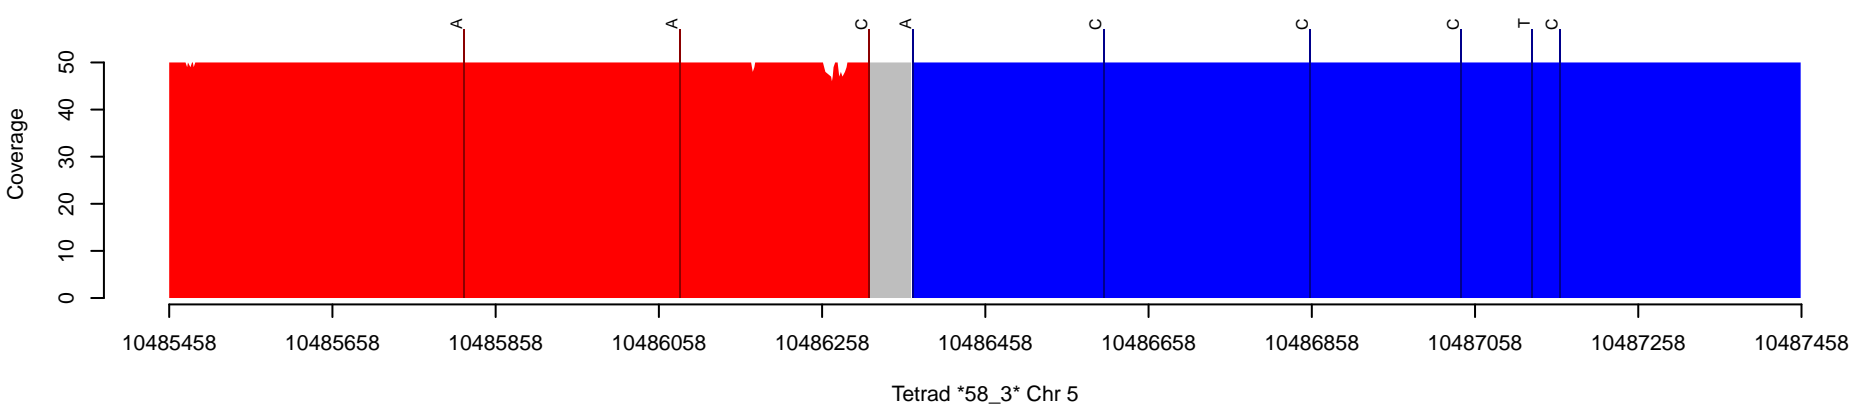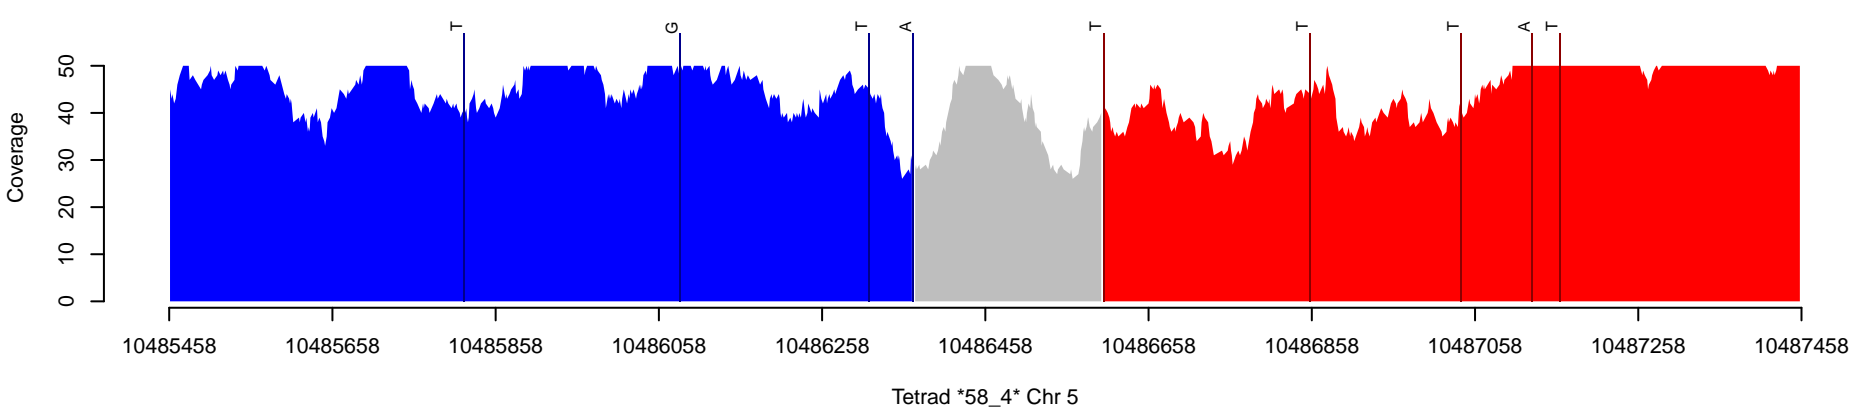

# ID42

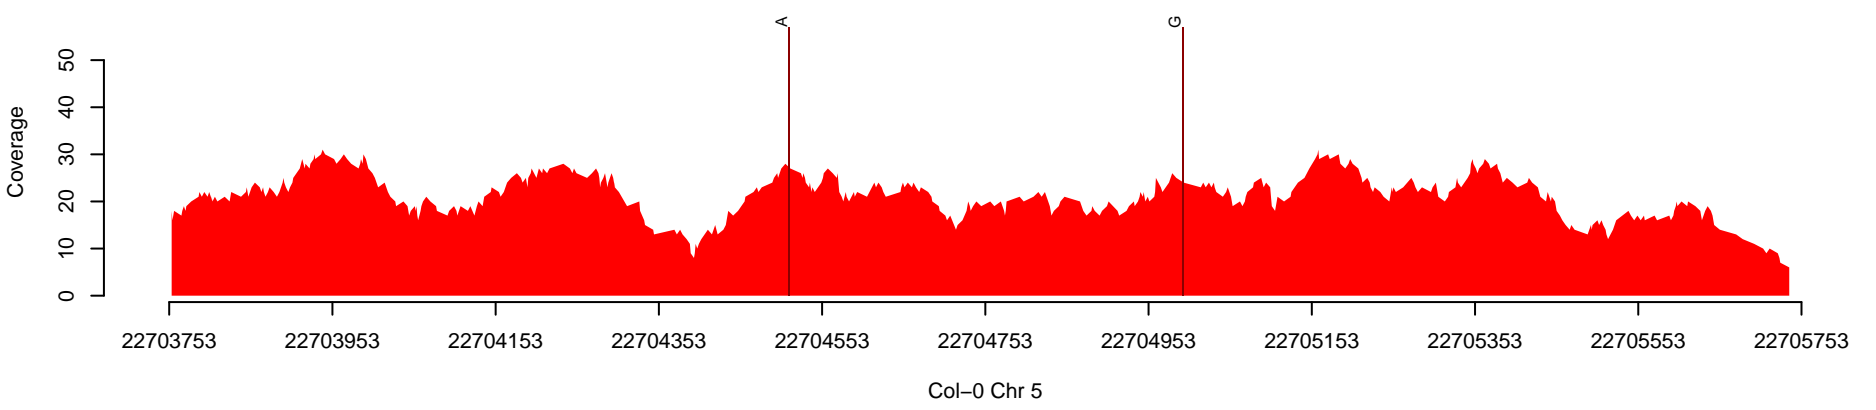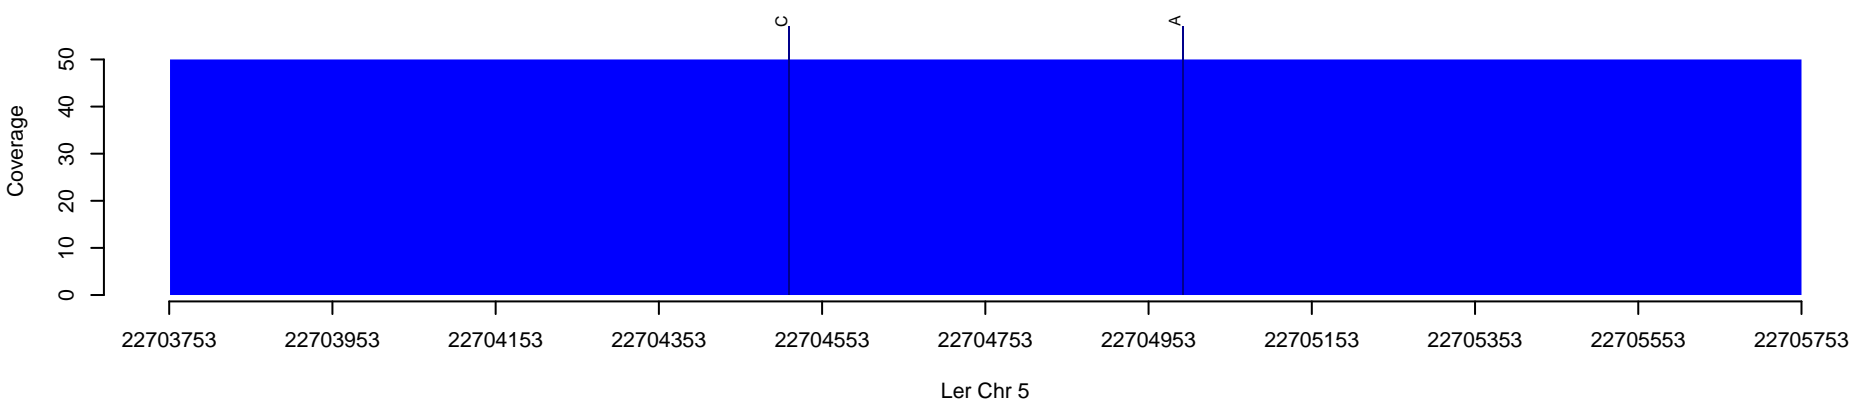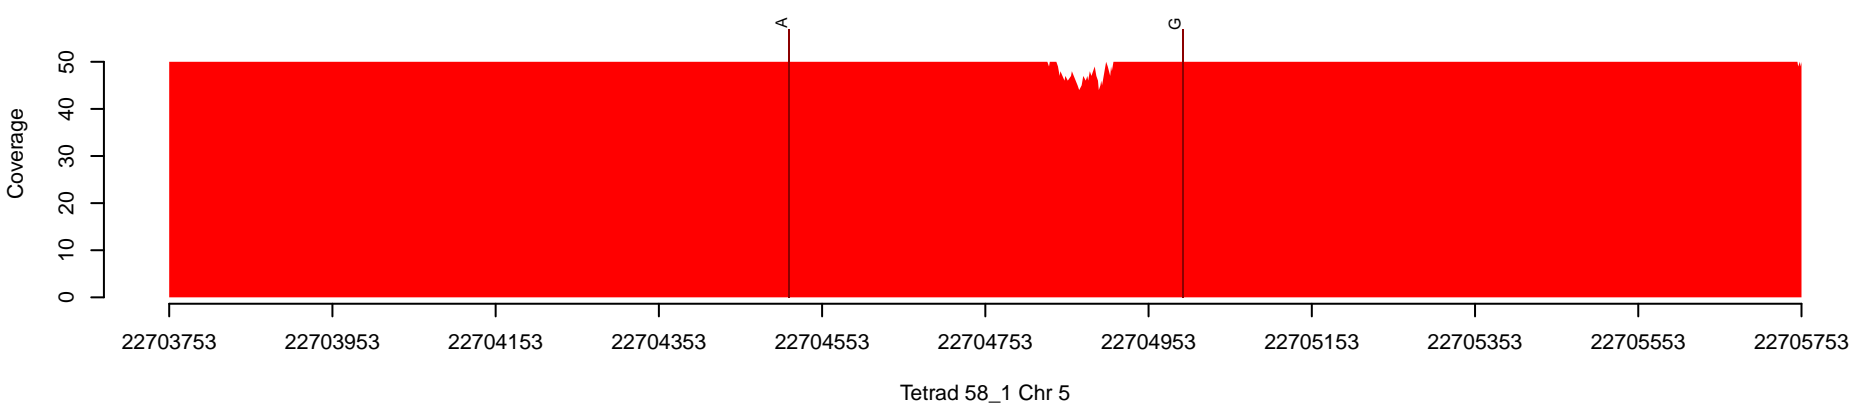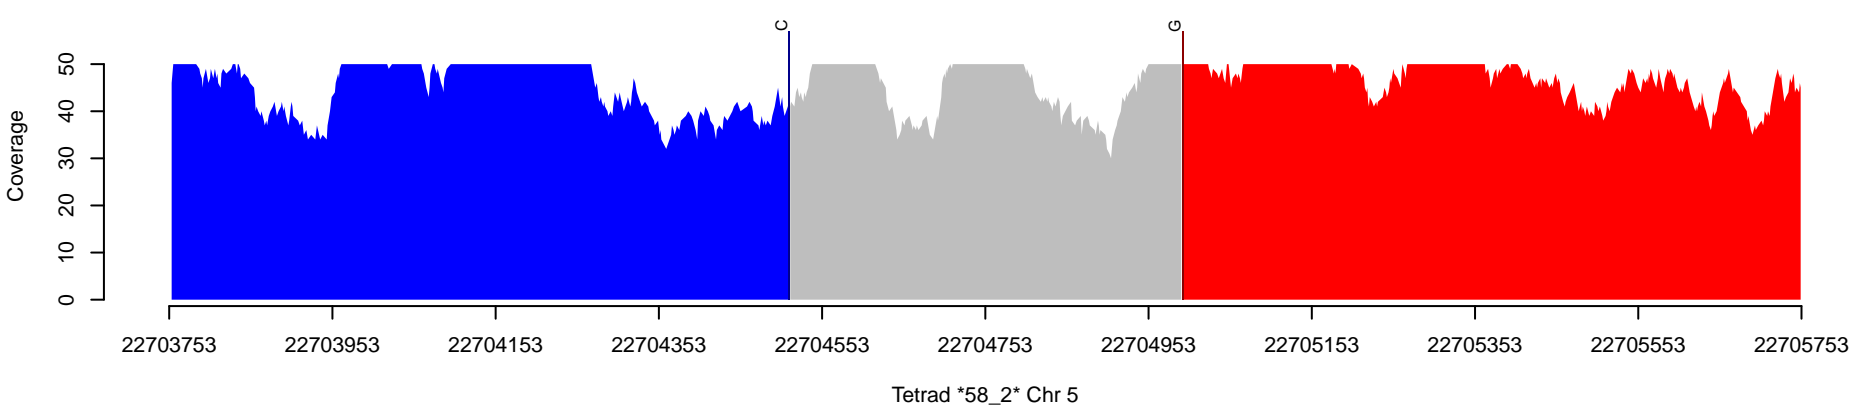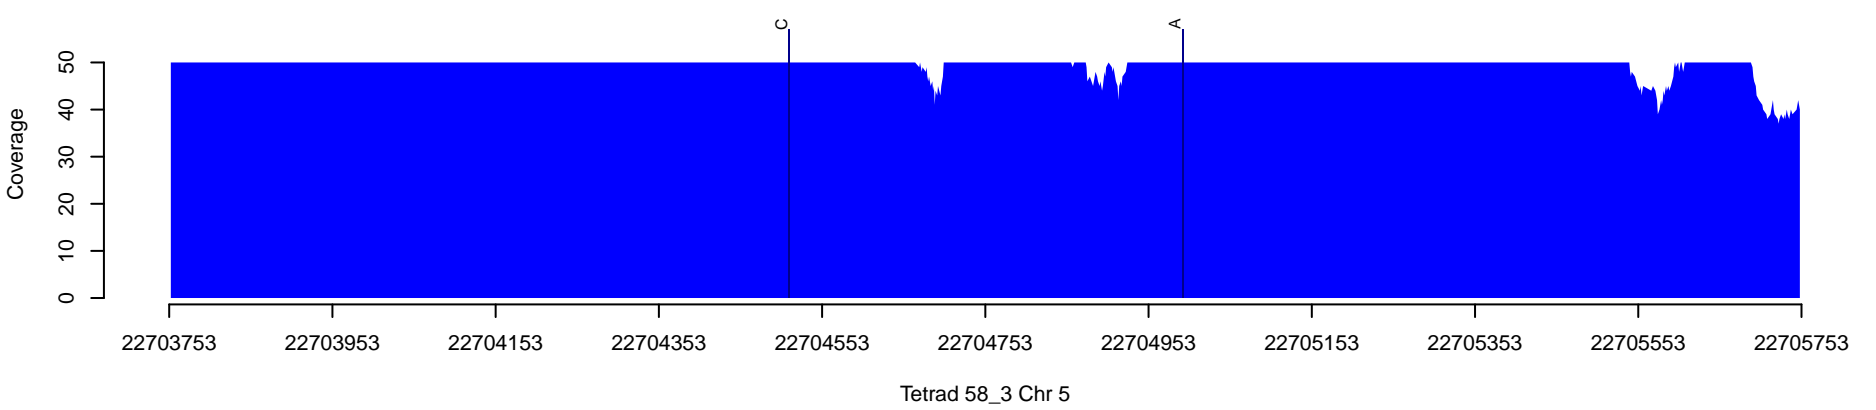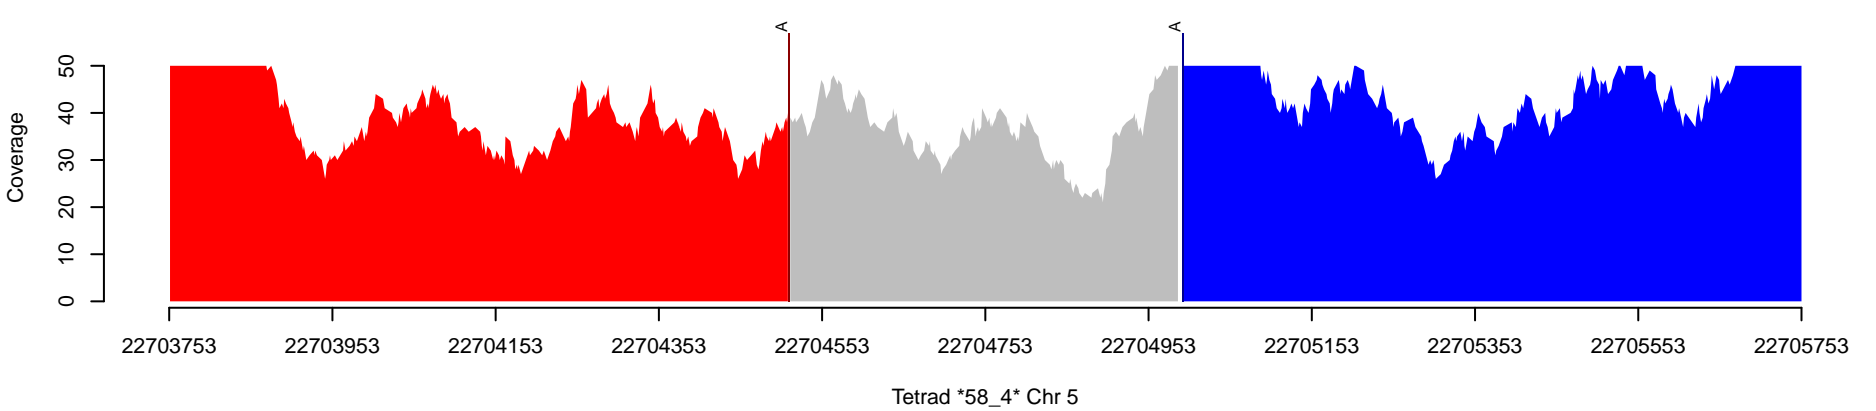

# ID43

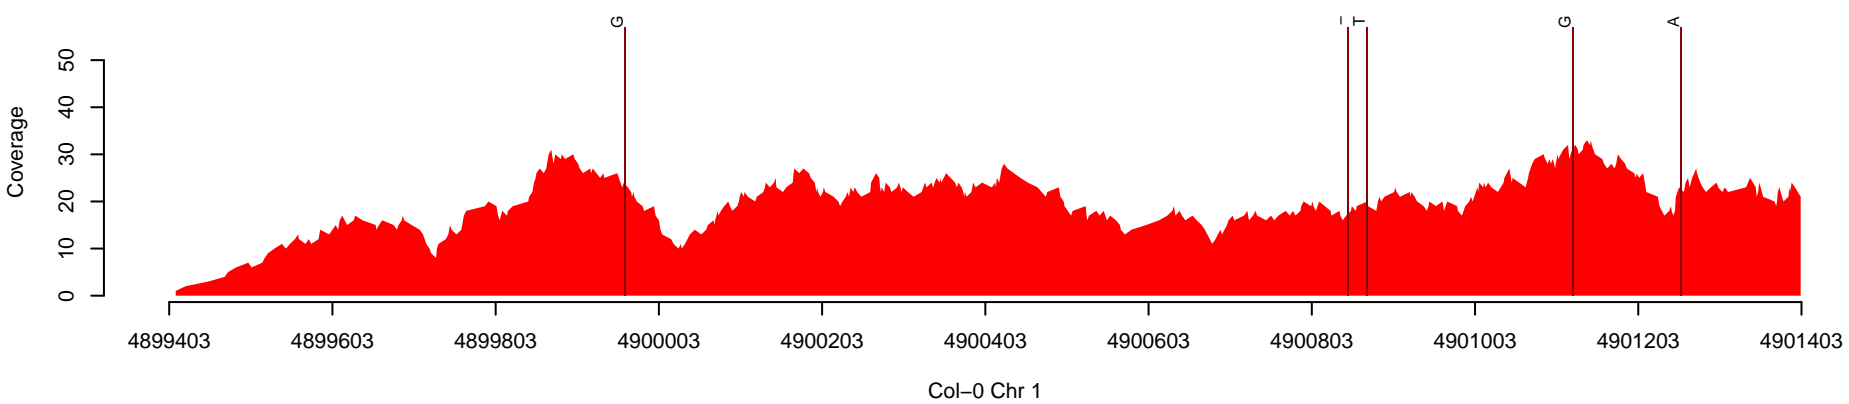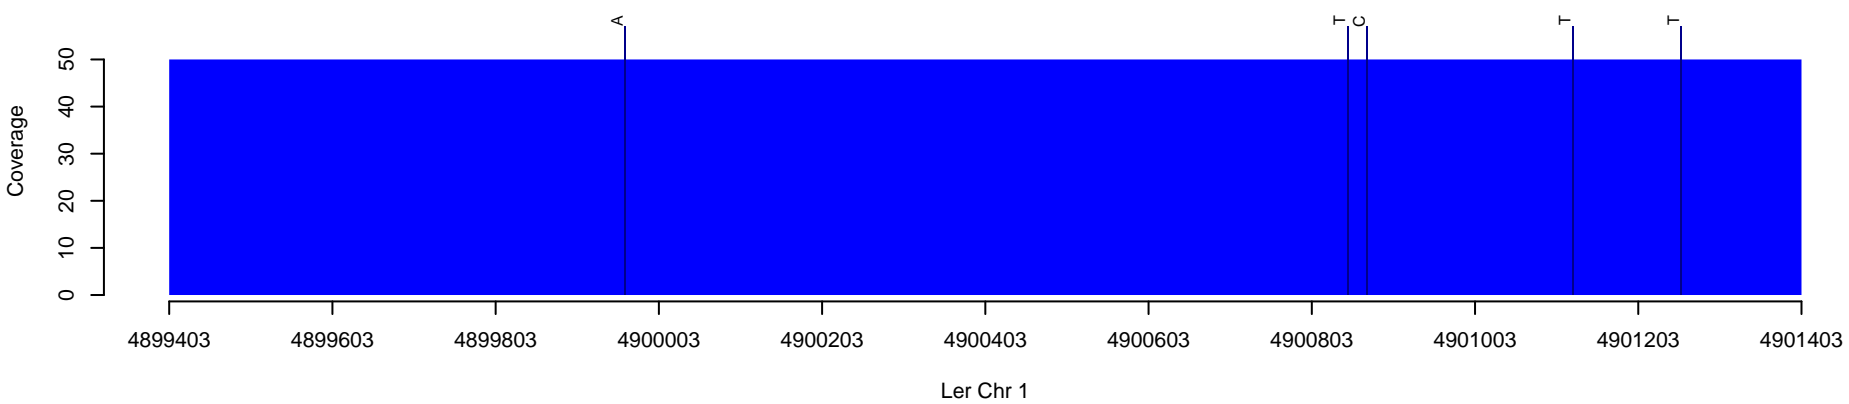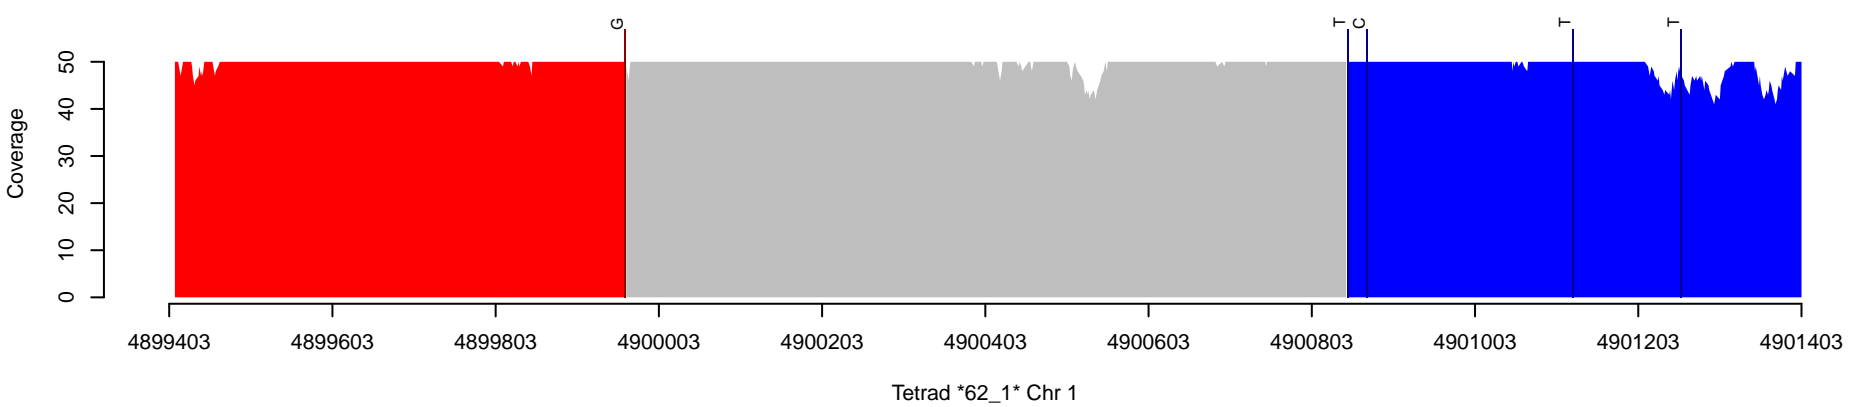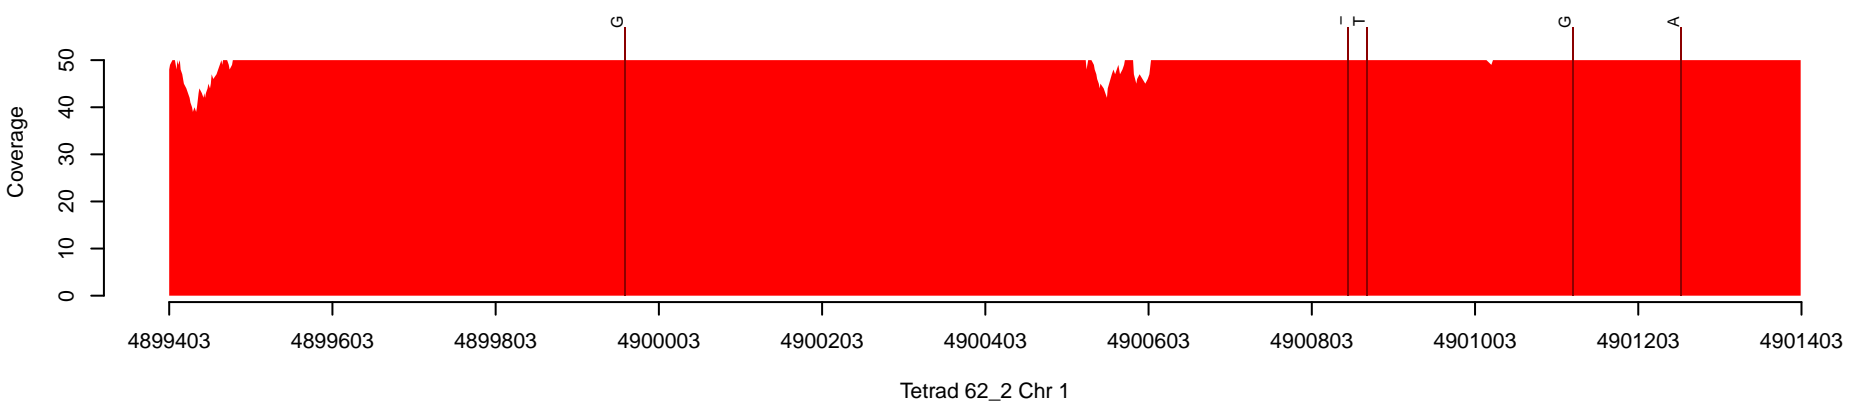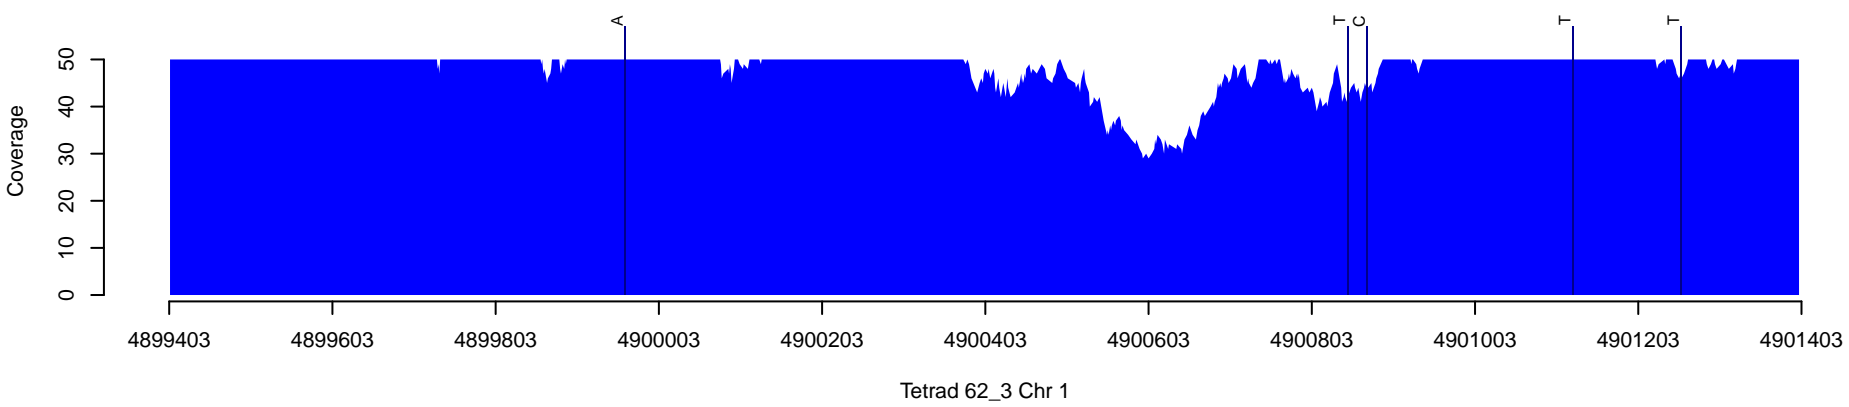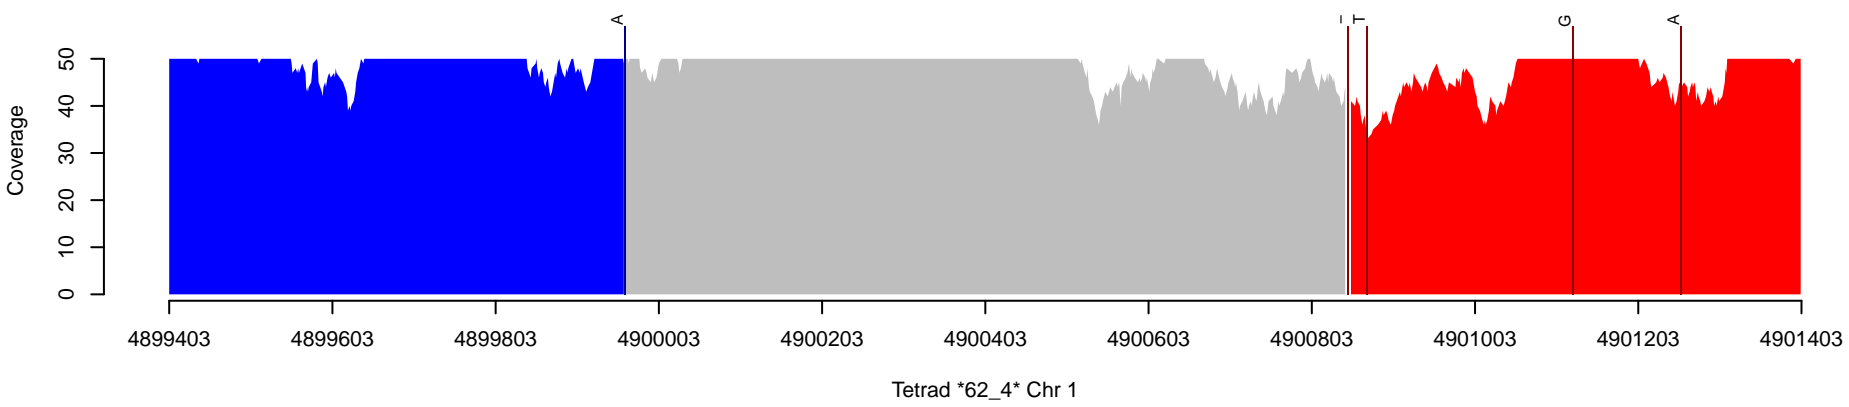

# ID44

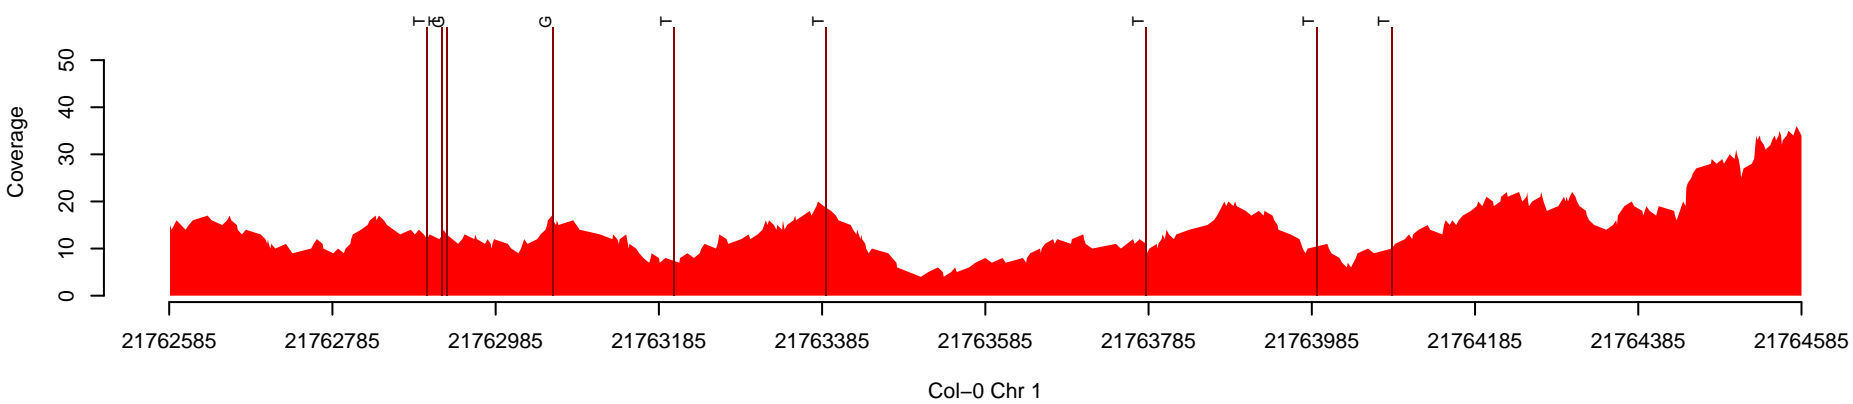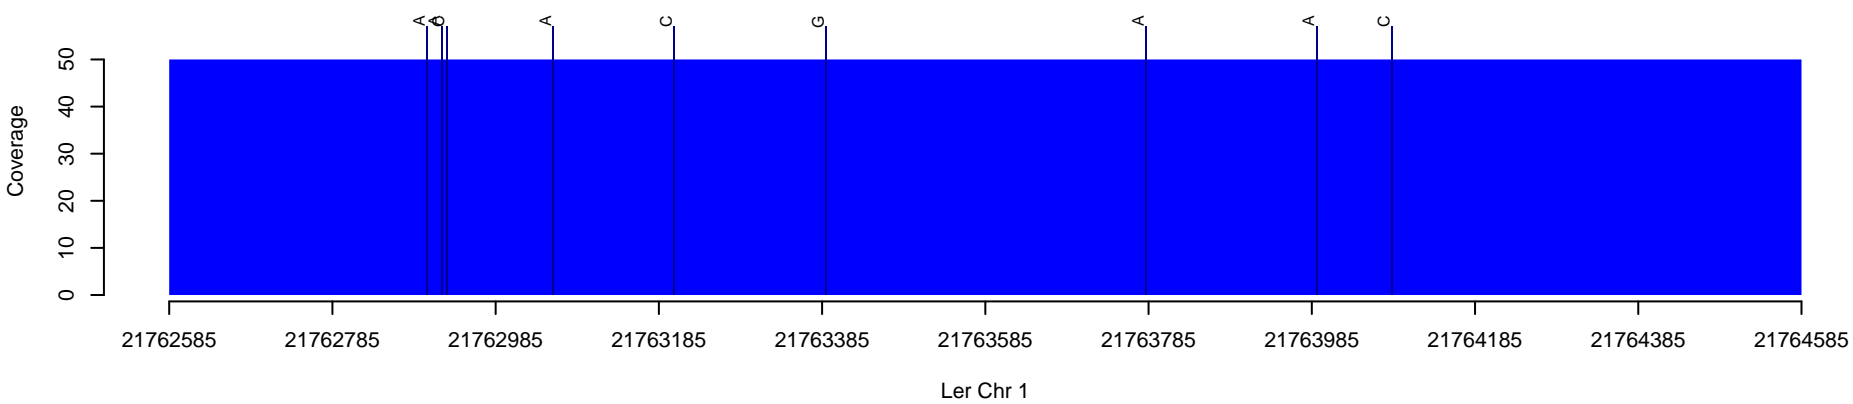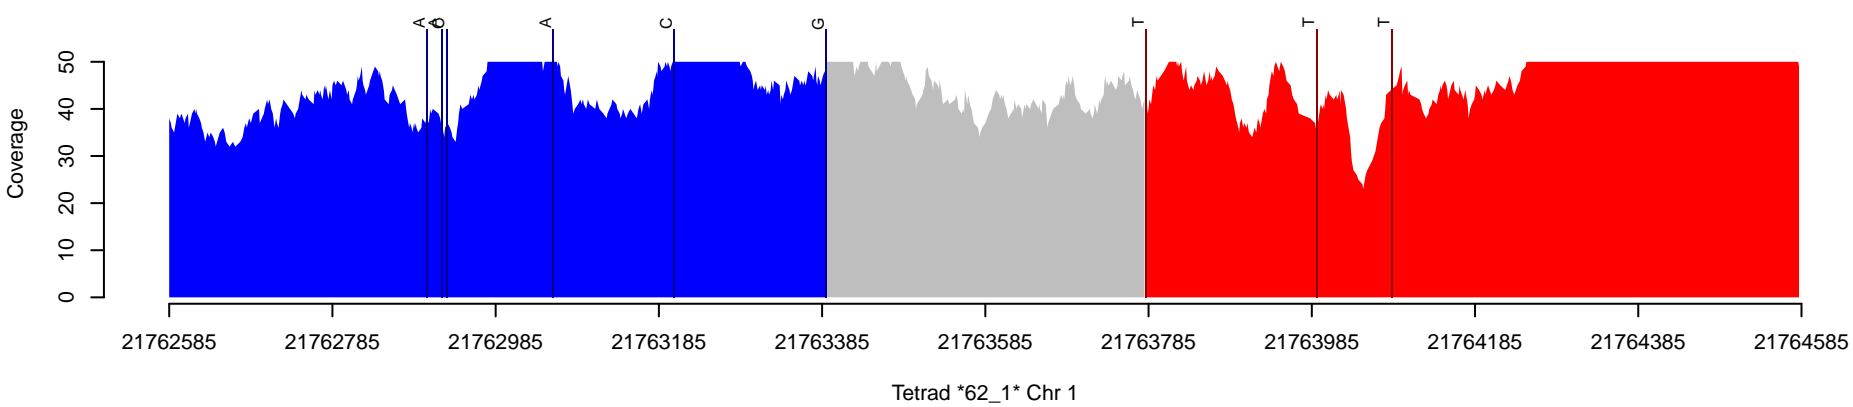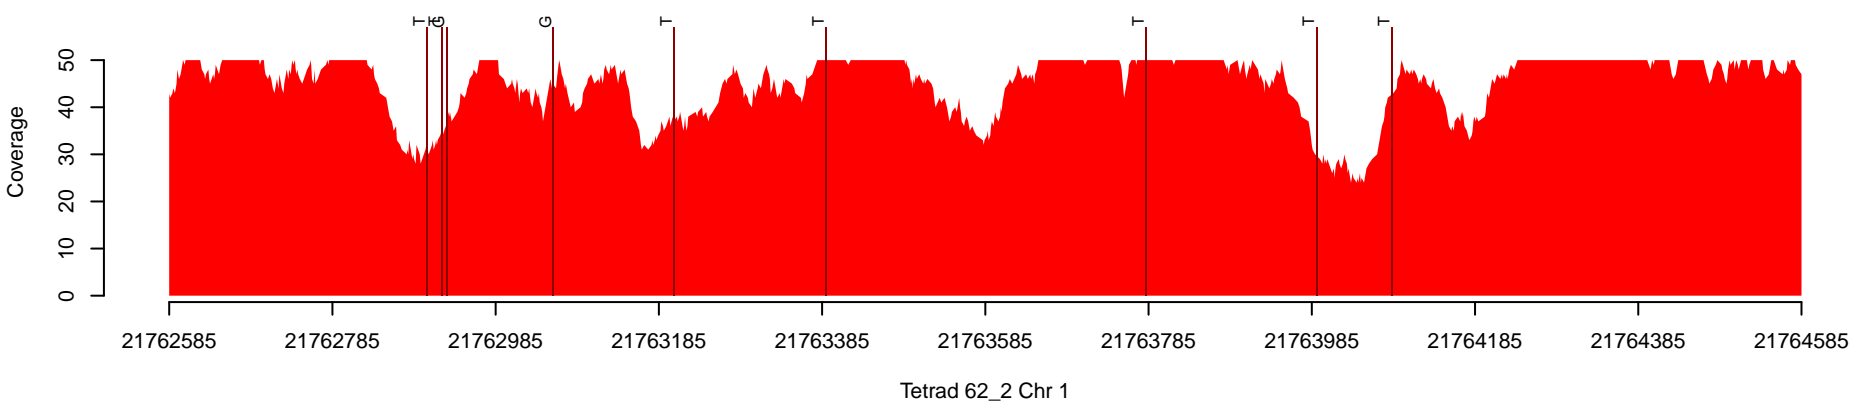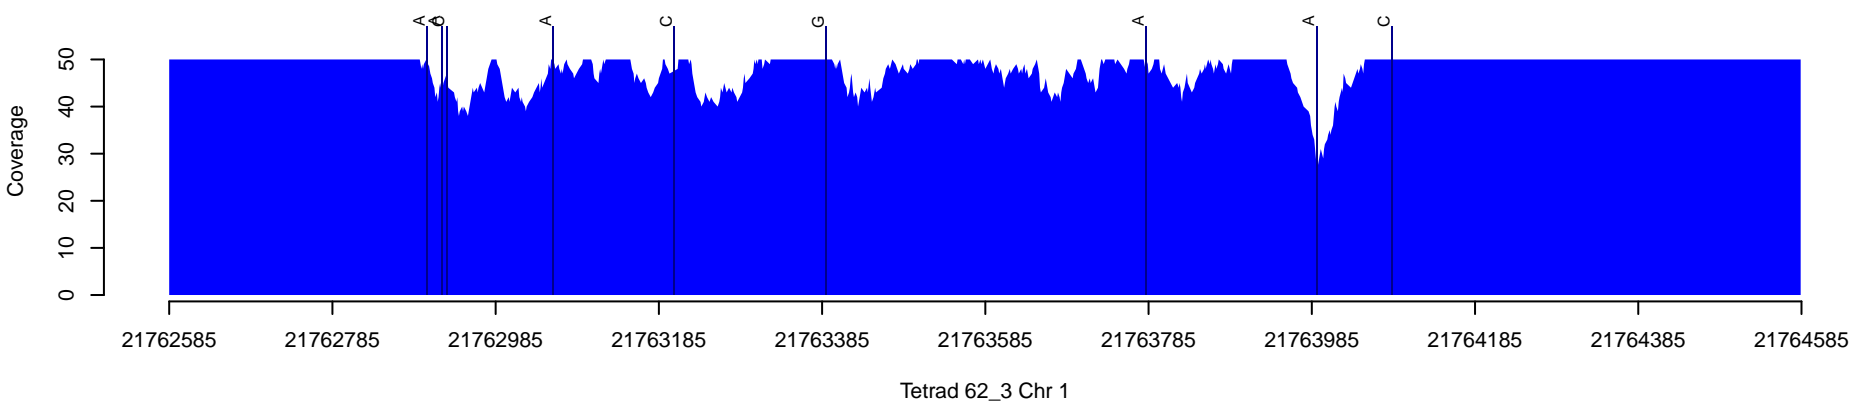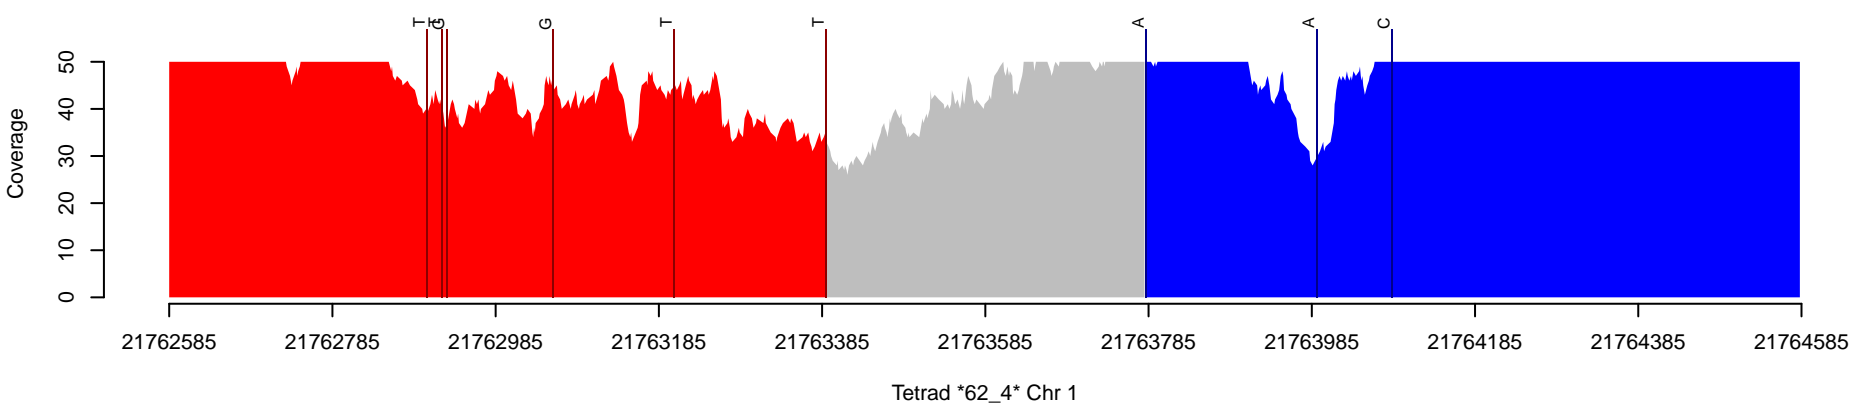

# ID45

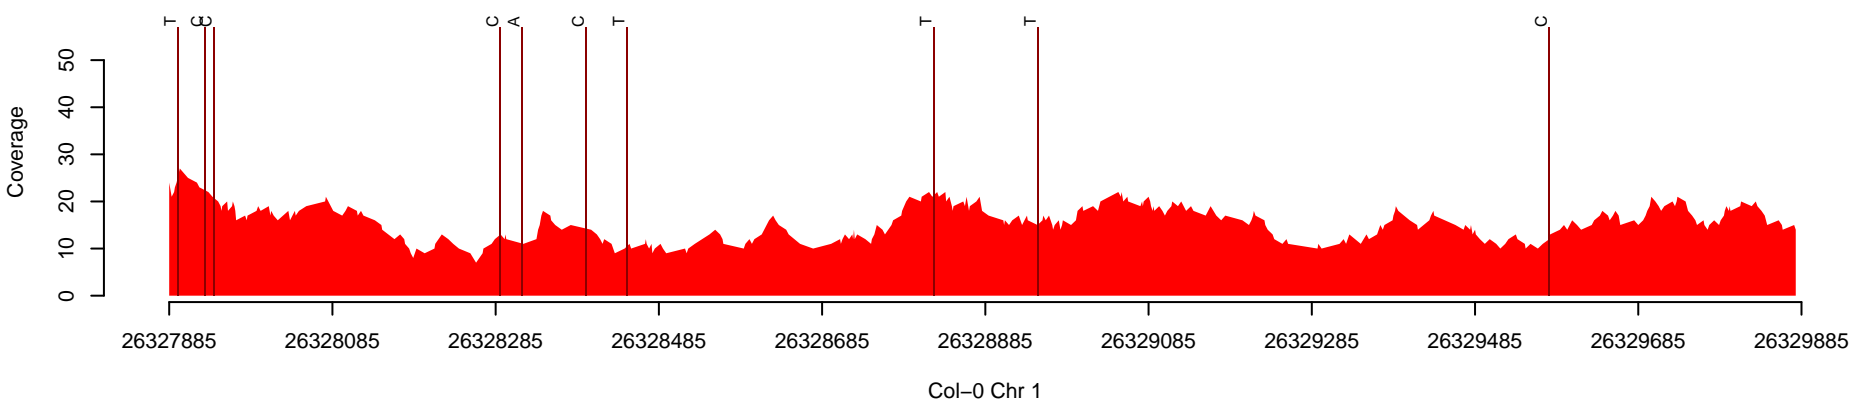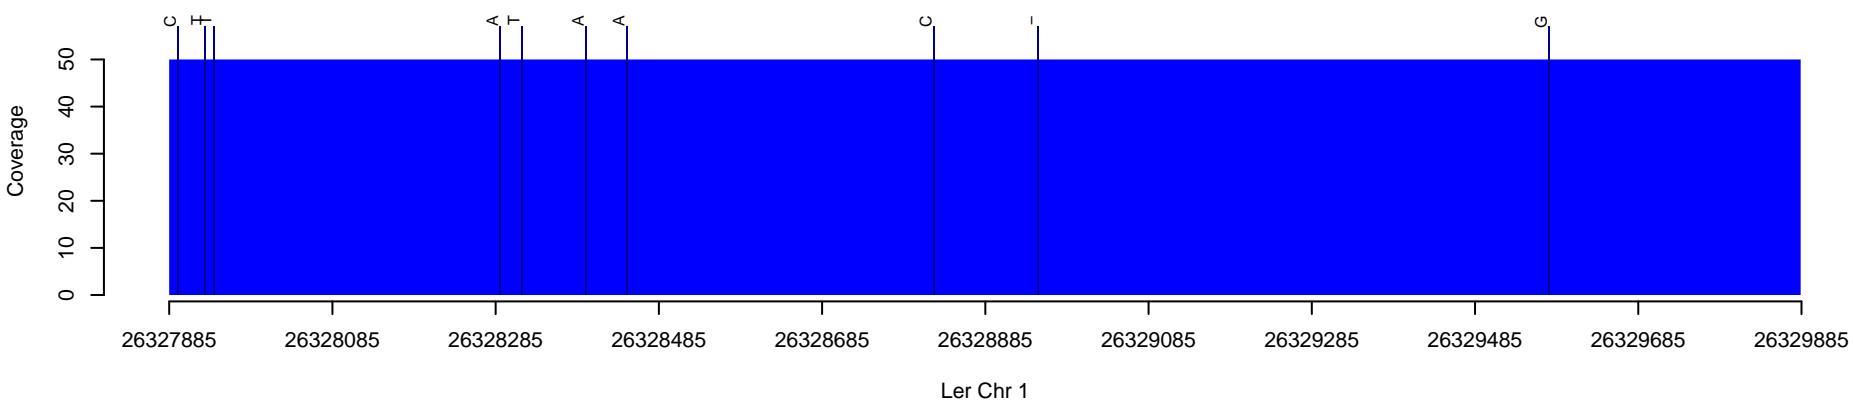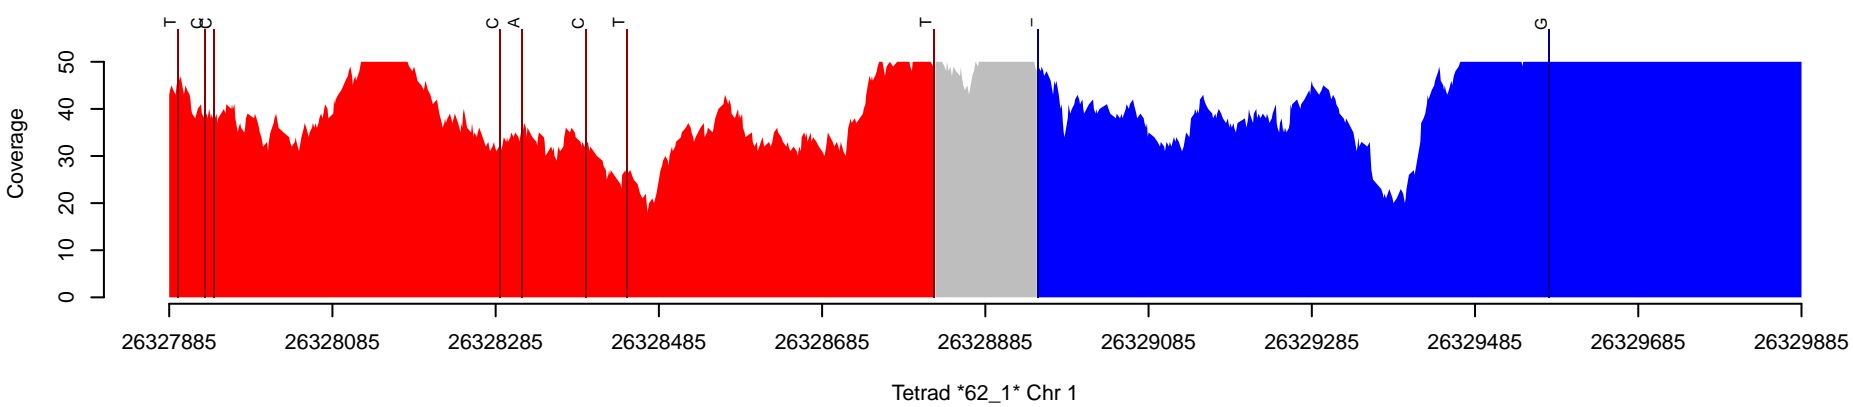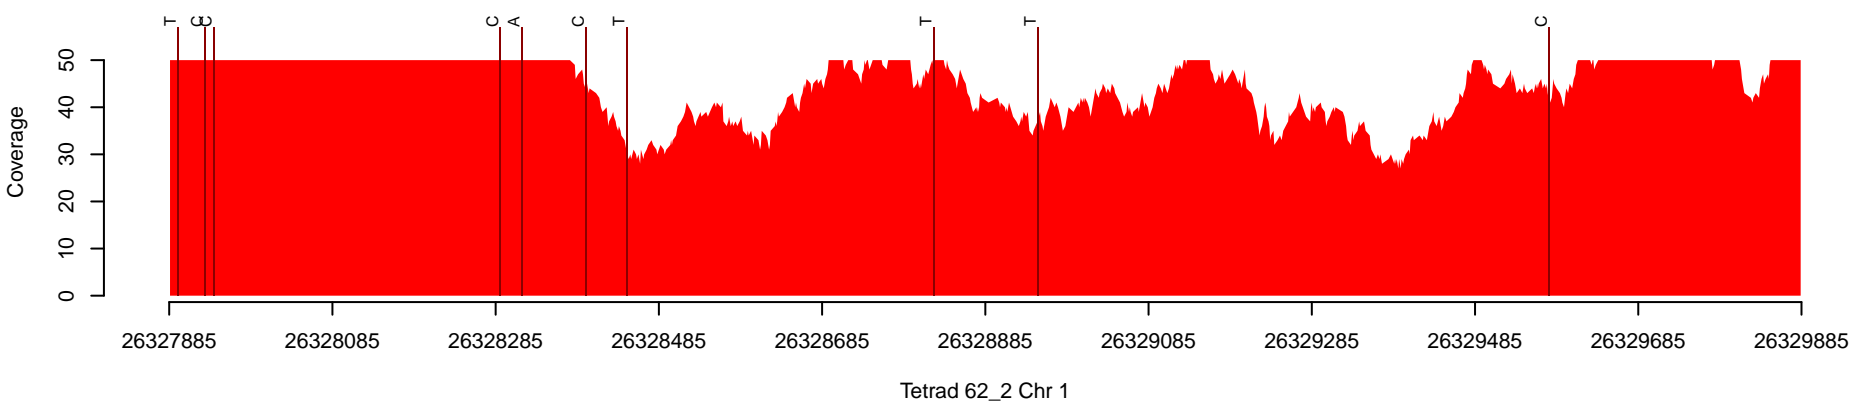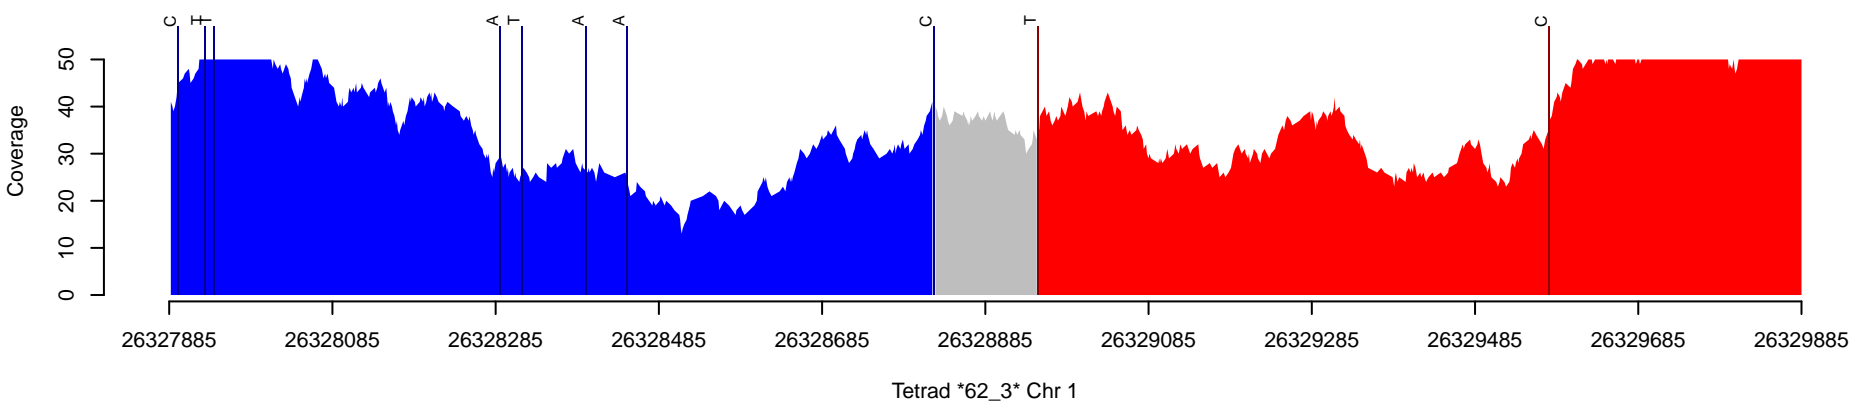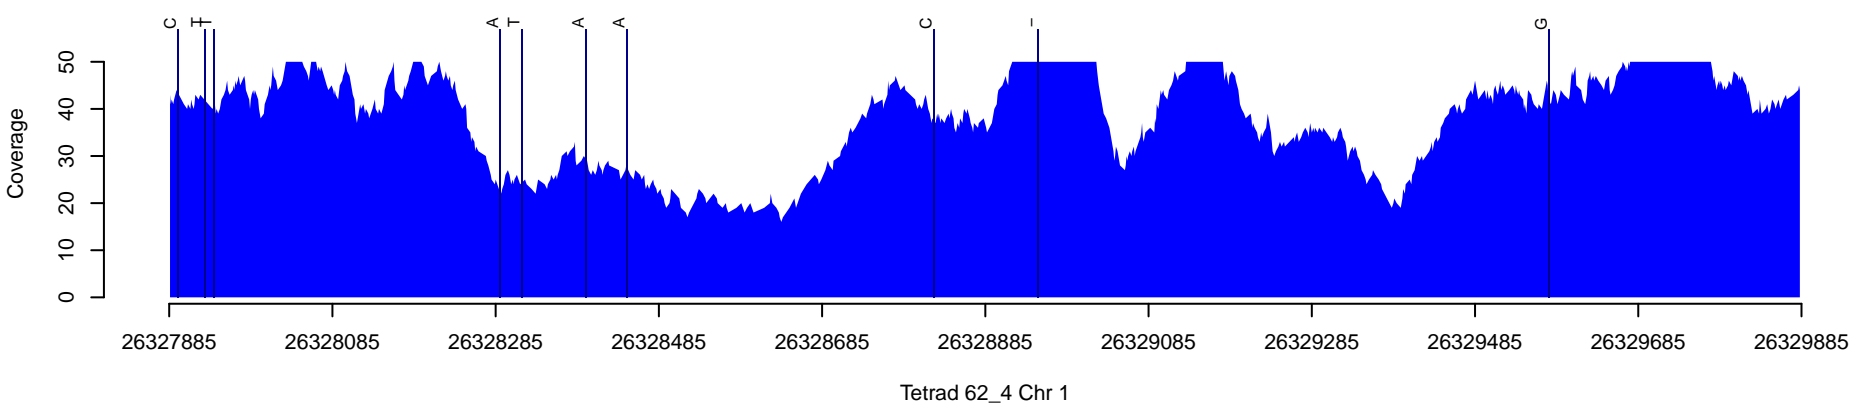

# ID46

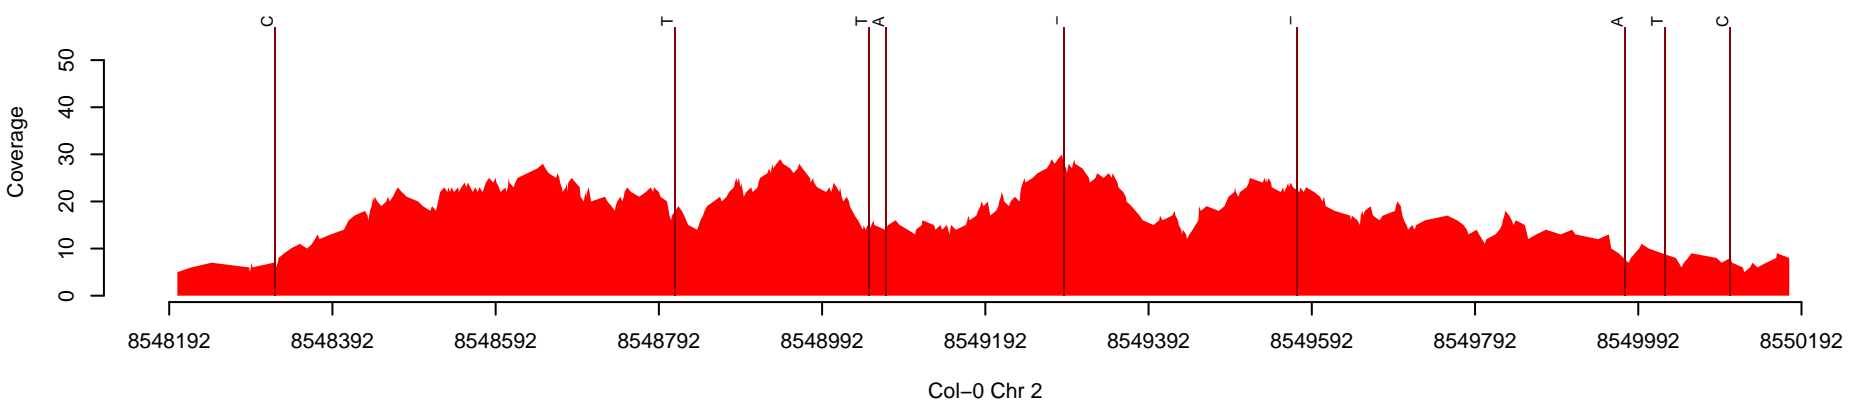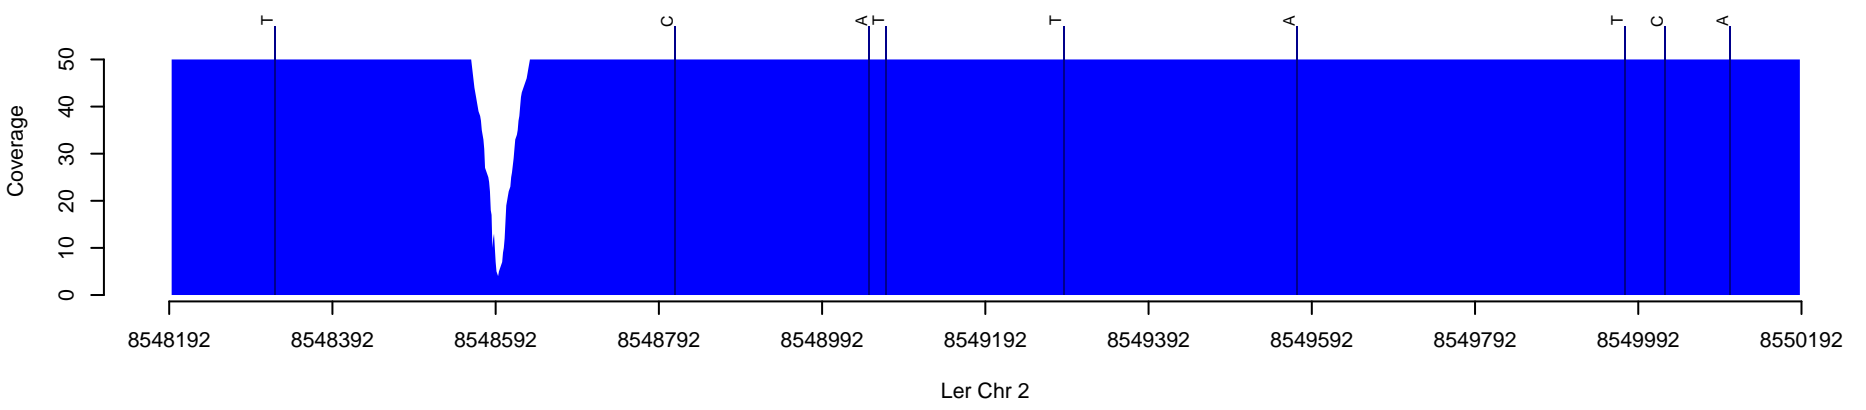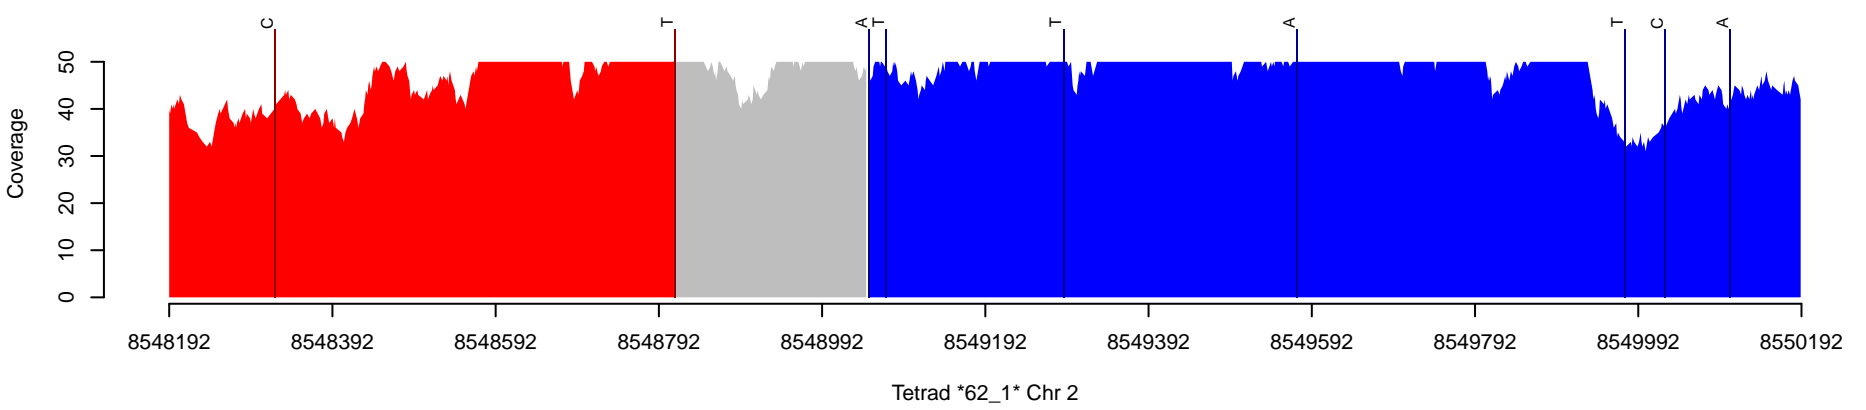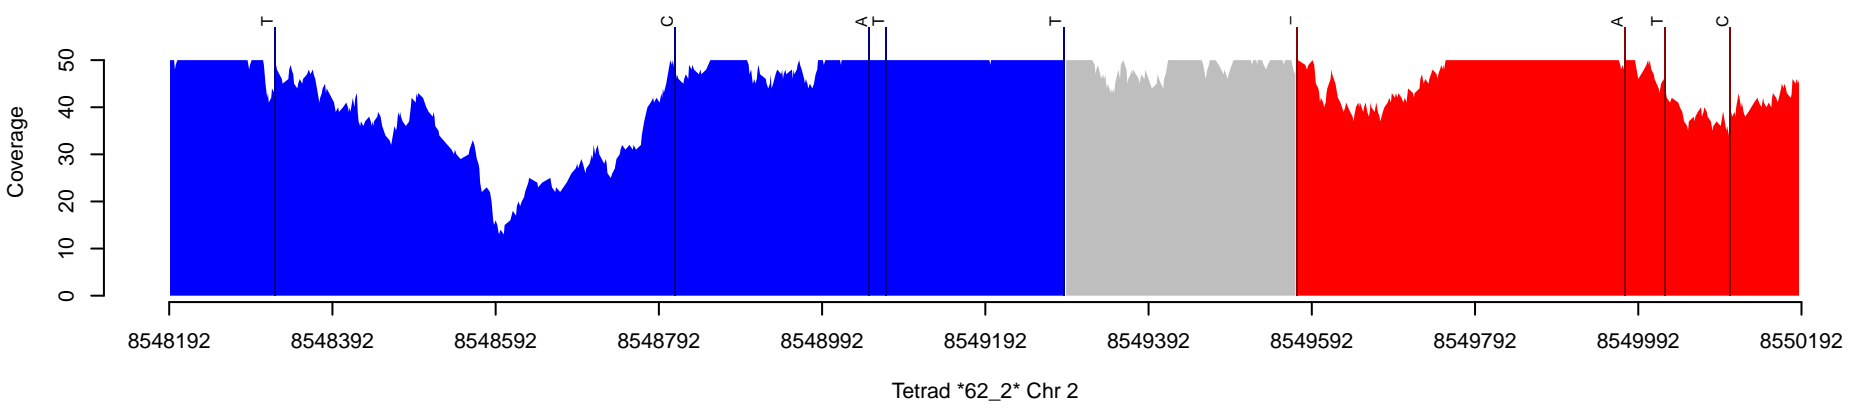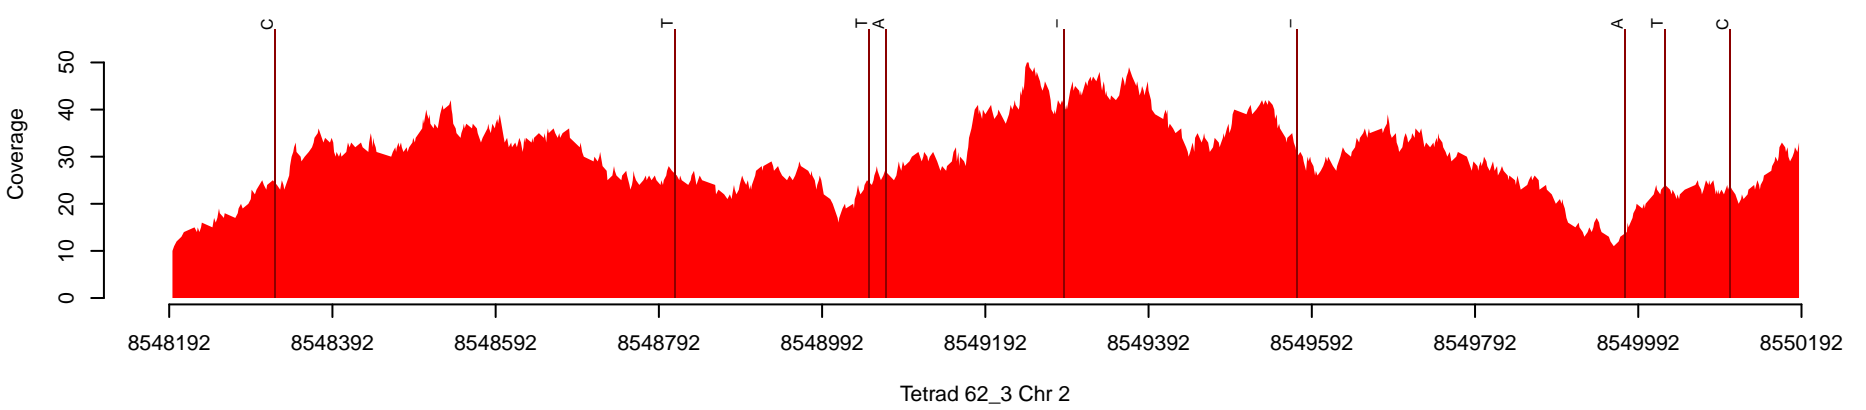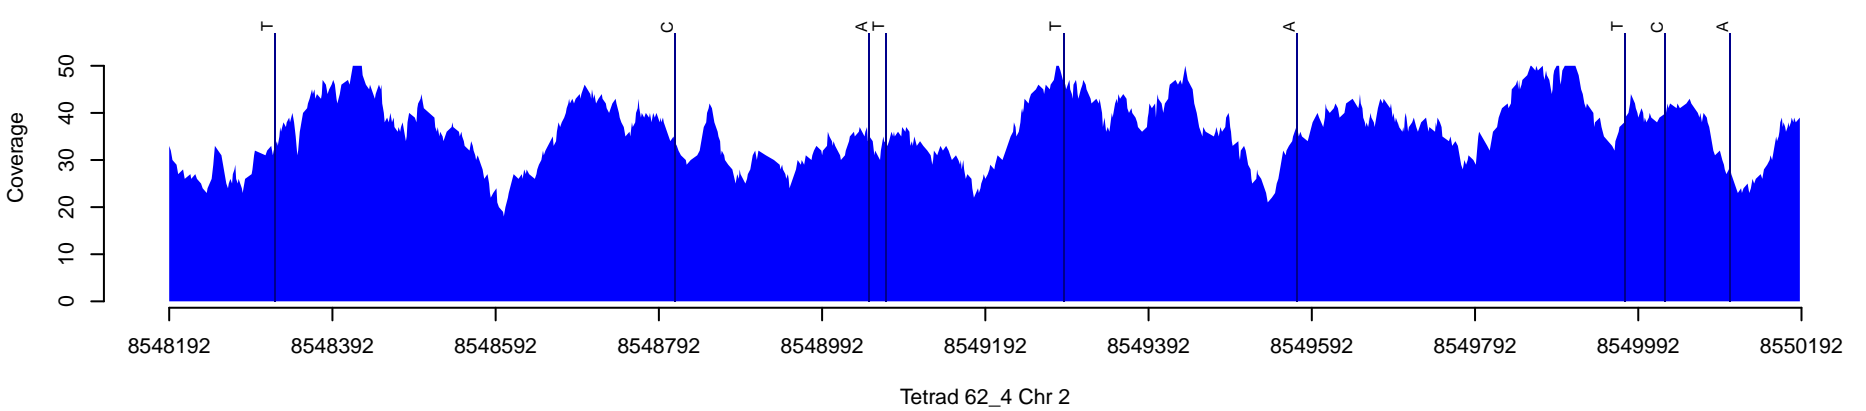

# ID47

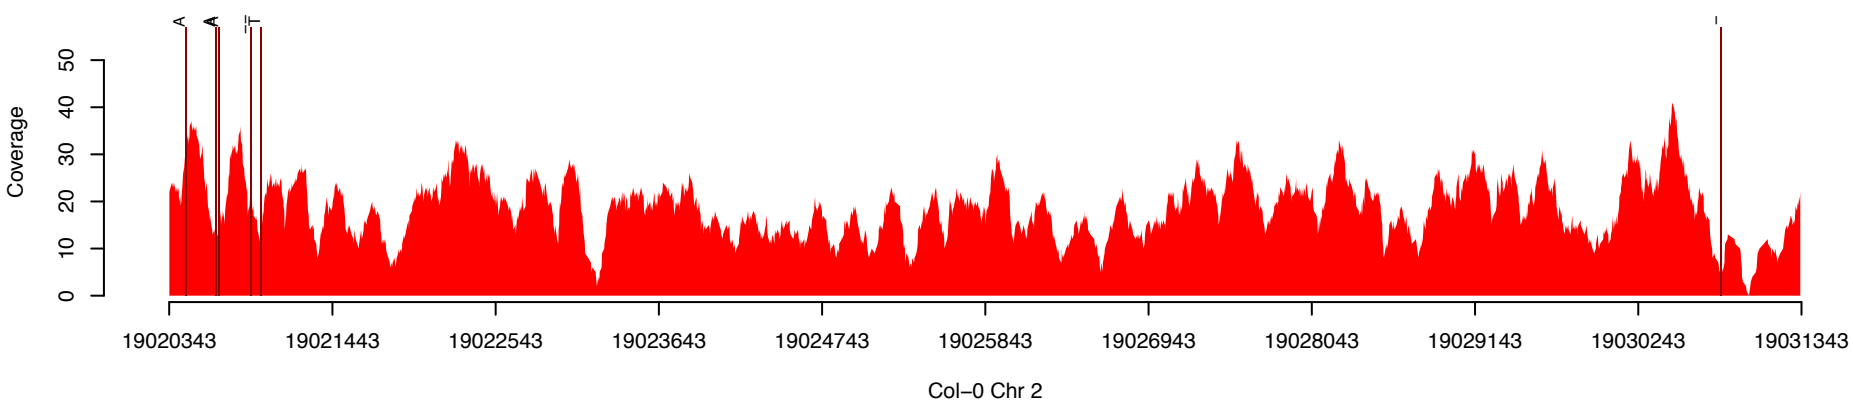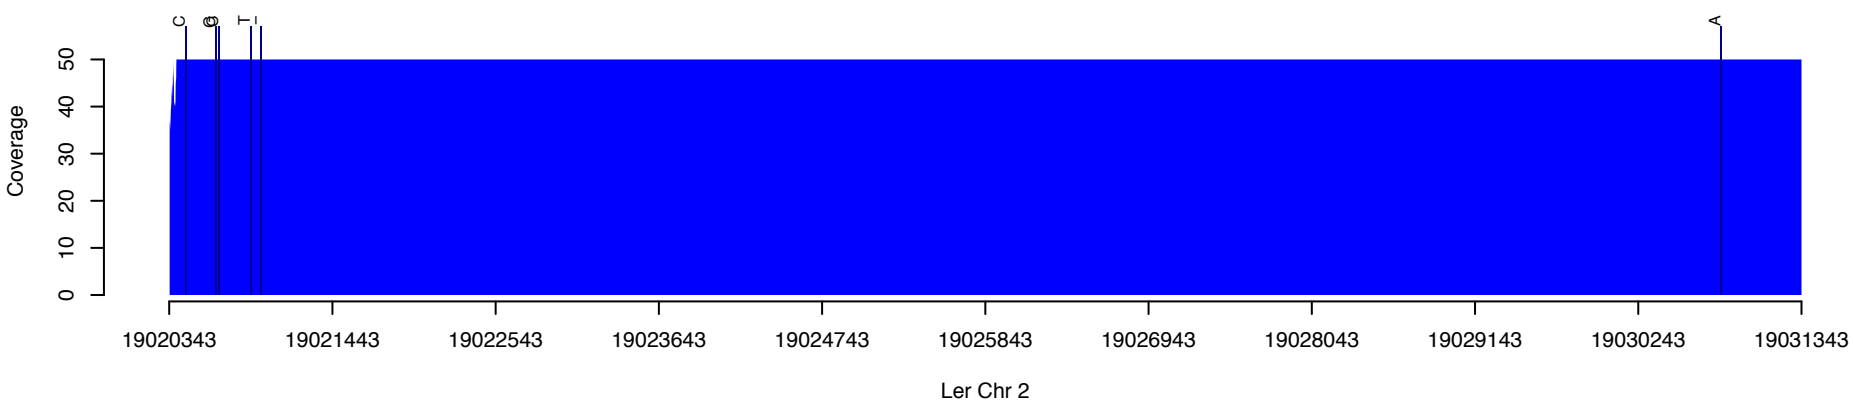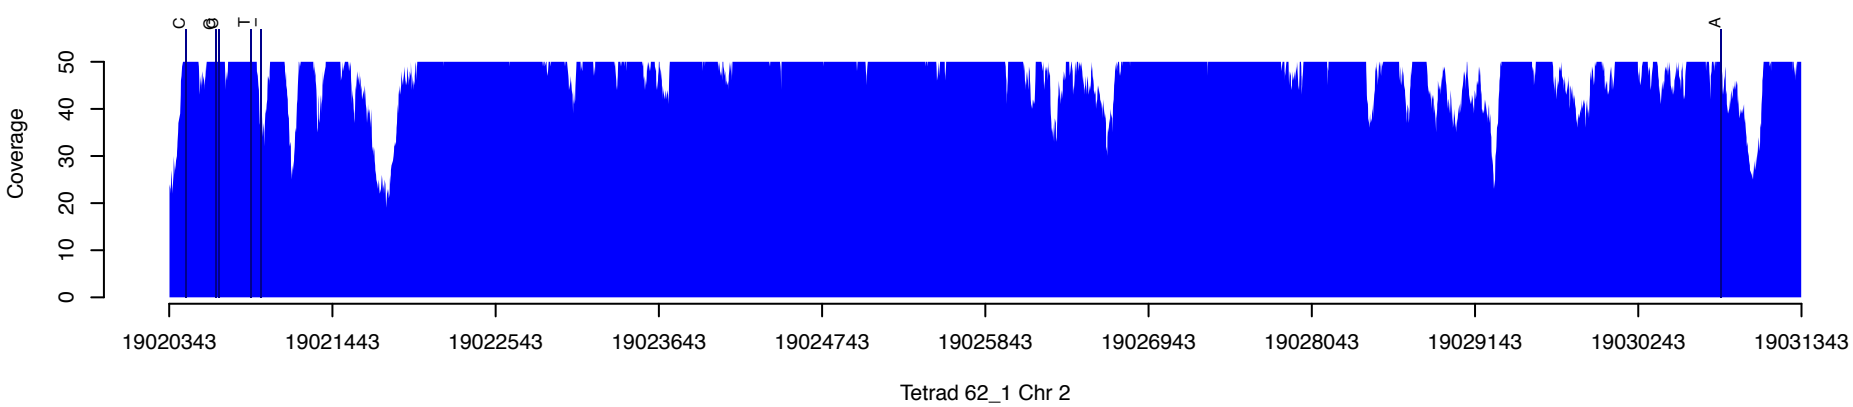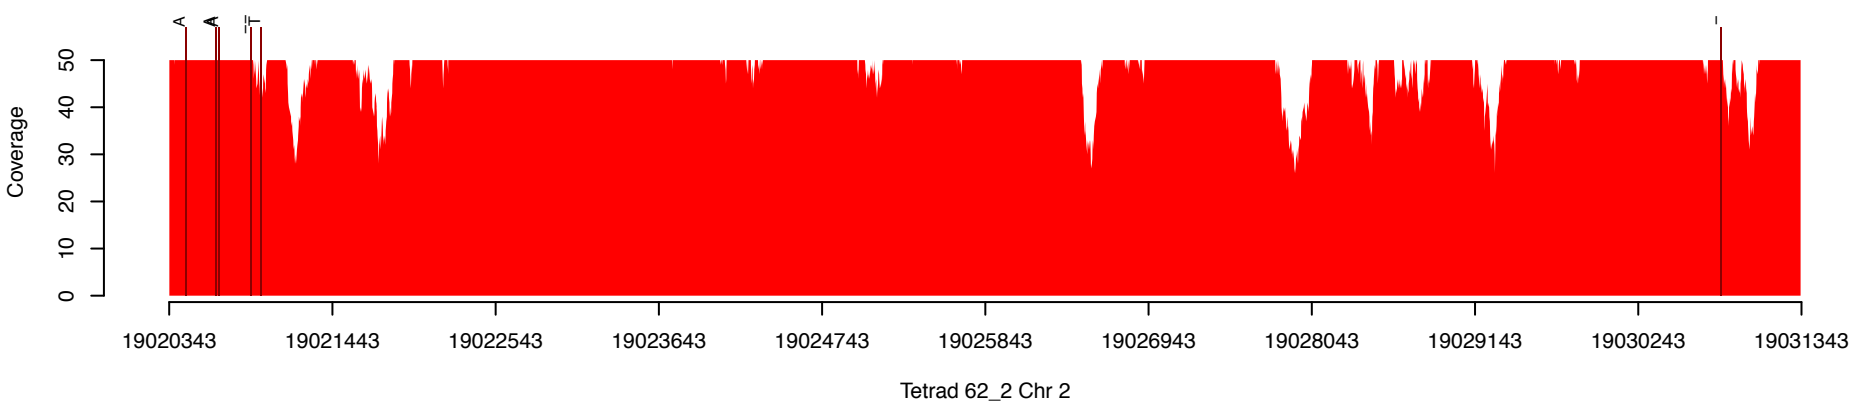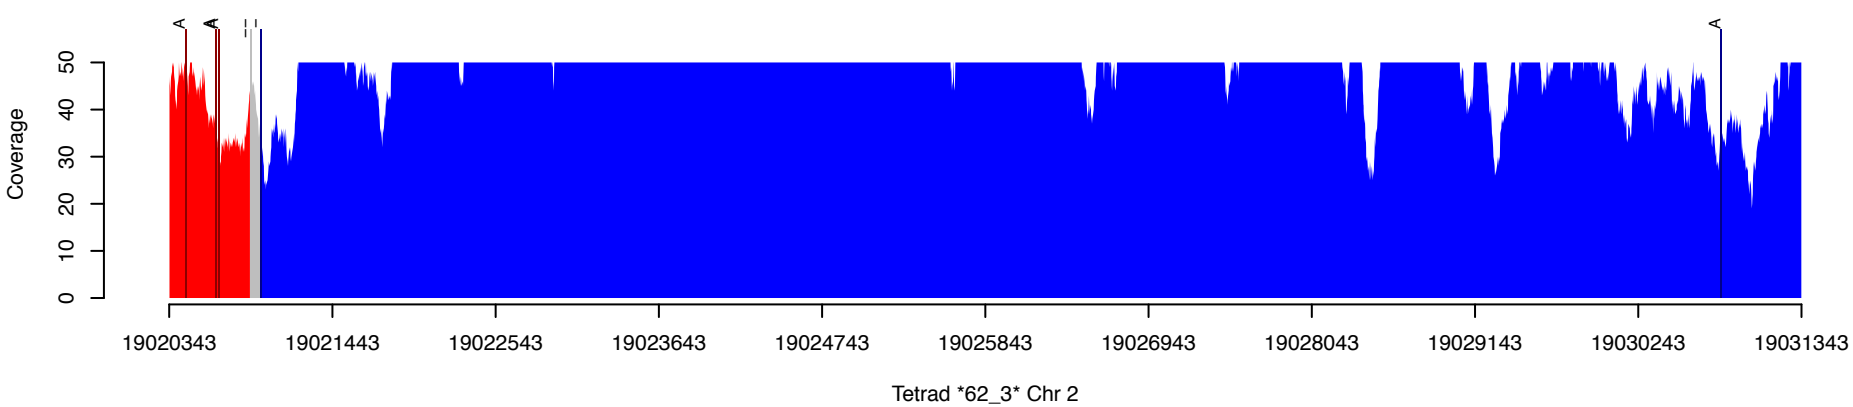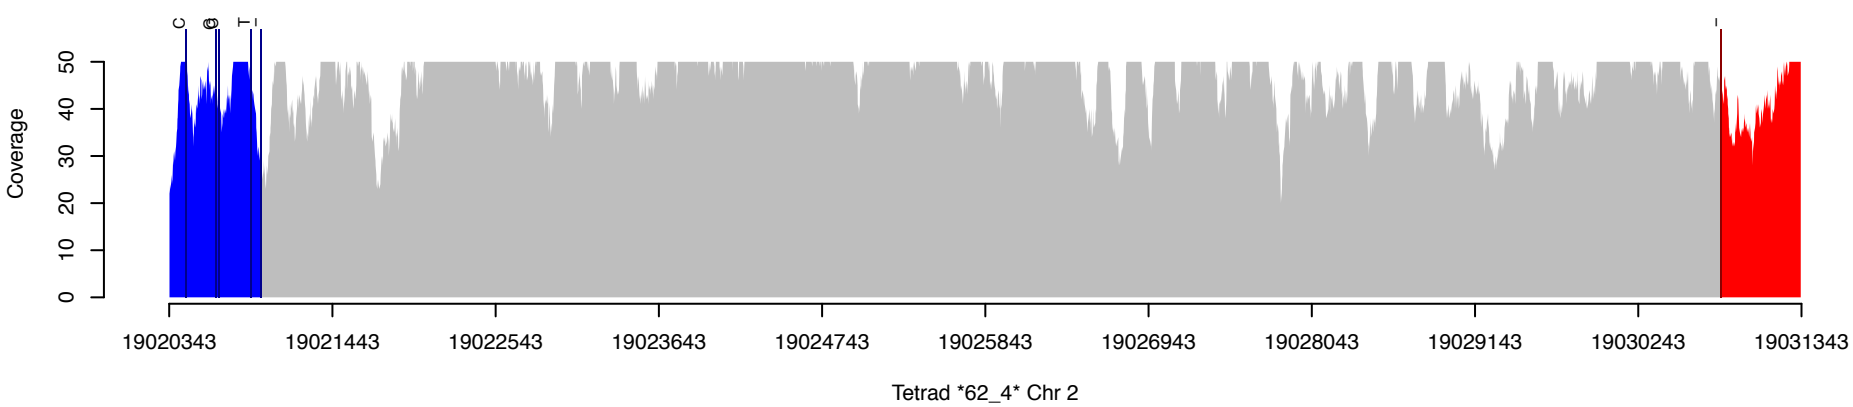

# ID48

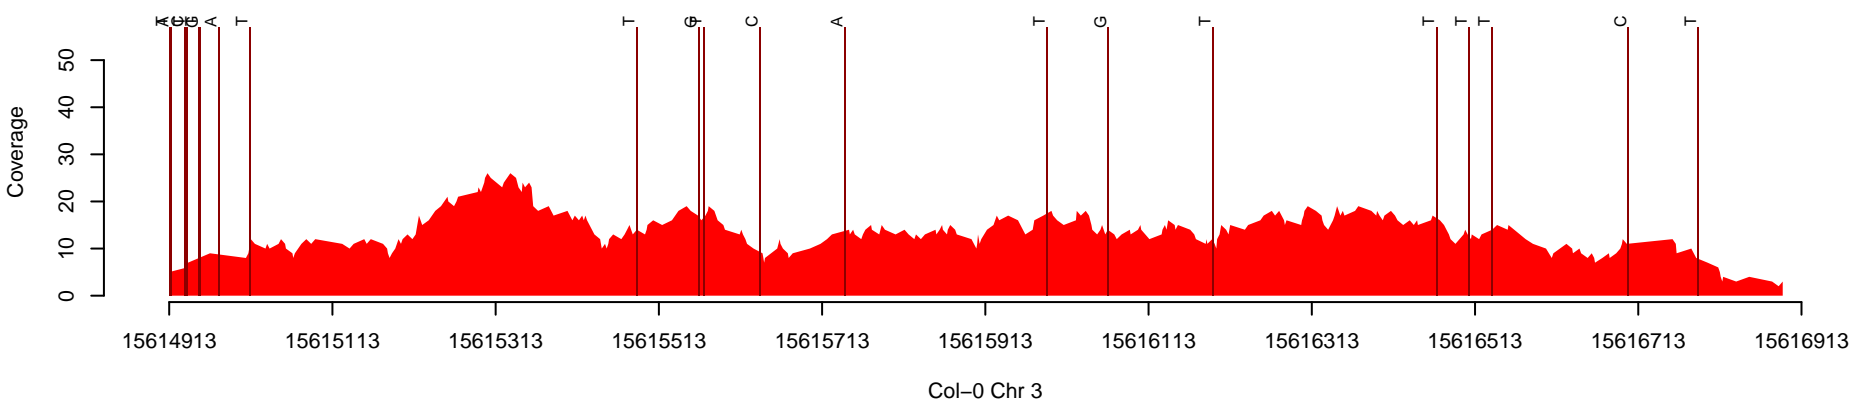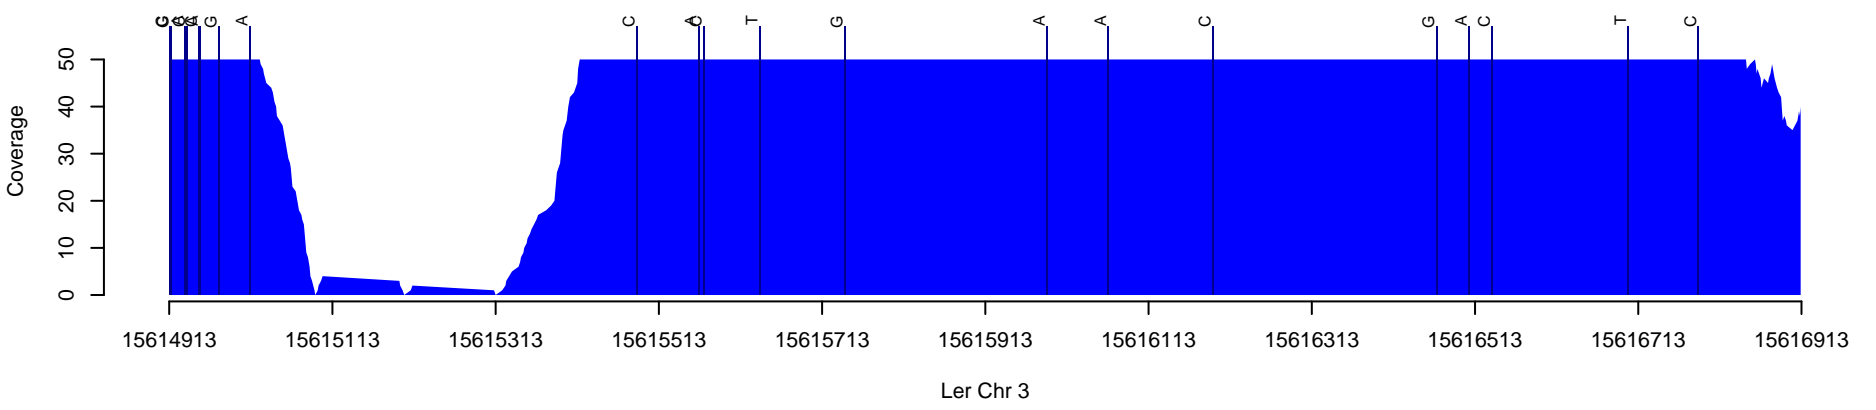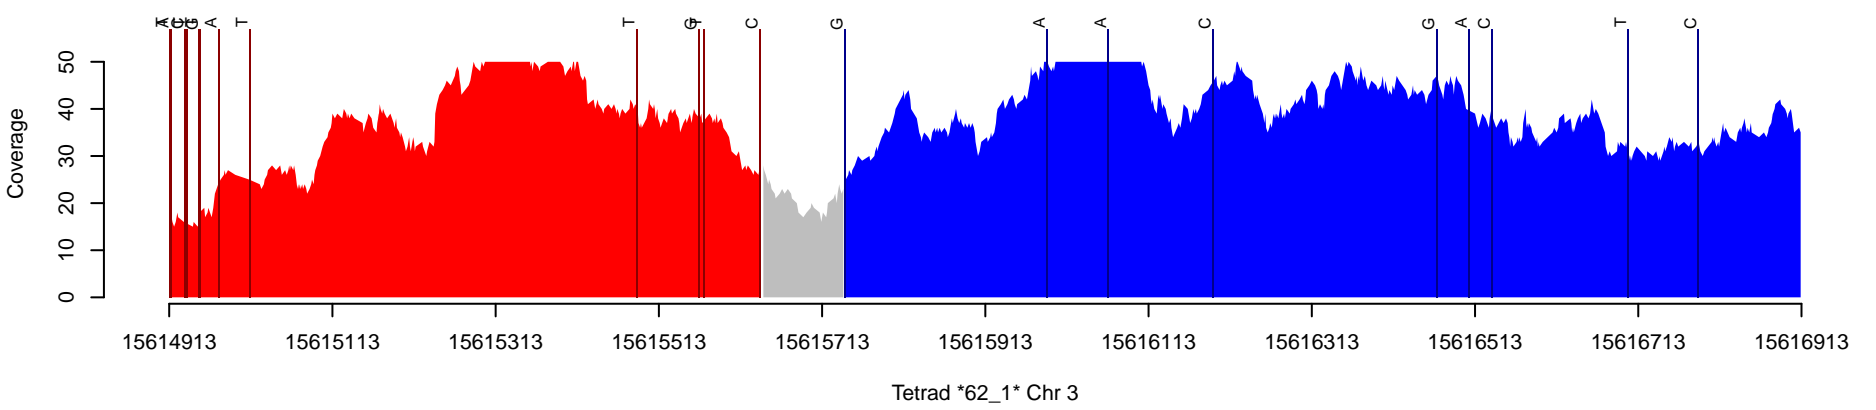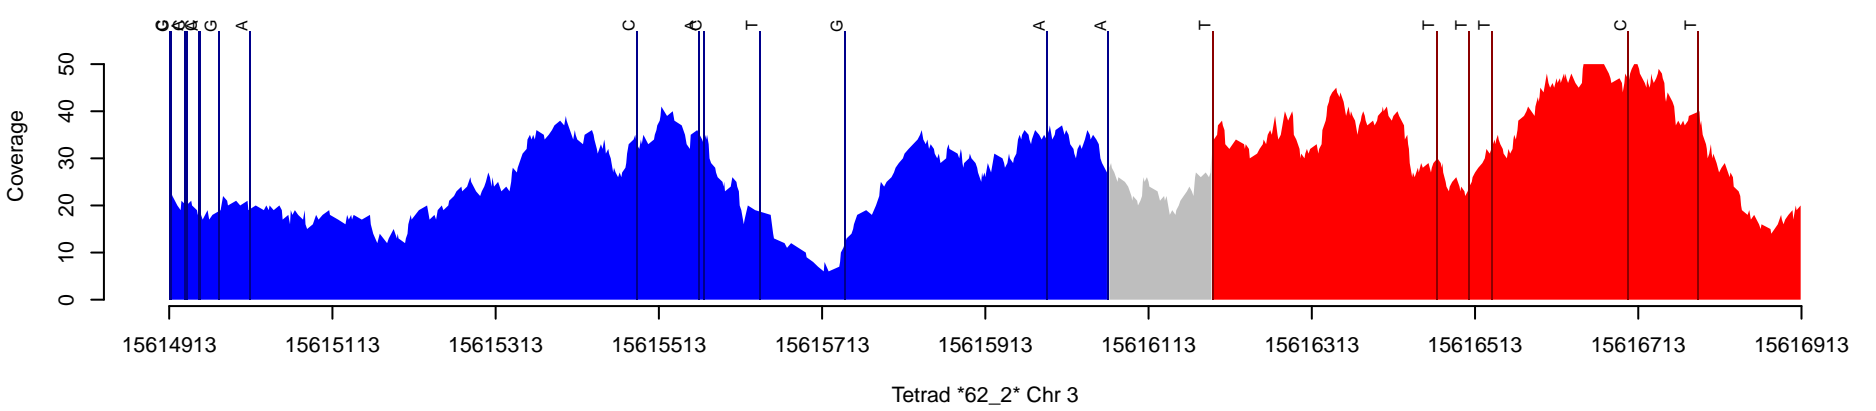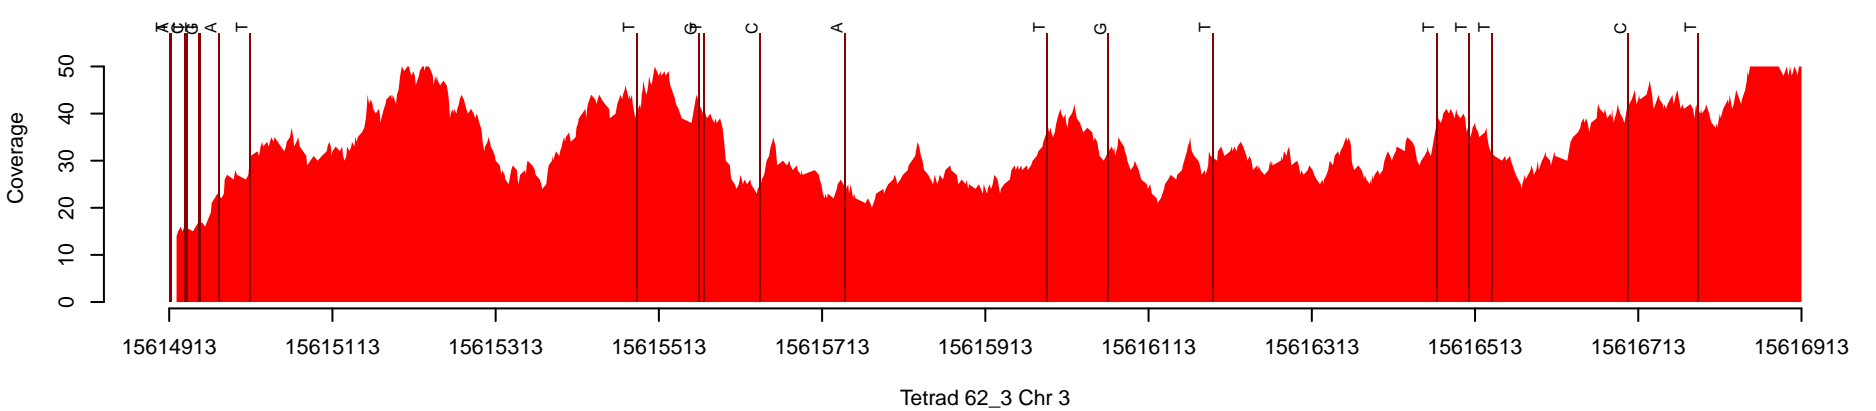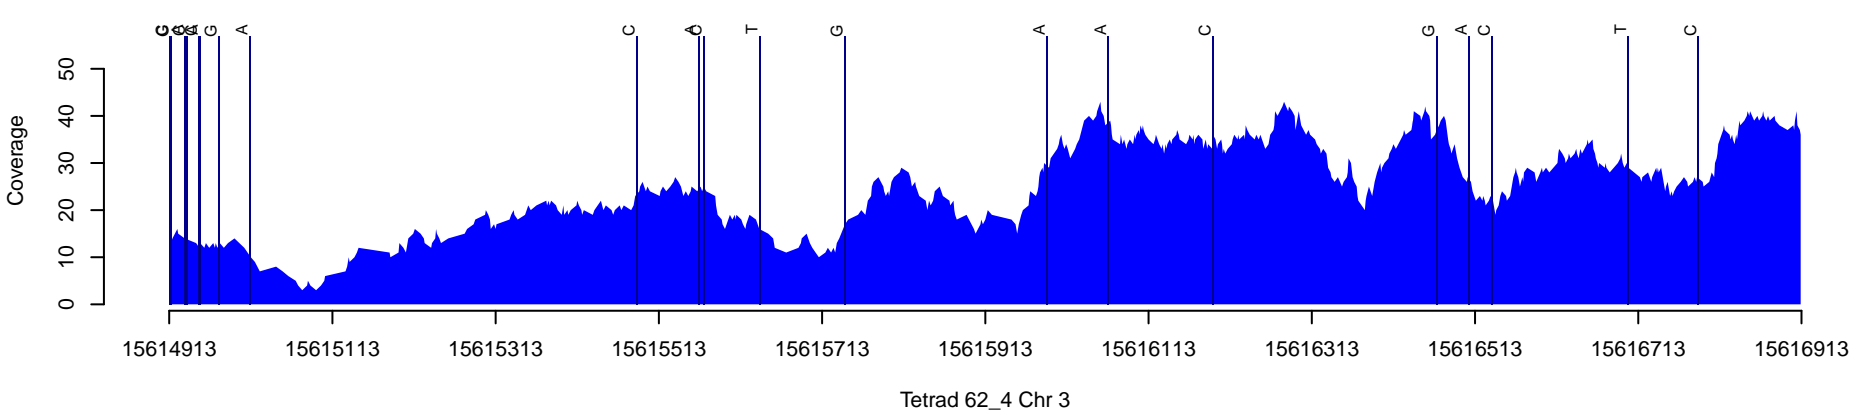



# ID49

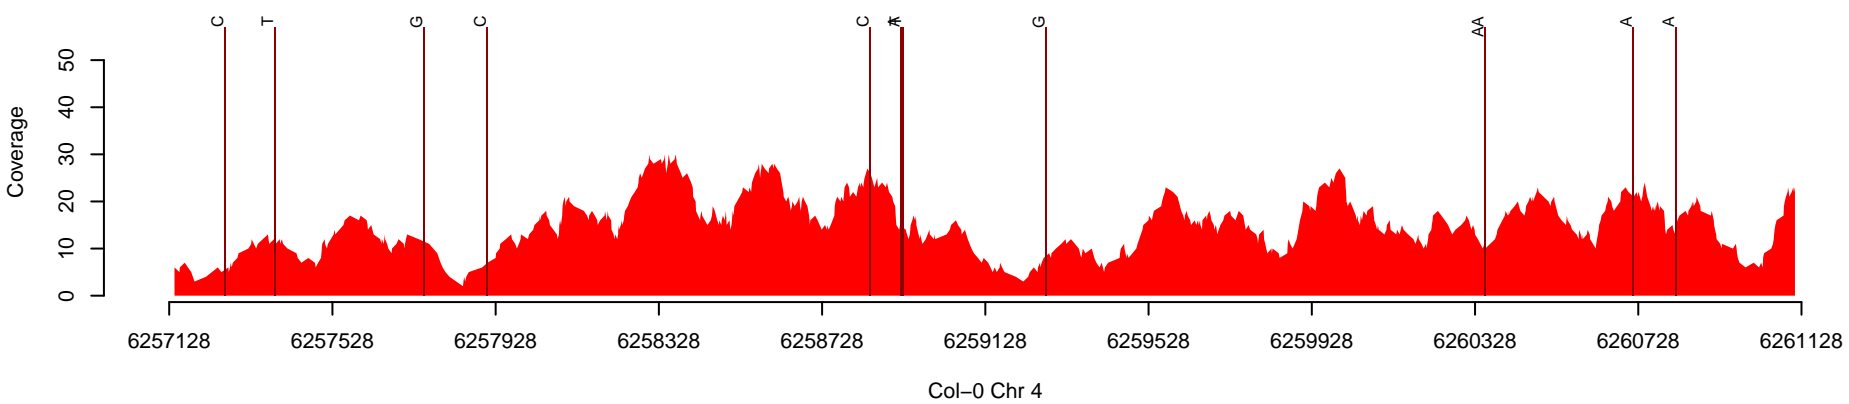

Col-0 Chr 4

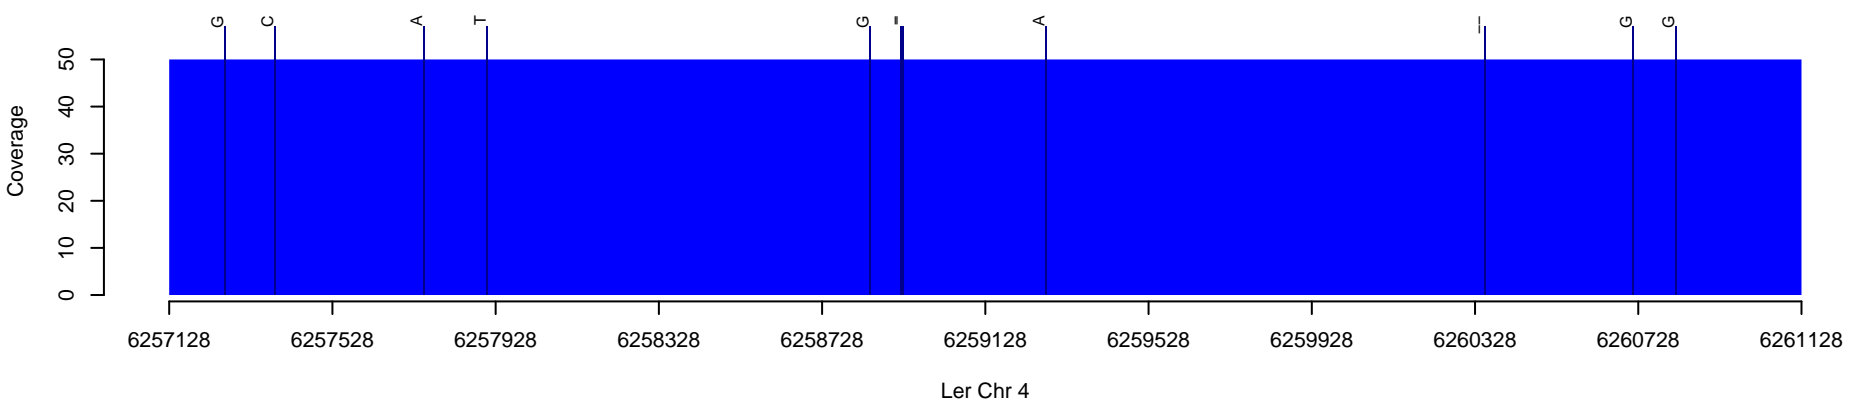

Ler Chr 4

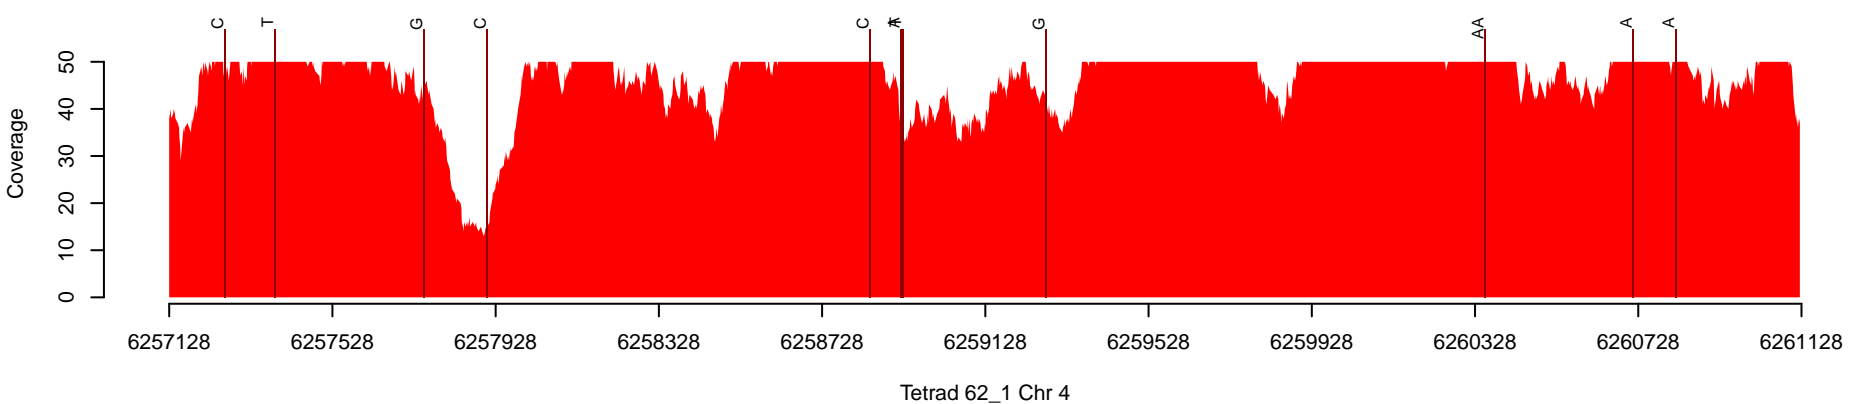

Tetrad 62\_1 Chr 4

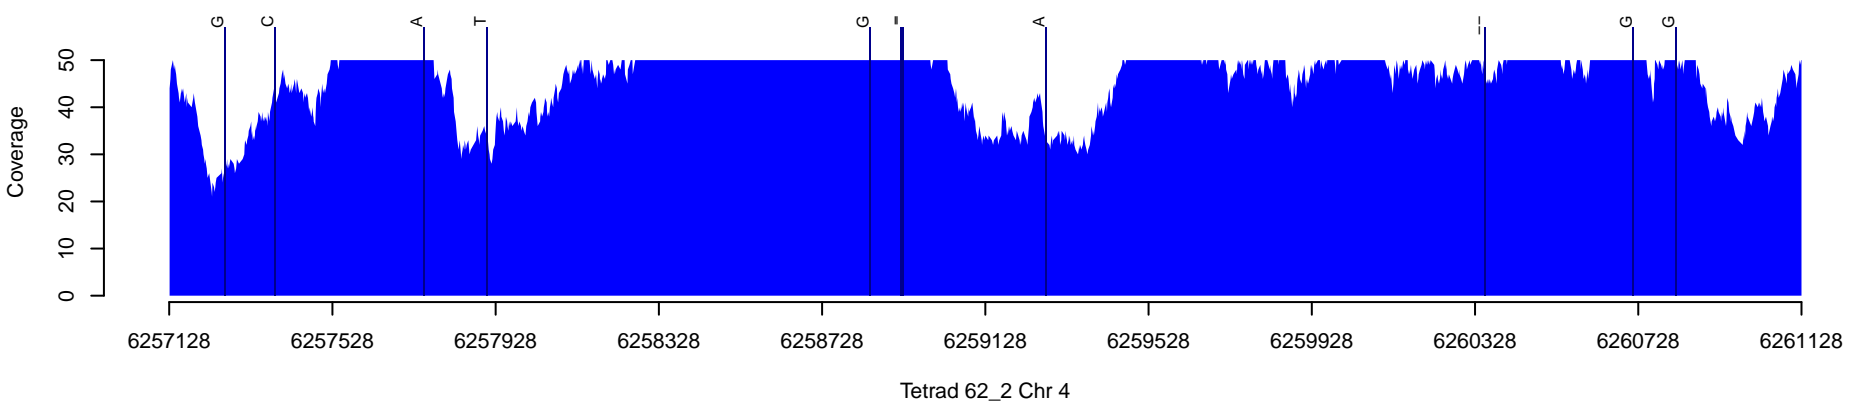

Tetrad 62\_2 Chr 4

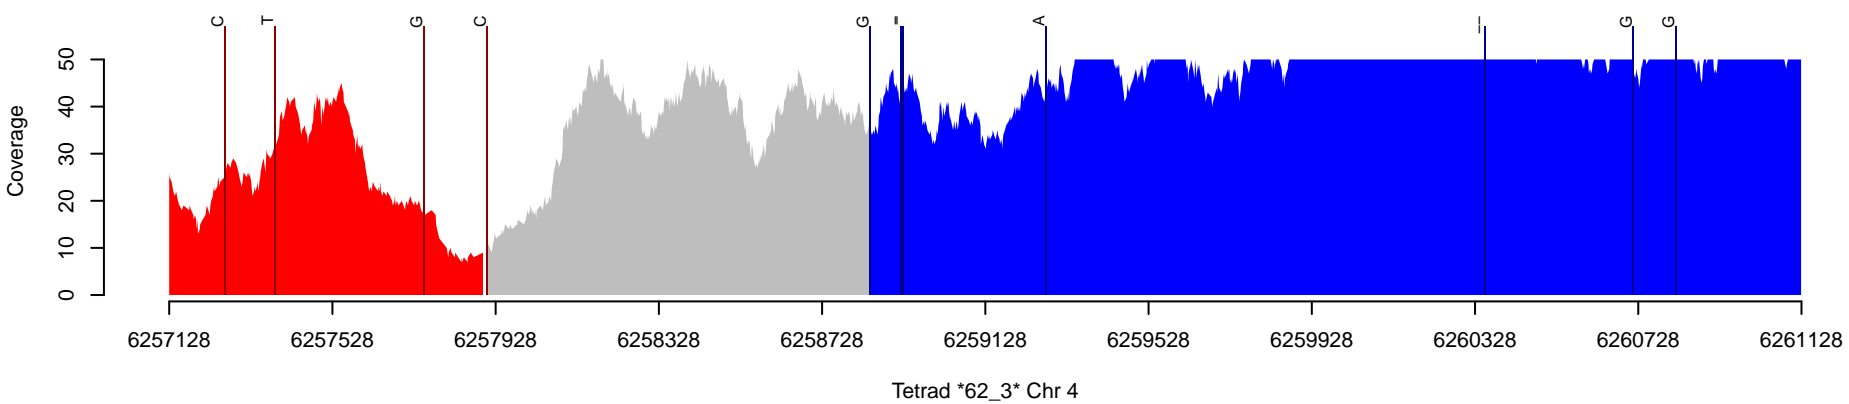

Tetrad \*62\_3\* Chr 4

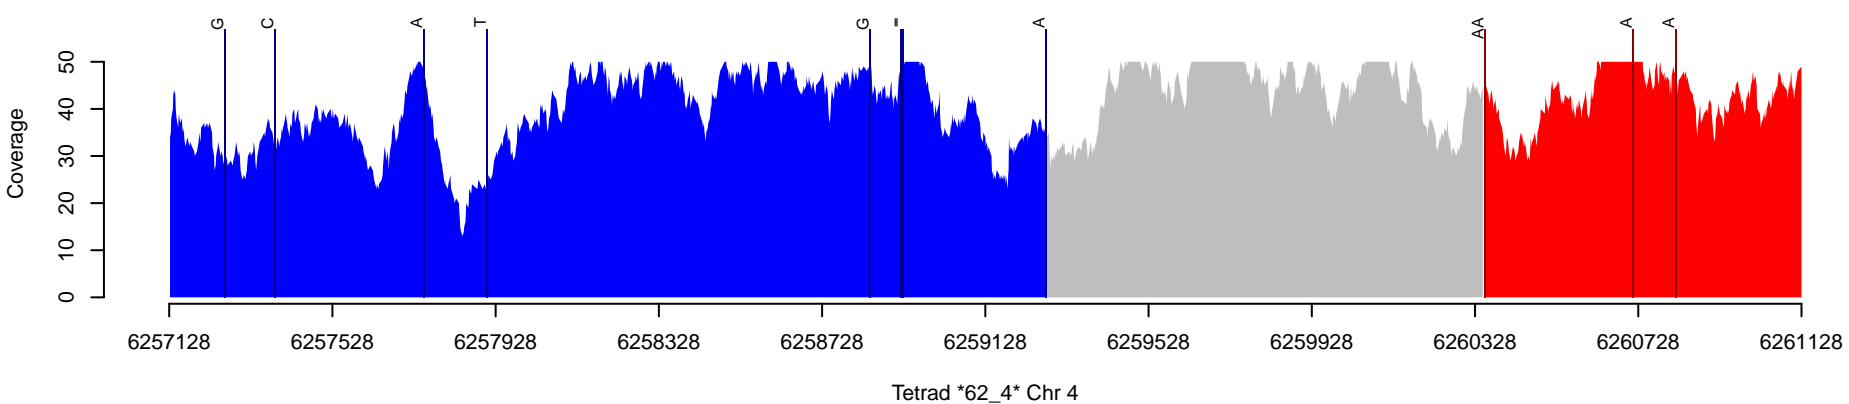

Tetrad \*62\_4\* Chr 4

# ID50

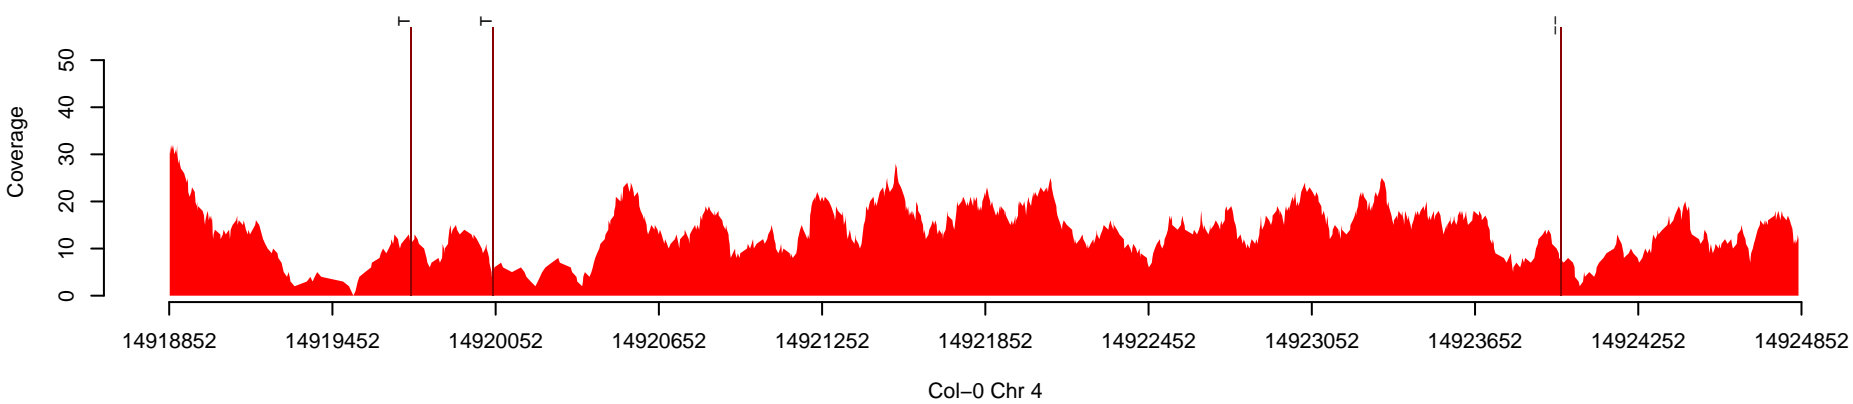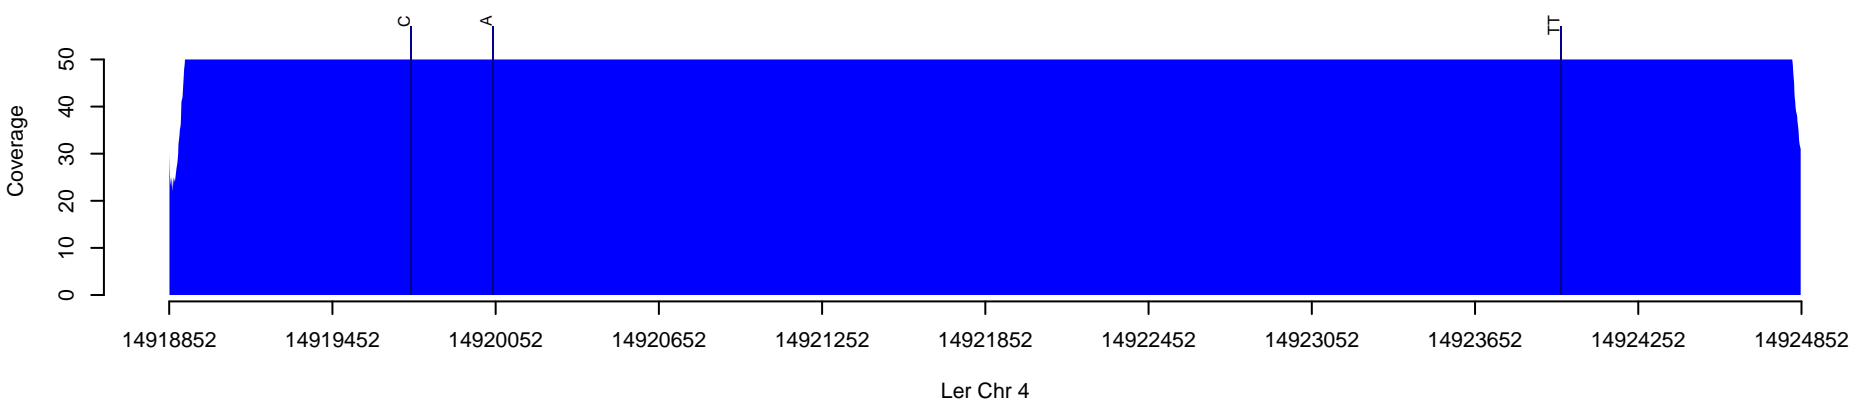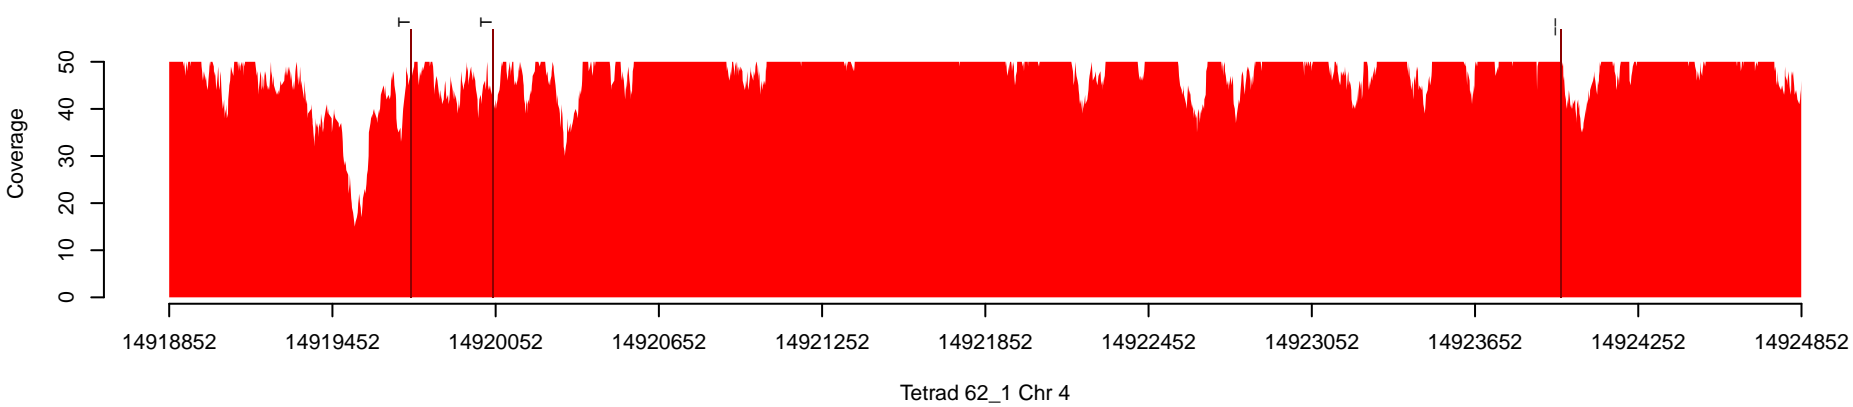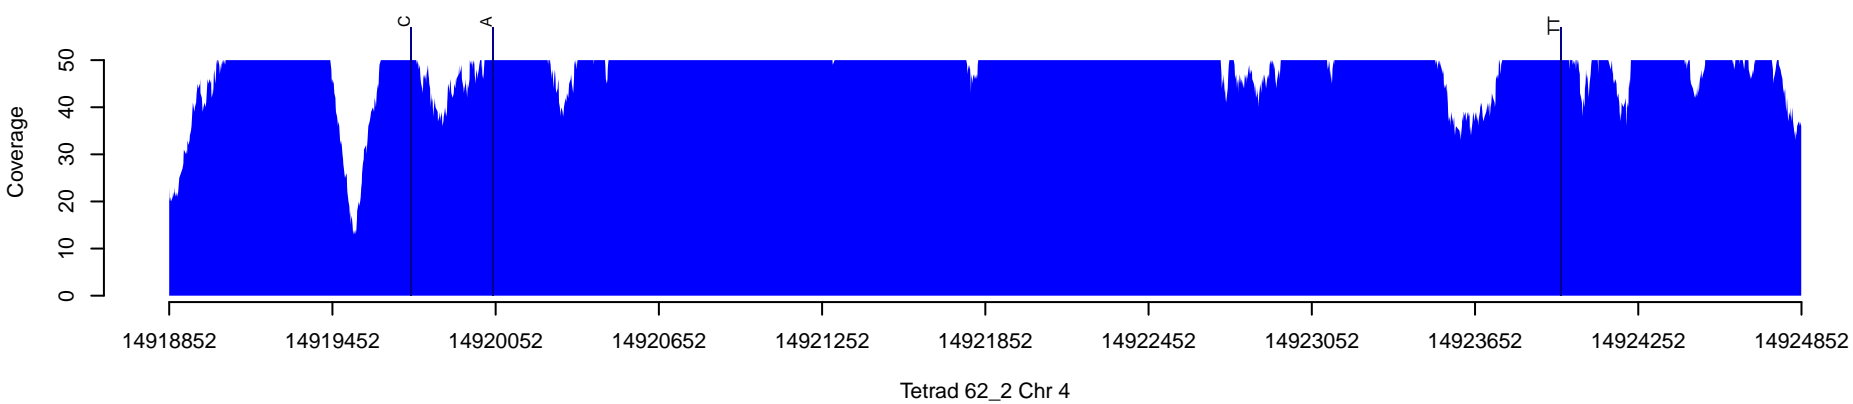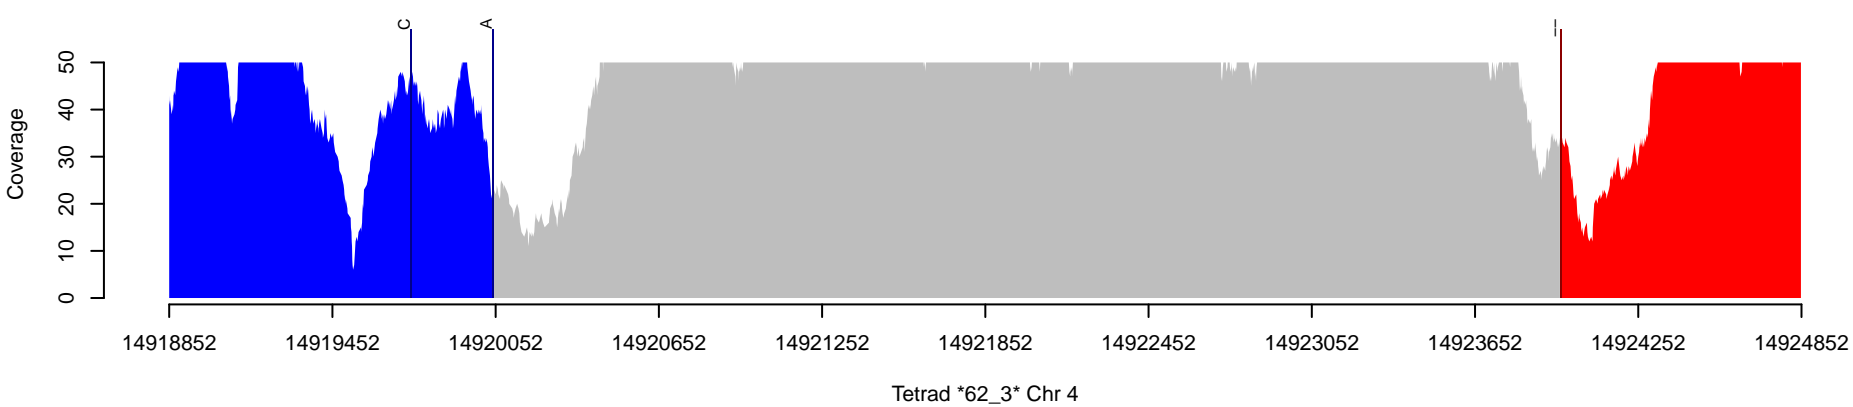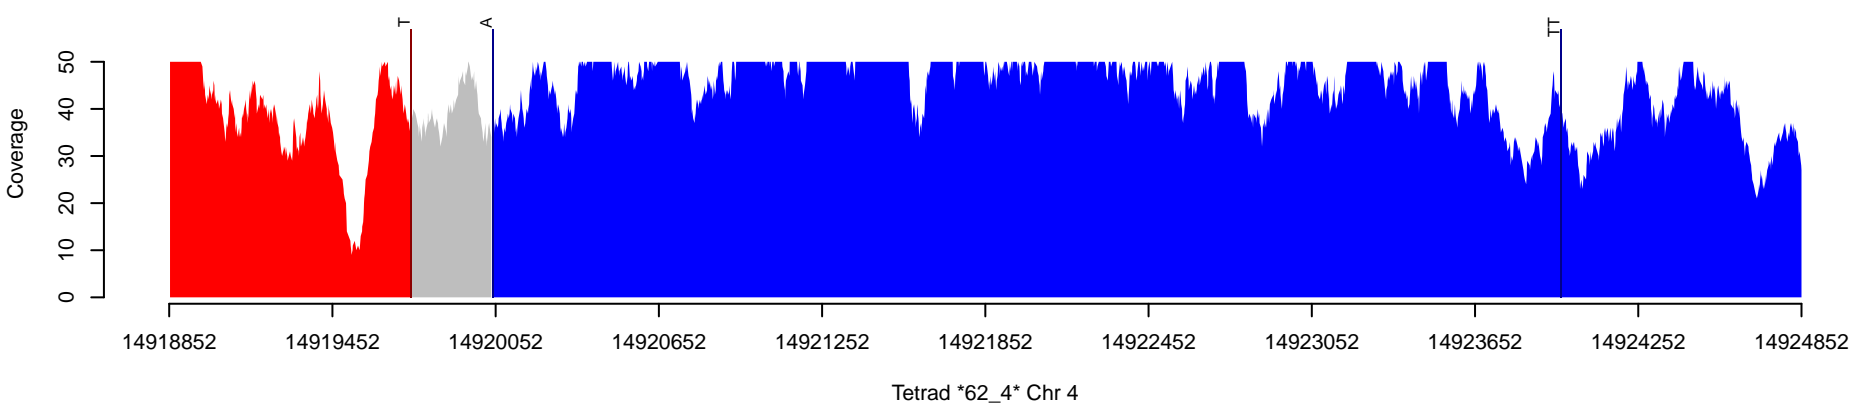

# ID51

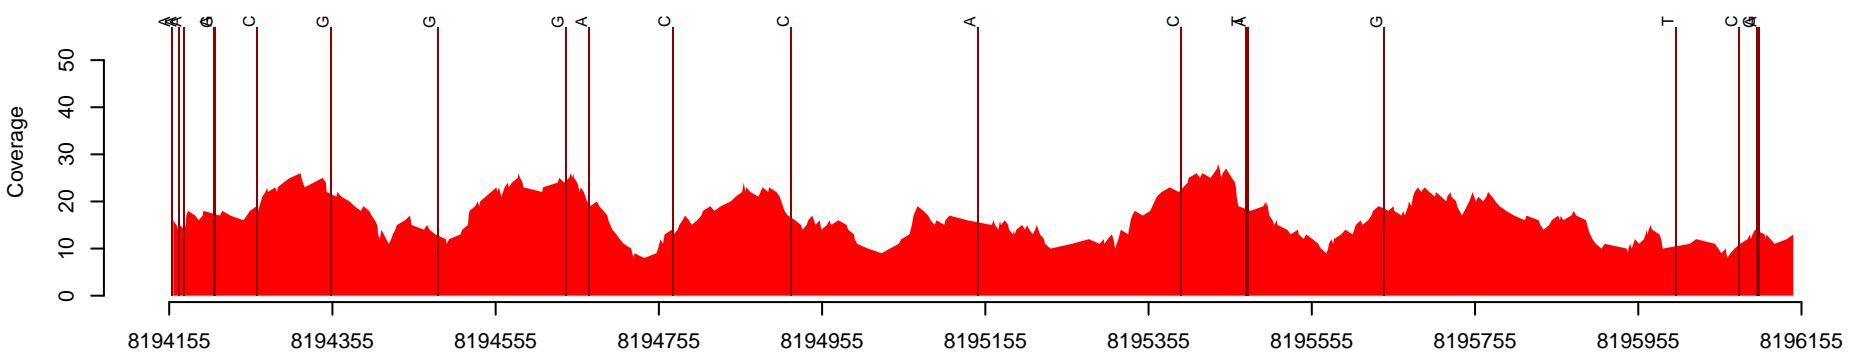

Col-0 Chr 5

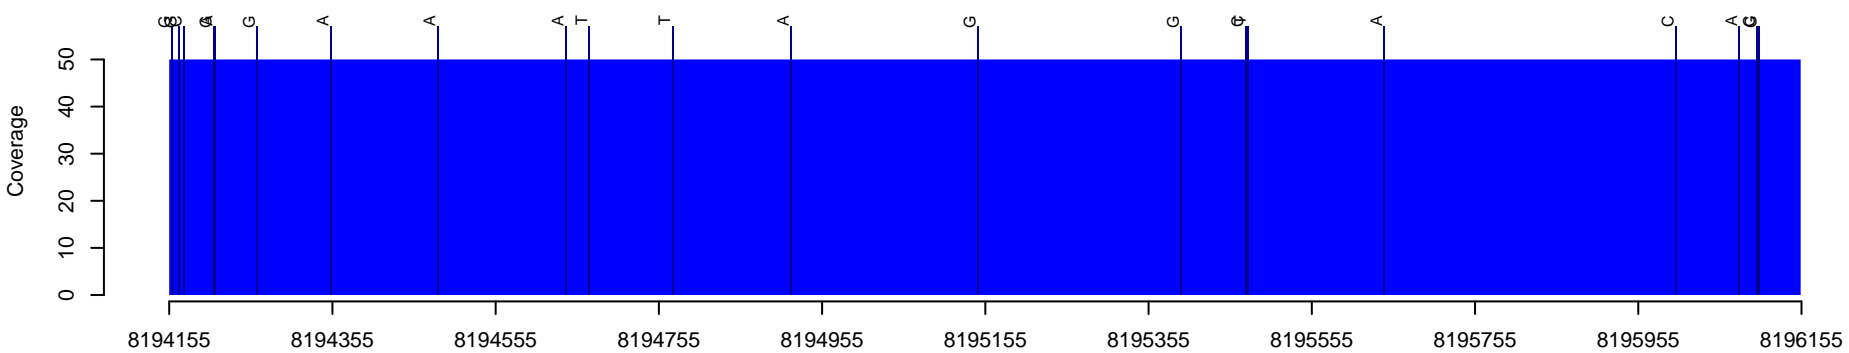

Ler Chr 5

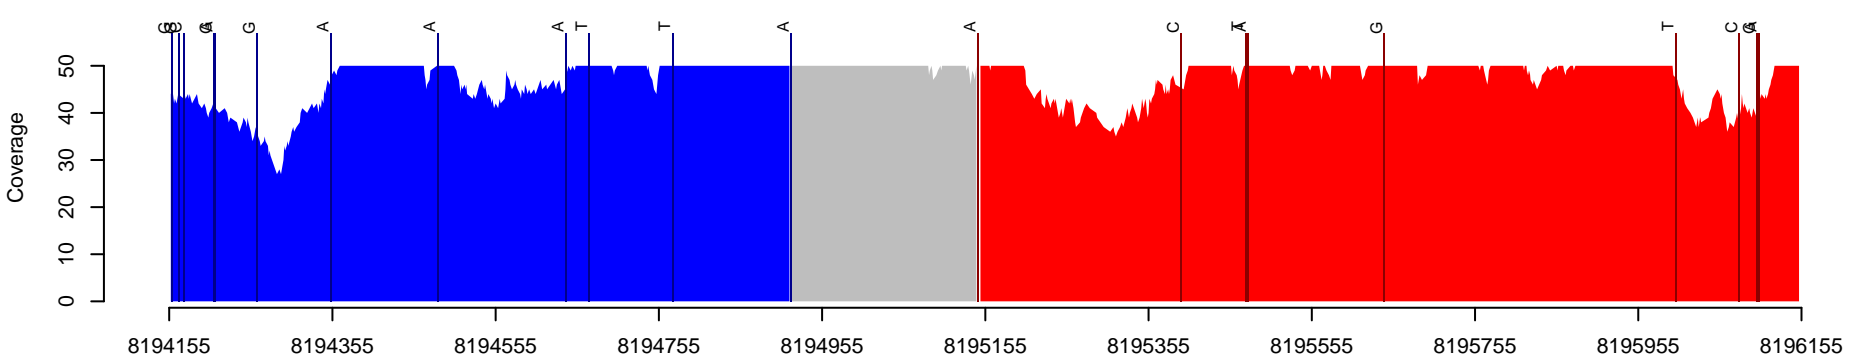

Tetrad \*62\_1\* Chr 5

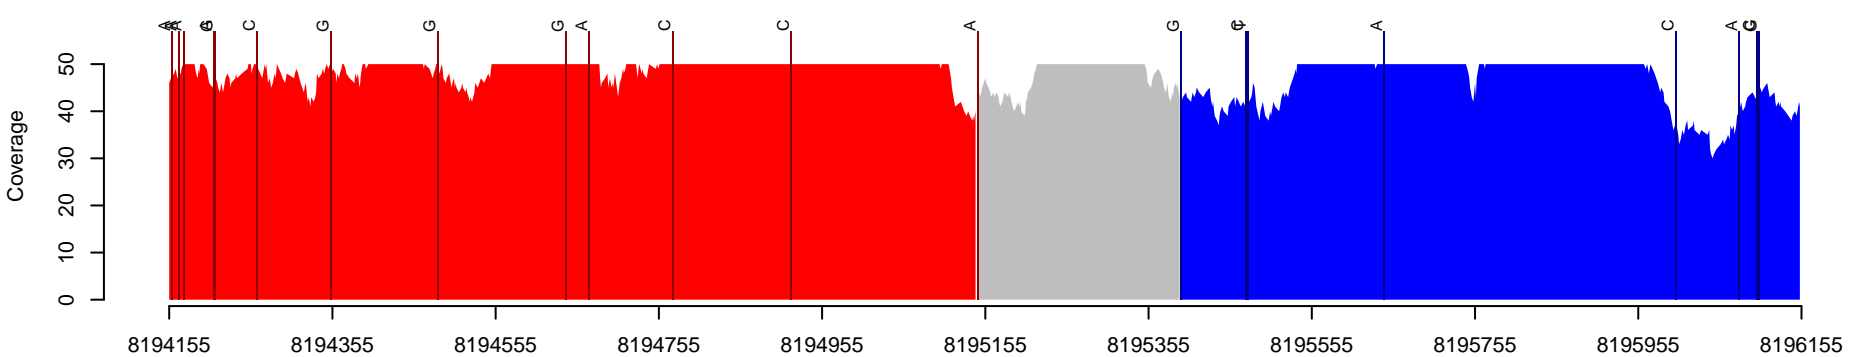

Tetrad \*62\_2\* Chr 5

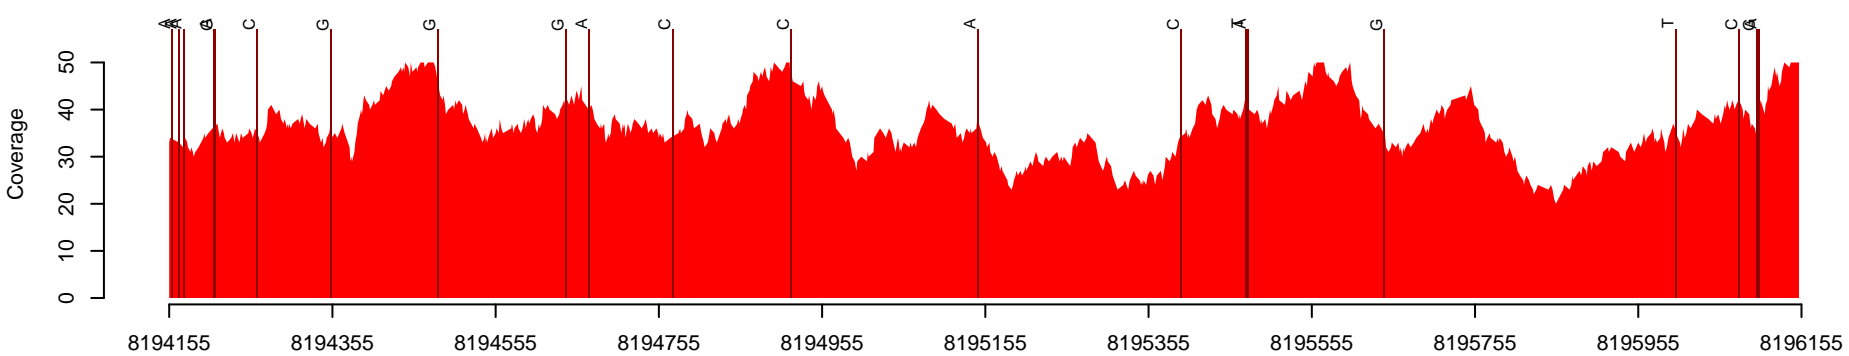

Tetrad 62\_3 Chr 5

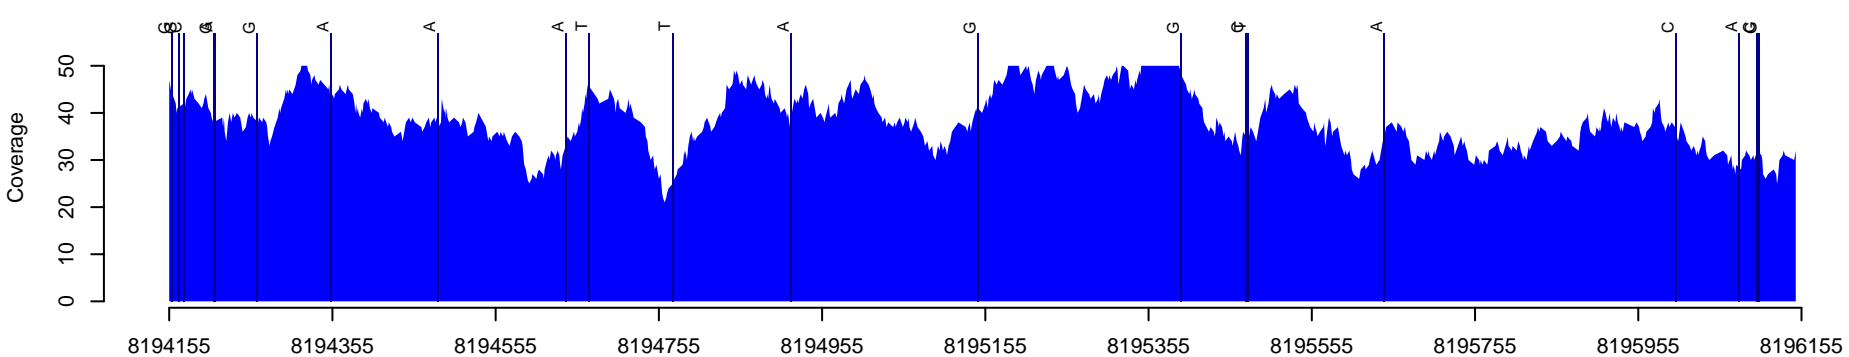

Tetrad 62\_4 Chr 5

# ID52

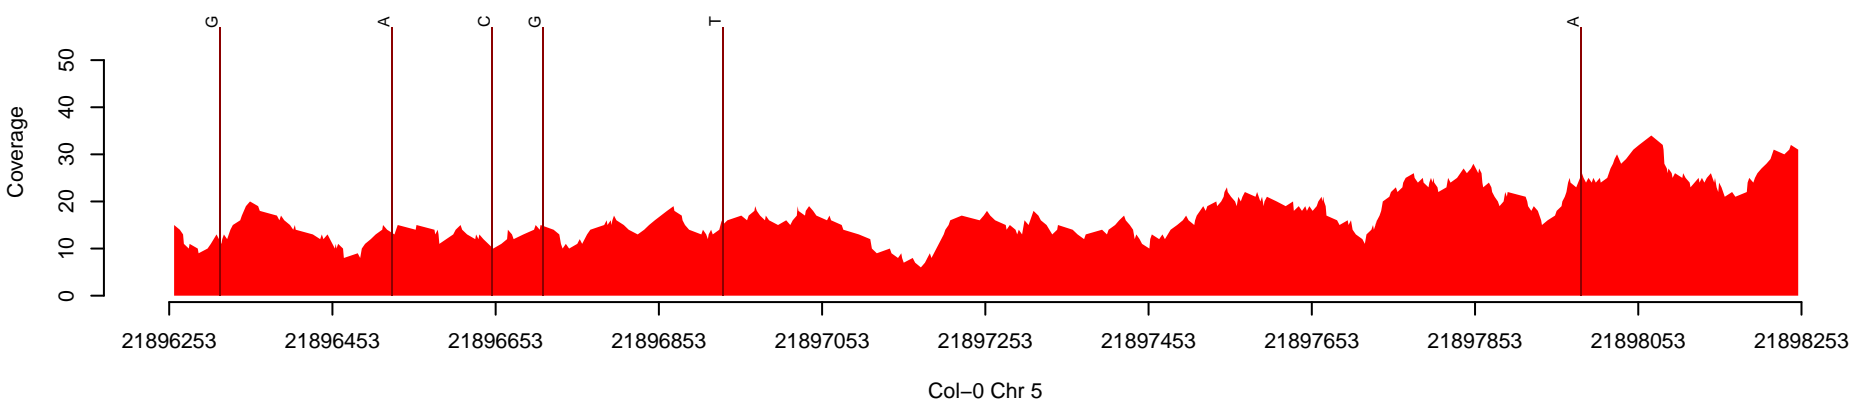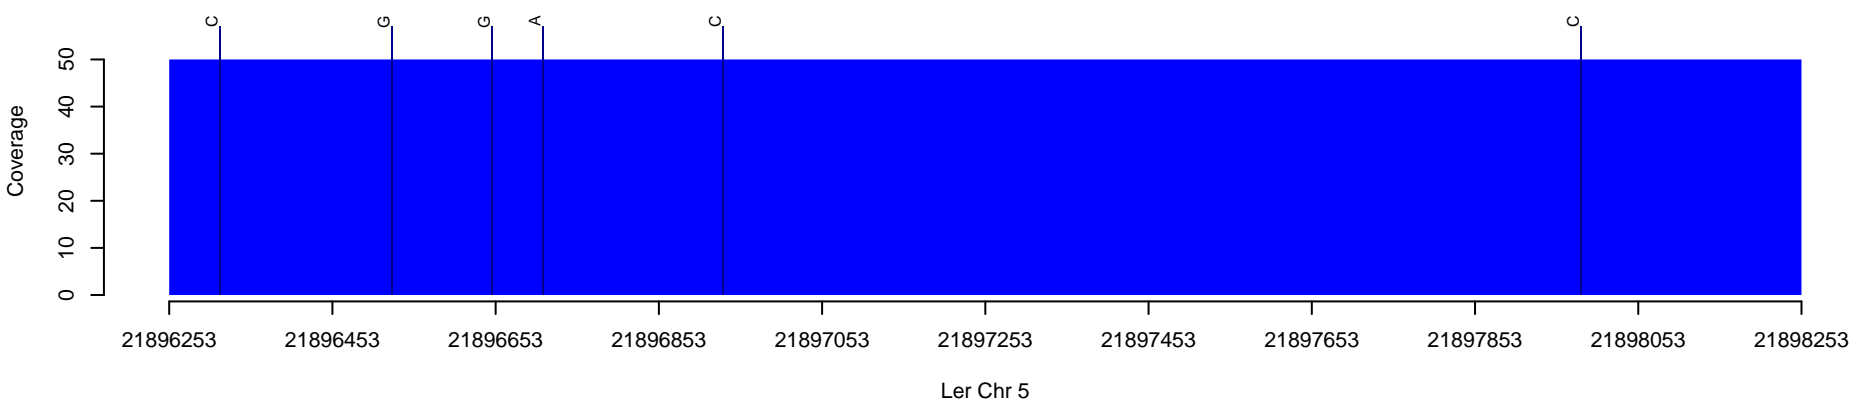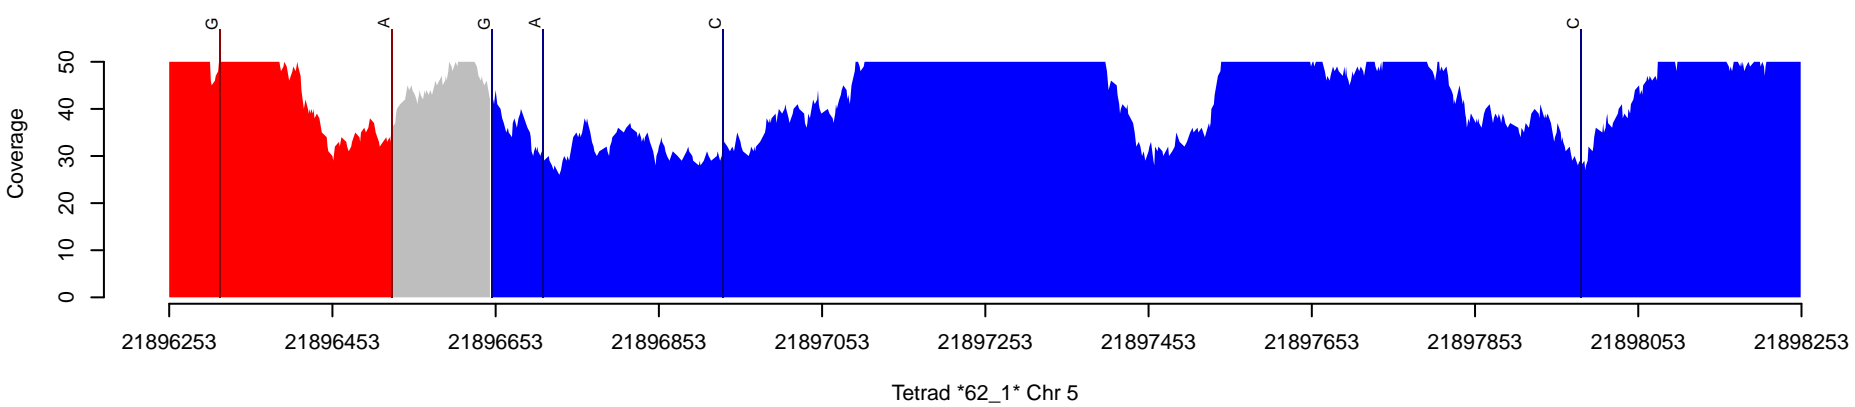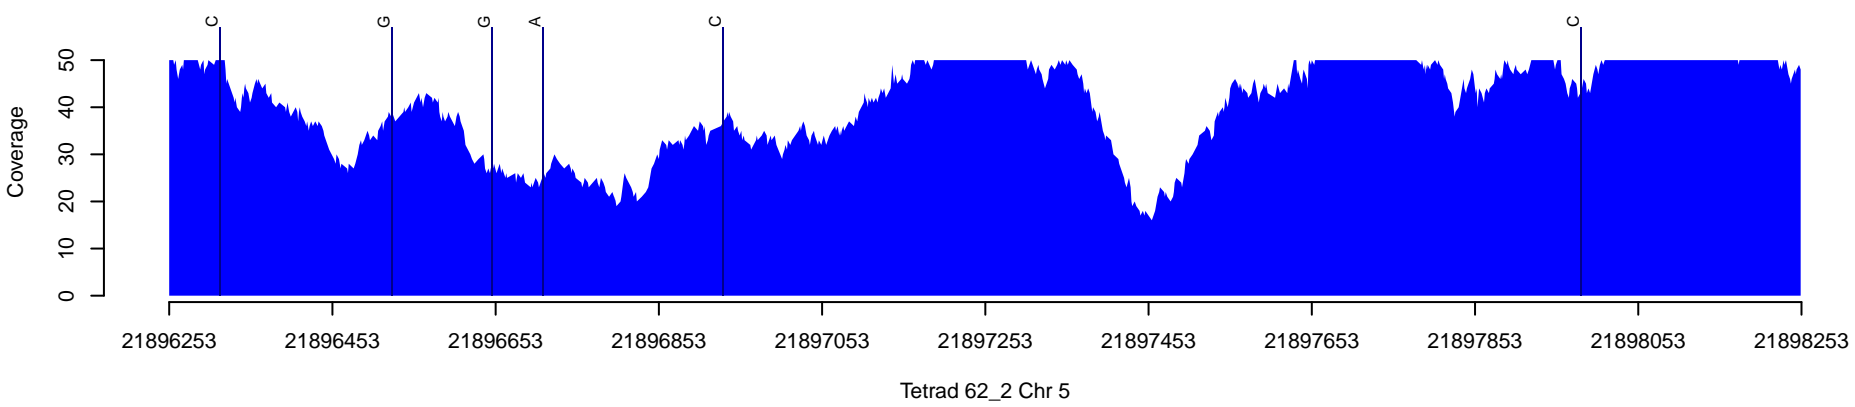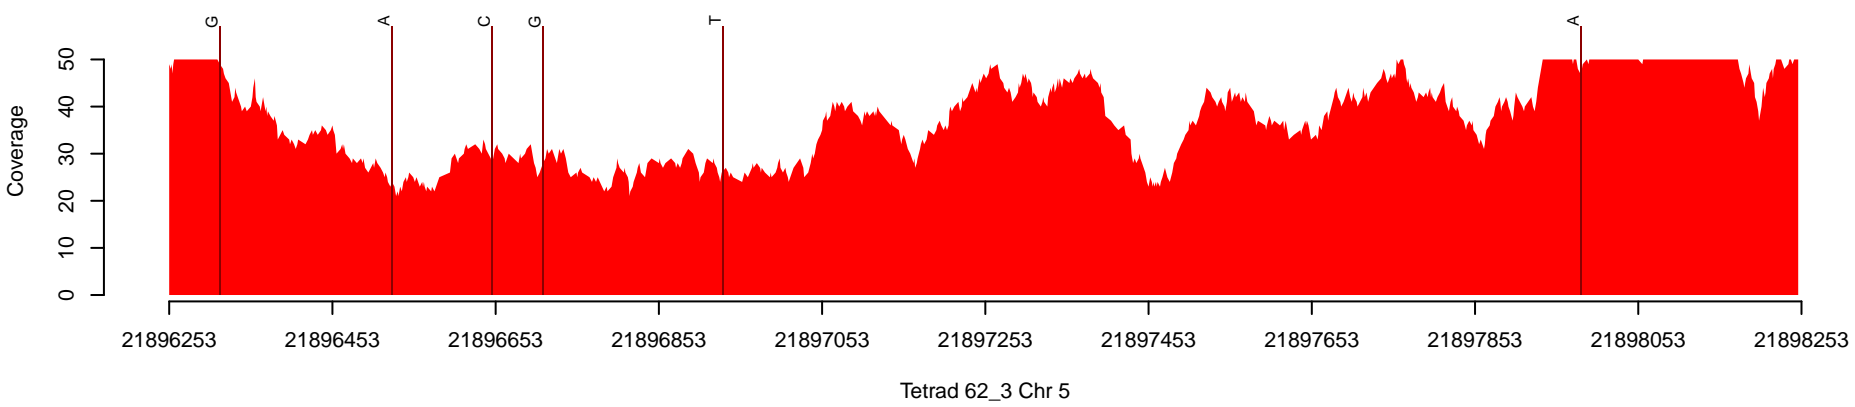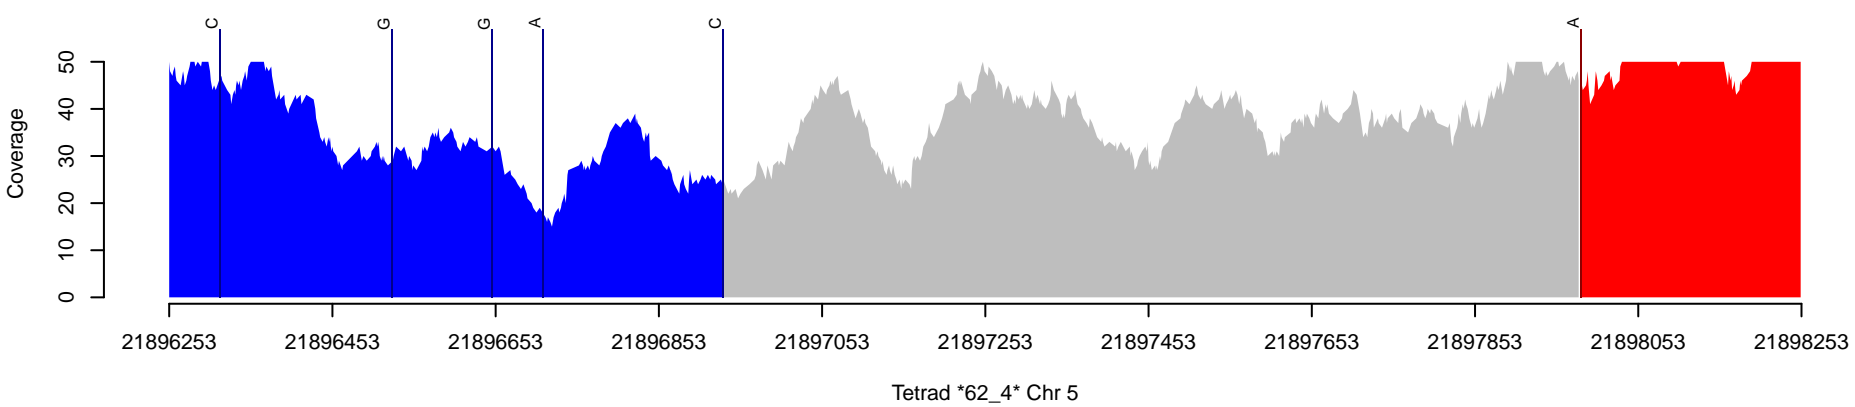

# ID53

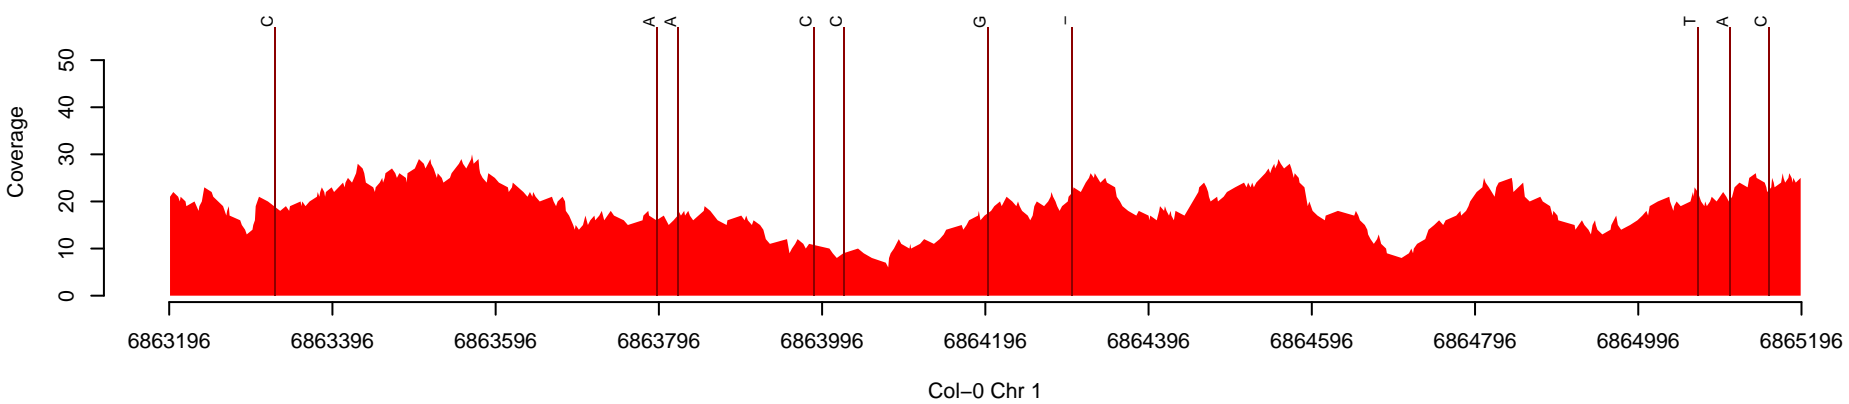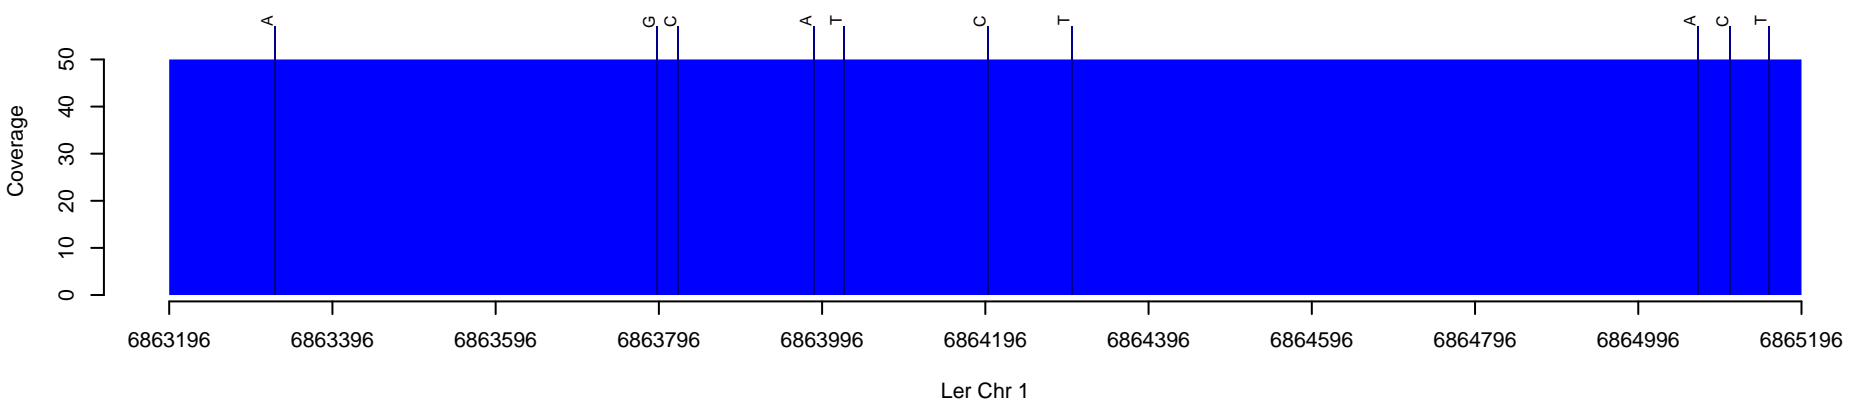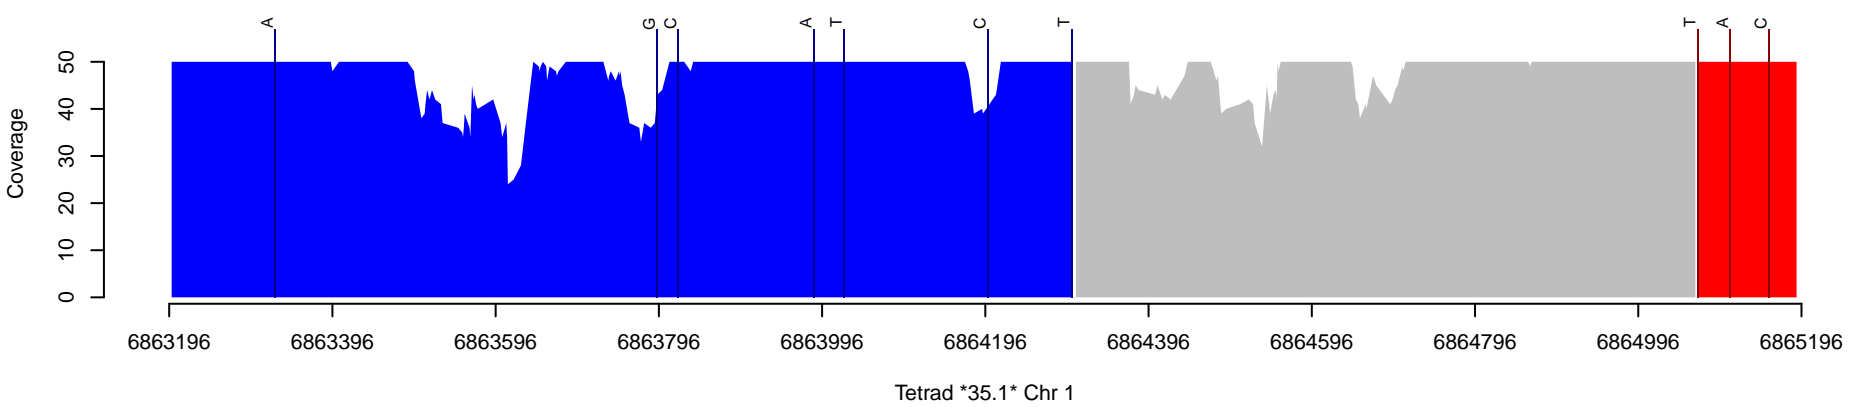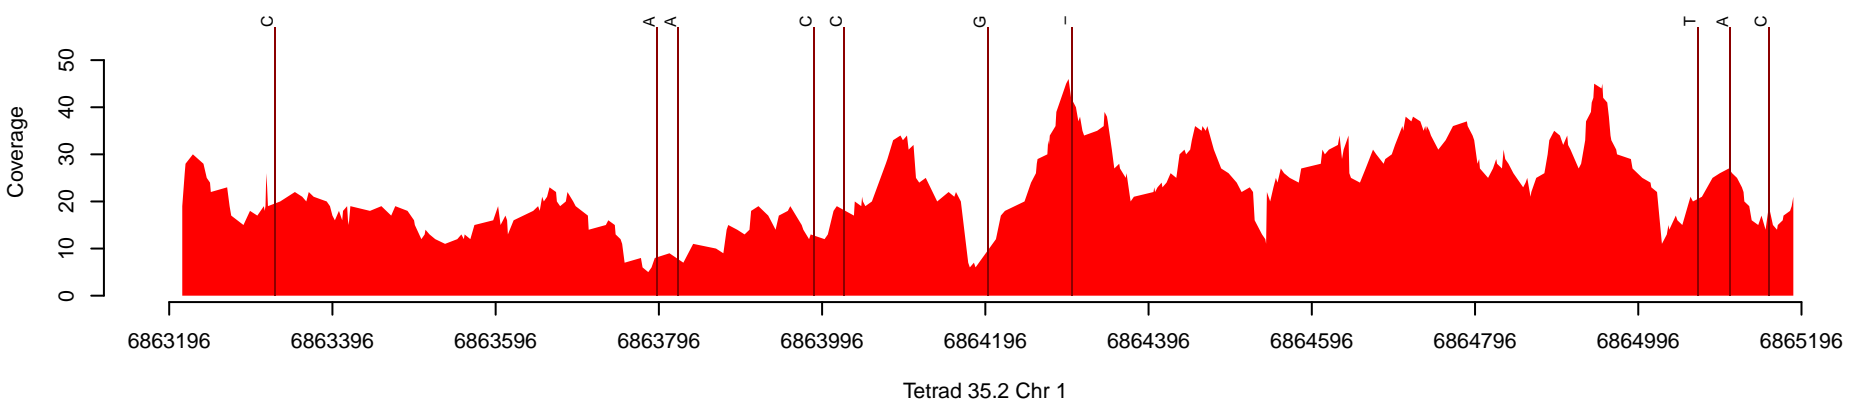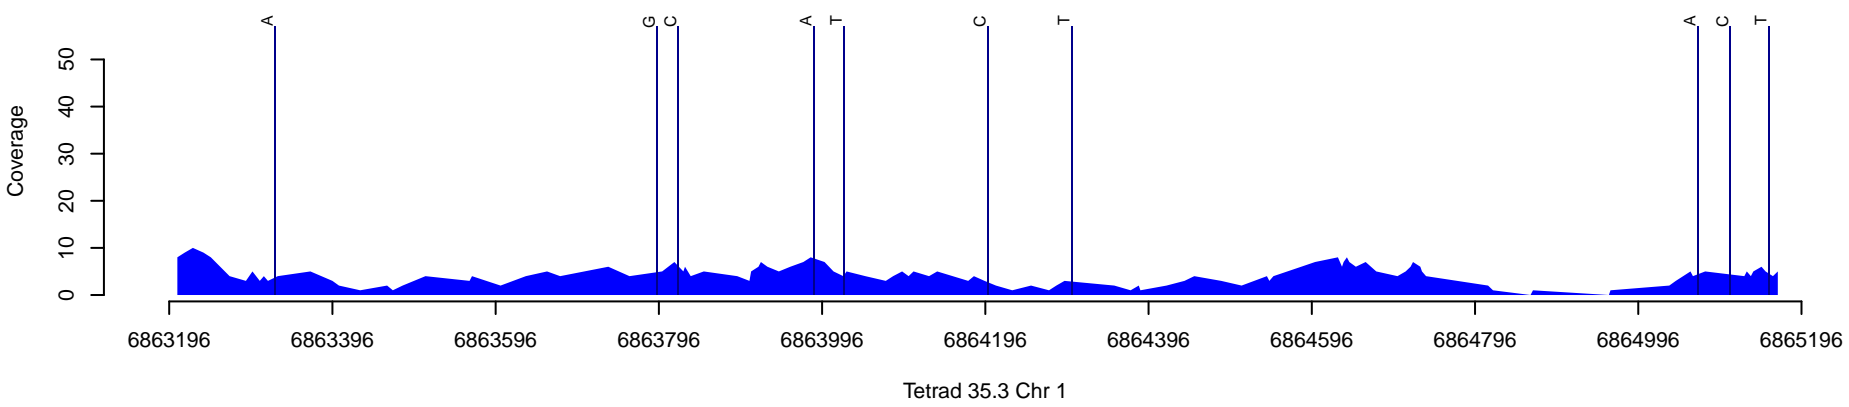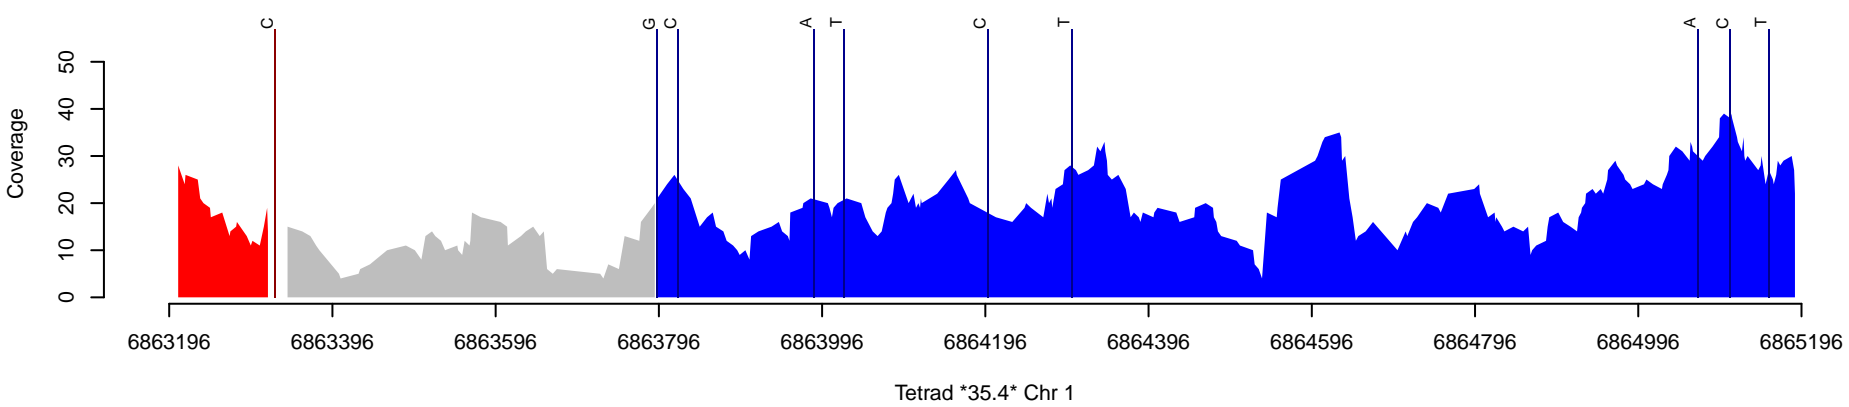

# ID54

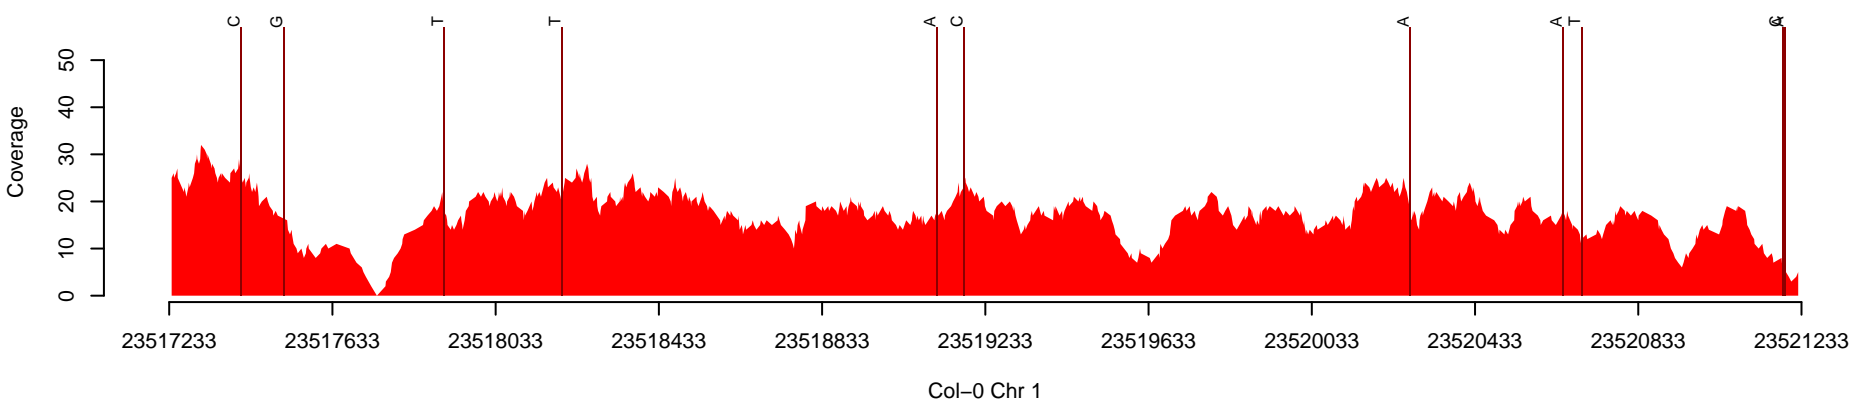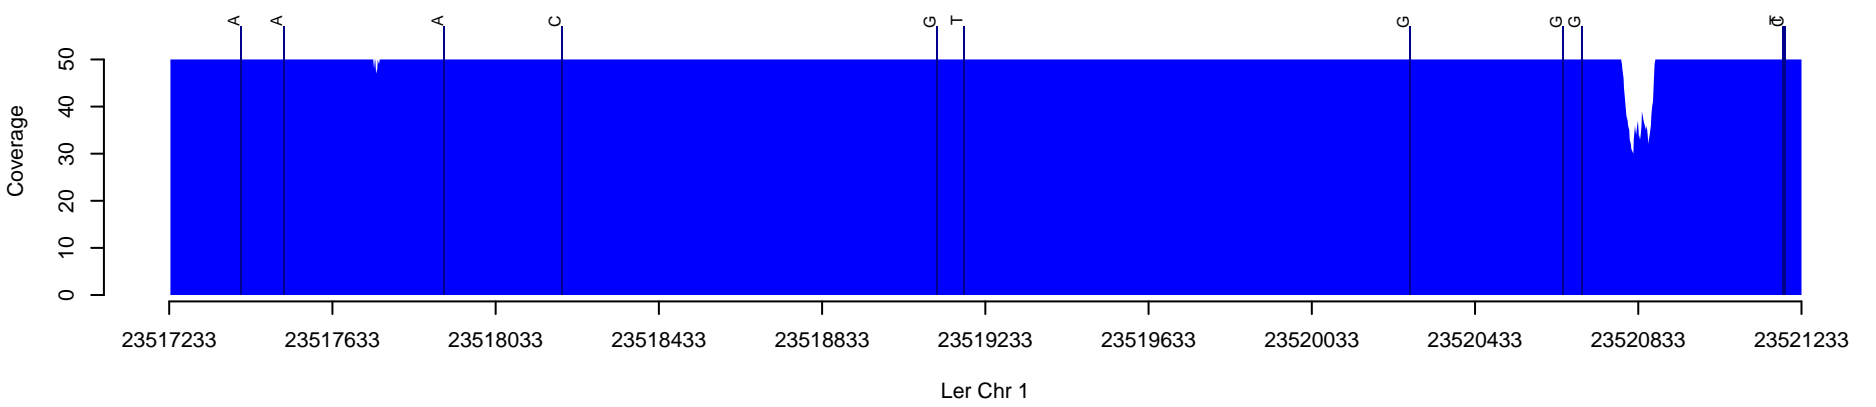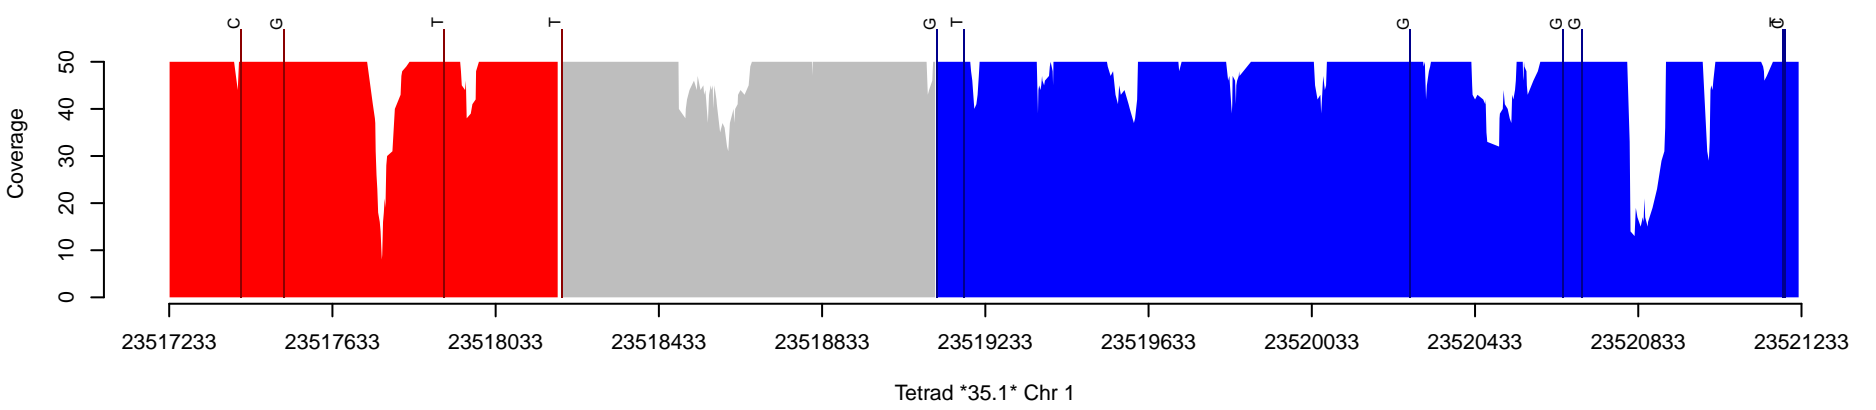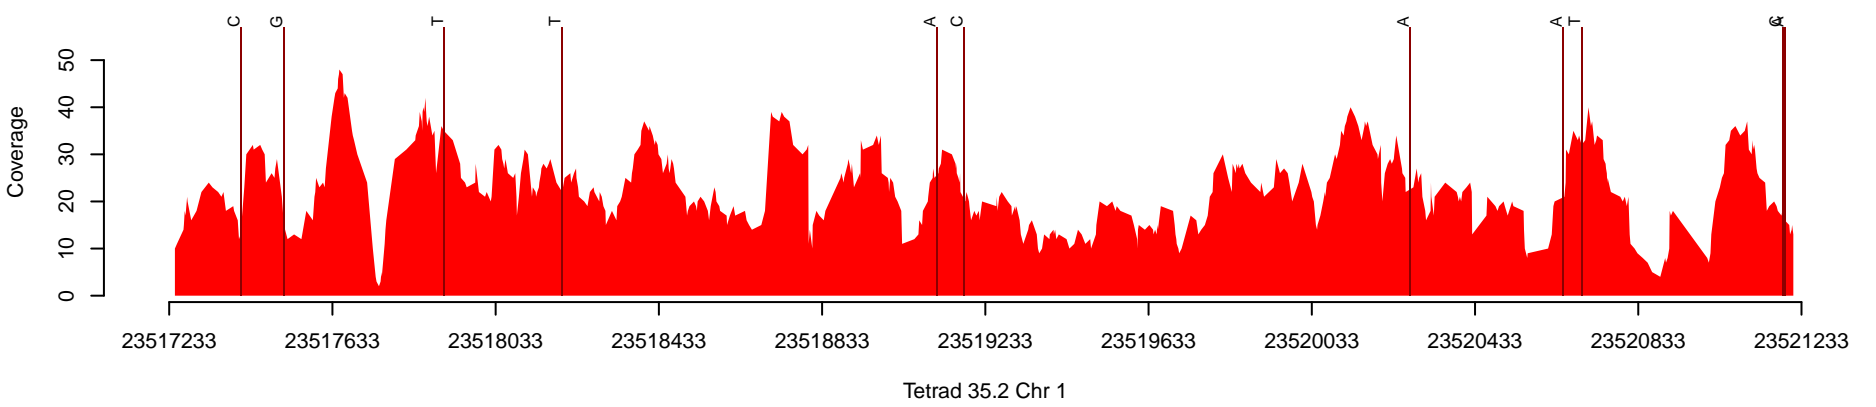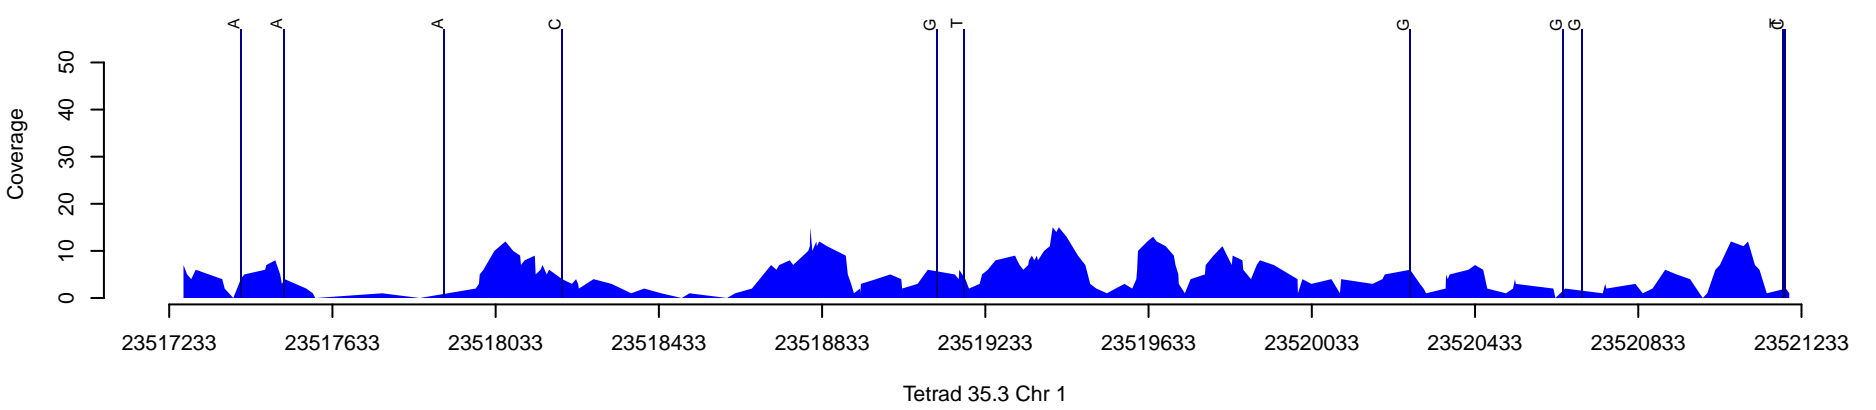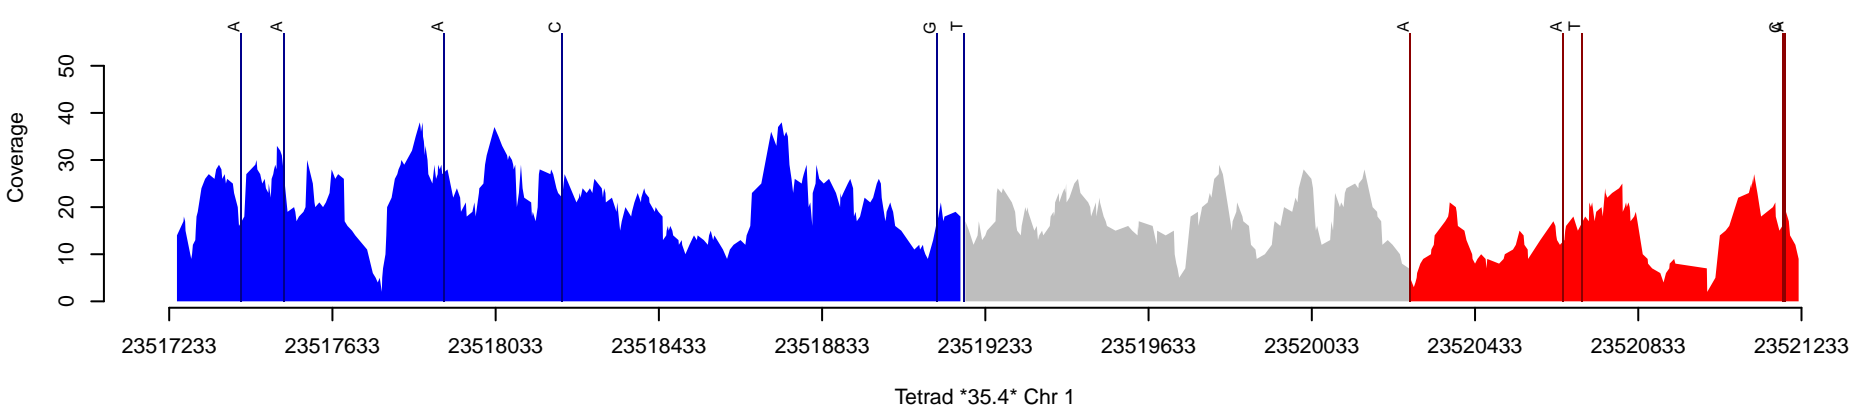

# ID55

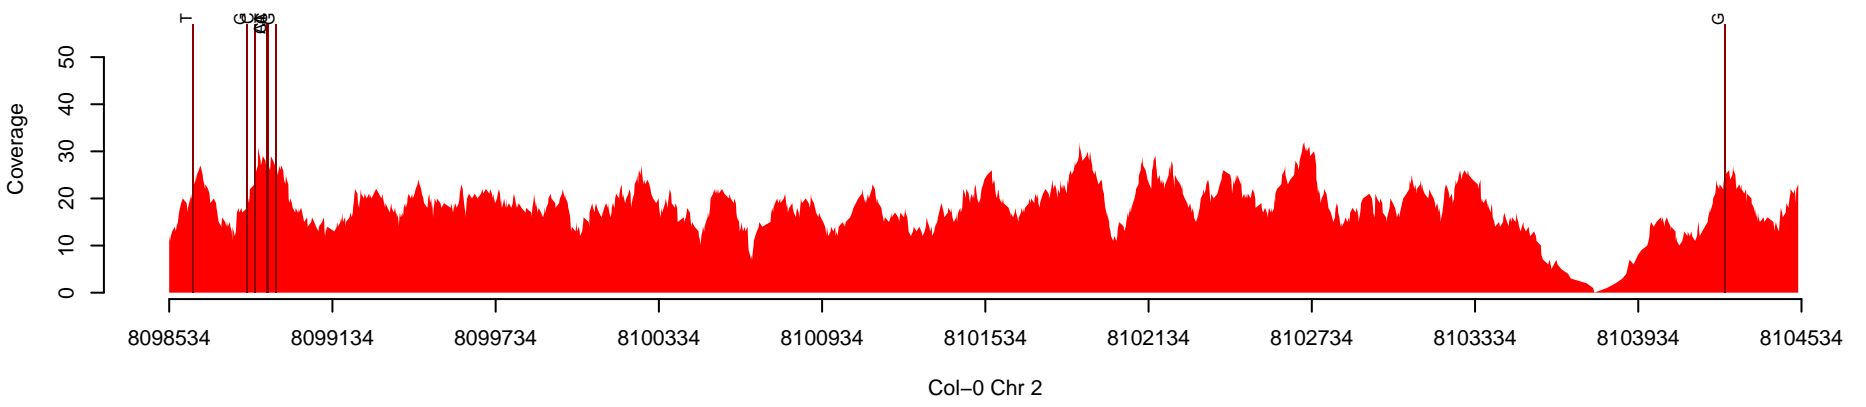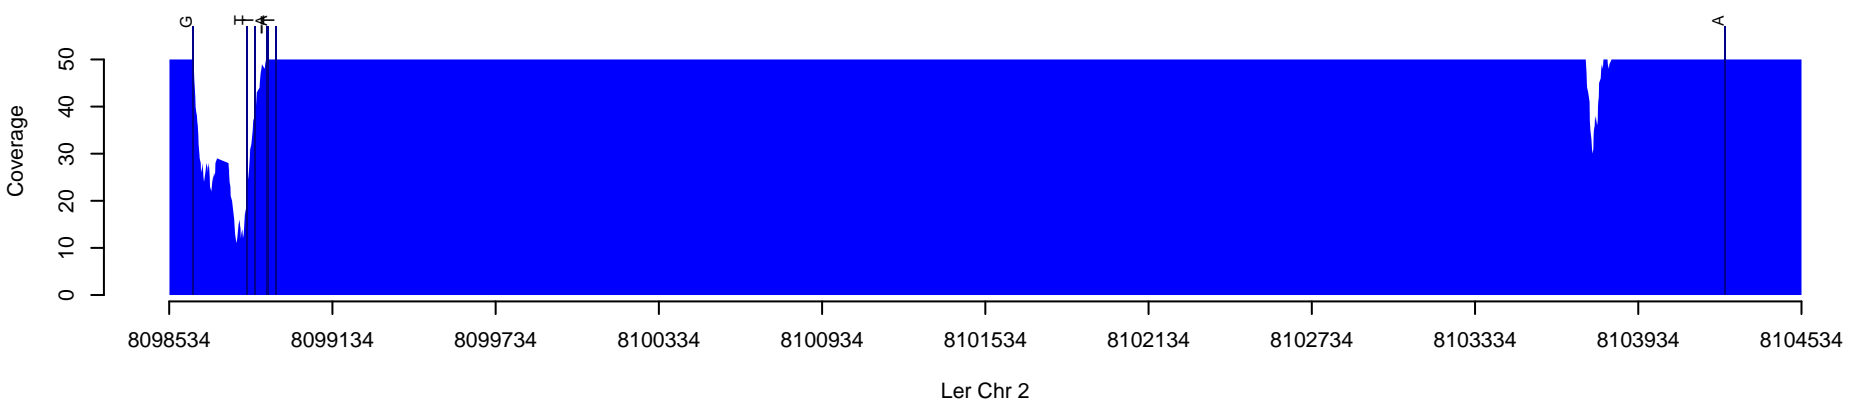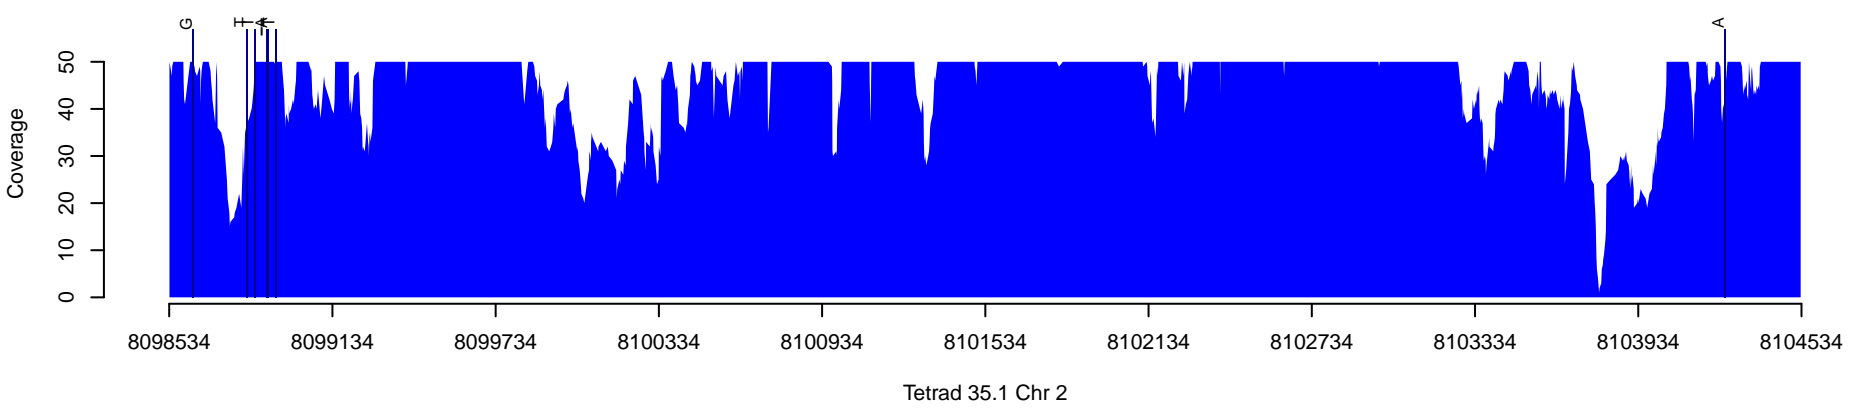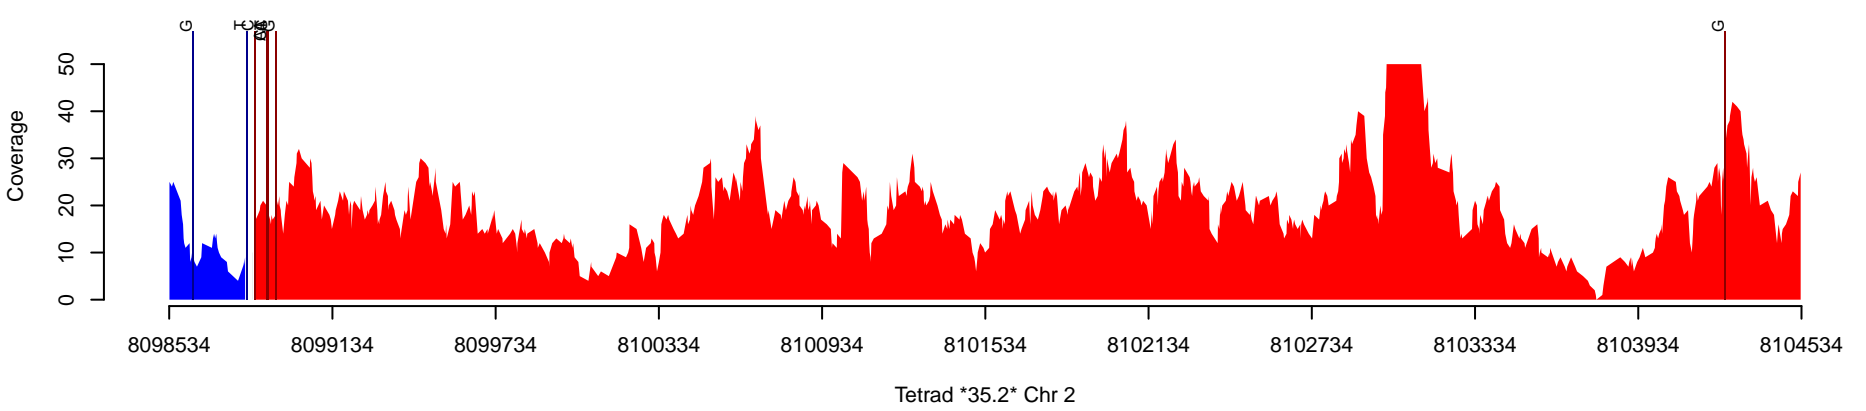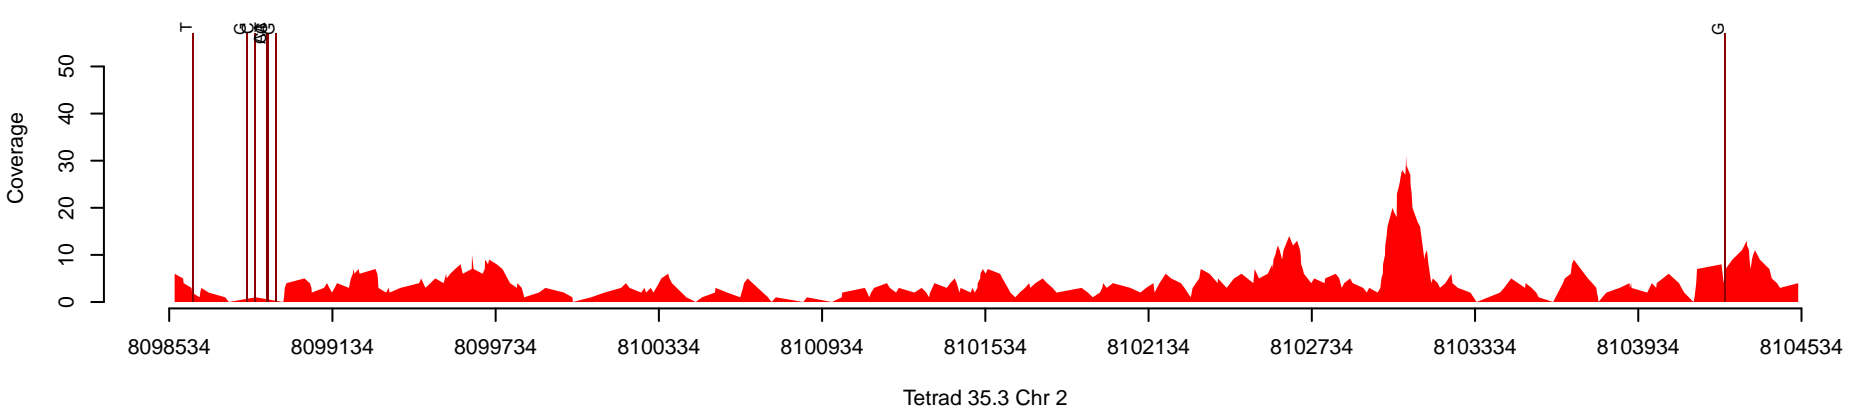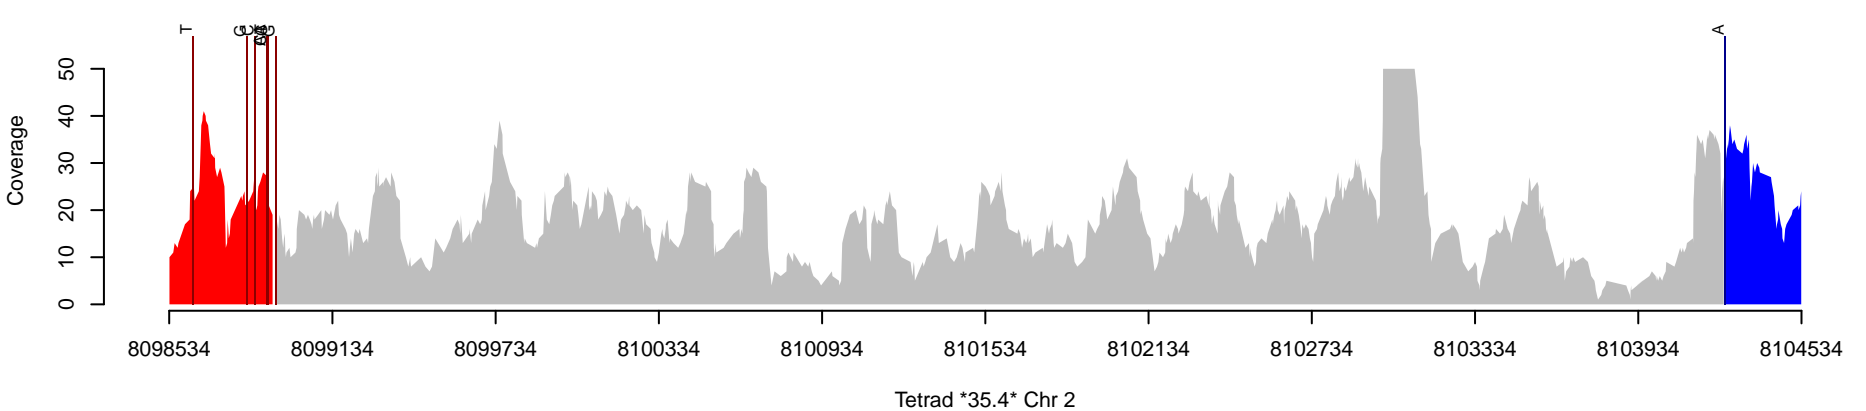

# ID56

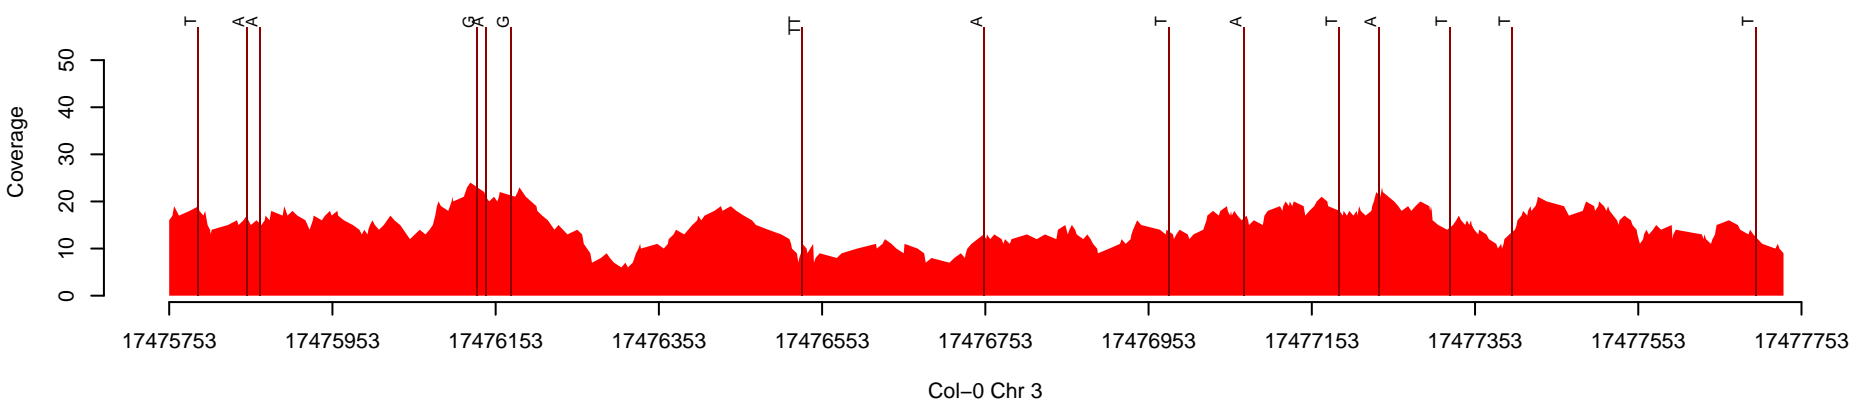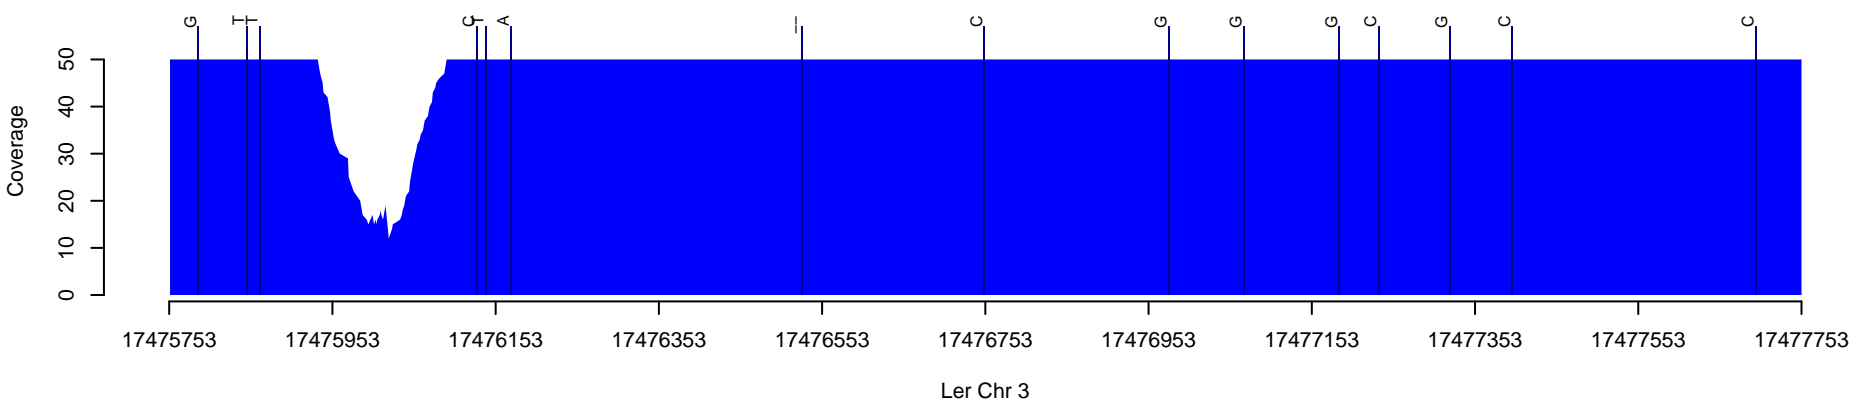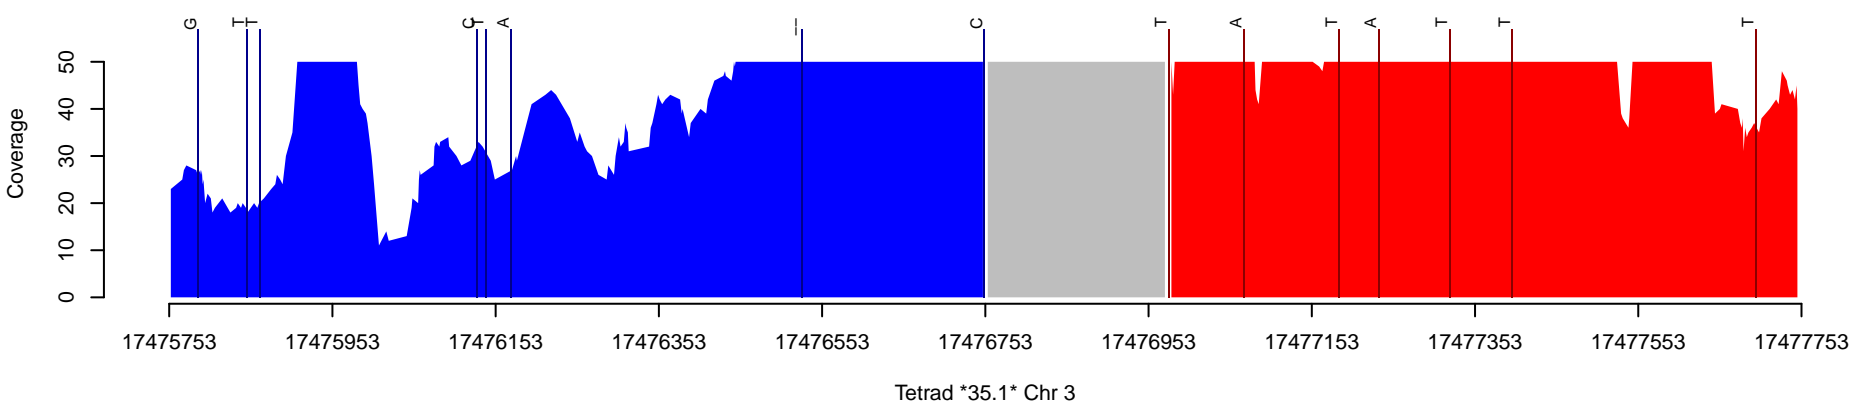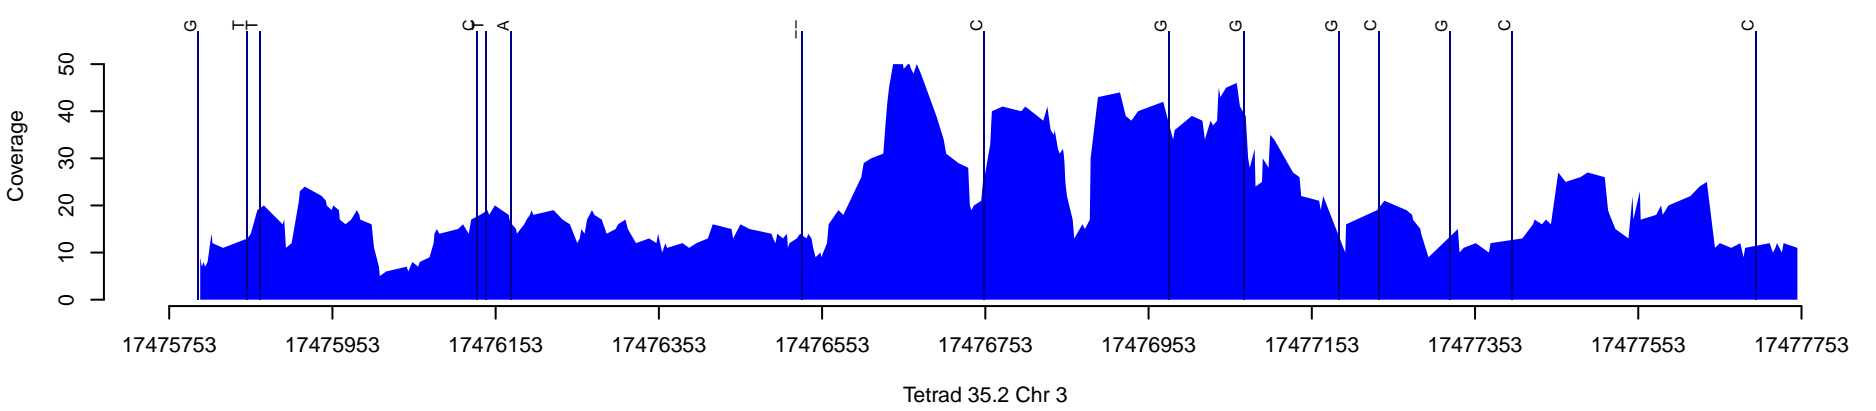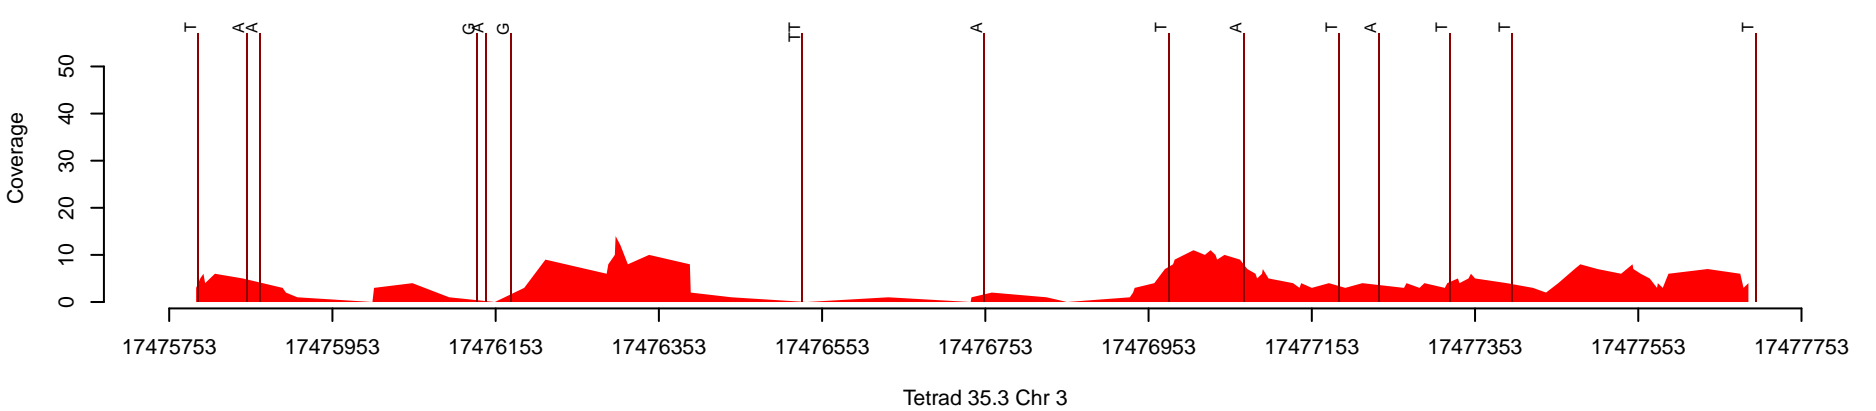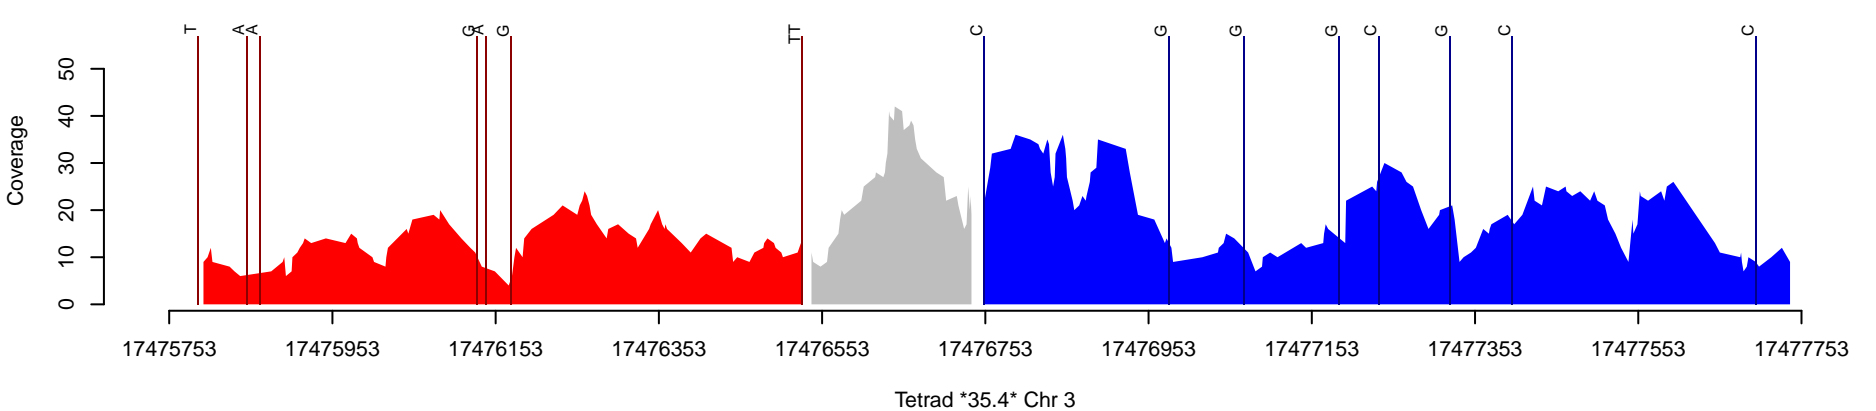



# ID57

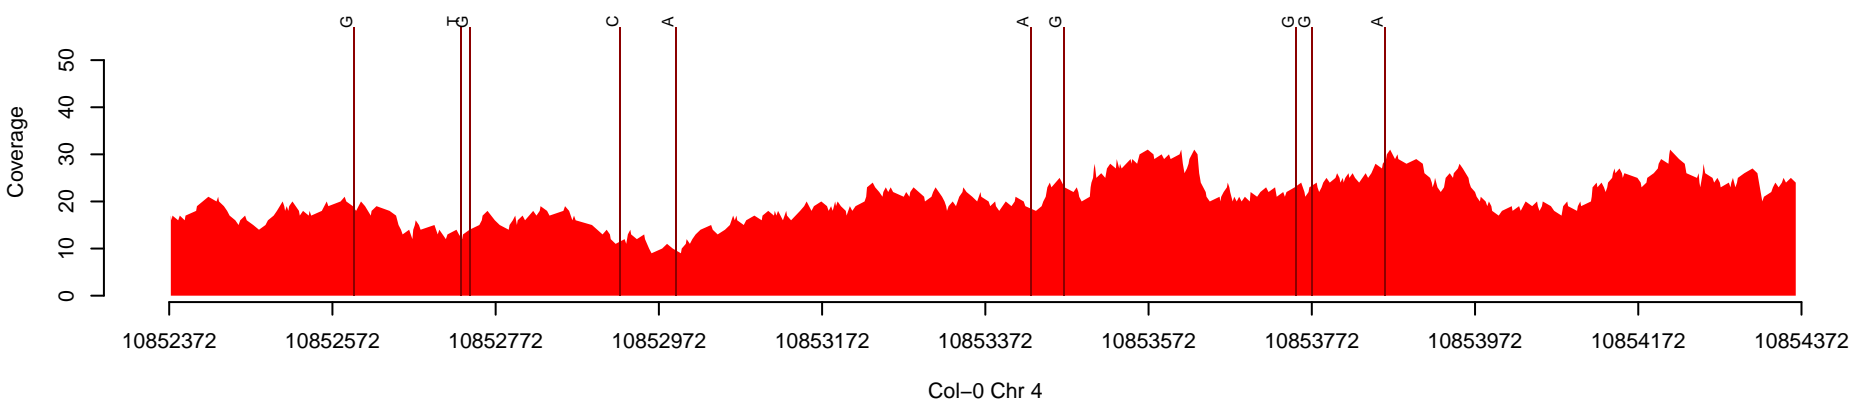

Col-0 Chr 4

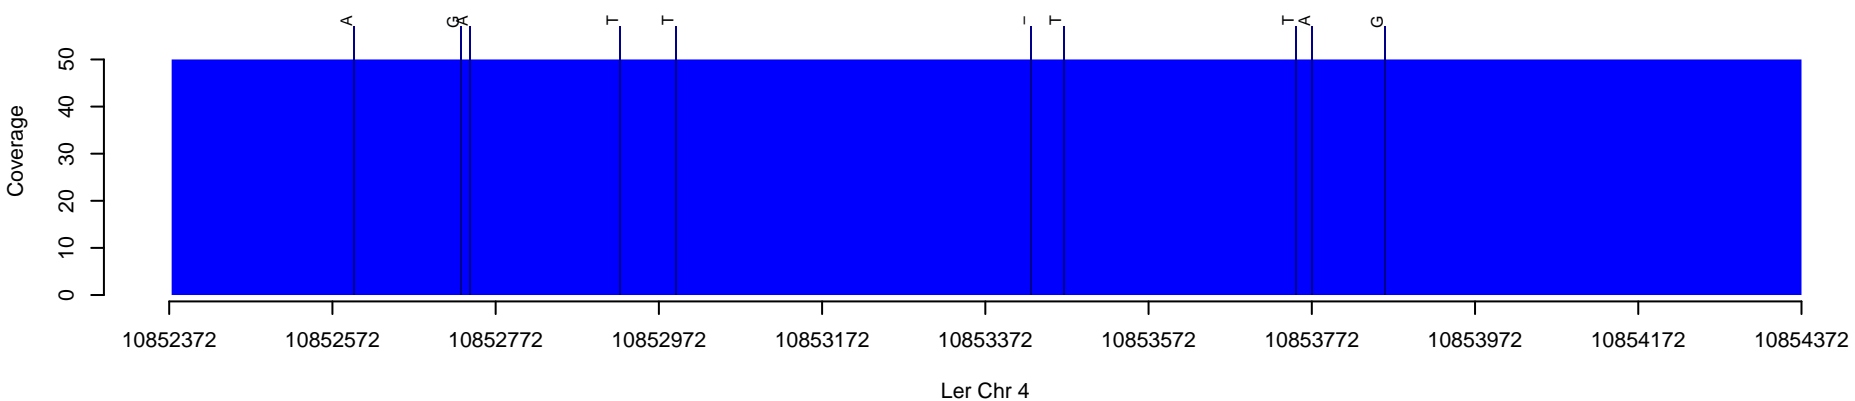

Ler Chr 4

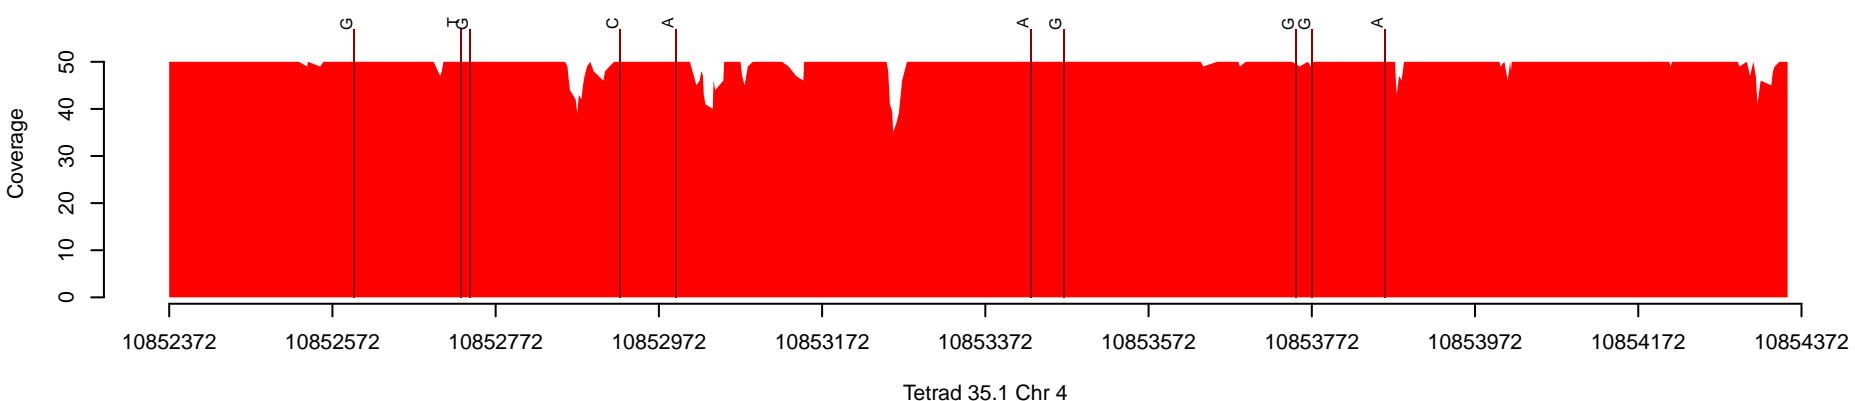

Tetrad 35.1 Chr 4

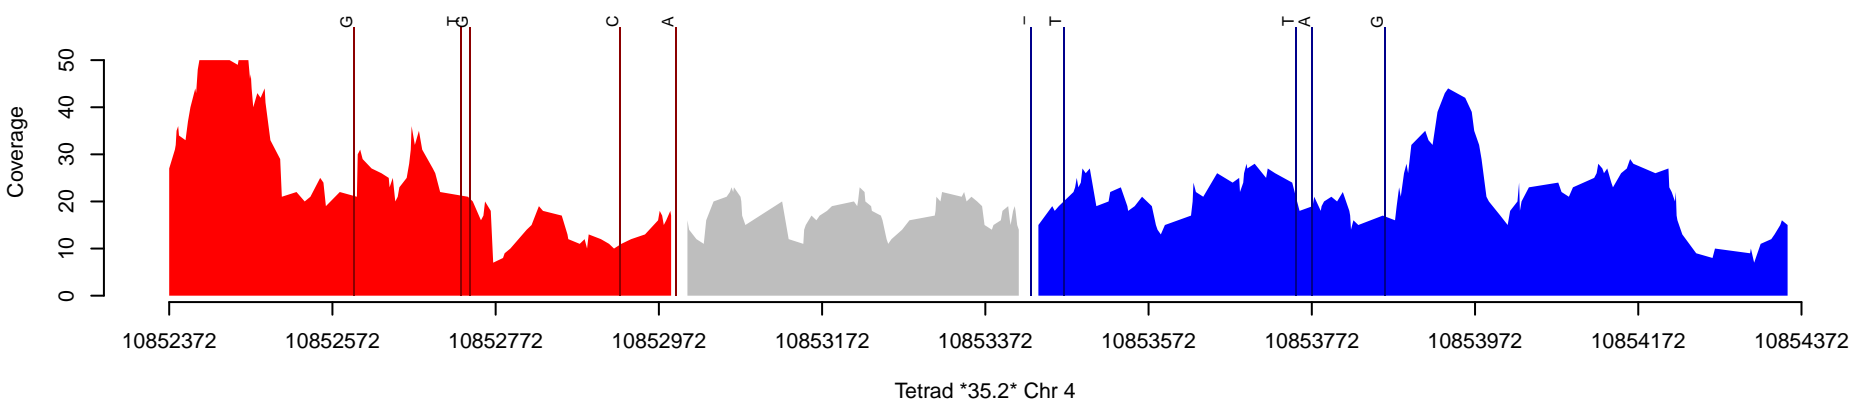

Tetrad \*35.2\* Chr 4

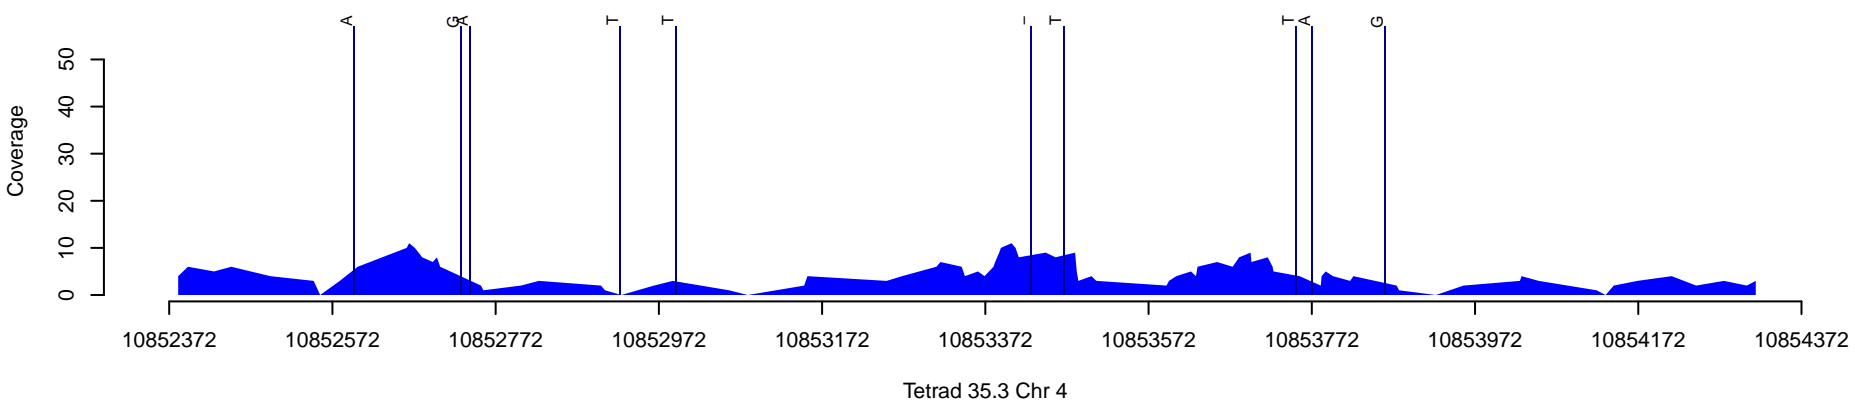

Tetrad 35.3 Chr 4

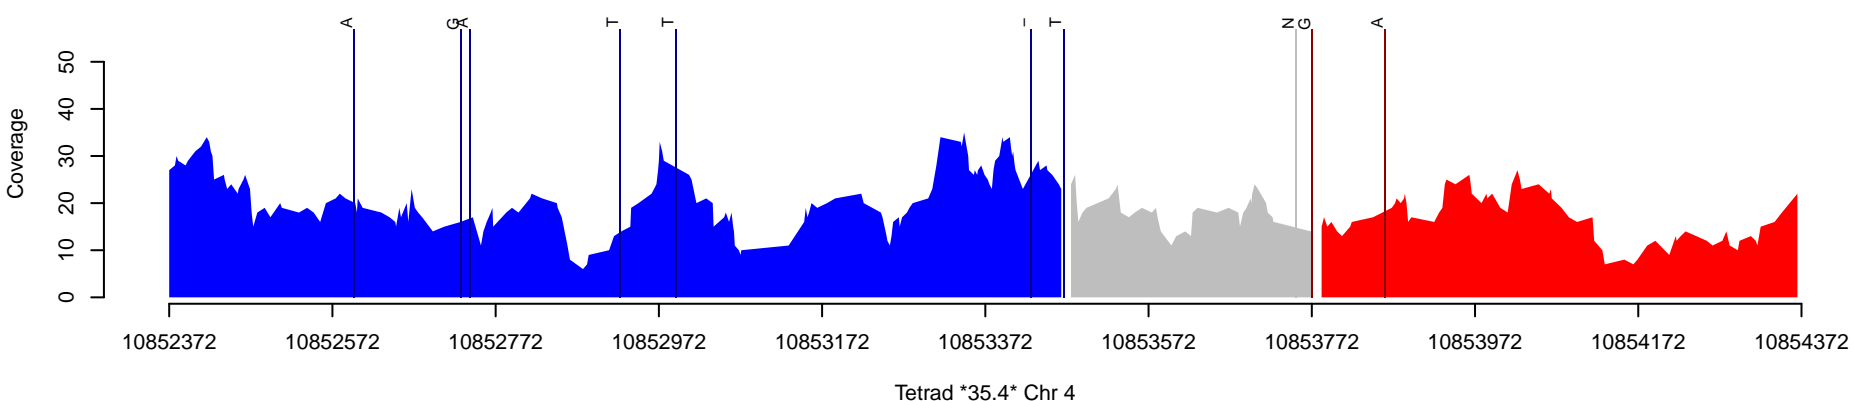

Tetrad \*35.4\* Chr 4

# ID58

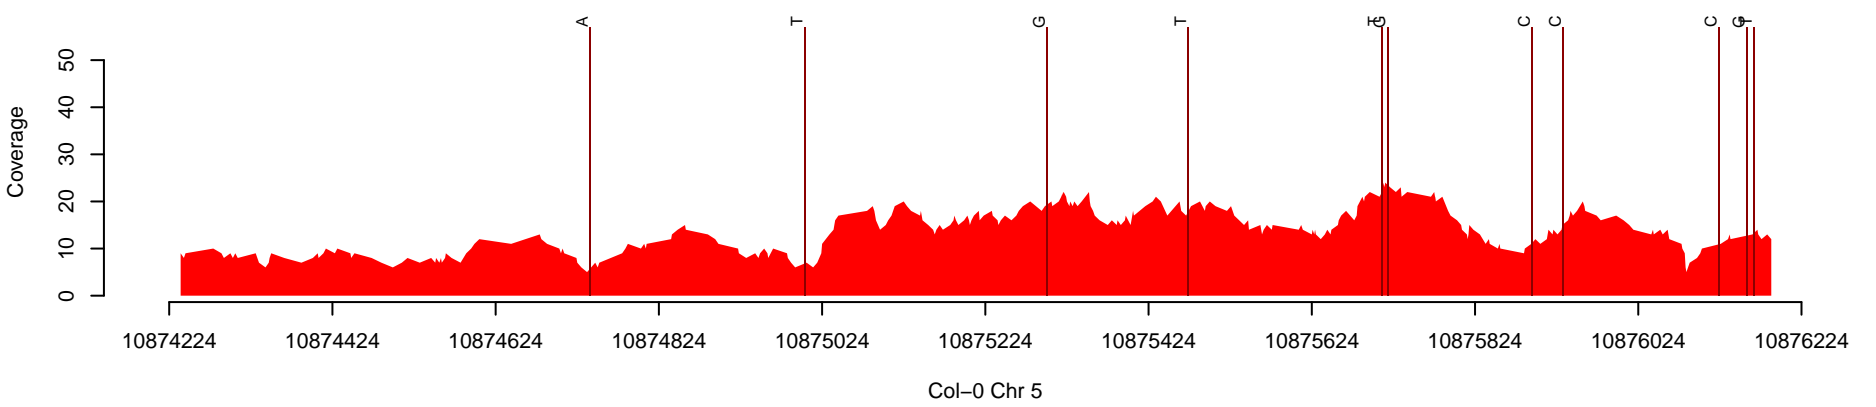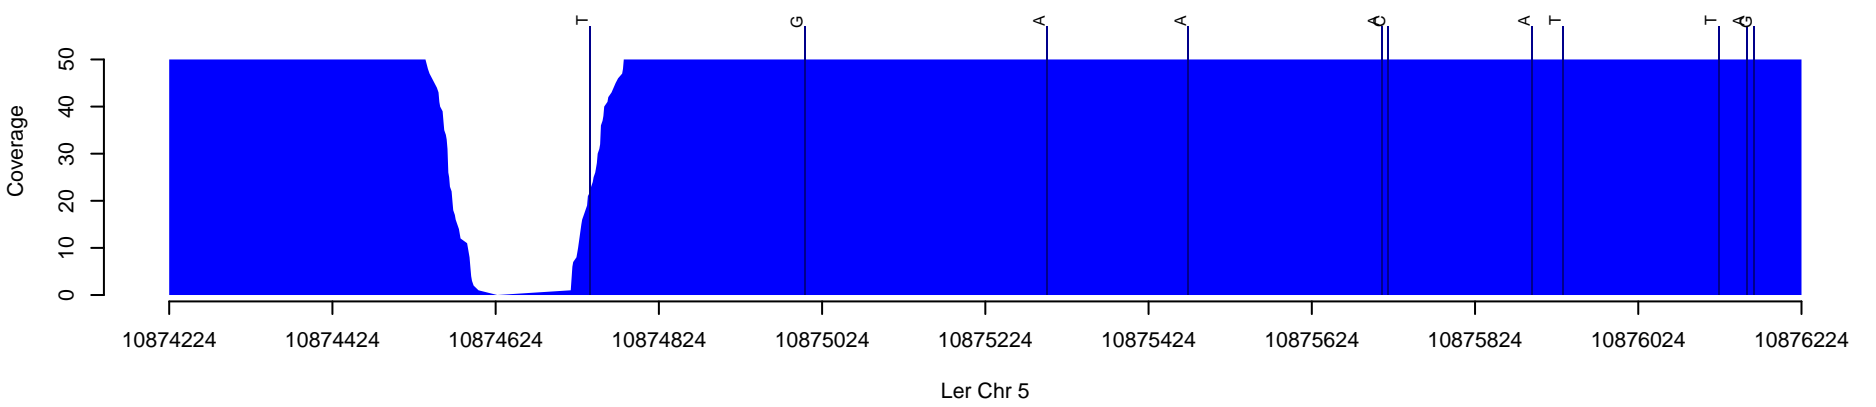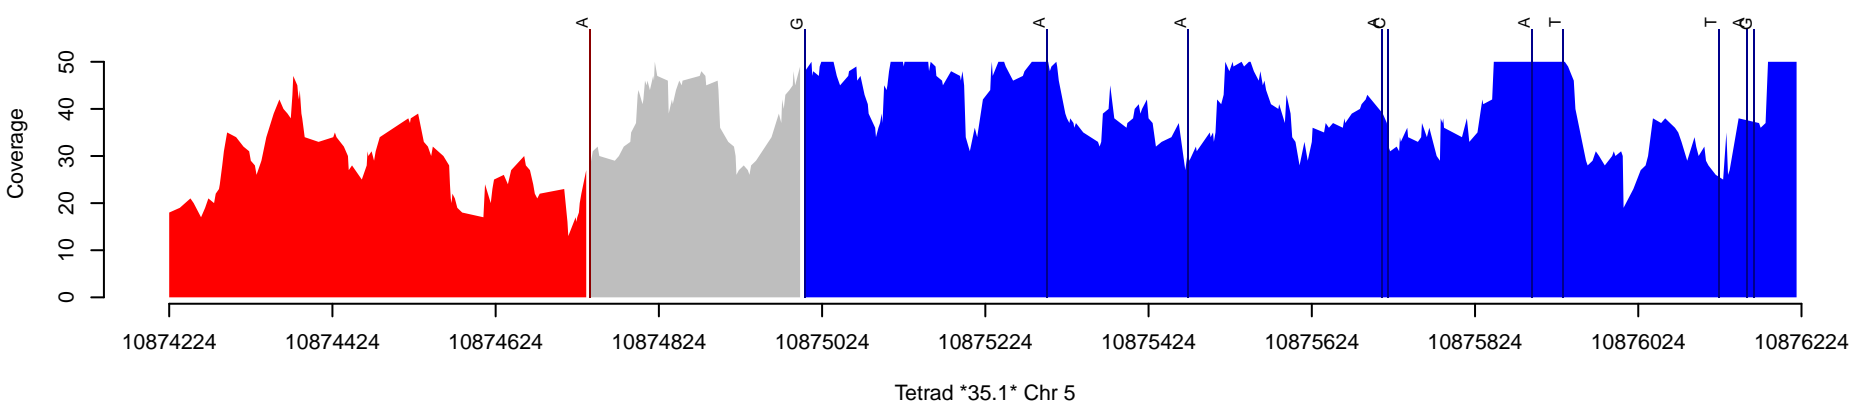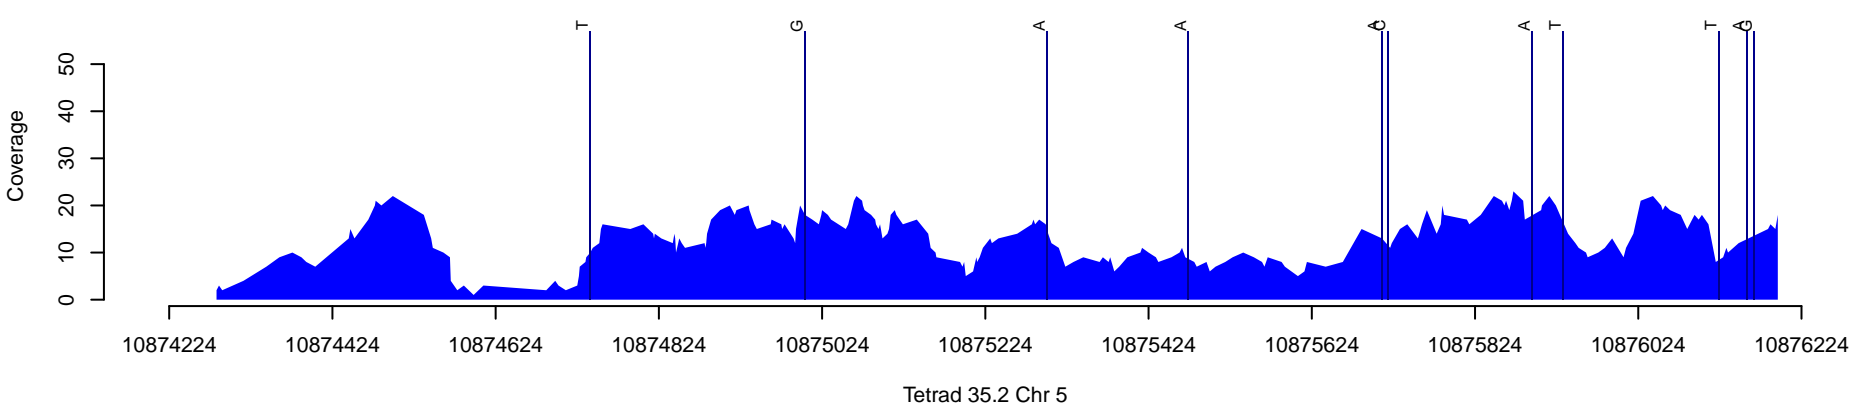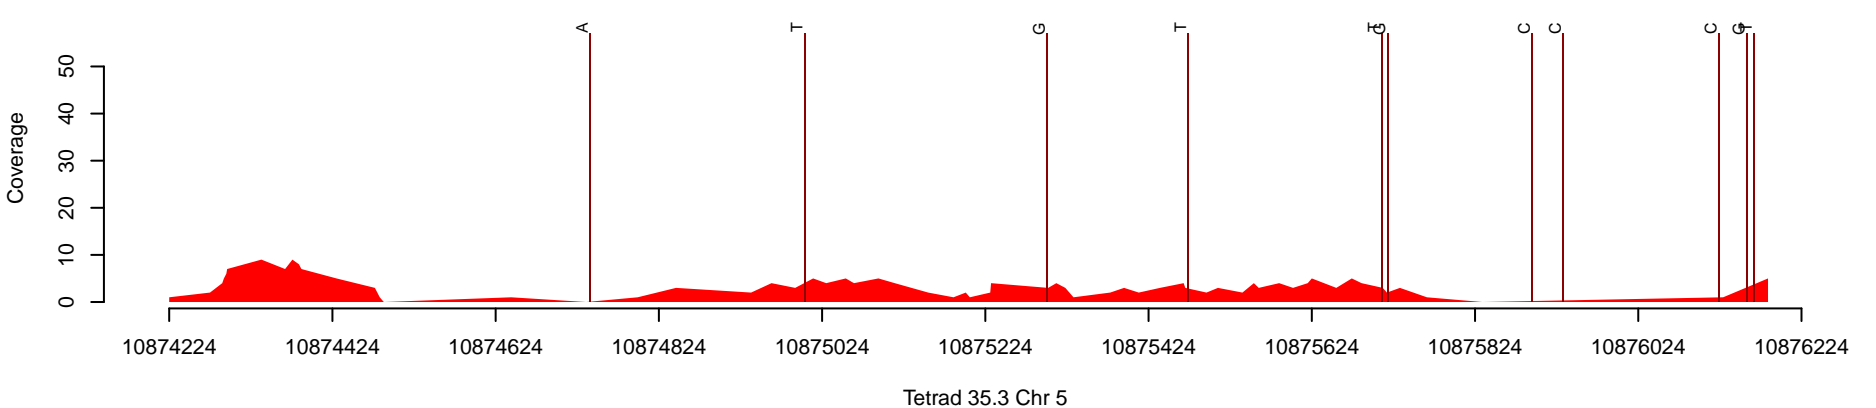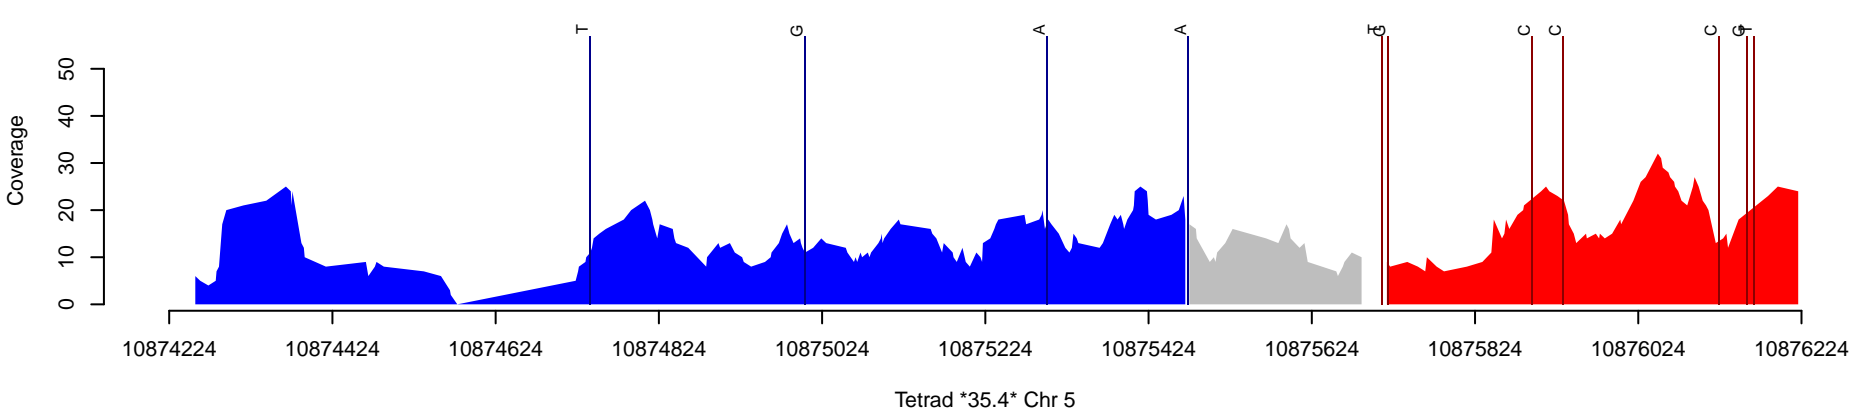

# ID59

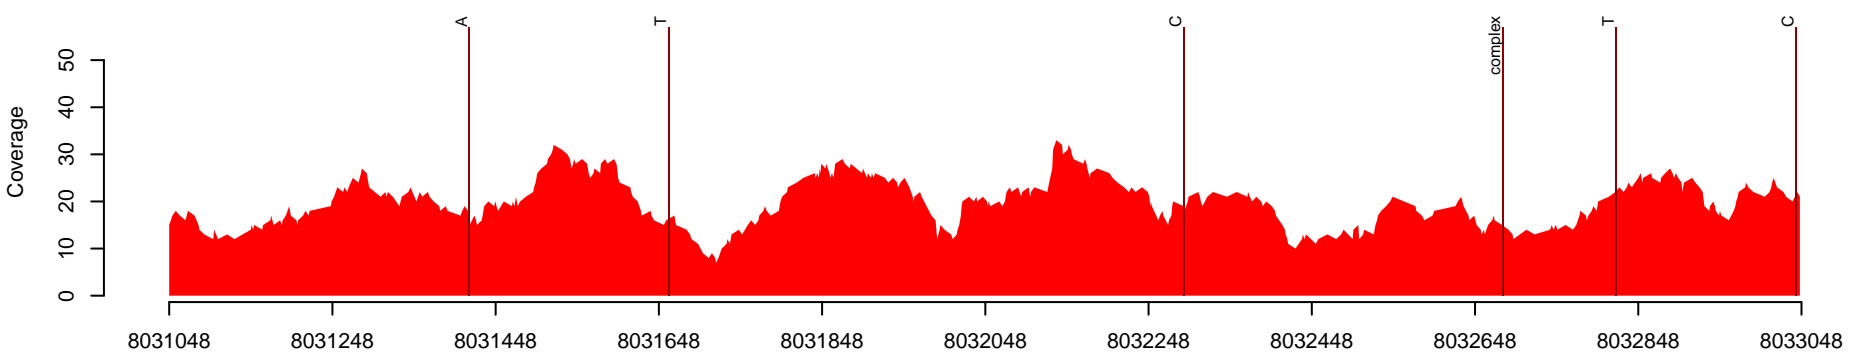

Col-0 Chr 5

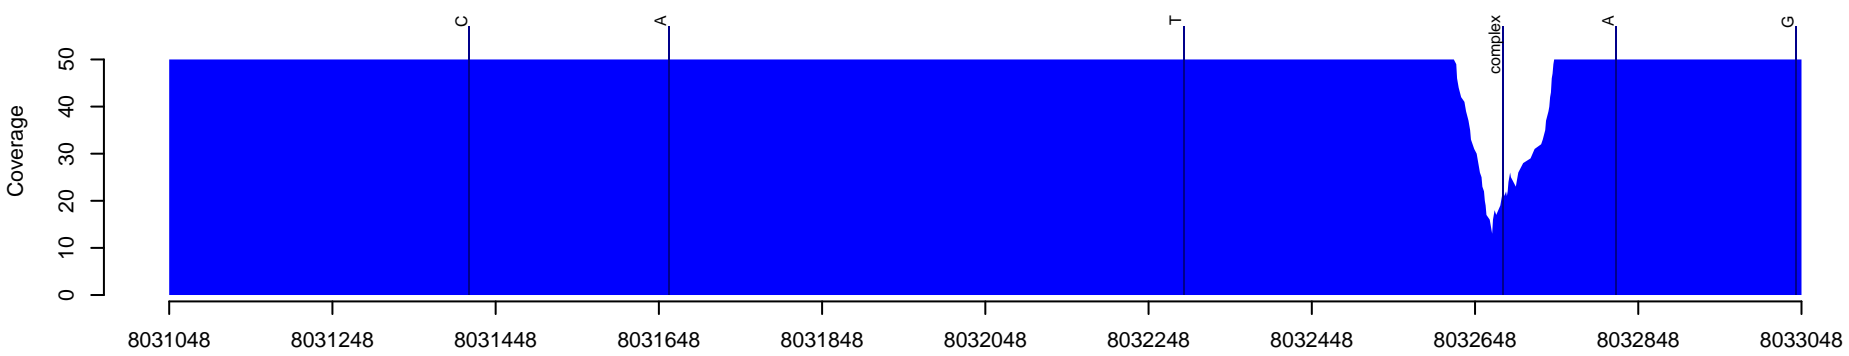

Ler Chr 5

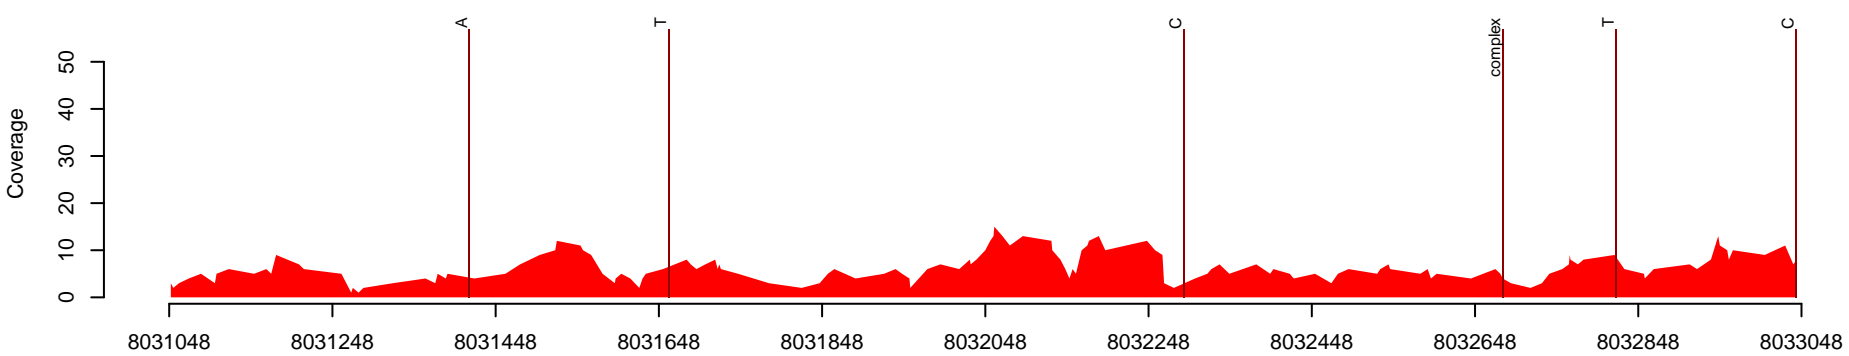

Tetrad 39.1 Chr 5

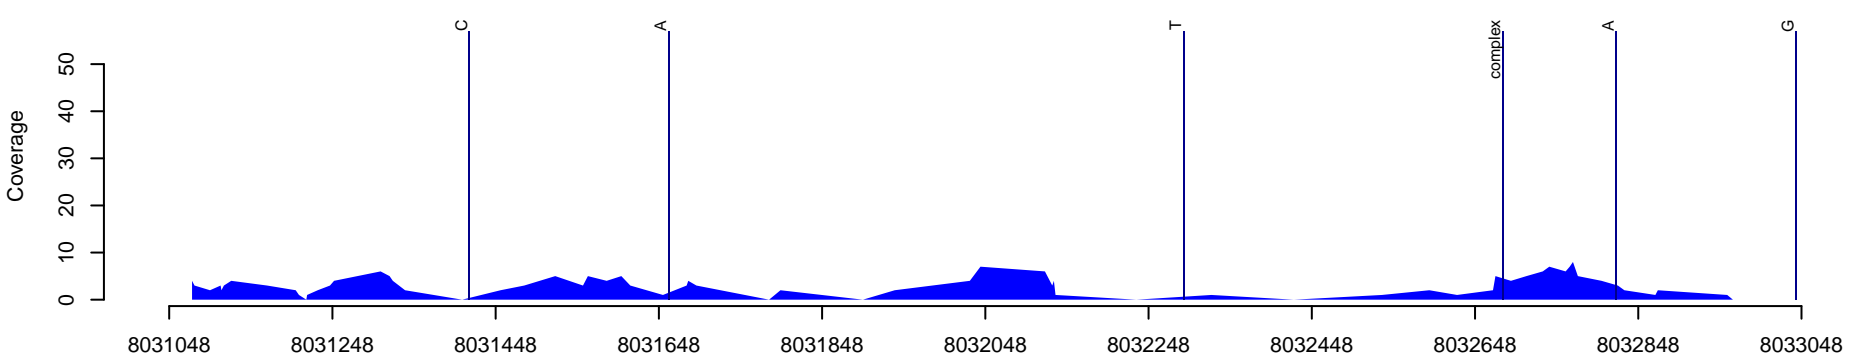

Tetrad 39.2 Chr 5

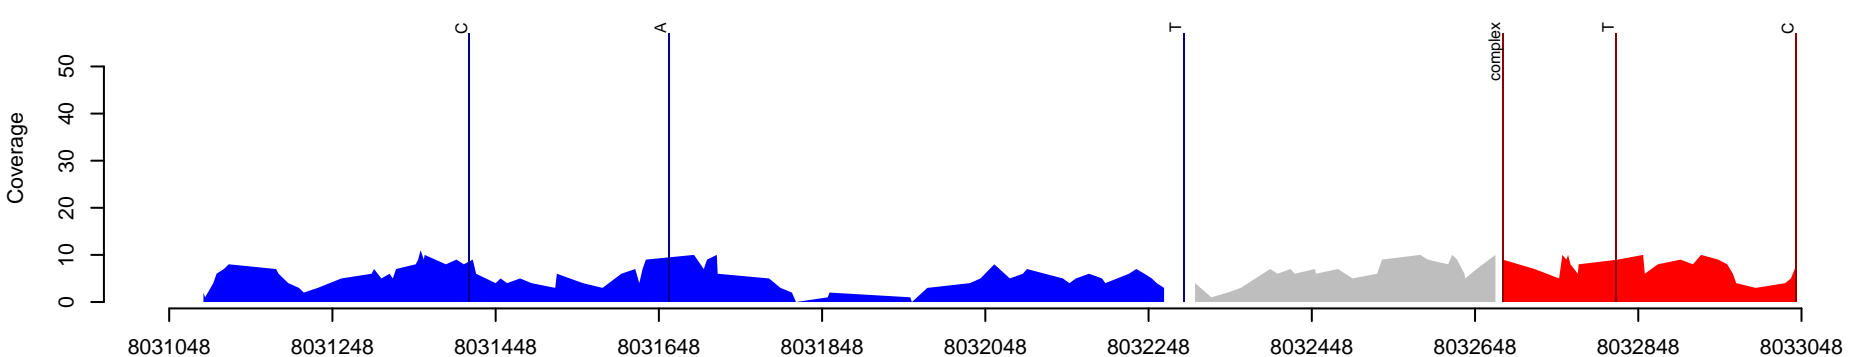

Tetrad \*39.3\* Chr 5

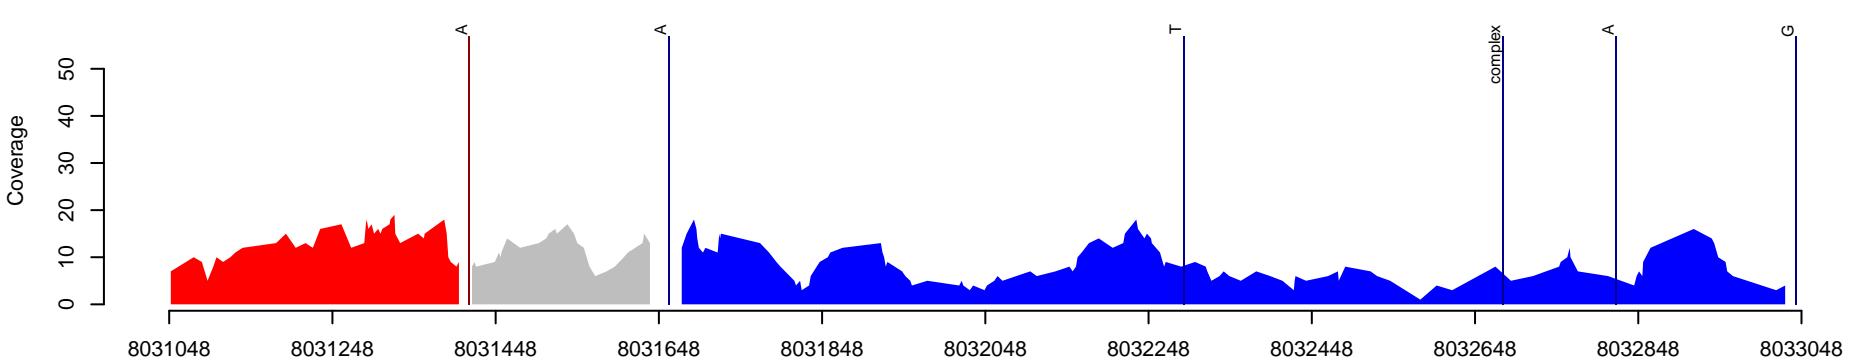

Tetrad \*39.4\* Chr 5

# ID60

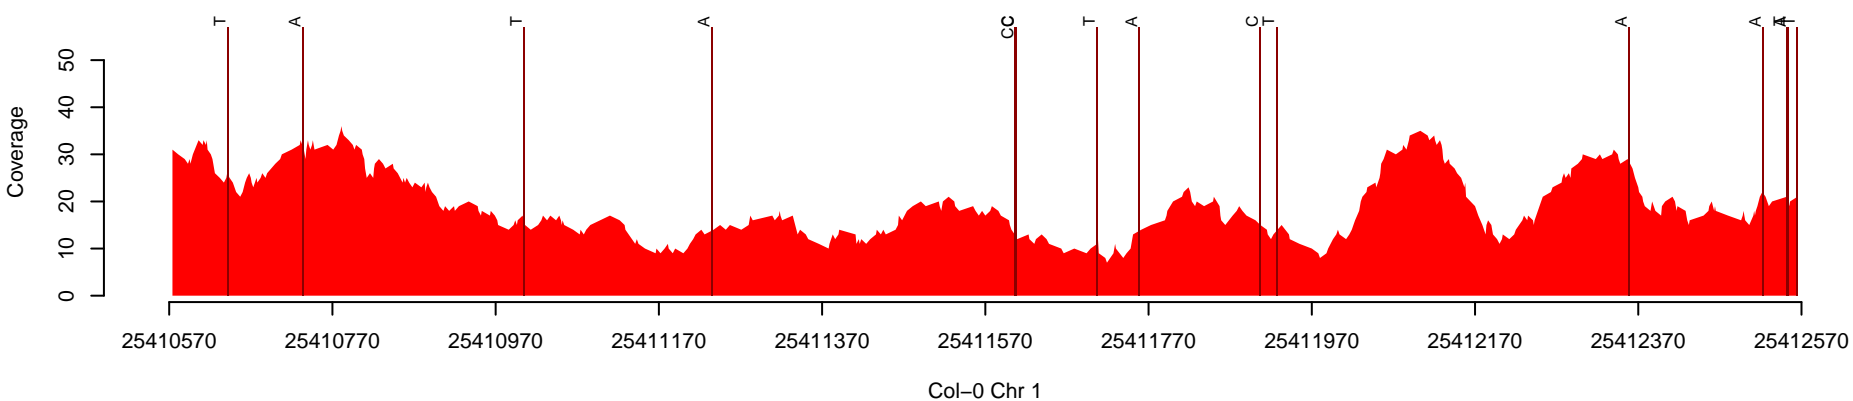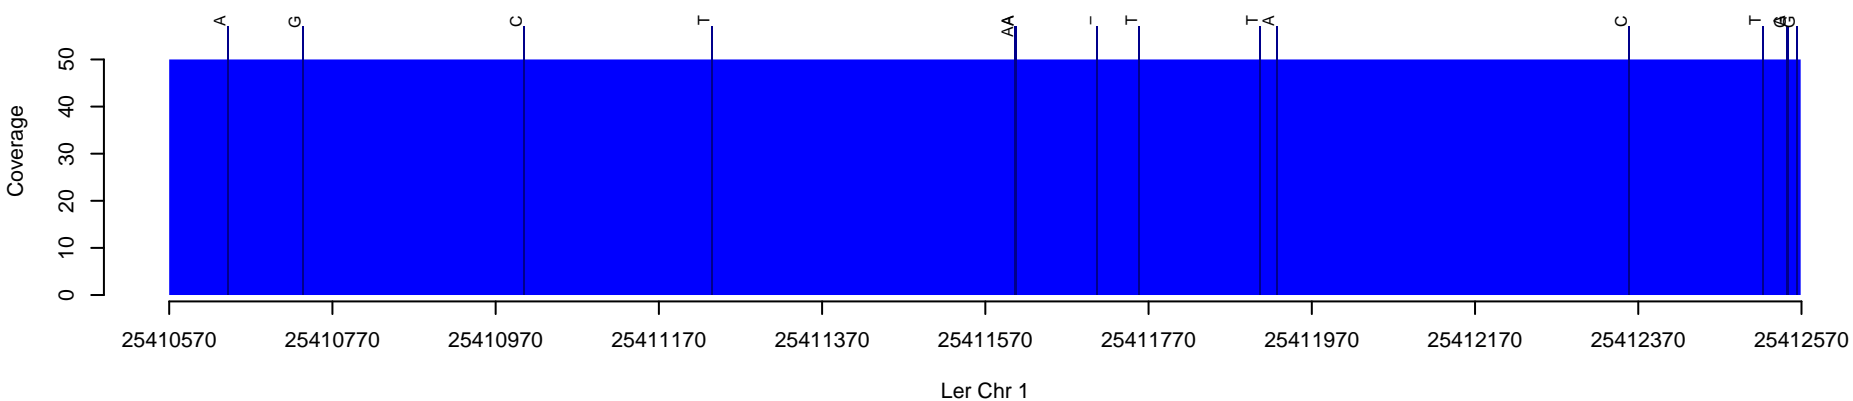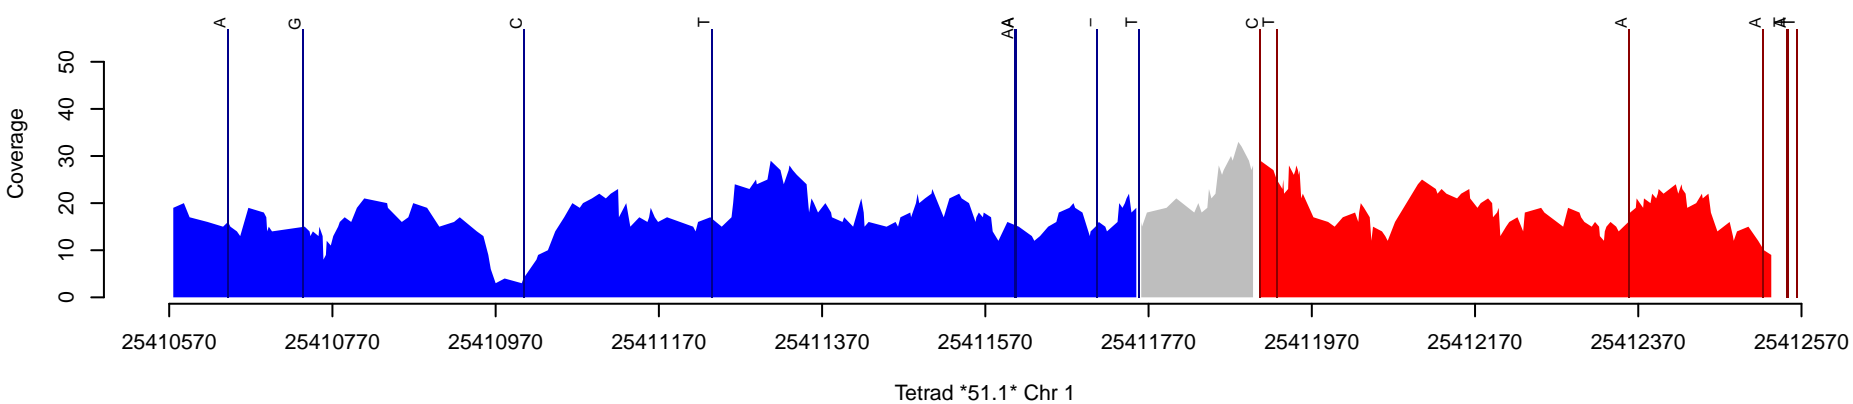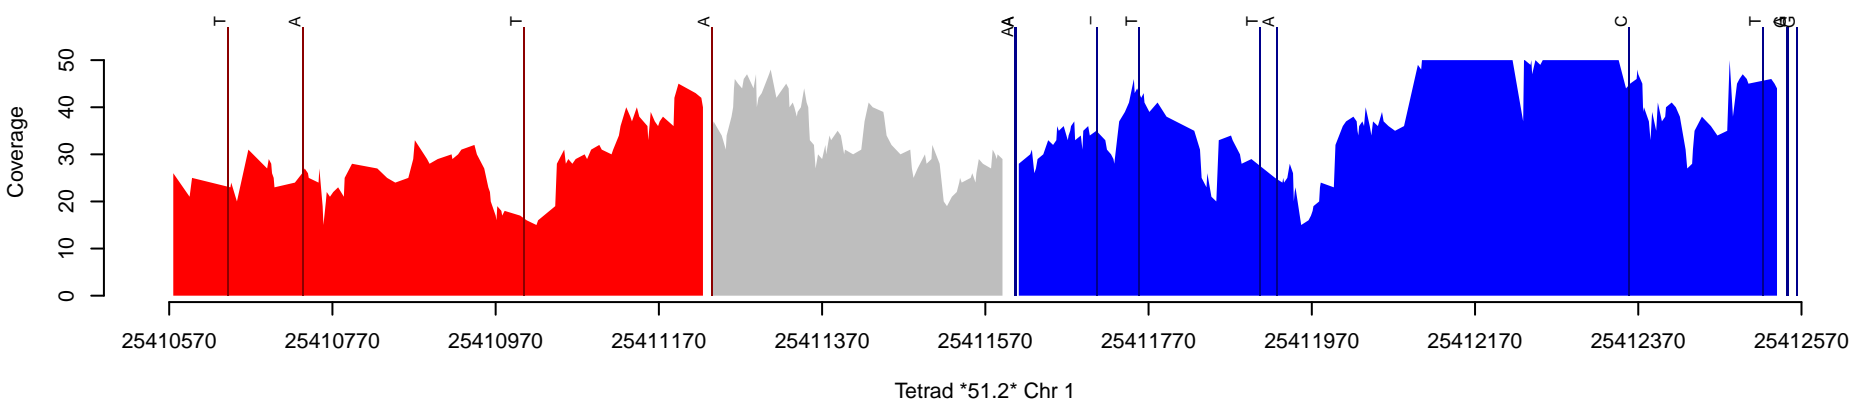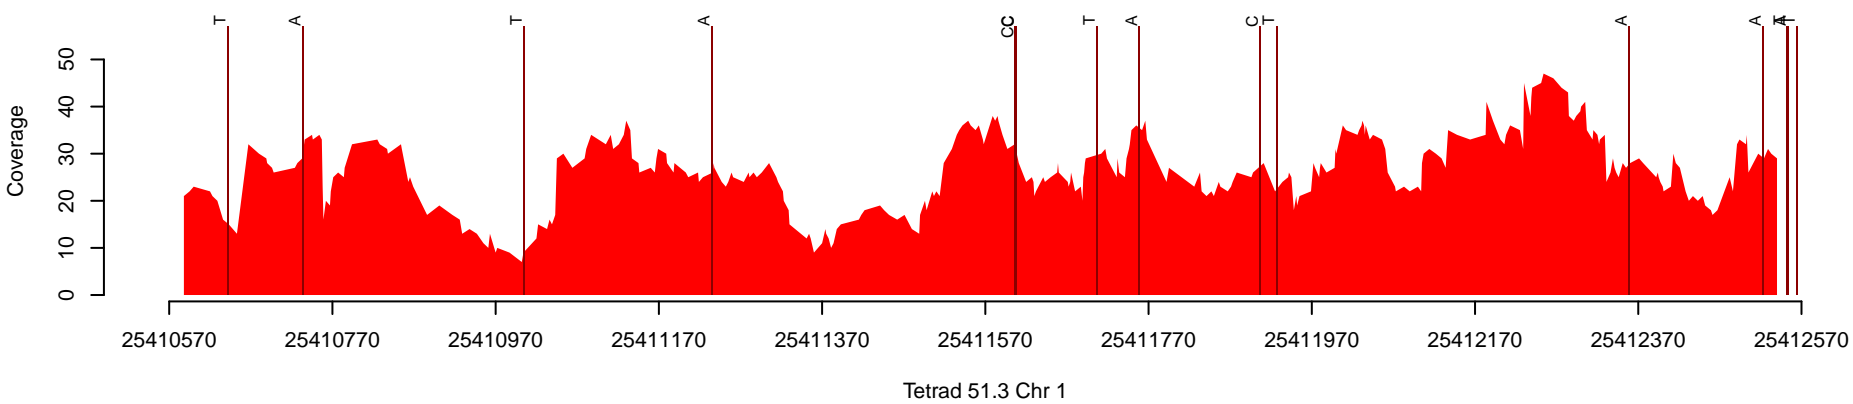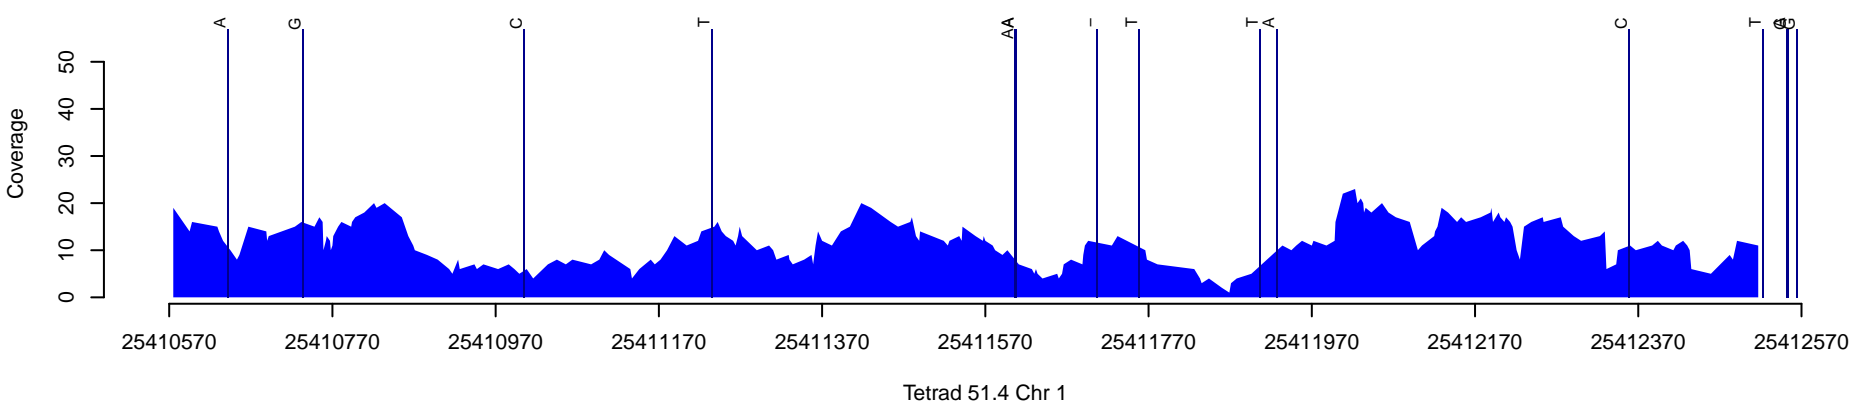

# ID61

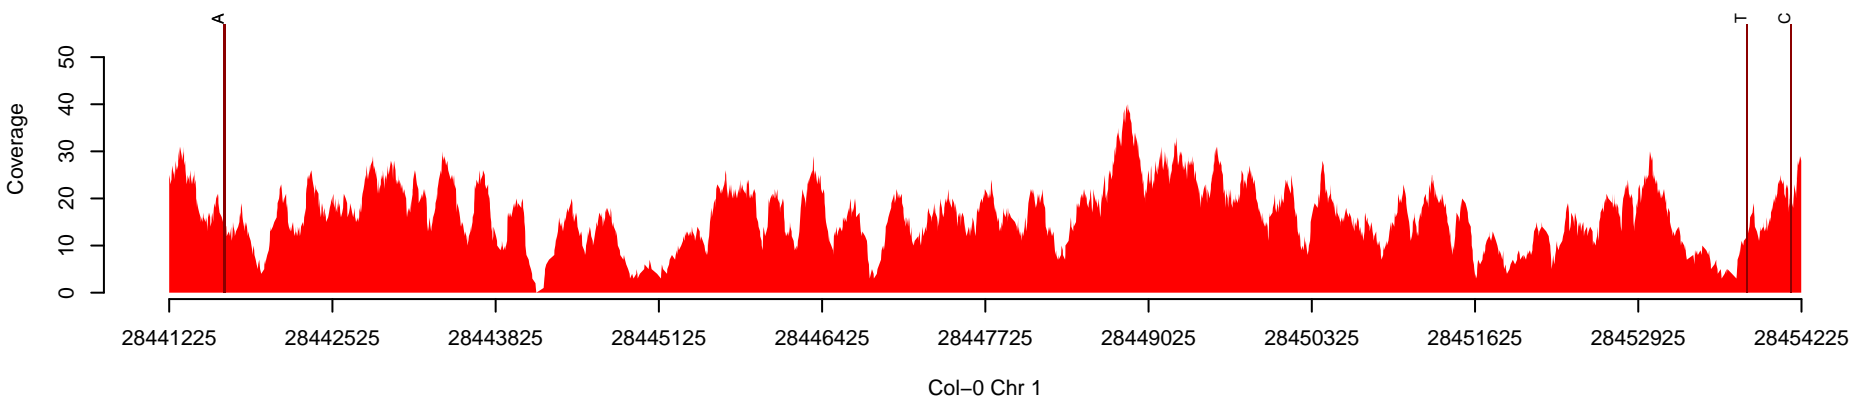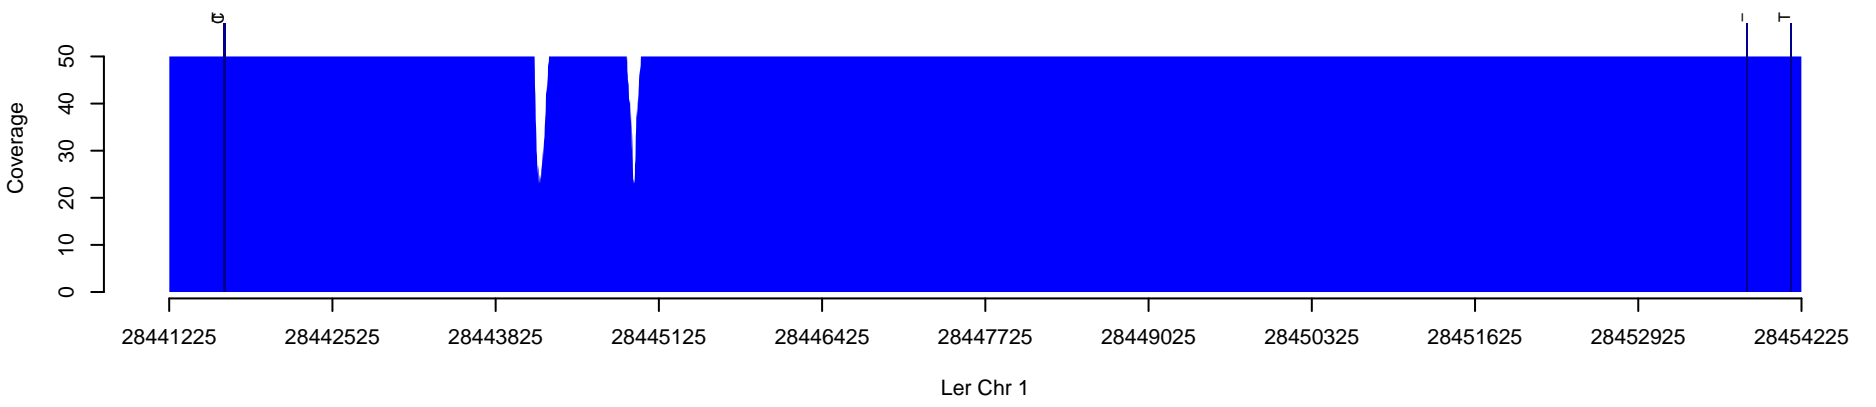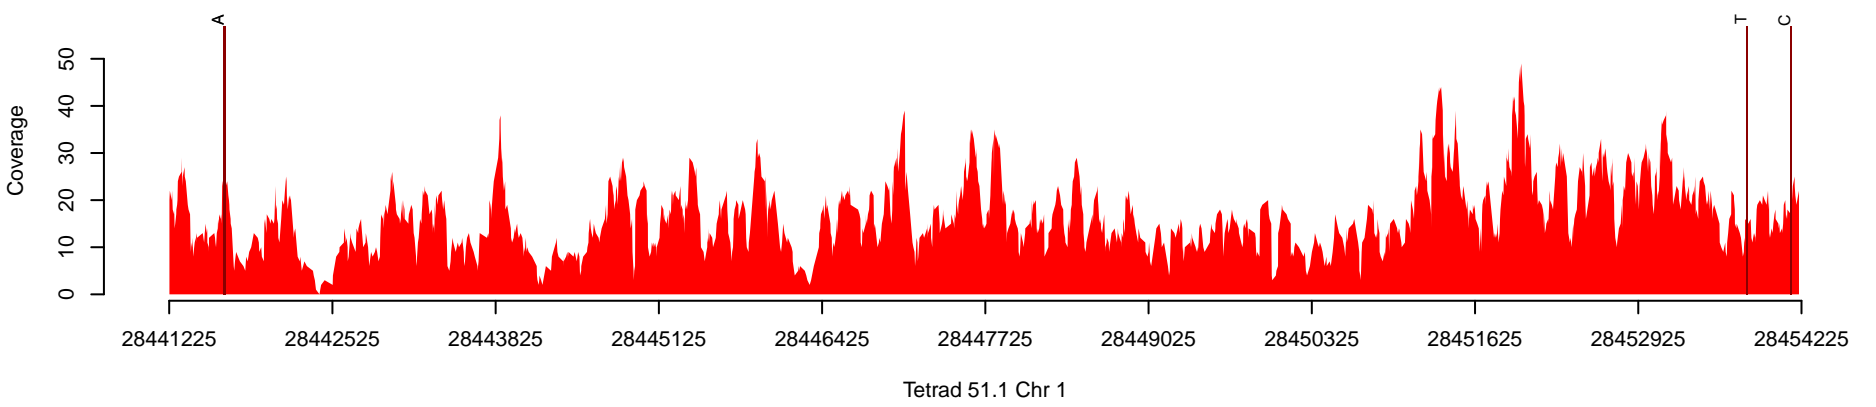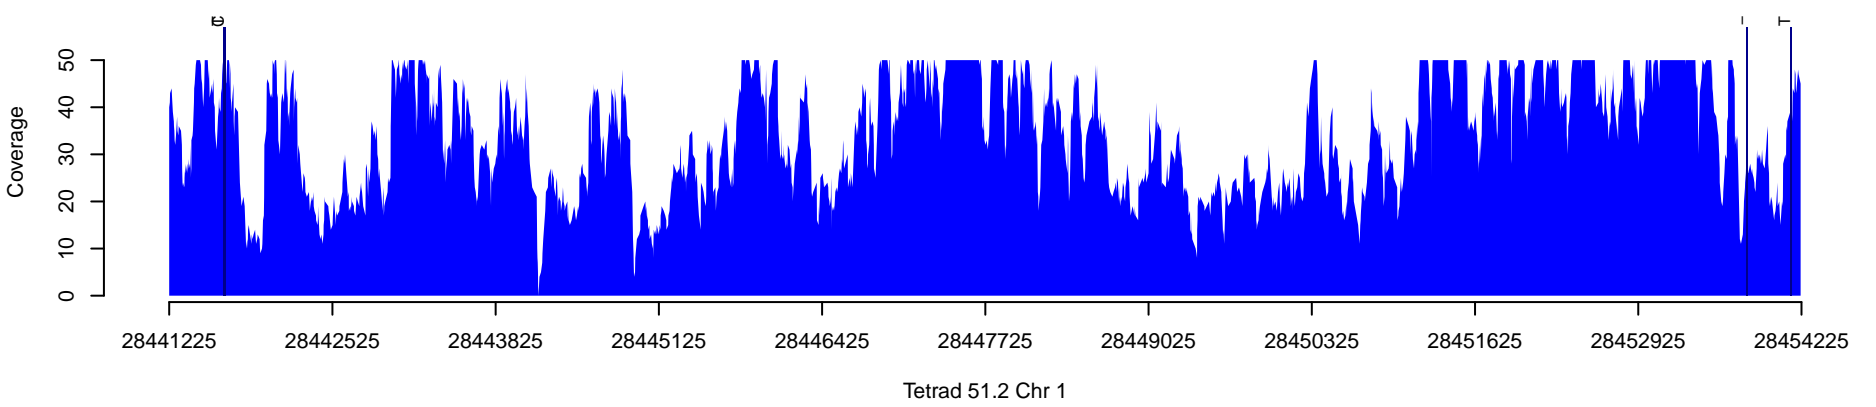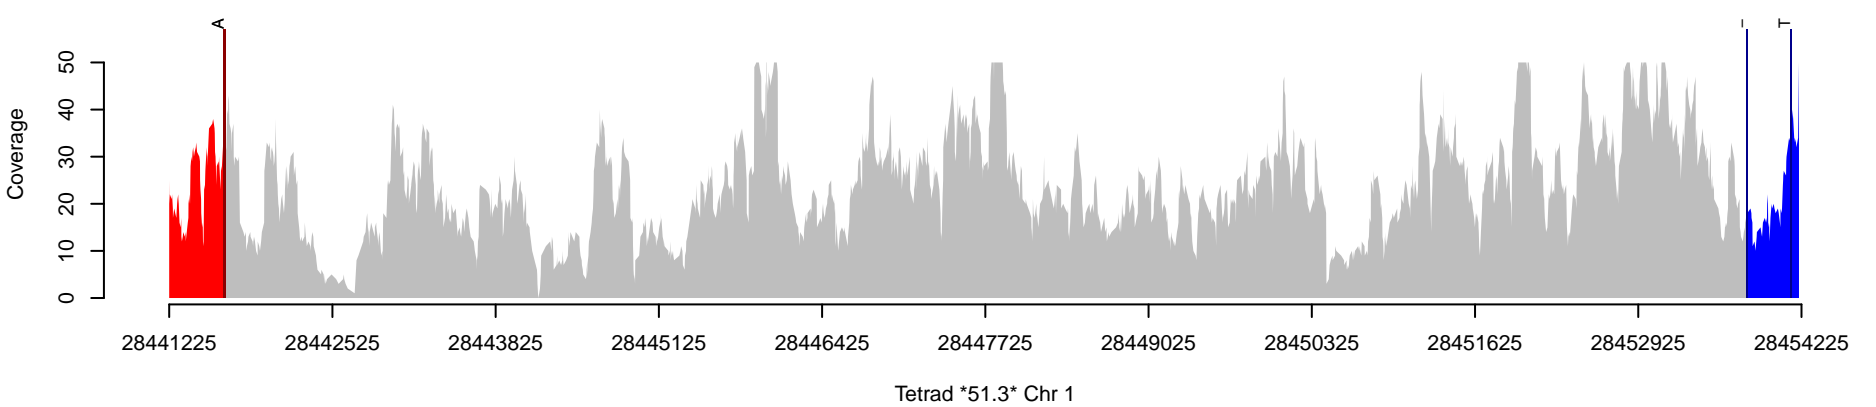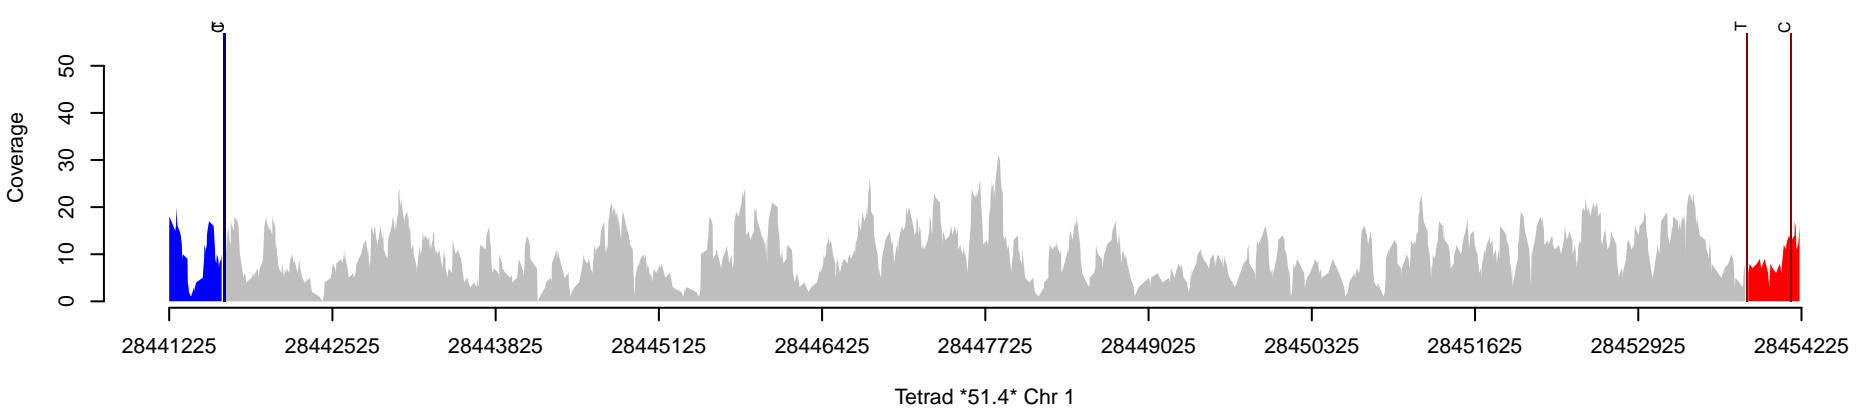

# ID62

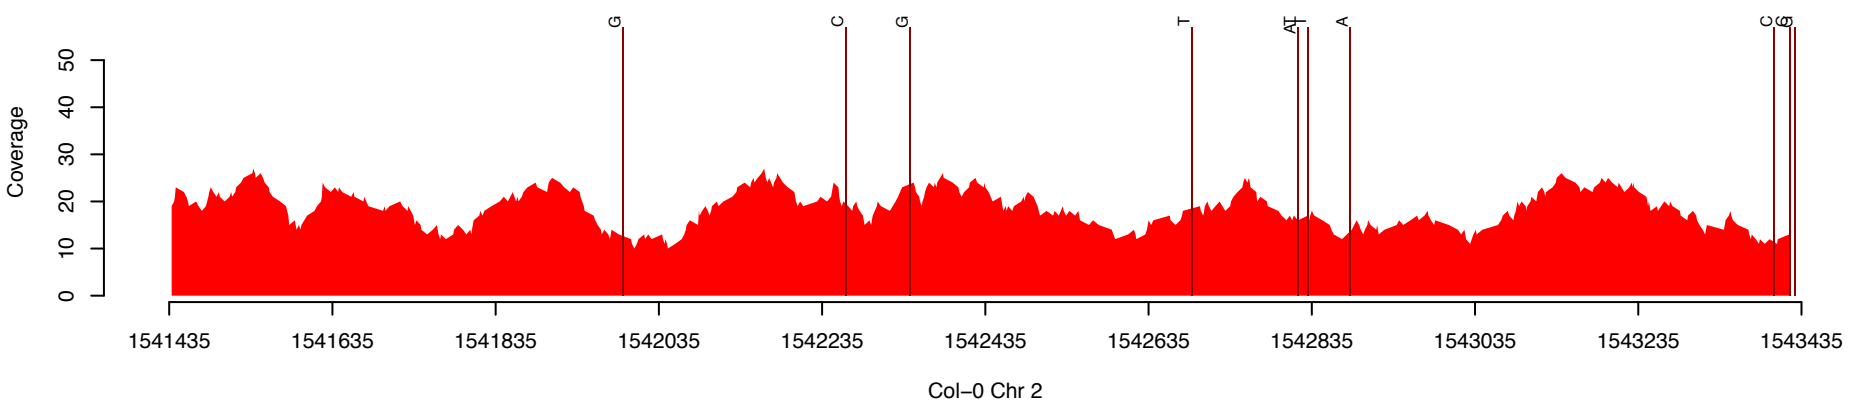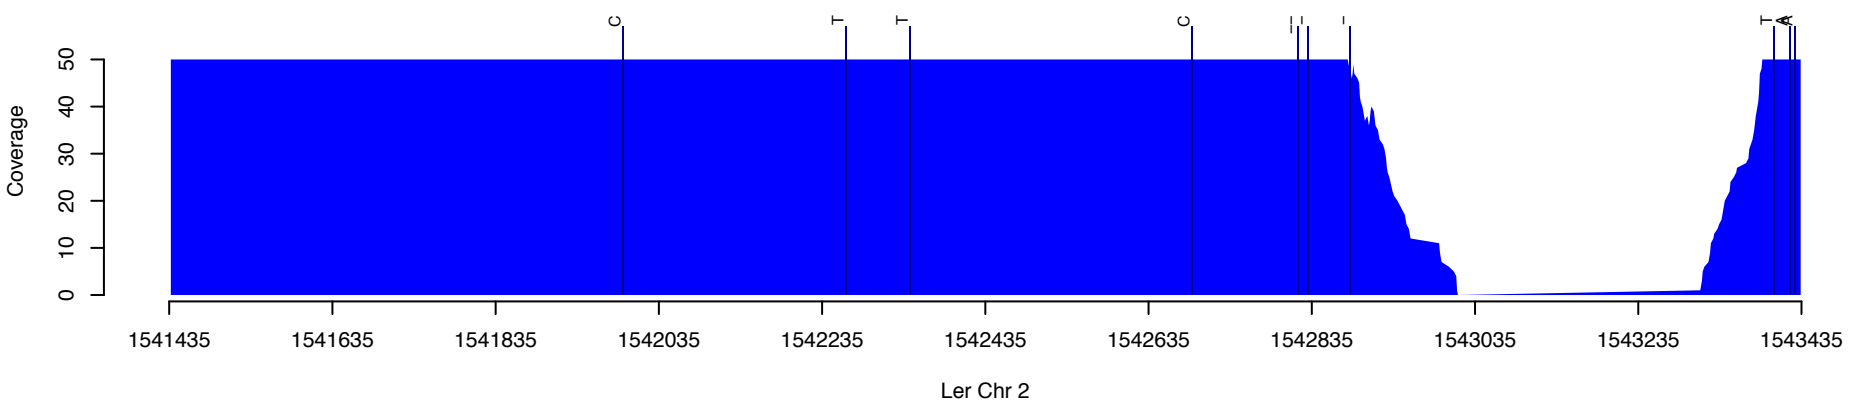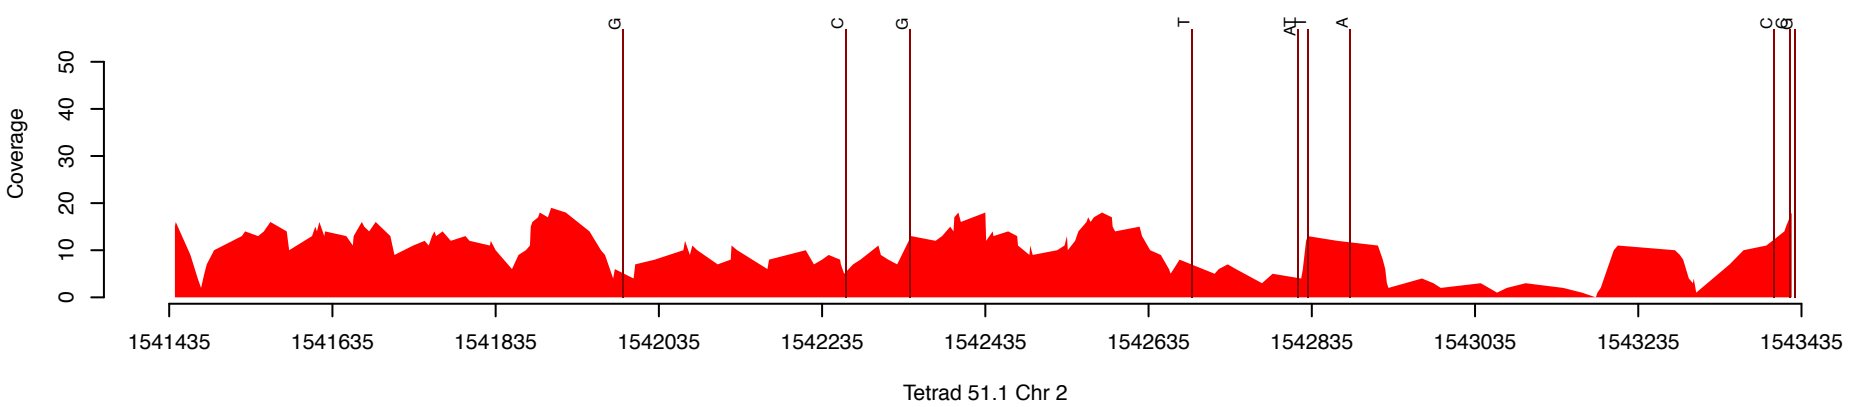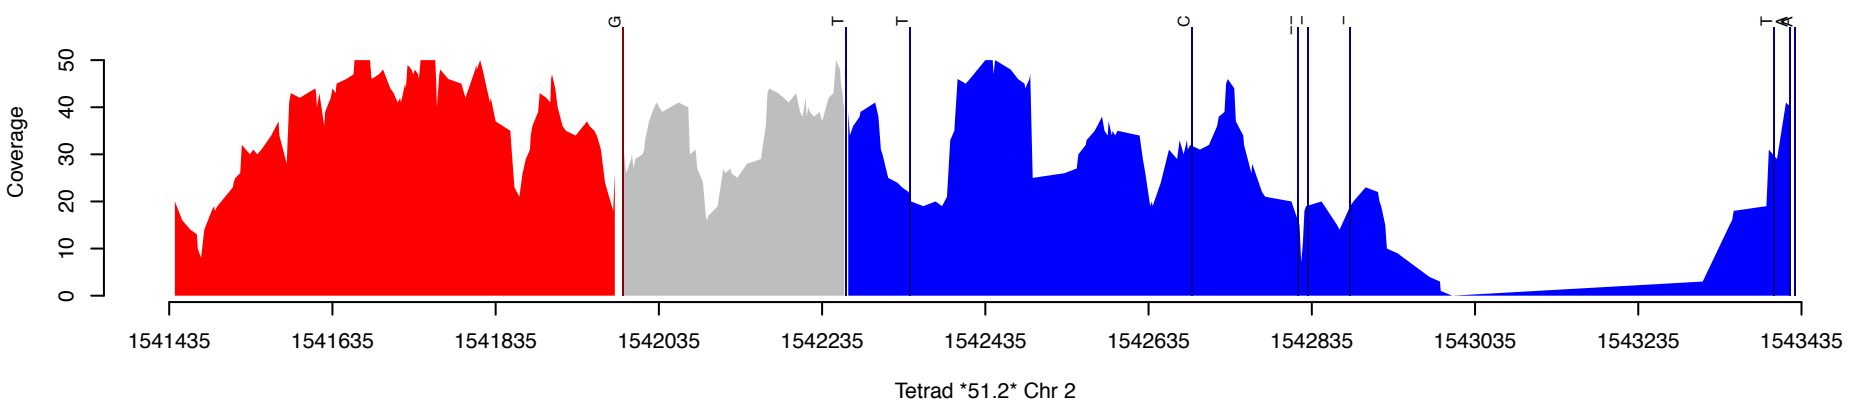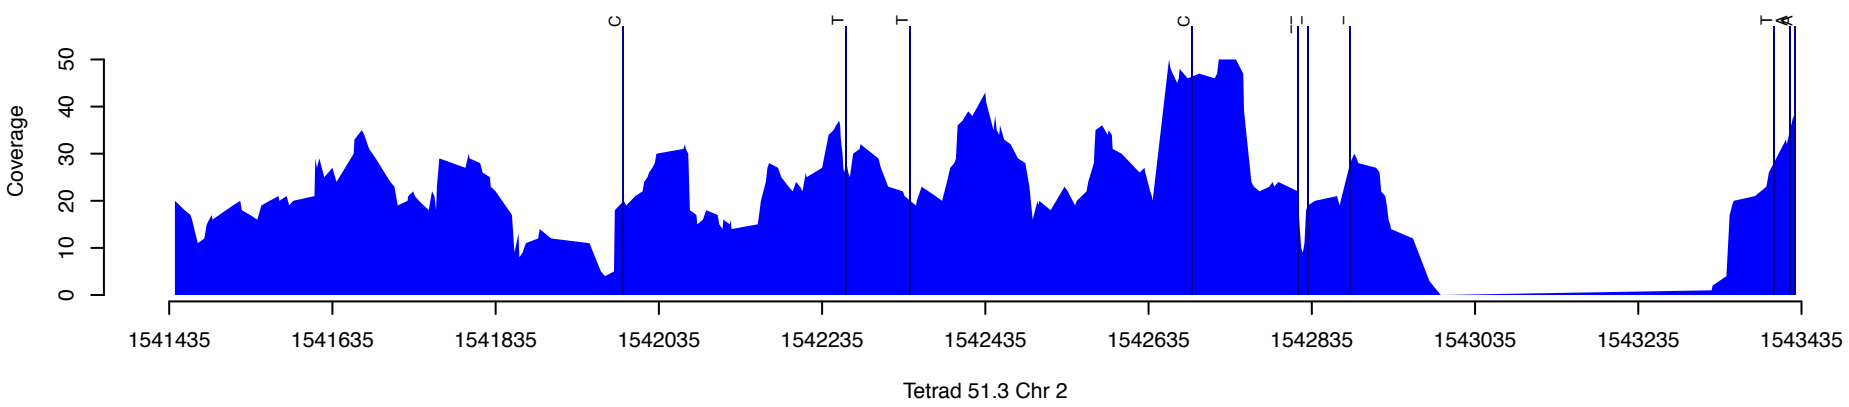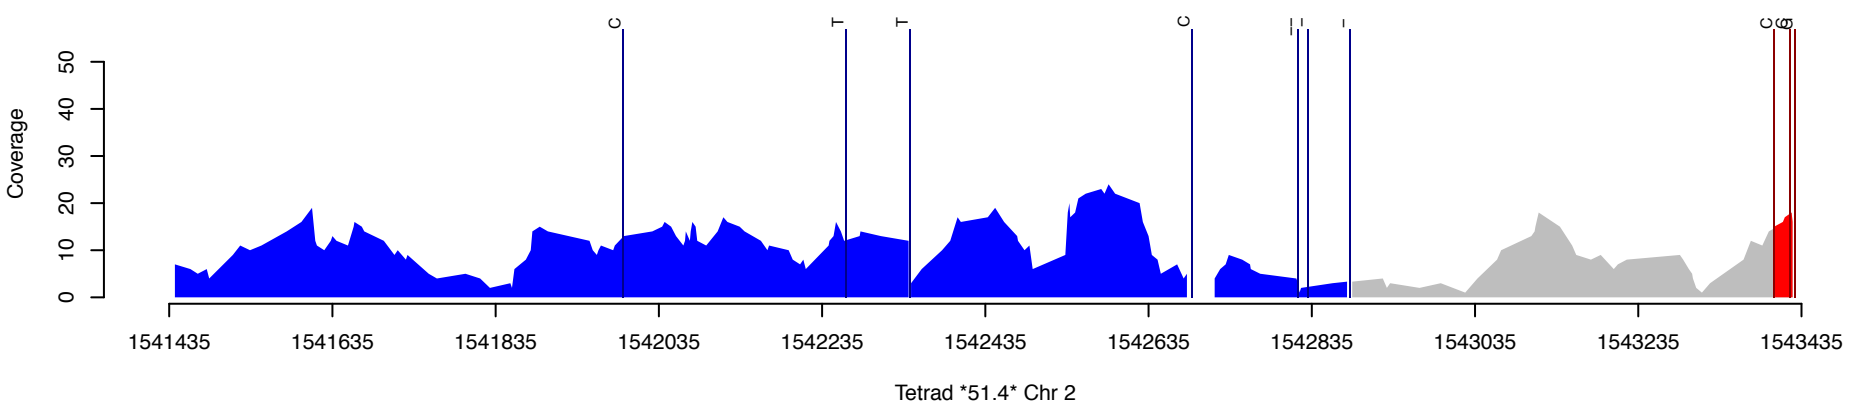

# ID63

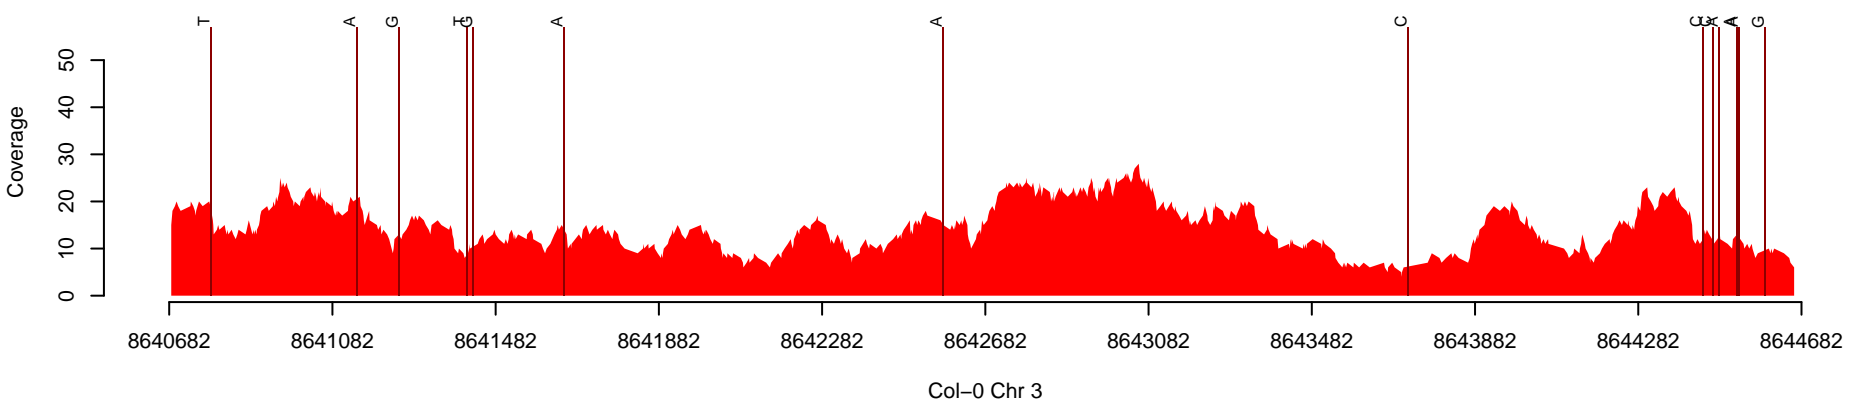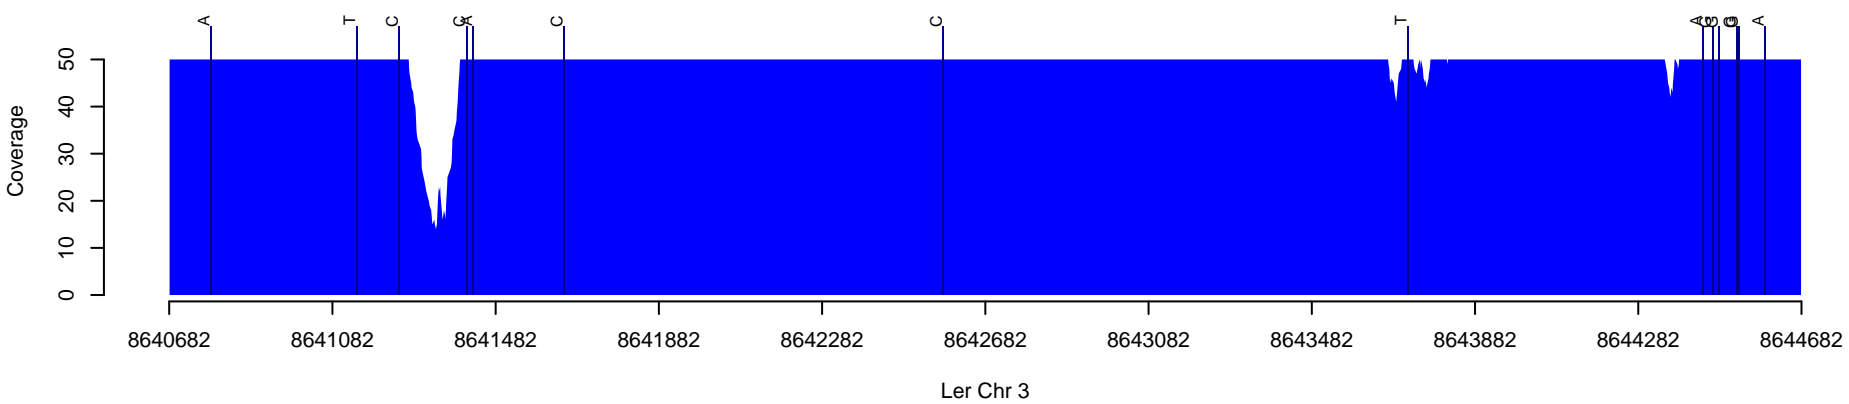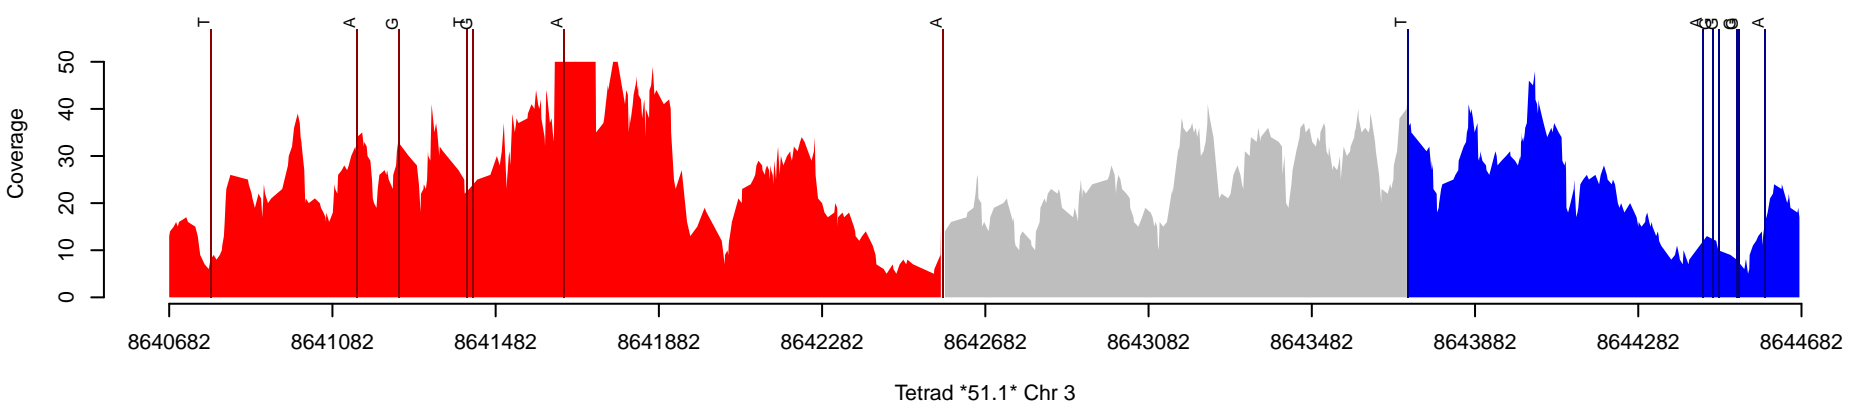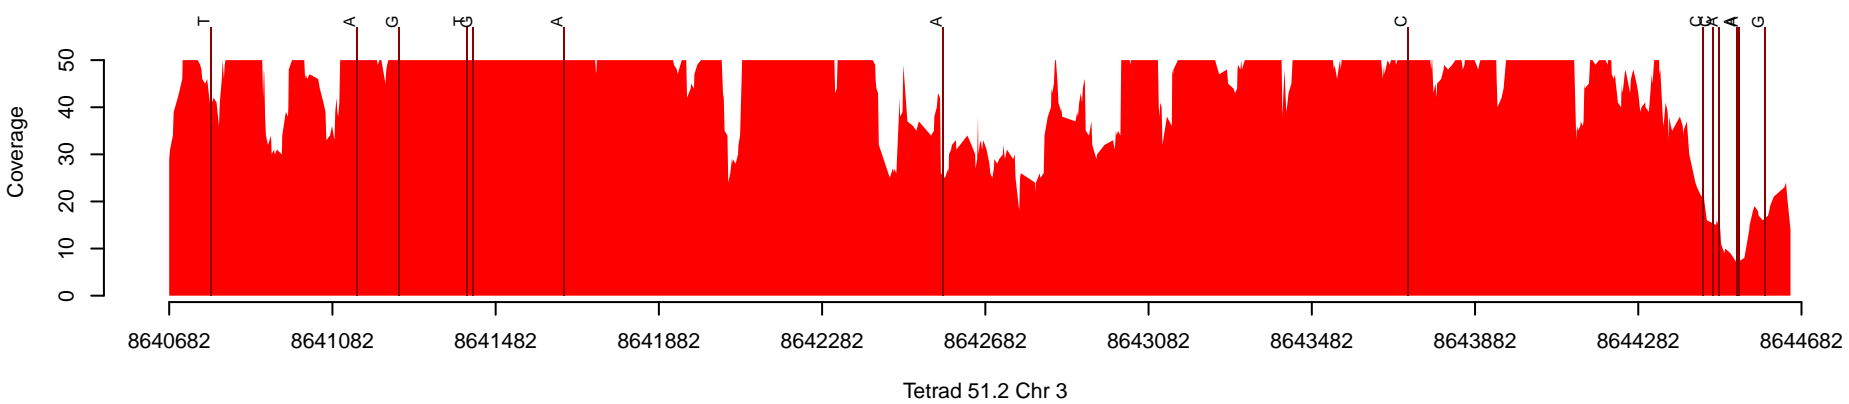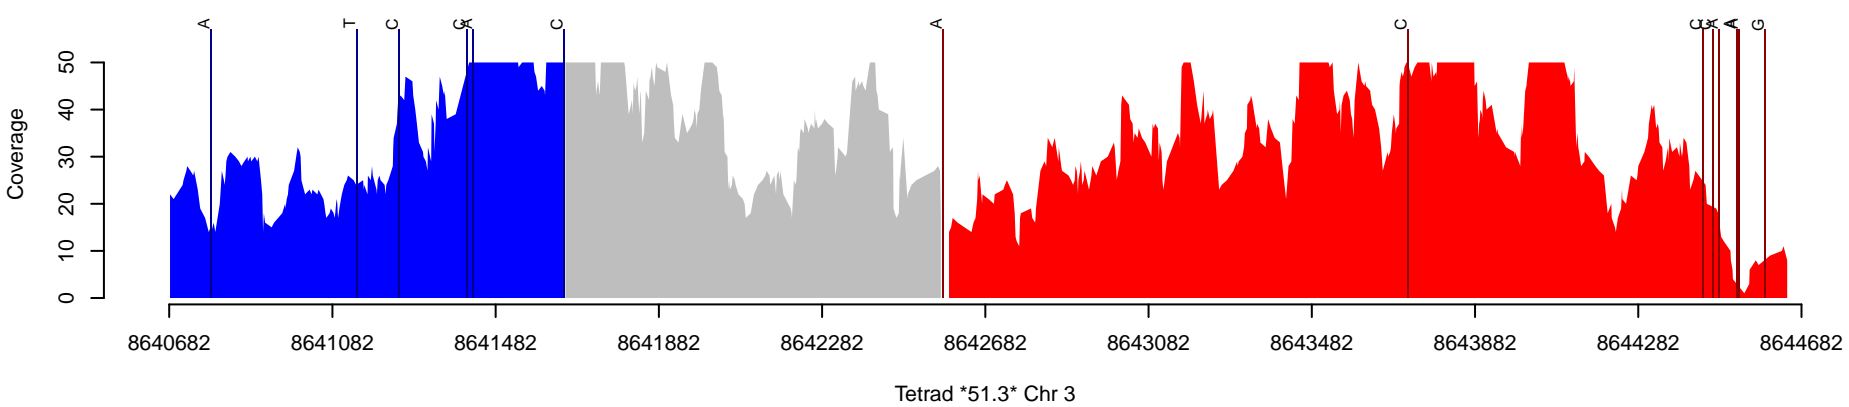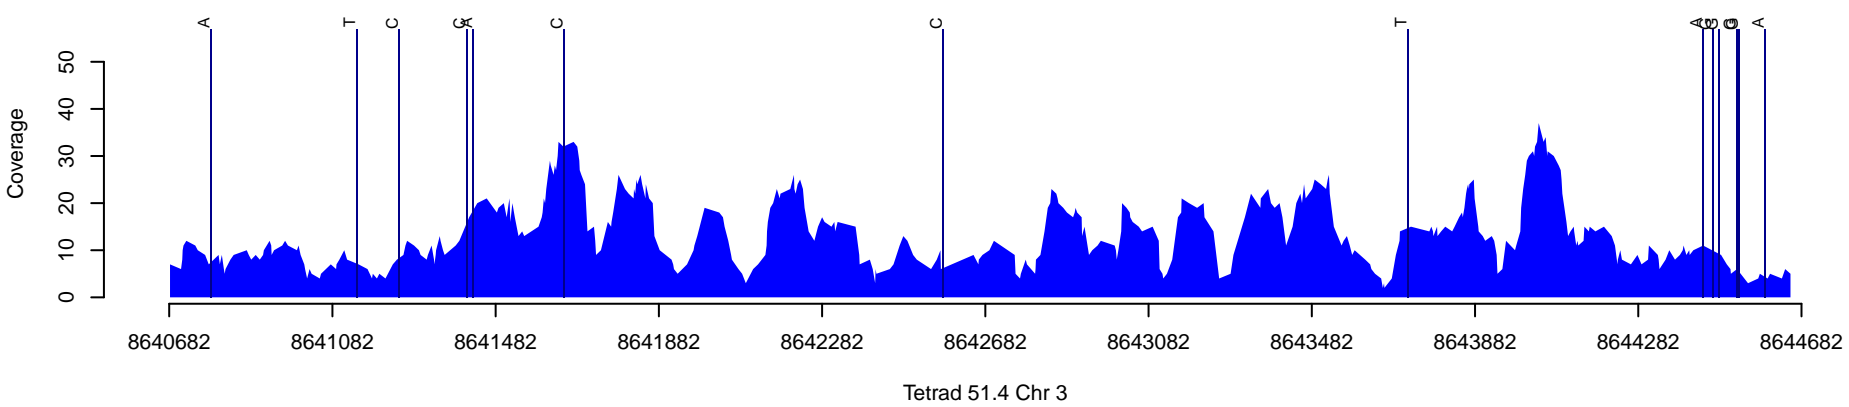

# ID64

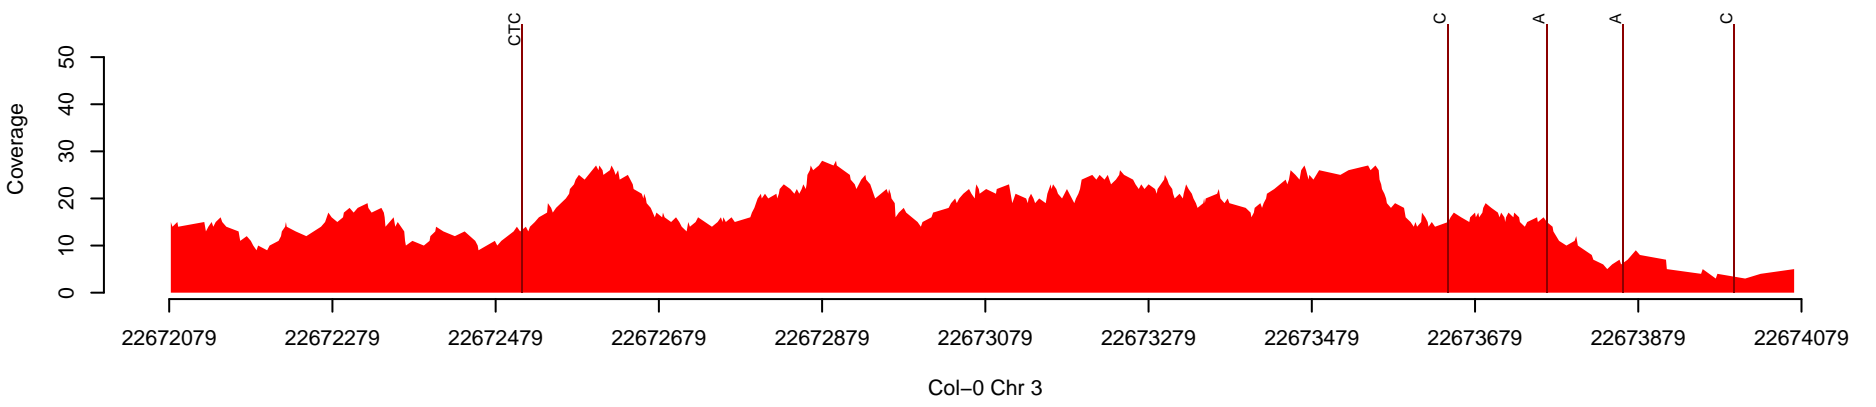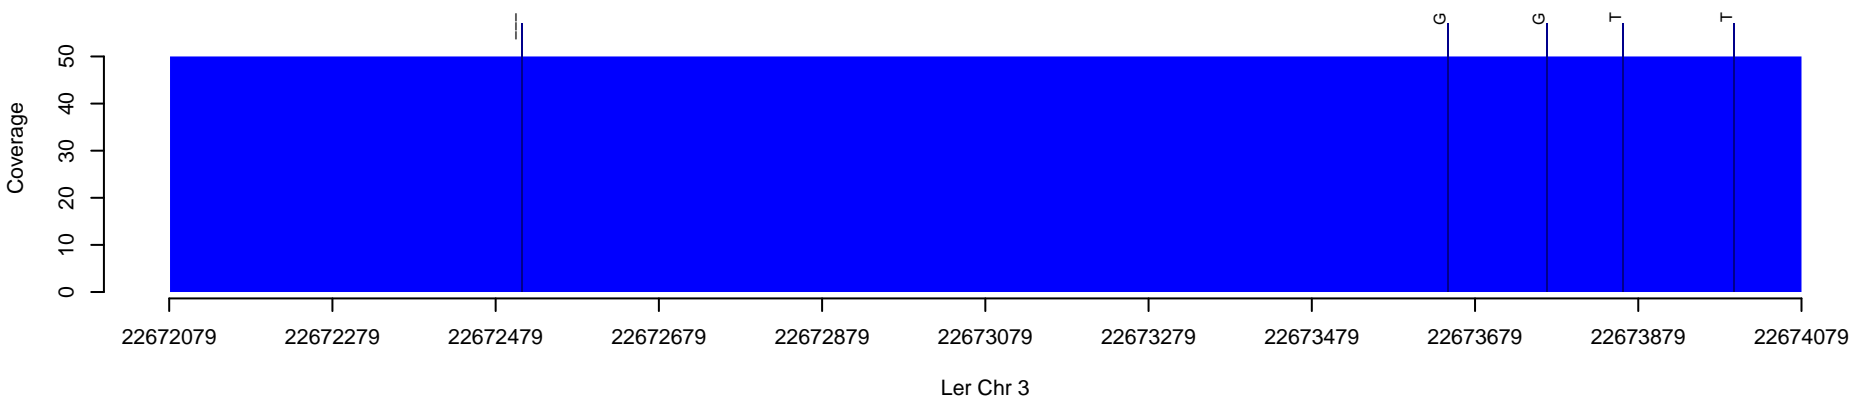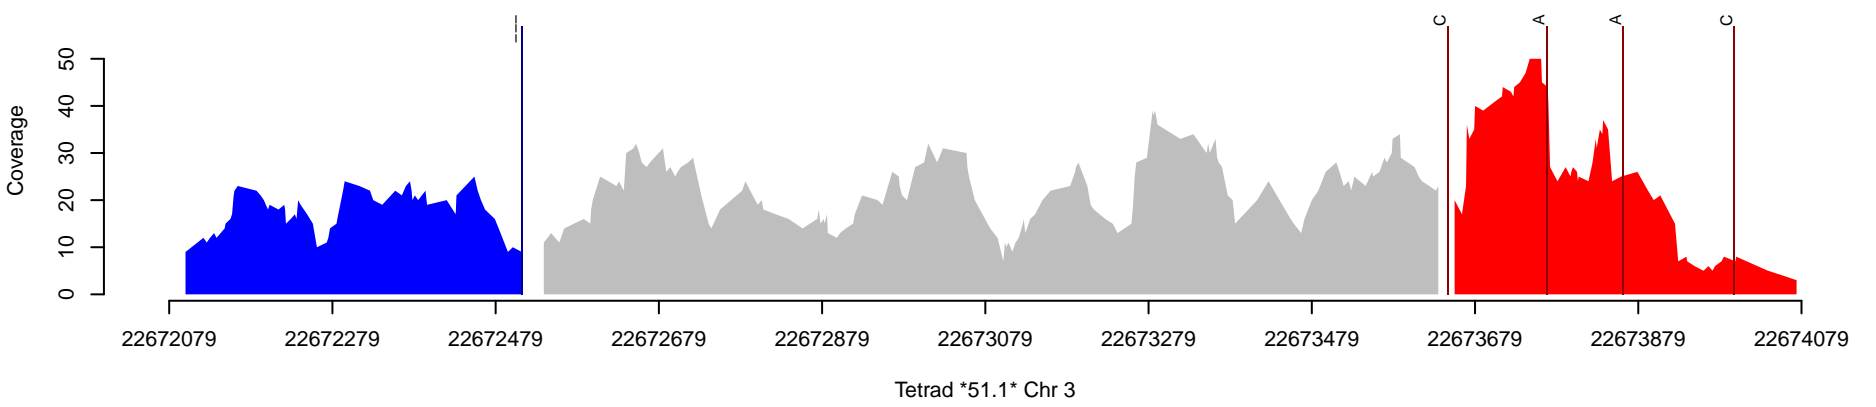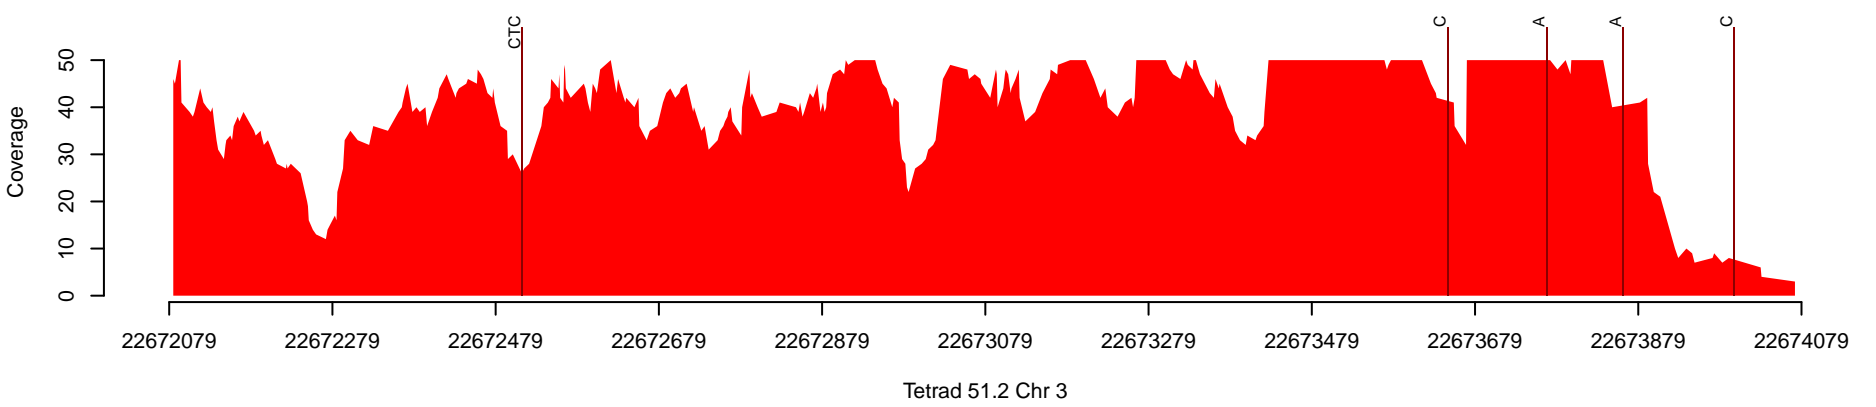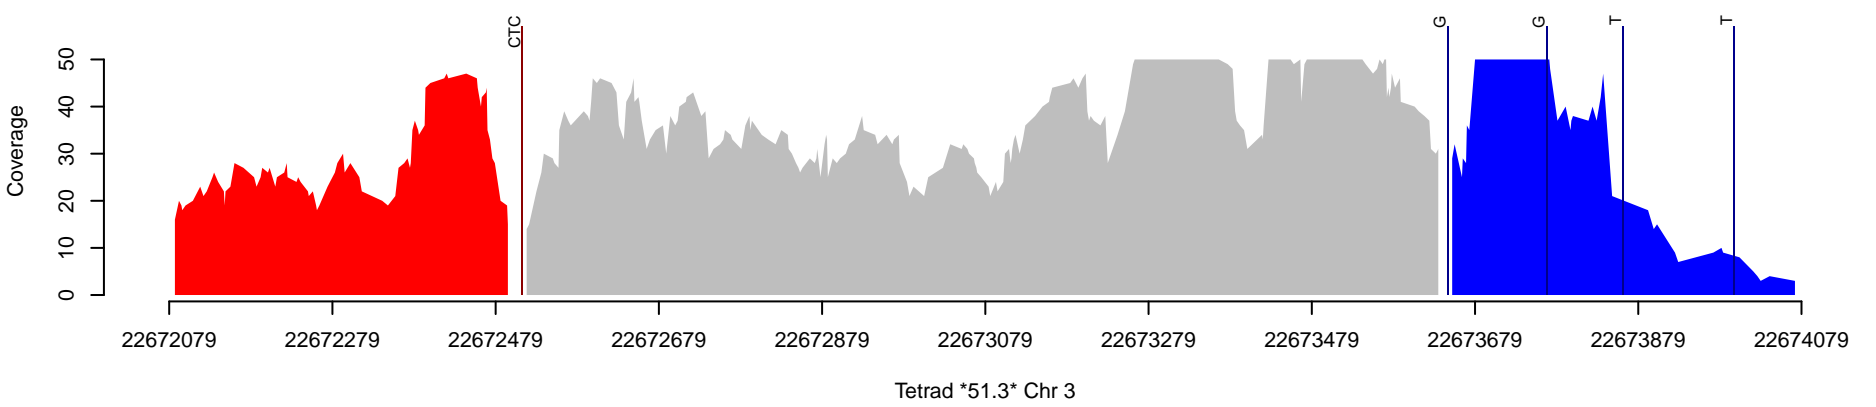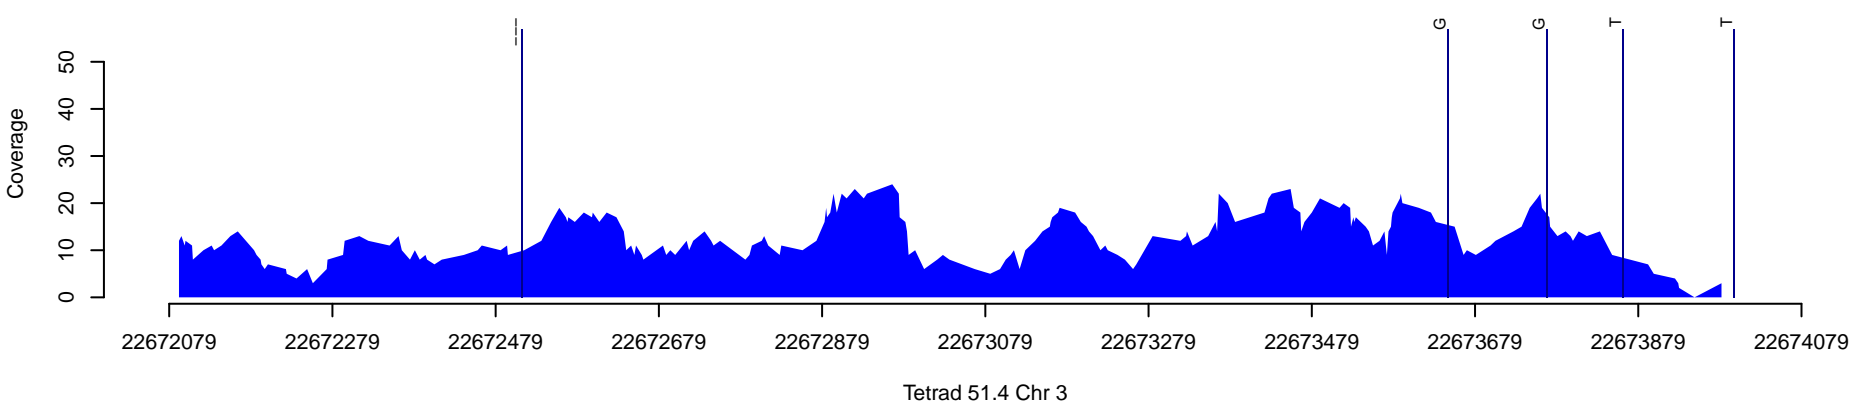



# ID65

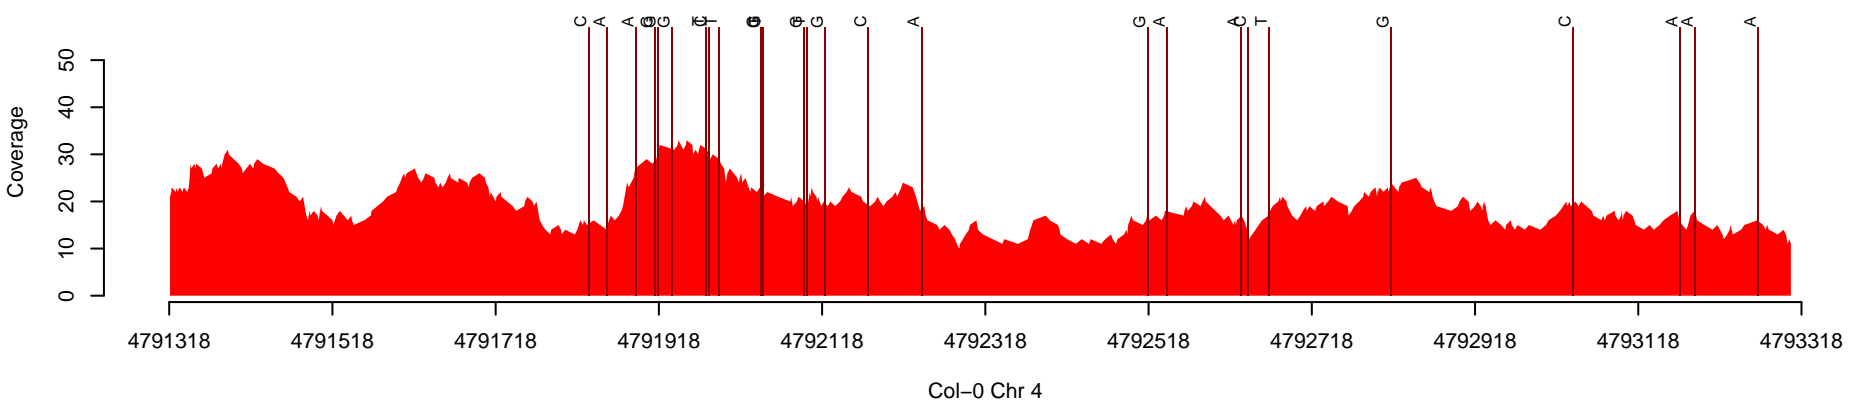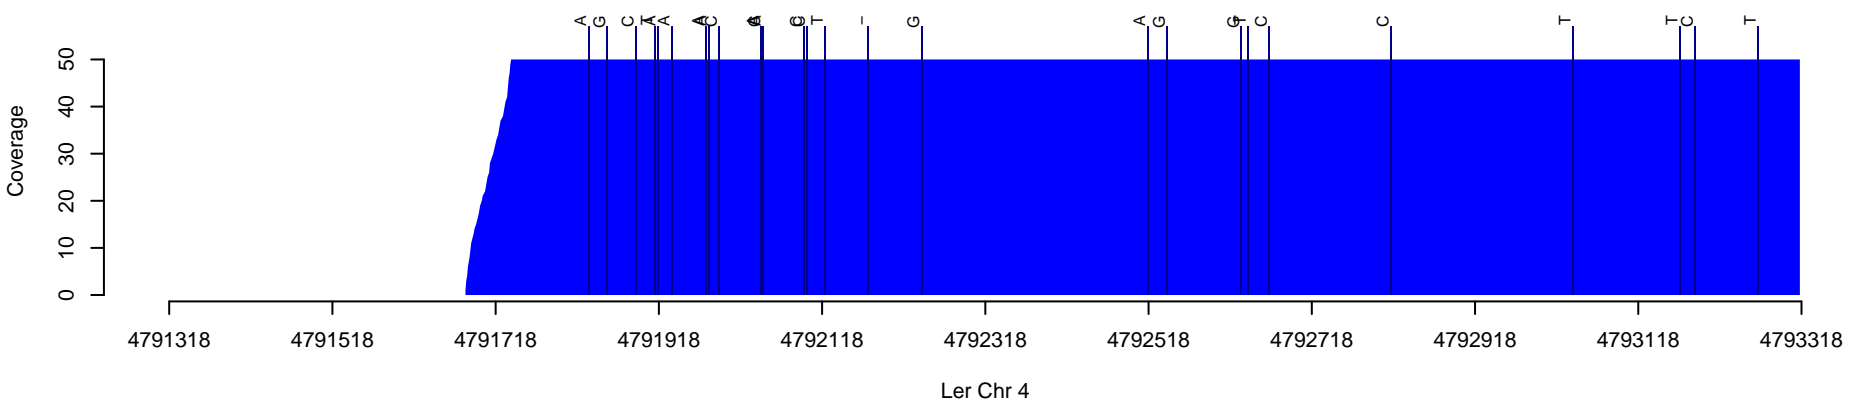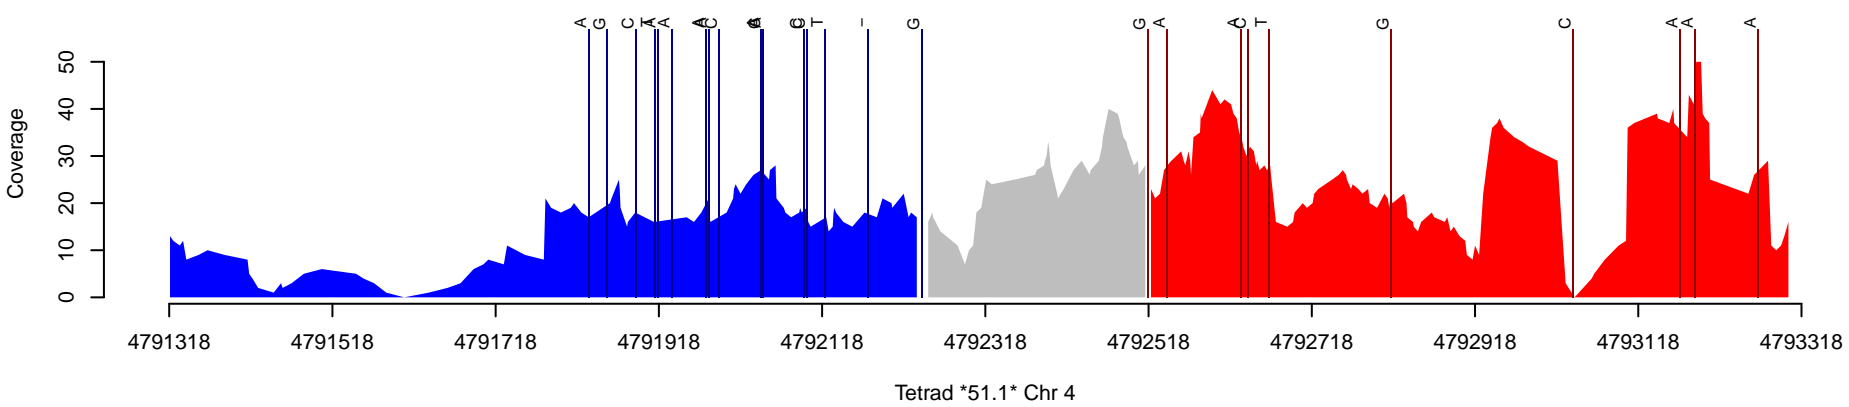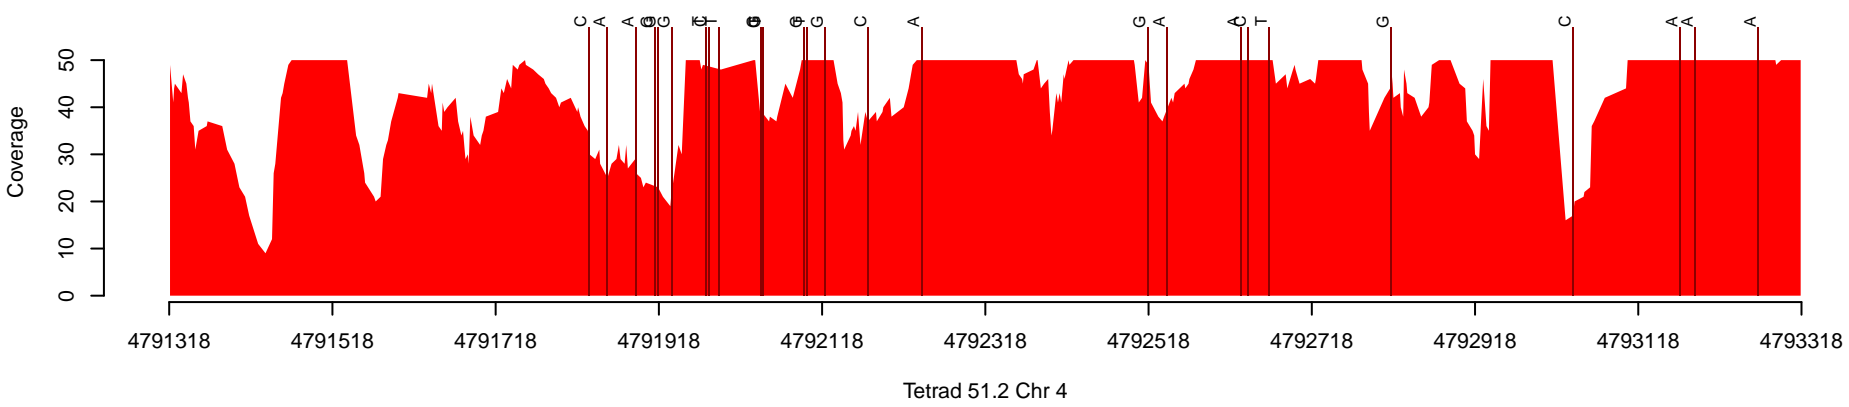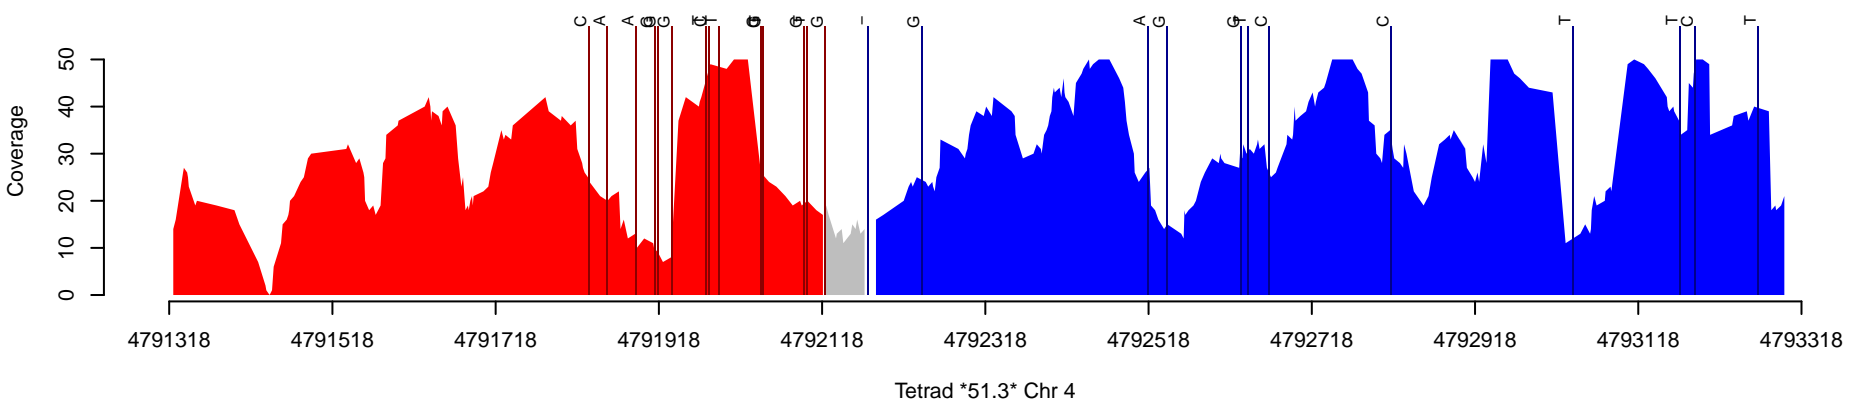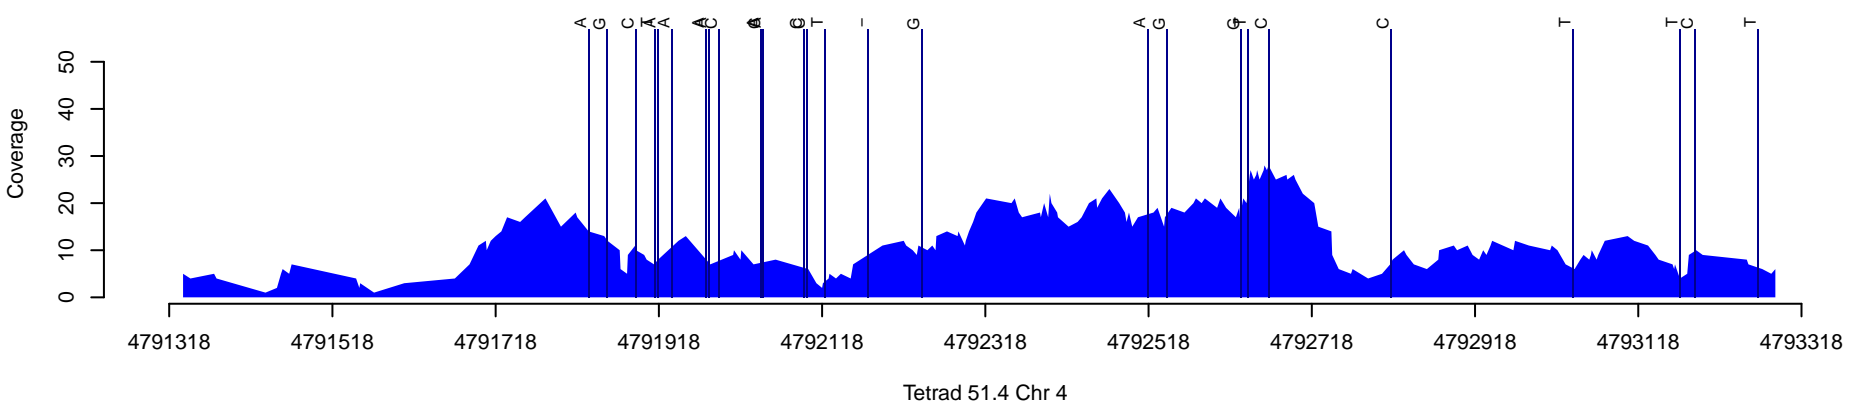

# ID66

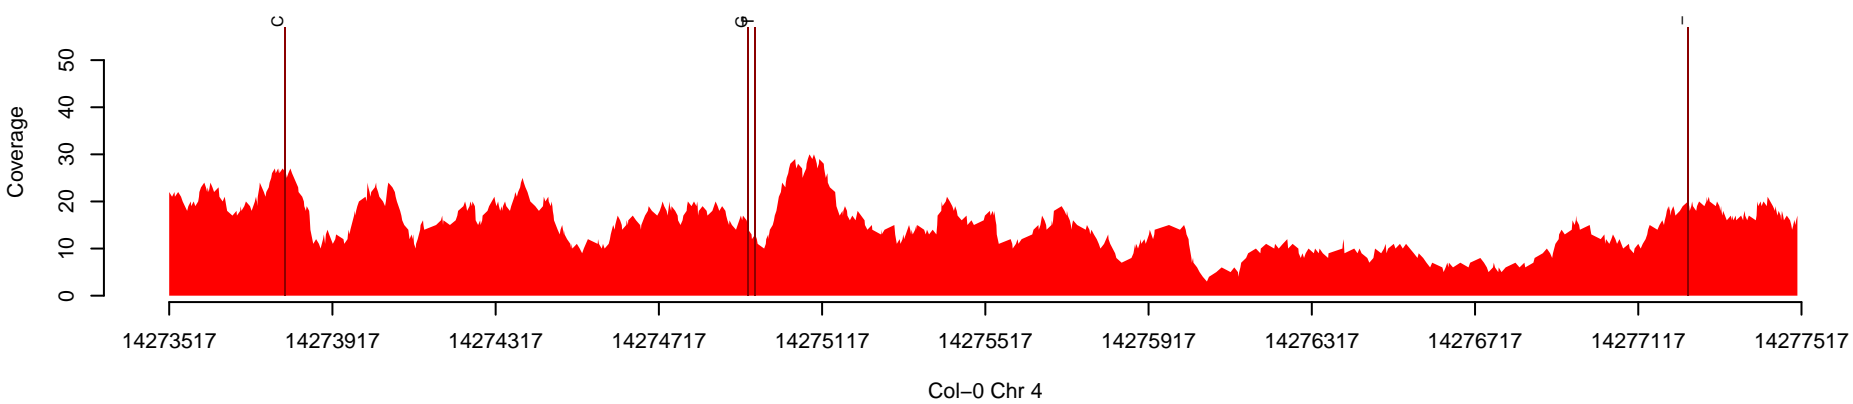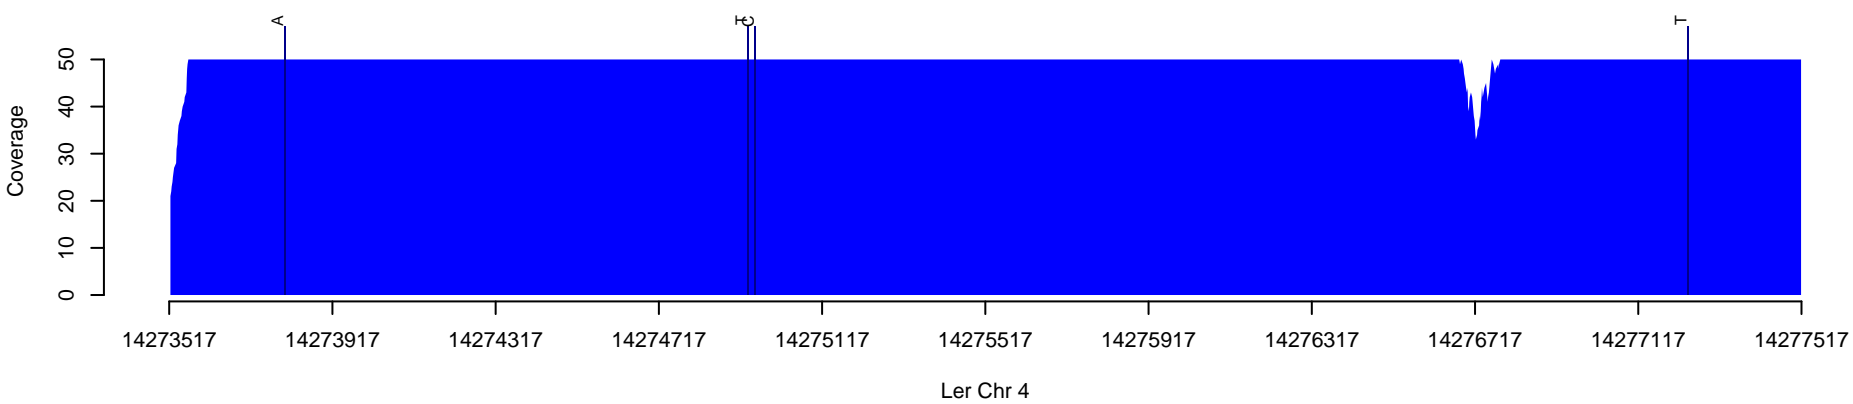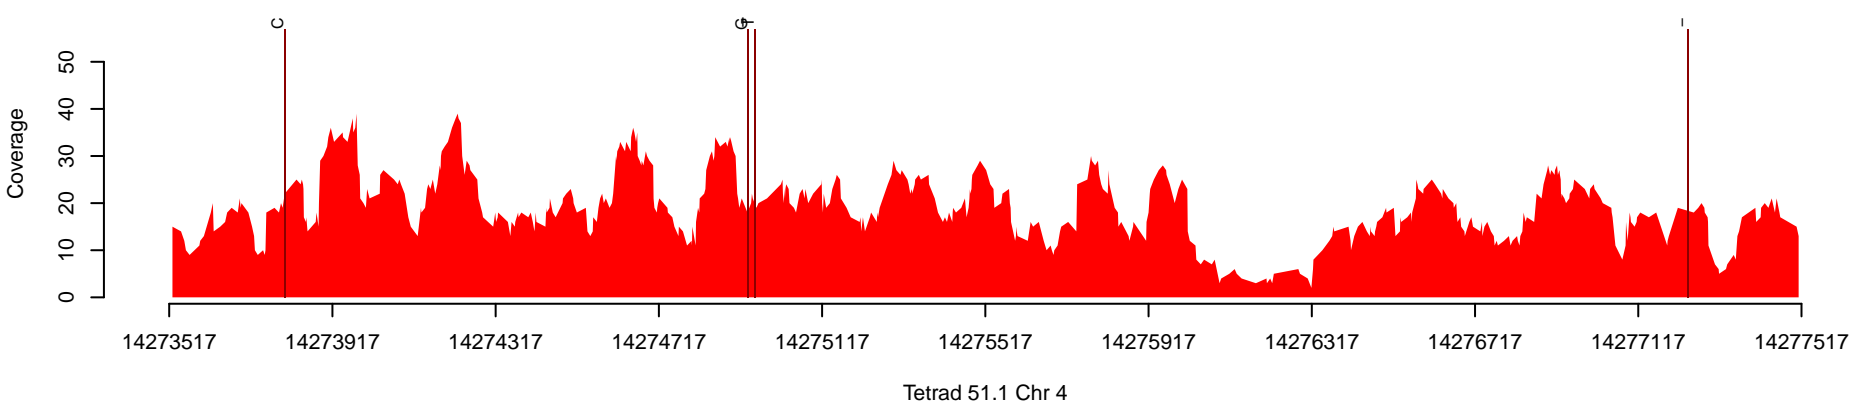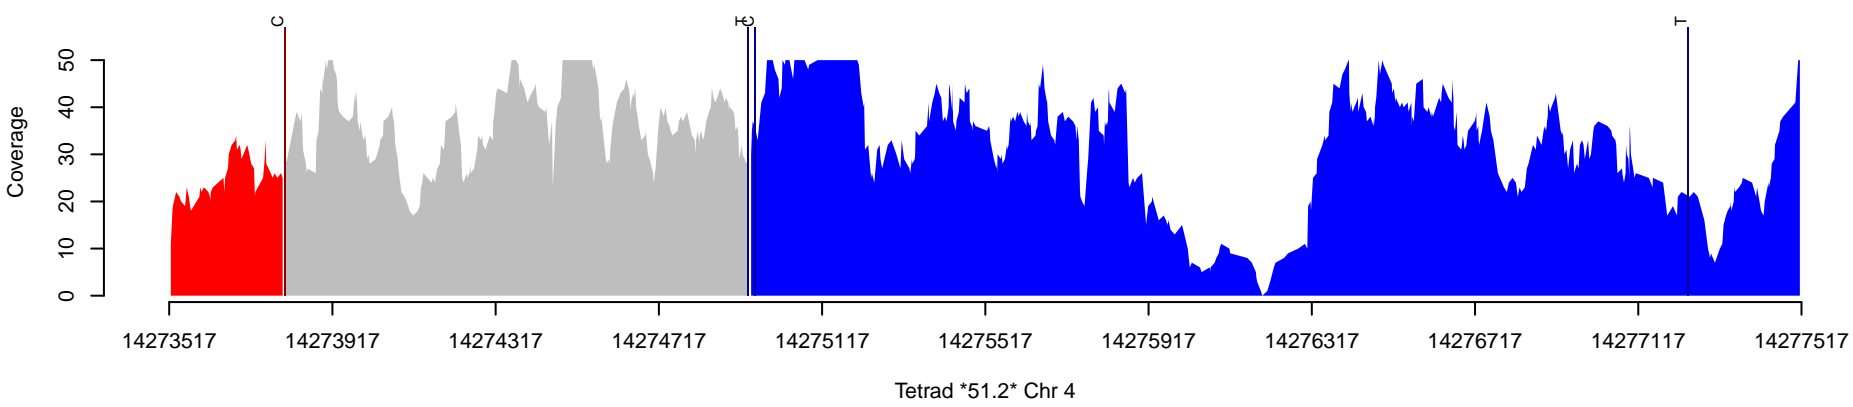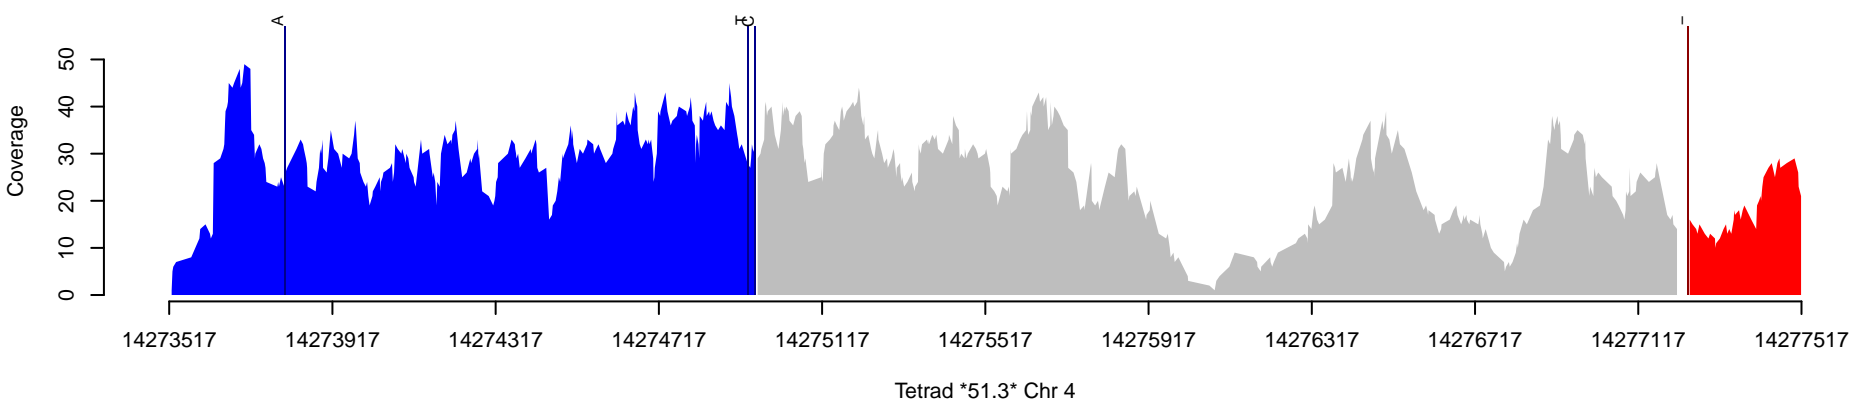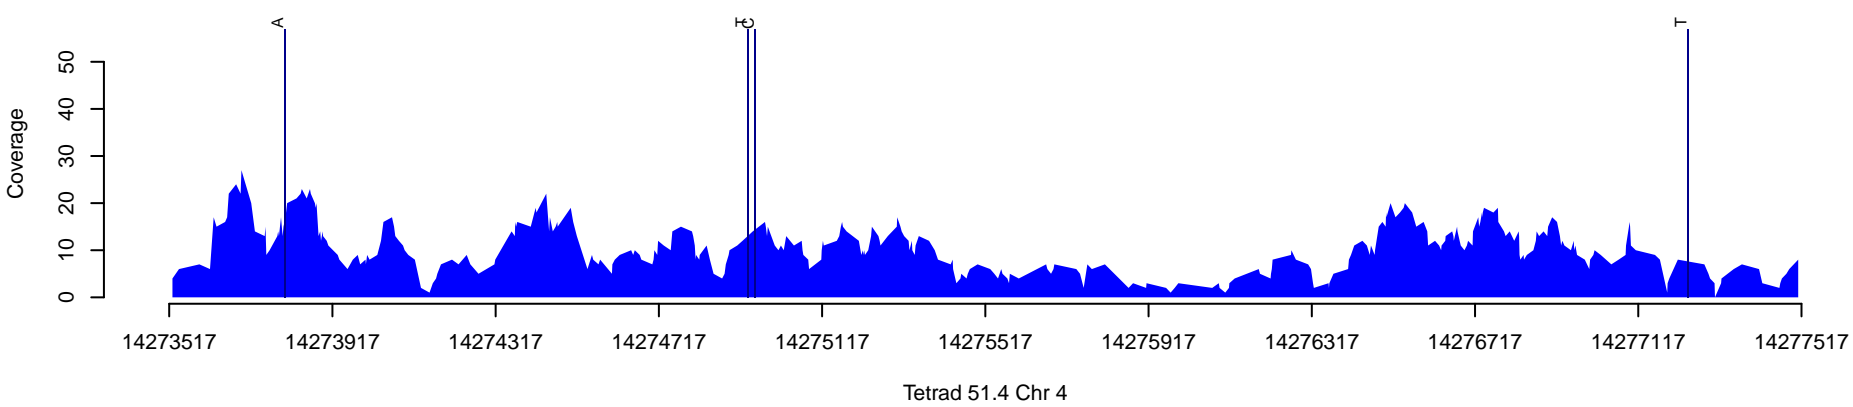

# ID67

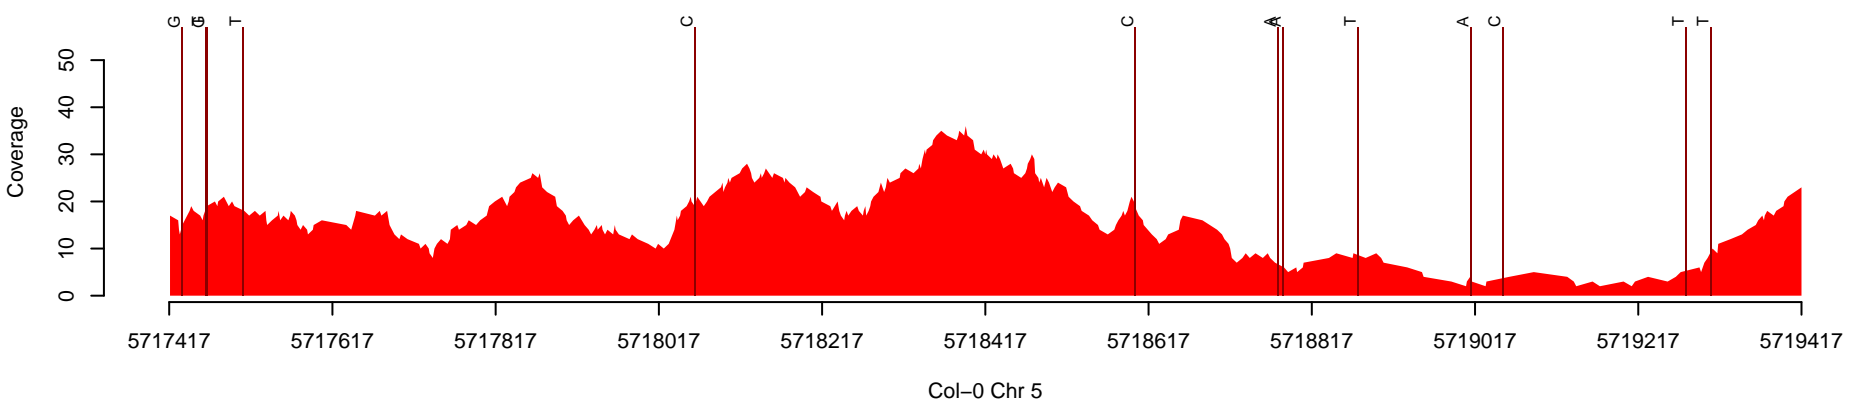

Col-0 Chr 5

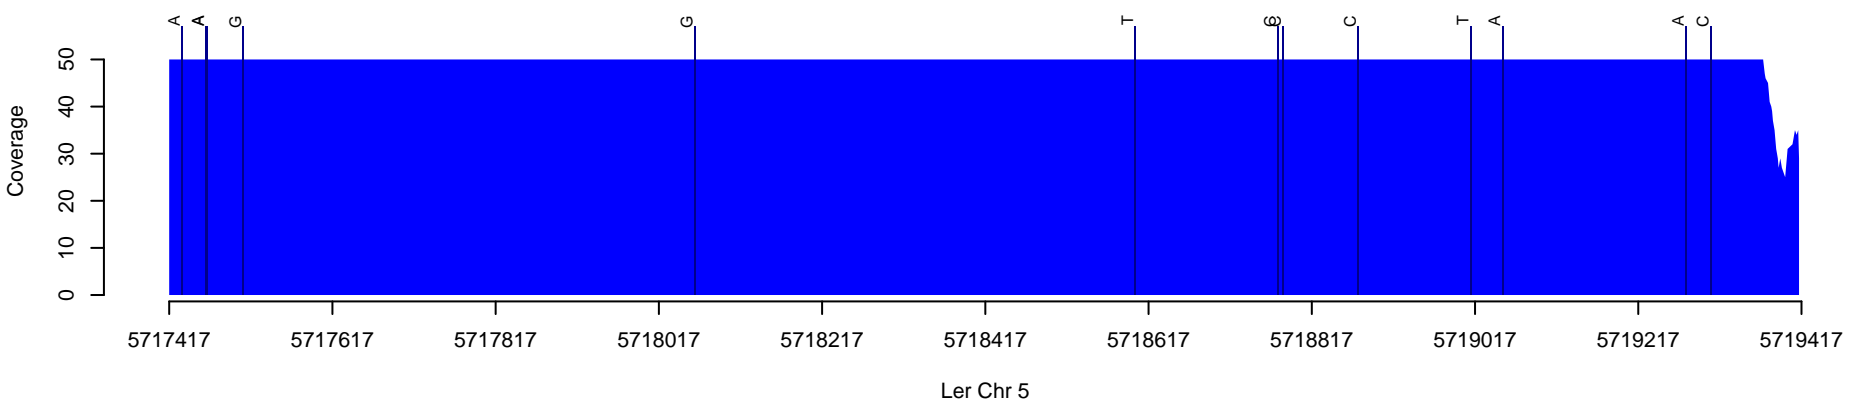

Ler Chr 5

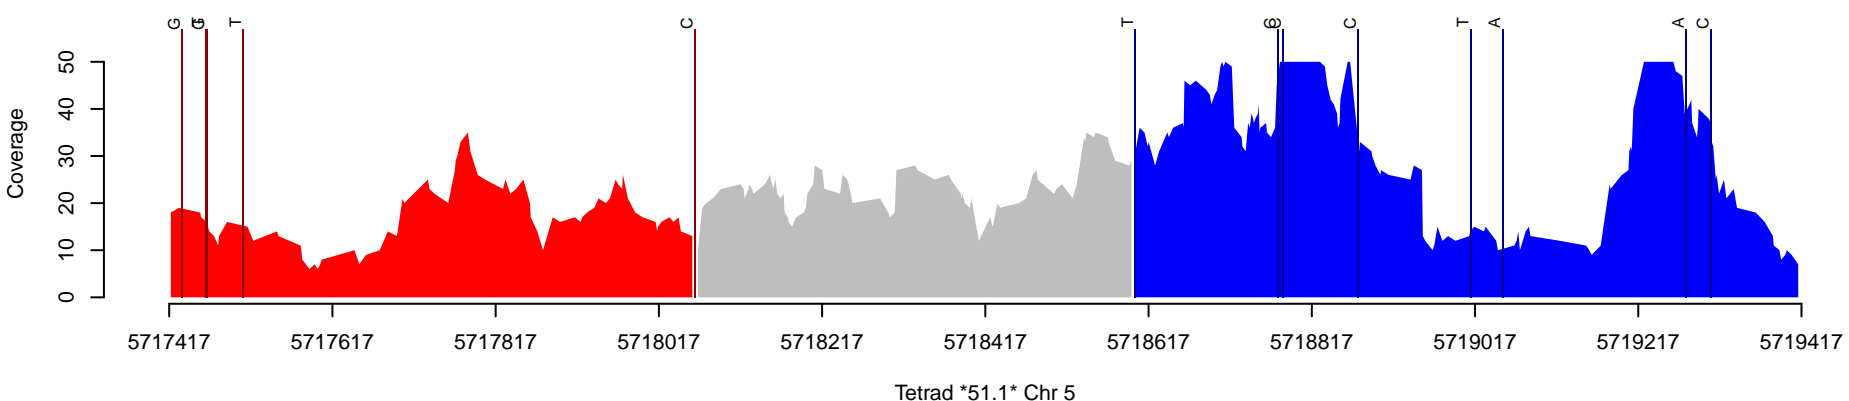

Tetrad \*51.1\* Chr 5

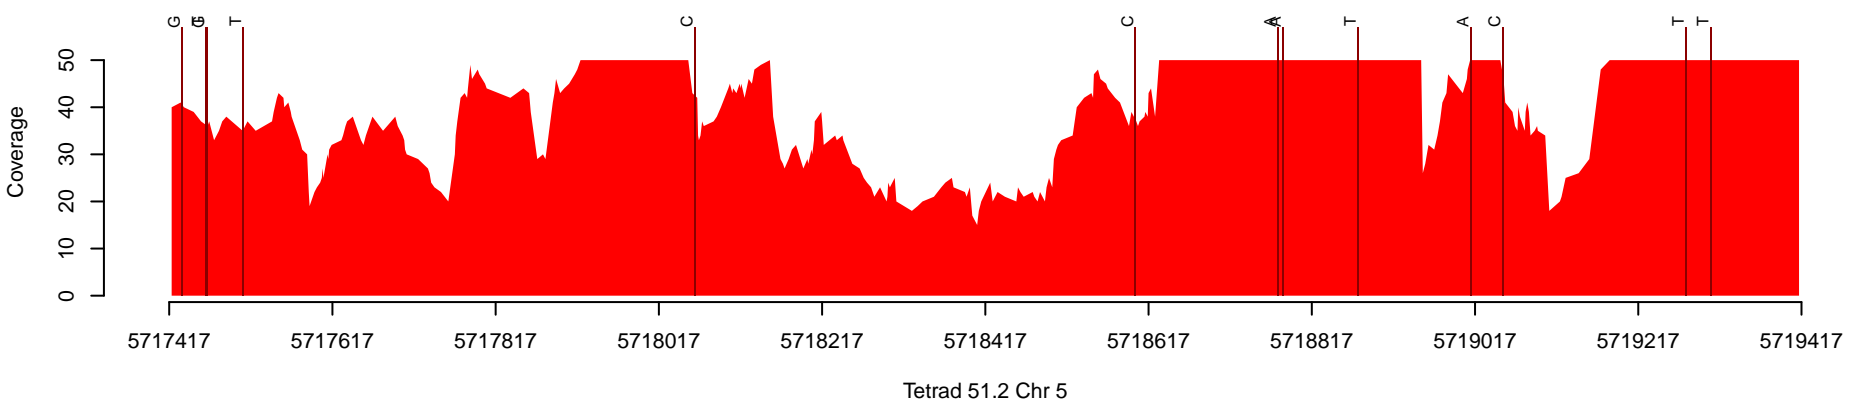

Tetrad 51.2 Chr 5

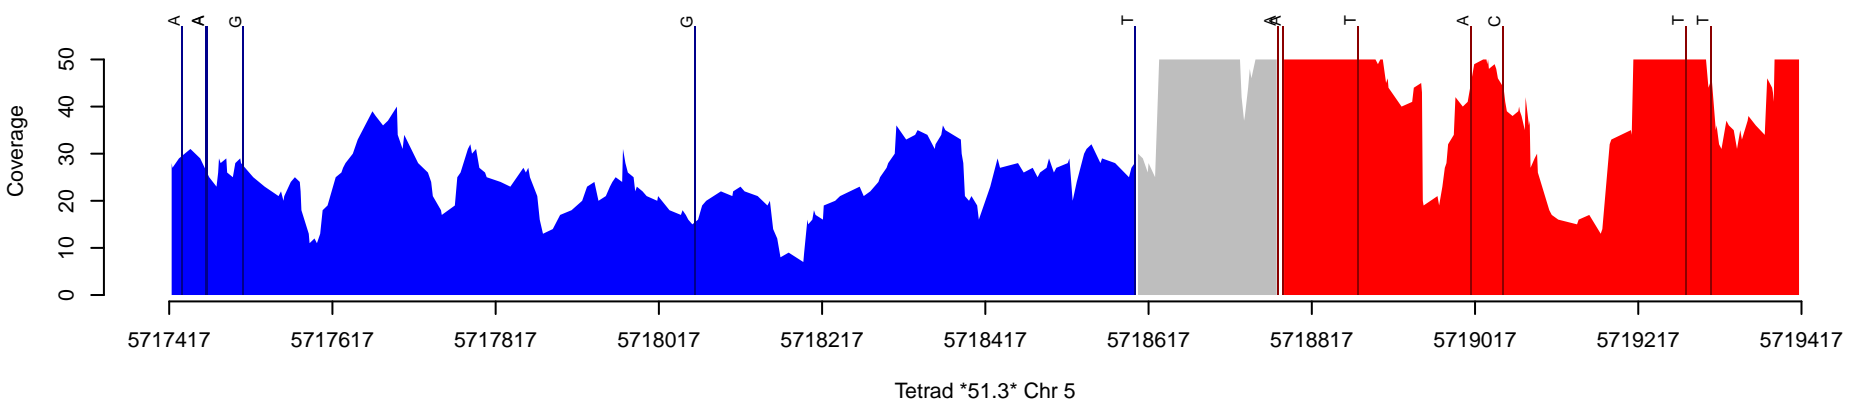

Tetrad \*51.3\* Chr 5

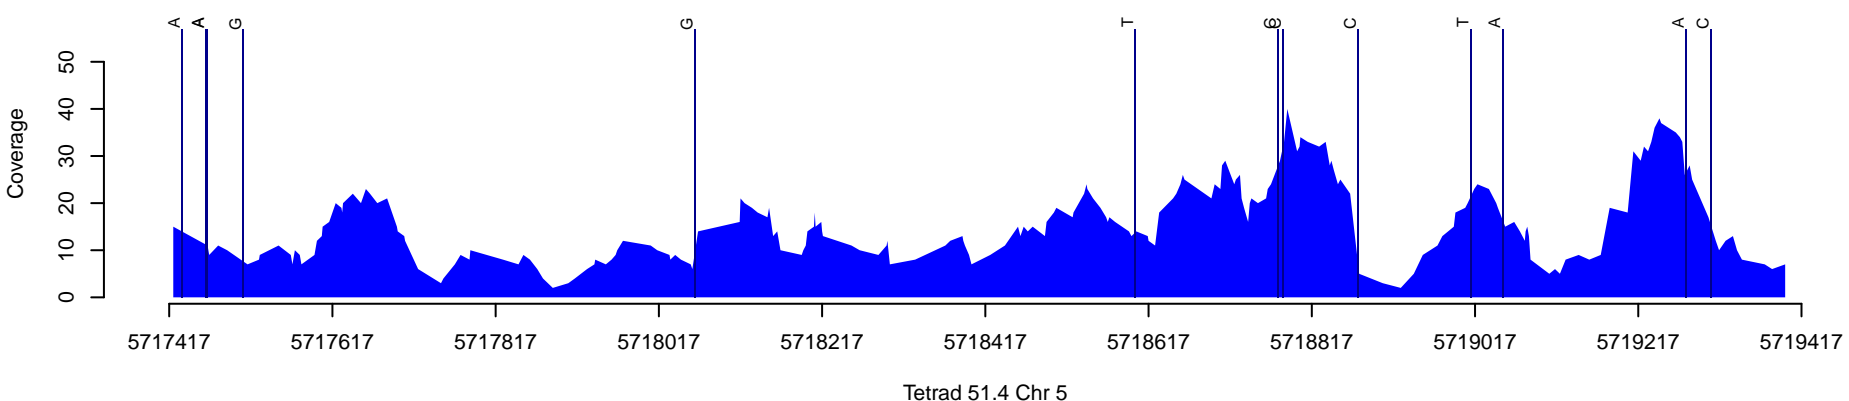

Tetrad 51.4 Chr 5

# ID68

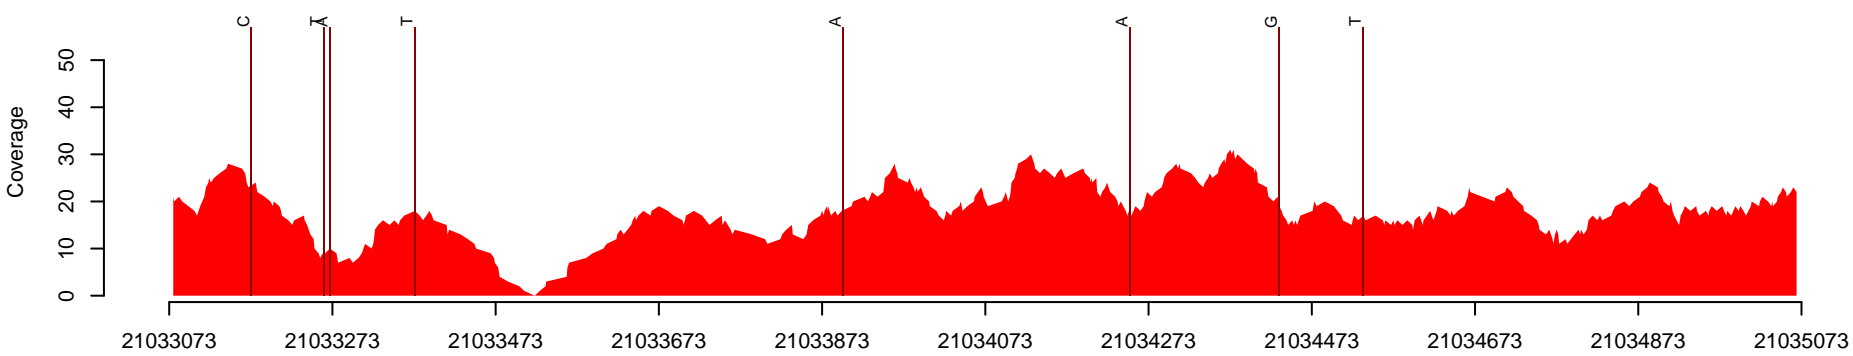

Col-0 Chr 5

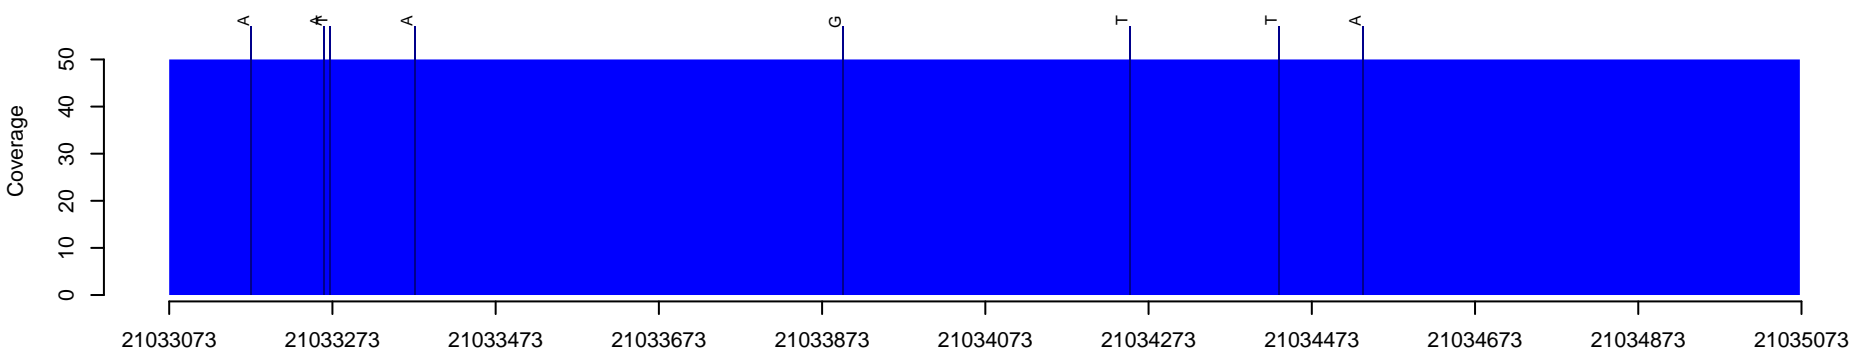

Ler Chr 5

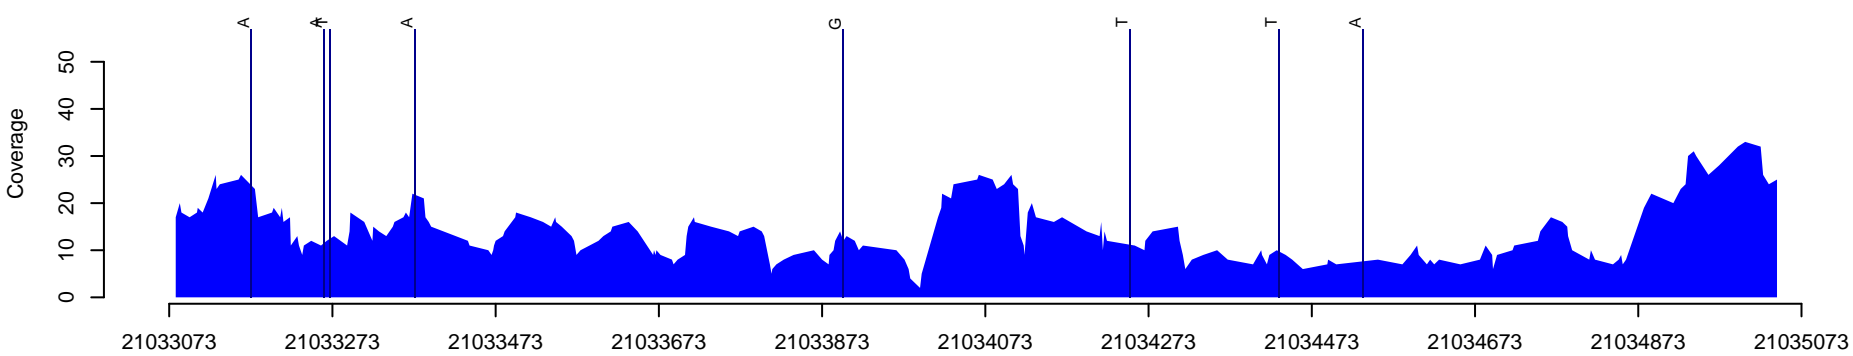

Tetrad 51.1 Chr 5

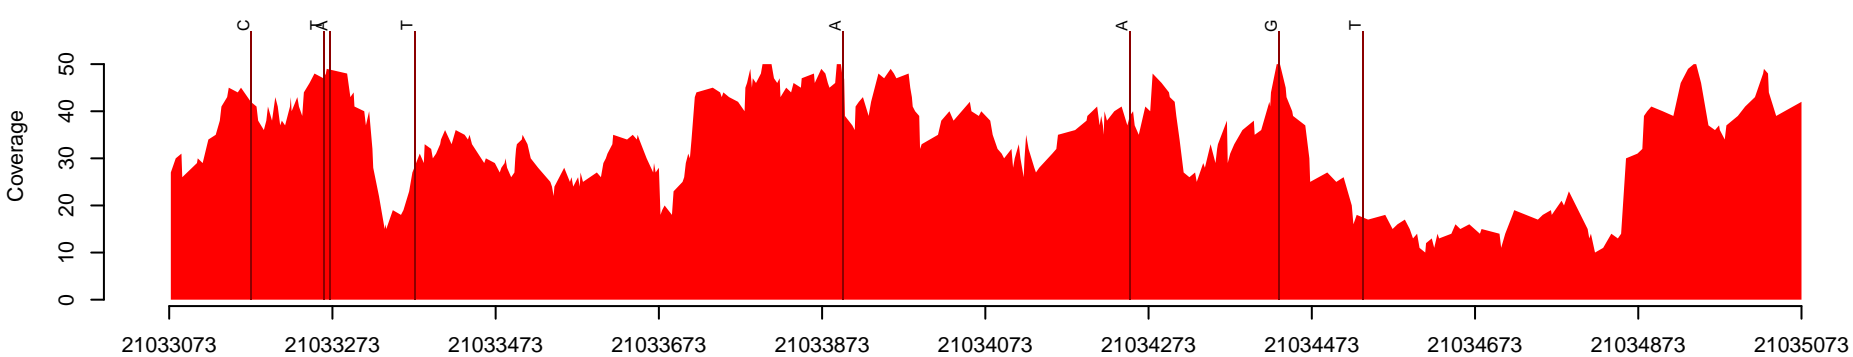

Tetrad 51.2 Chr 5

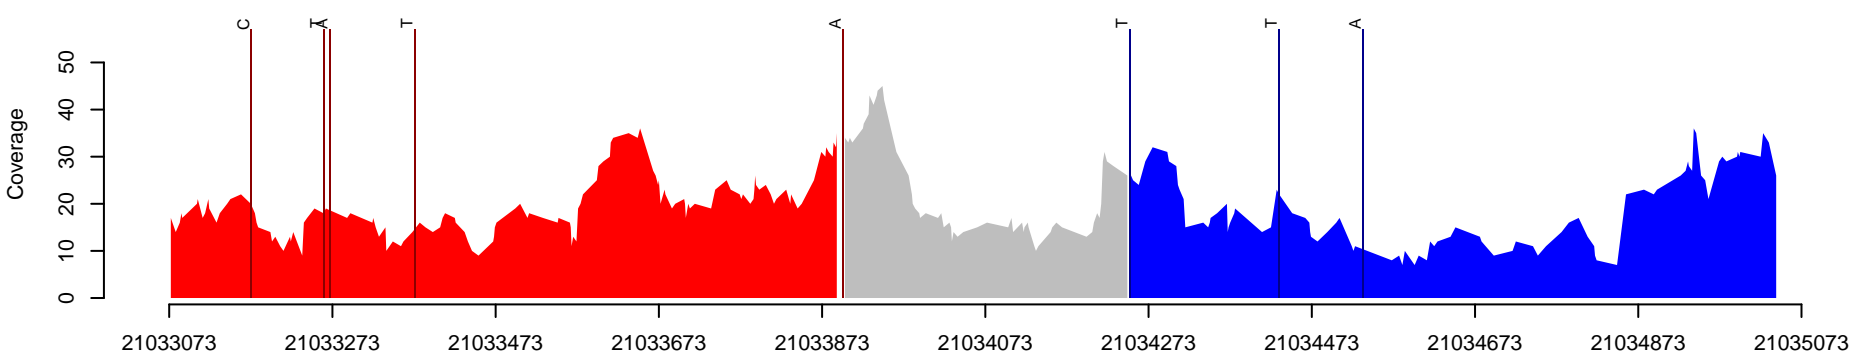

Tetrad \*51.3\* Chr 5

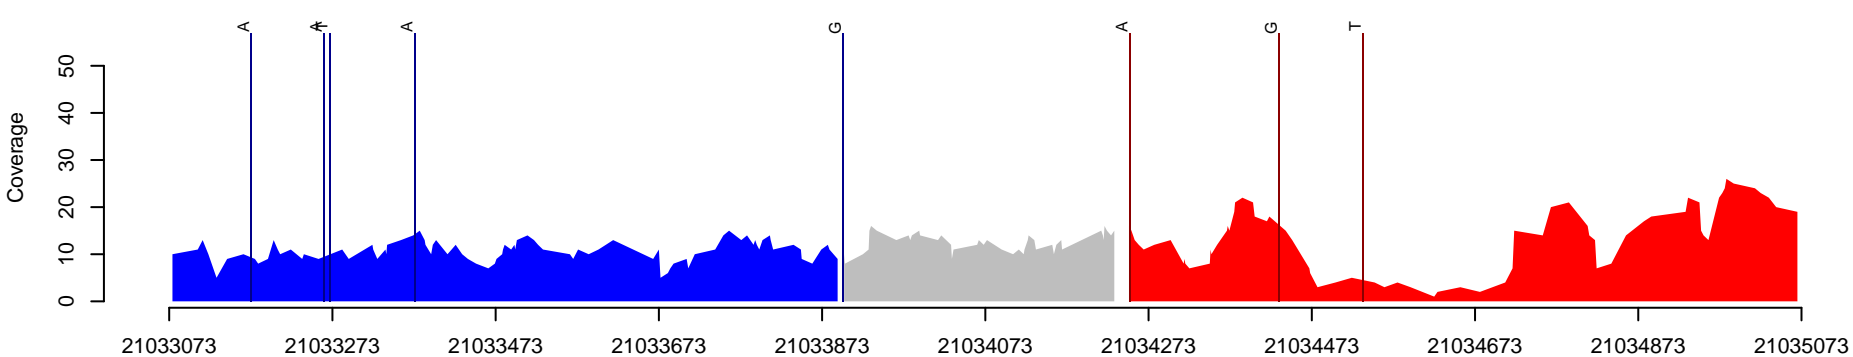

Tetrad \*51.4\* Chr 5

# ID69

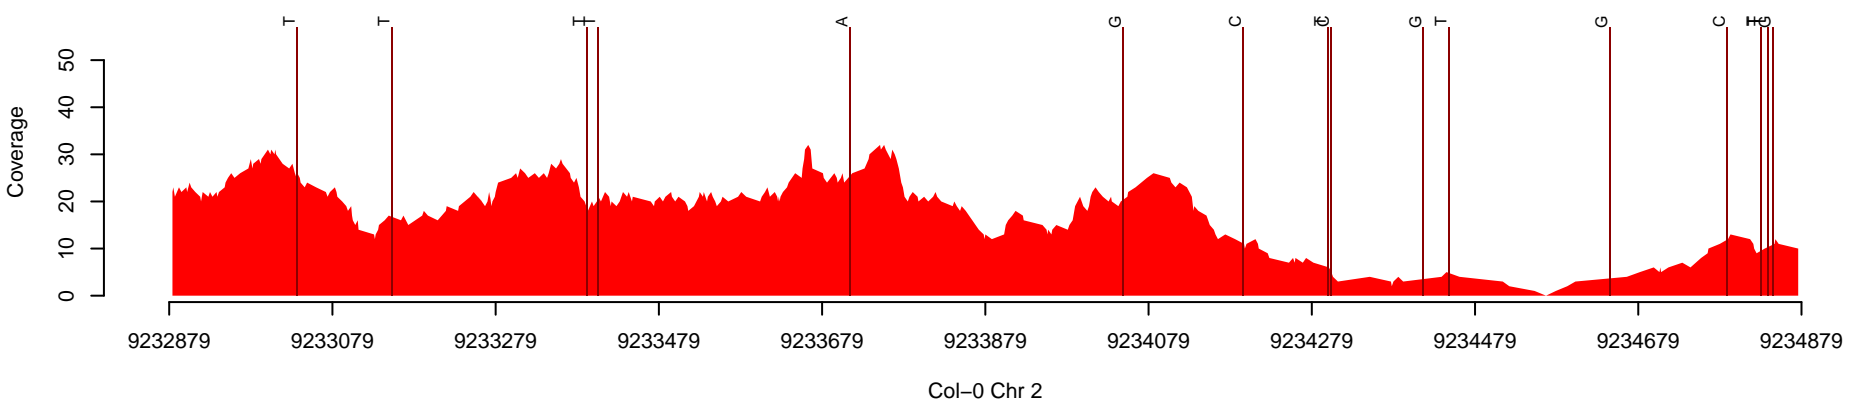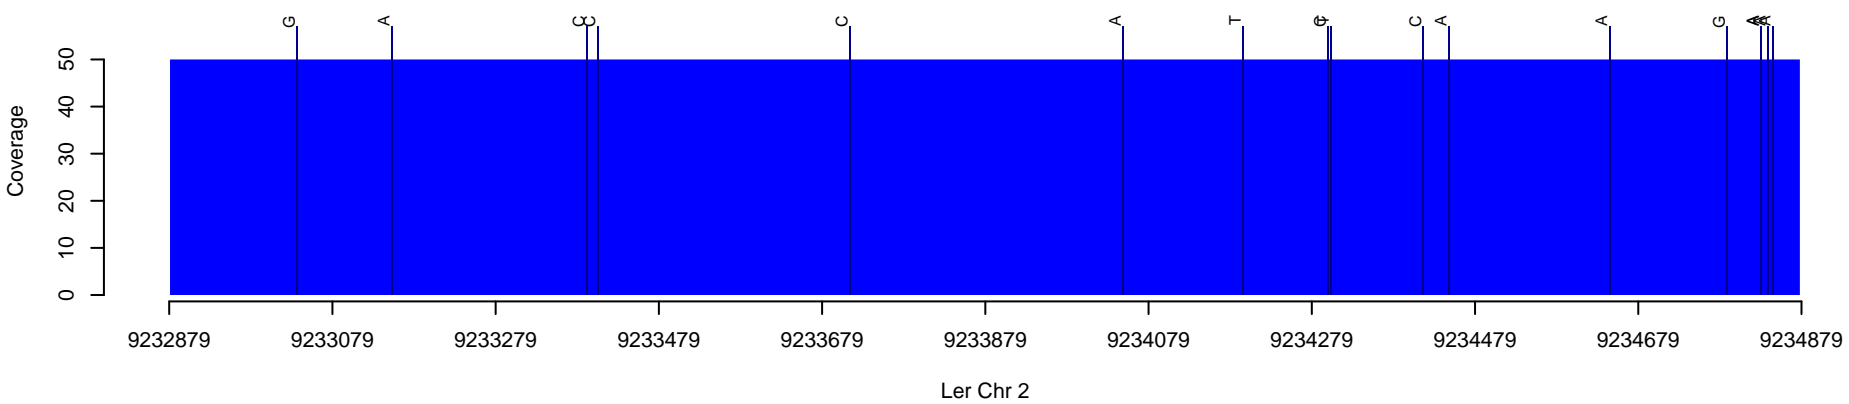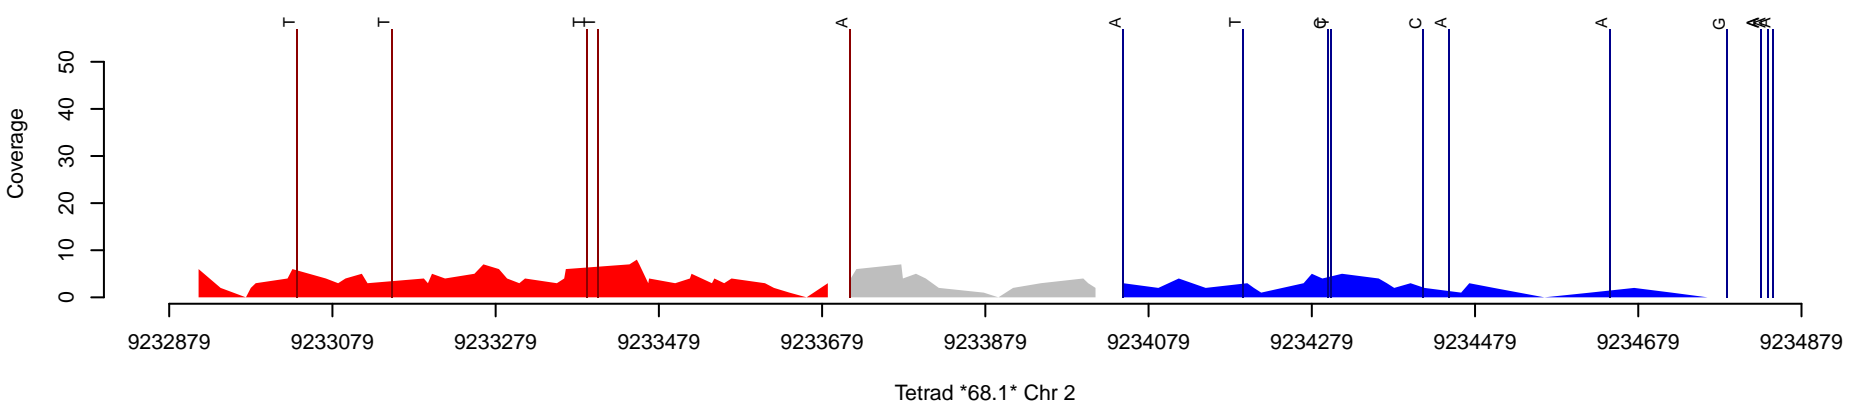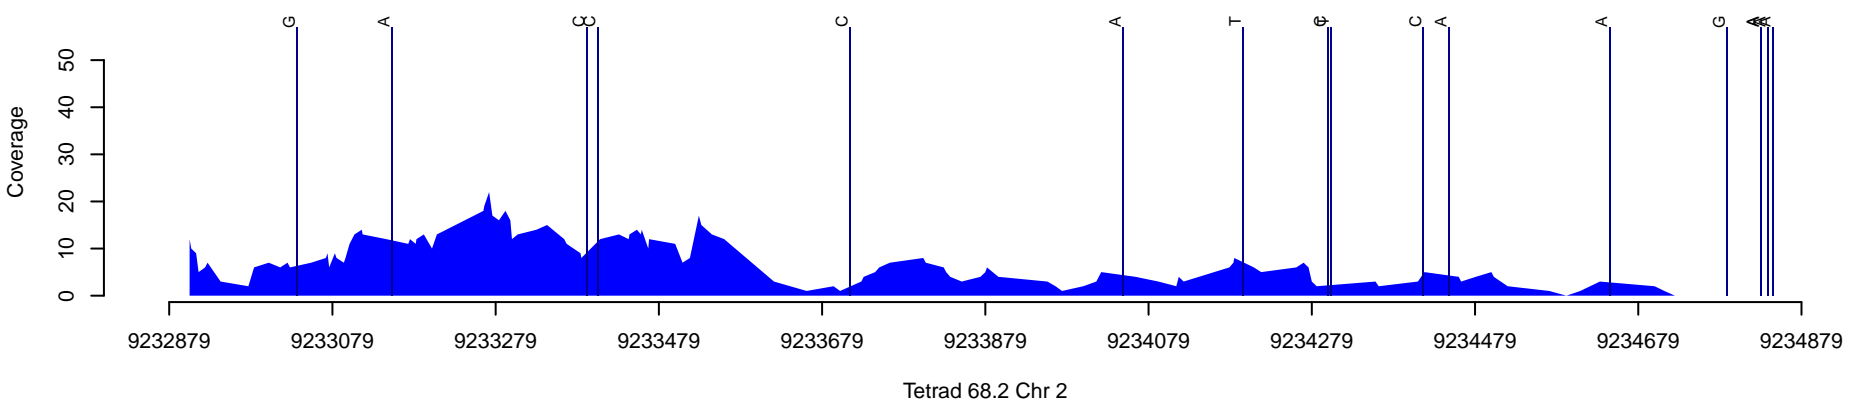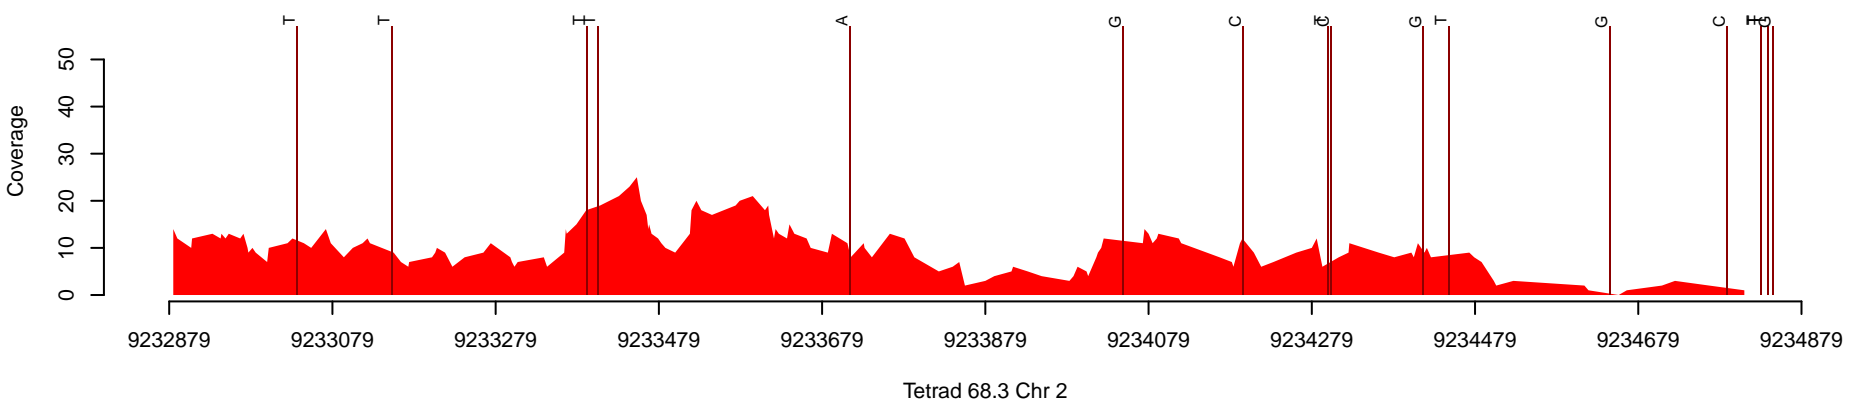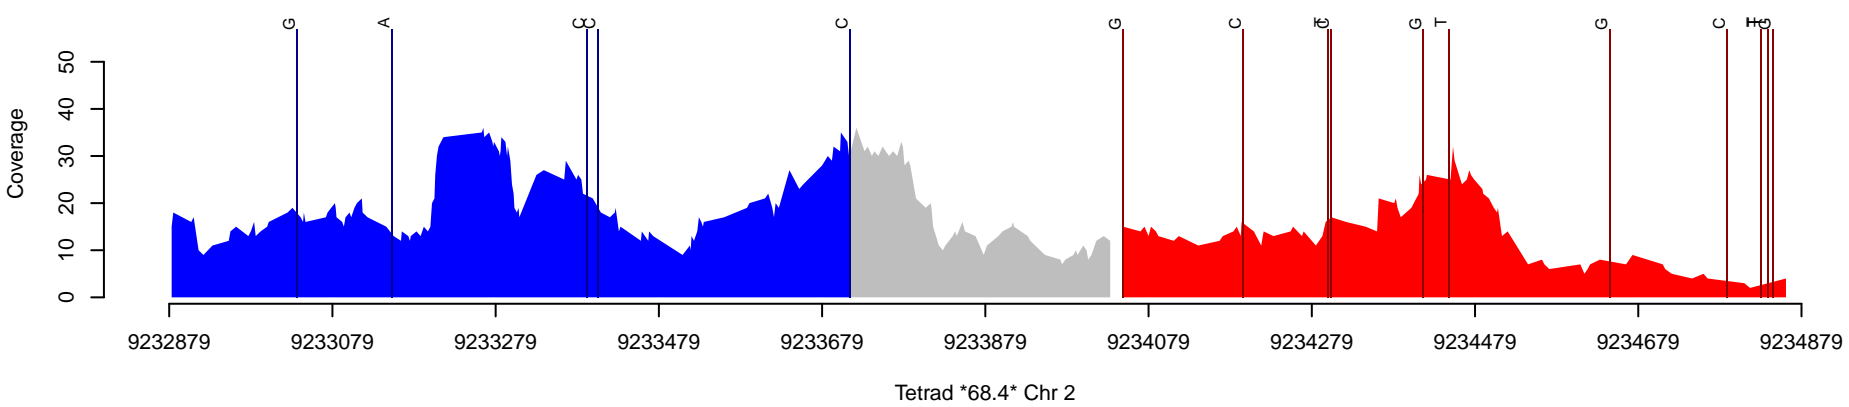

# ID70

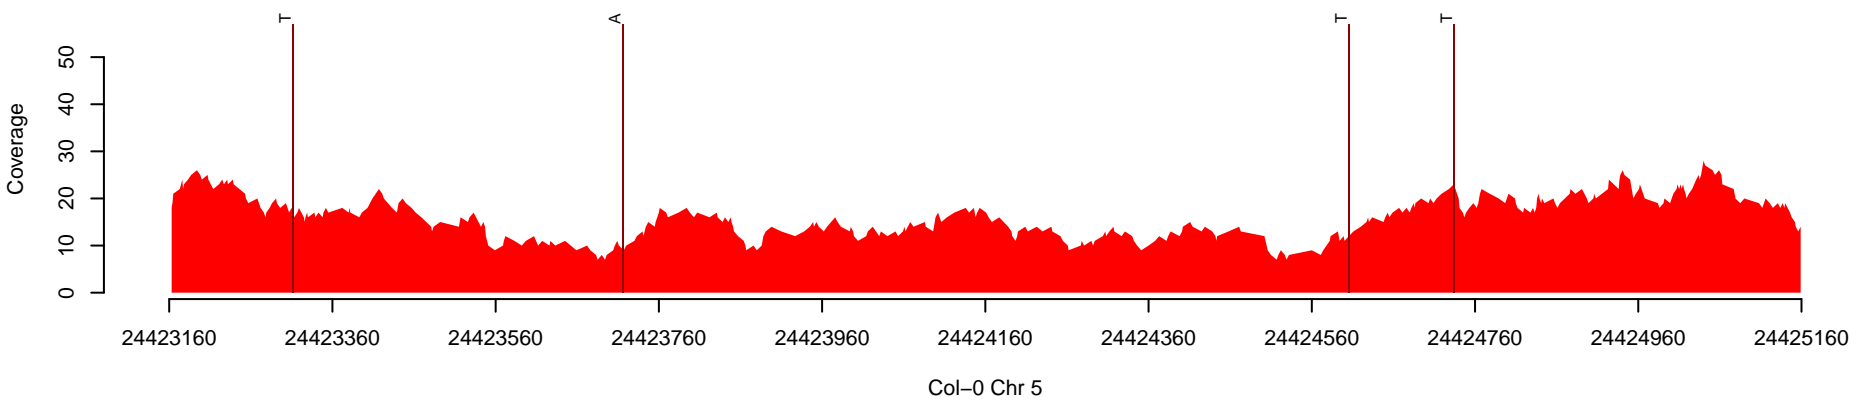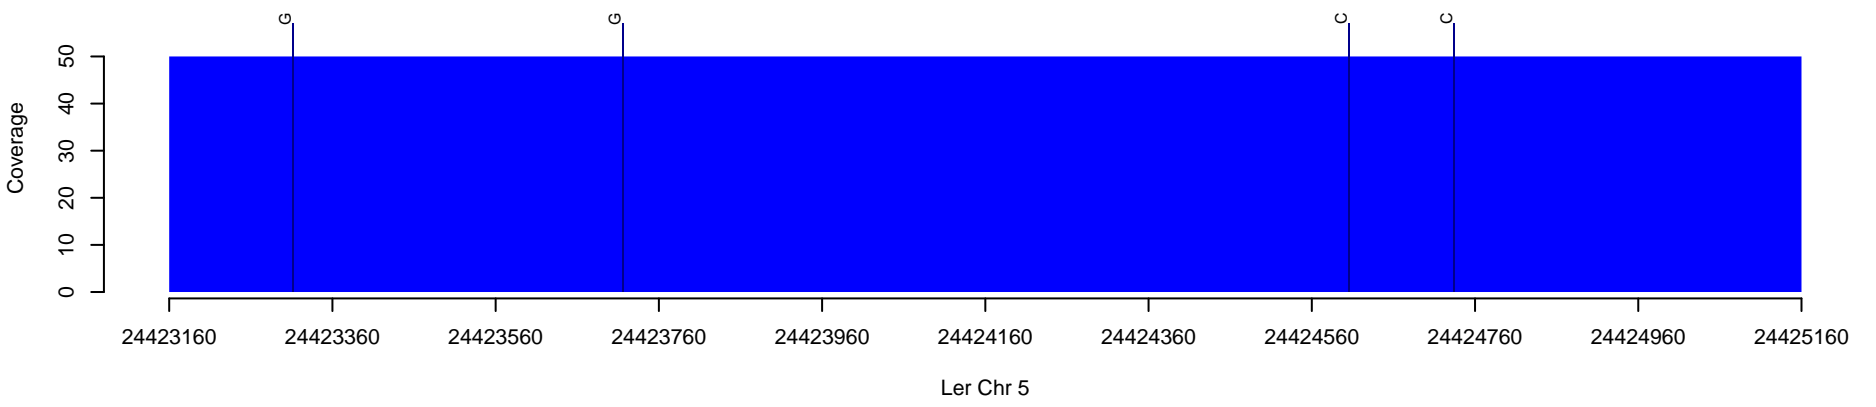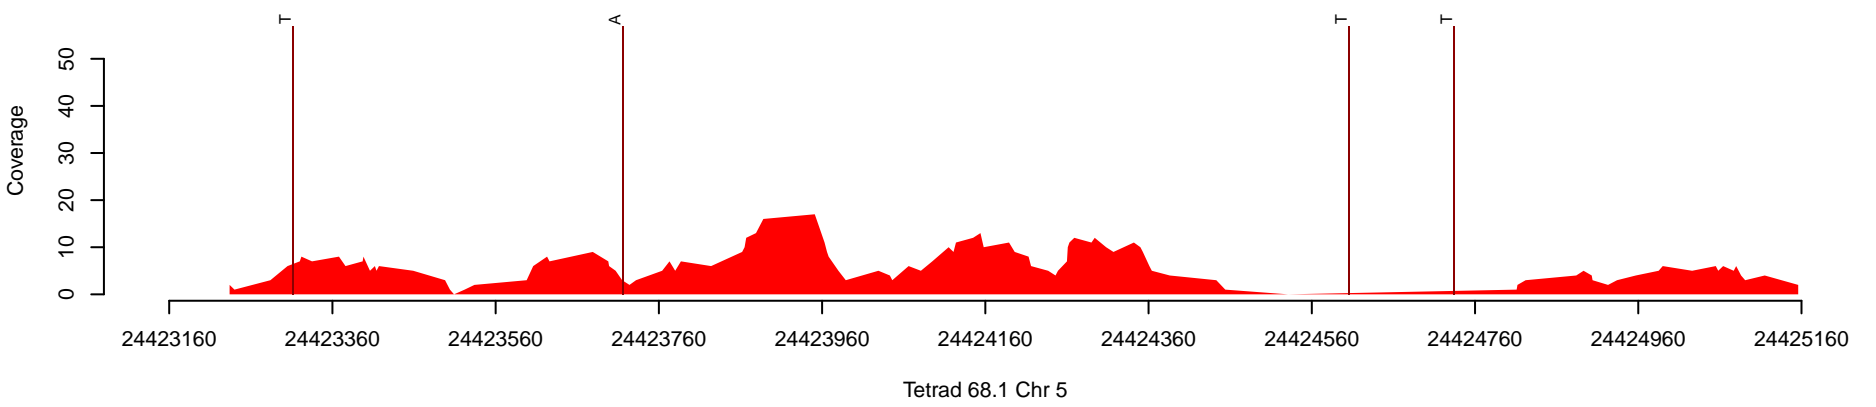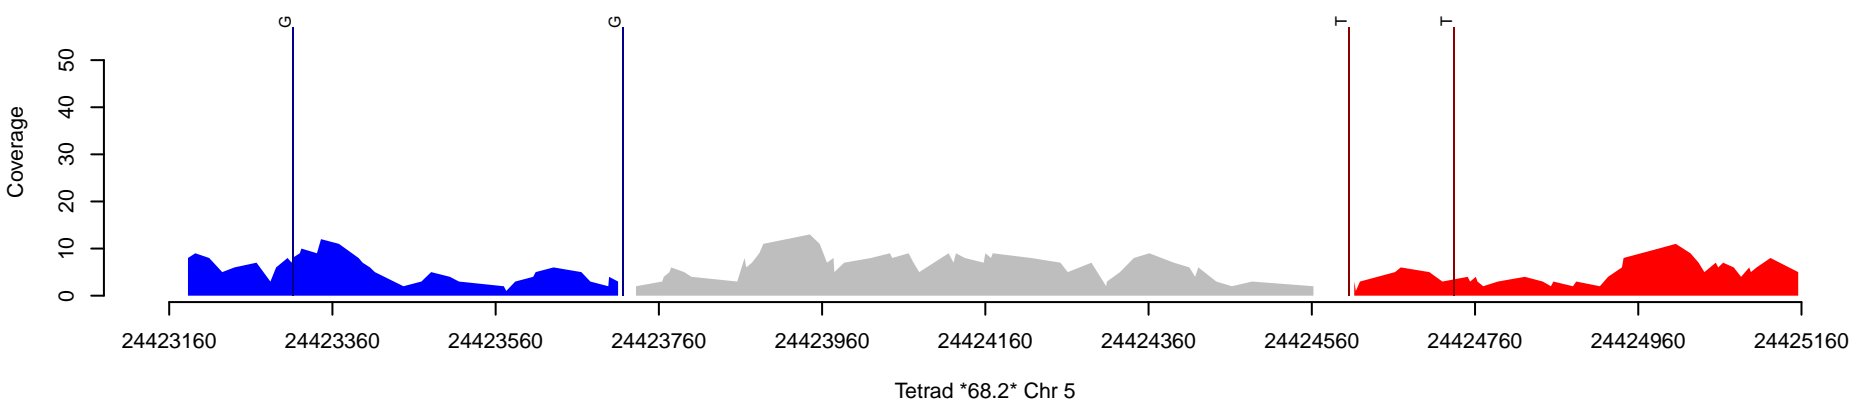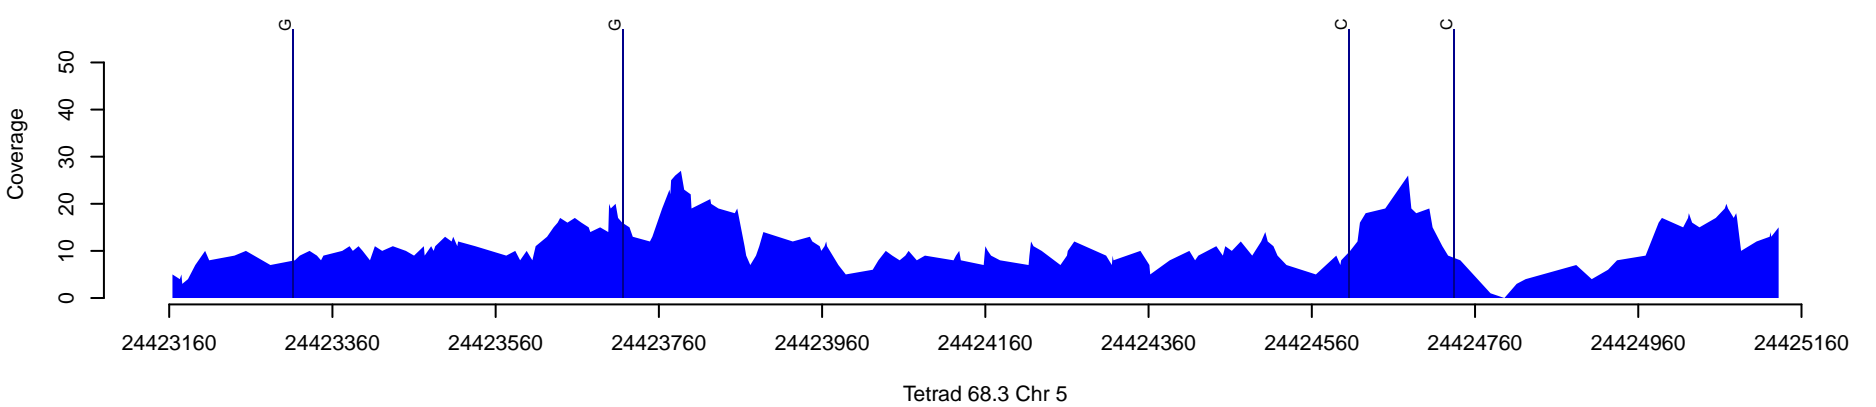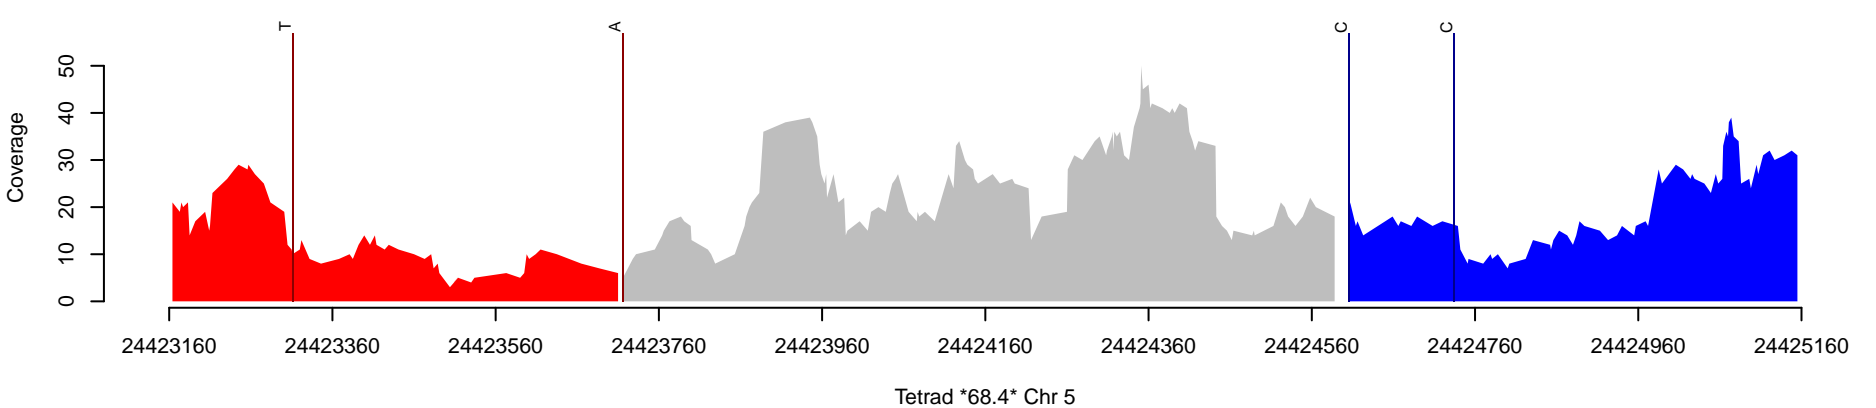

# ID71

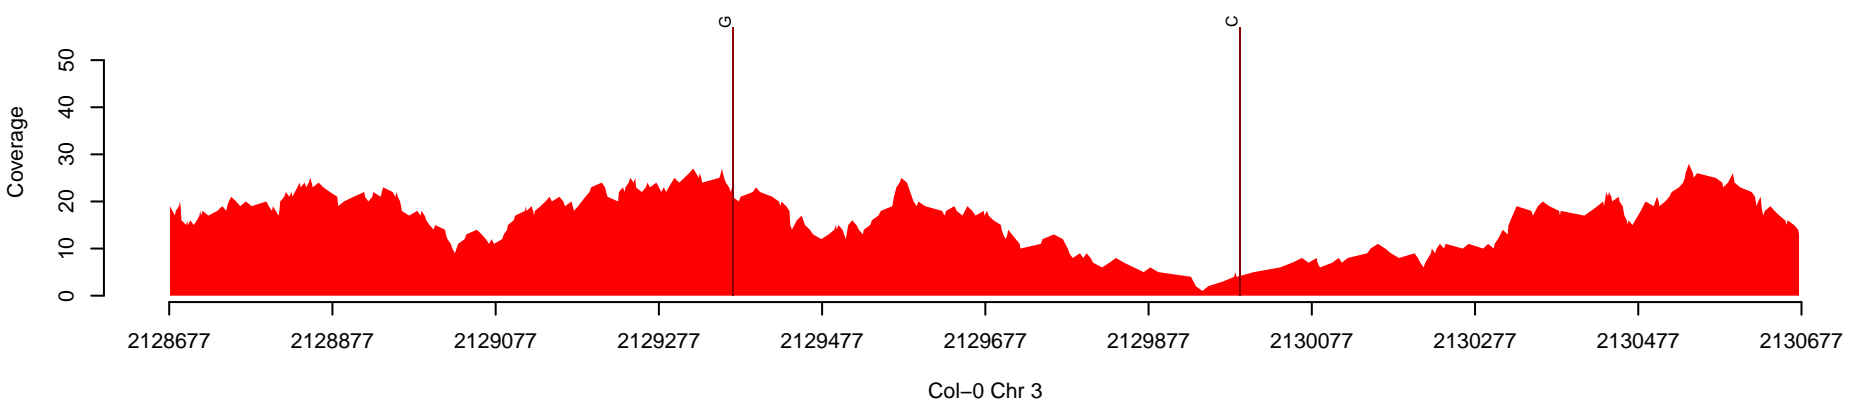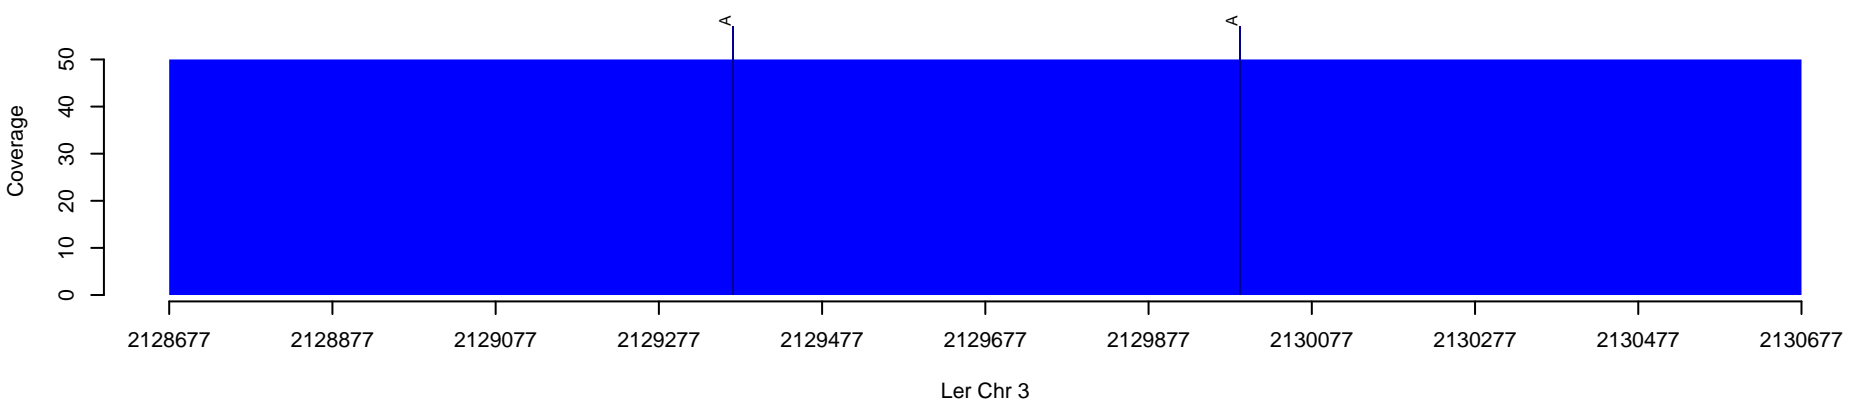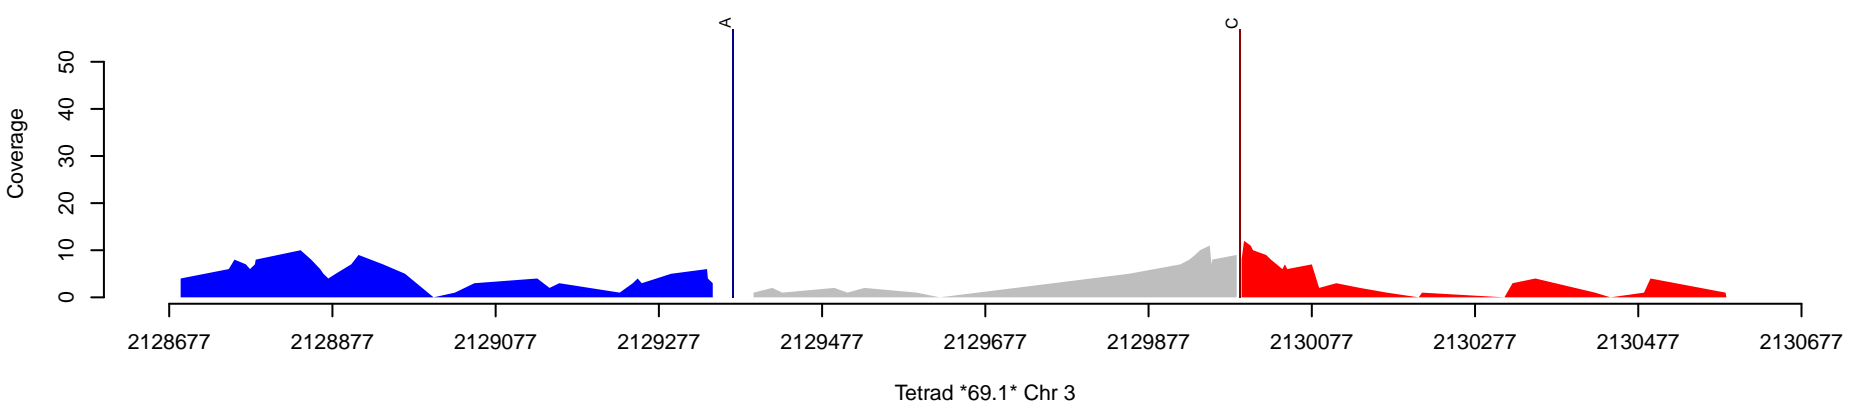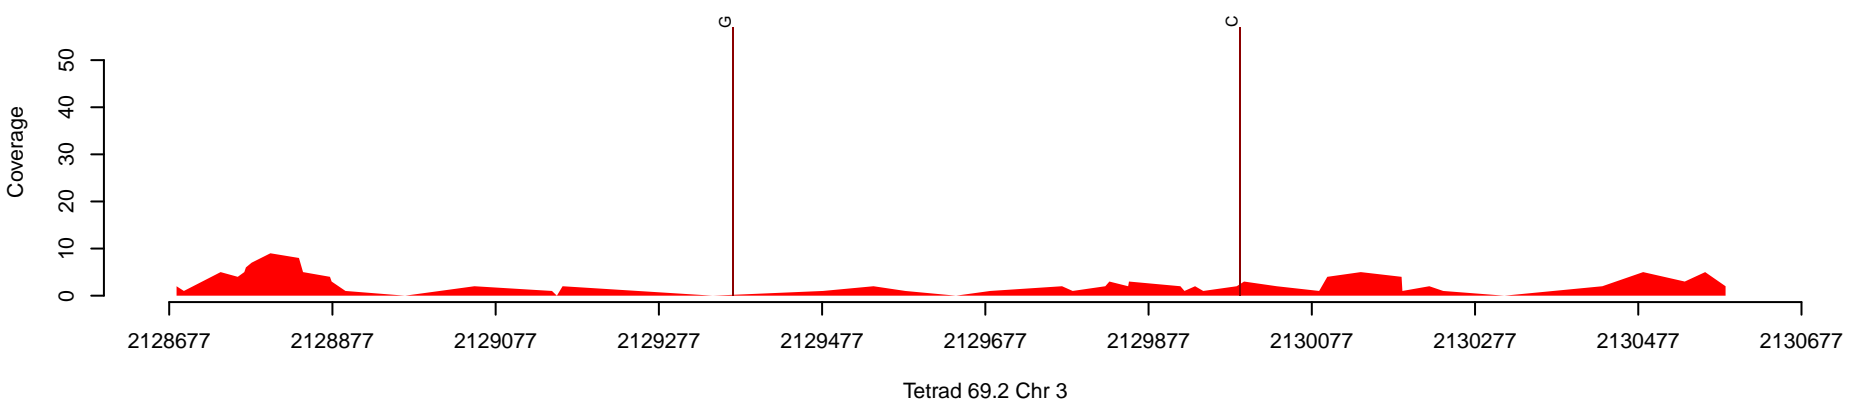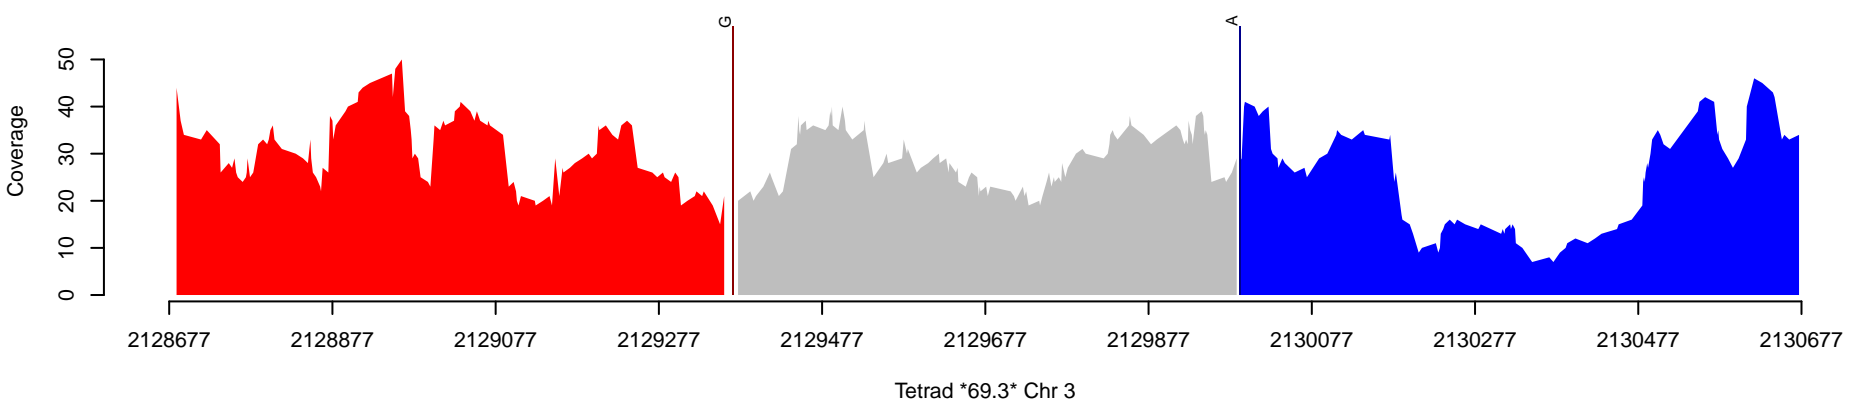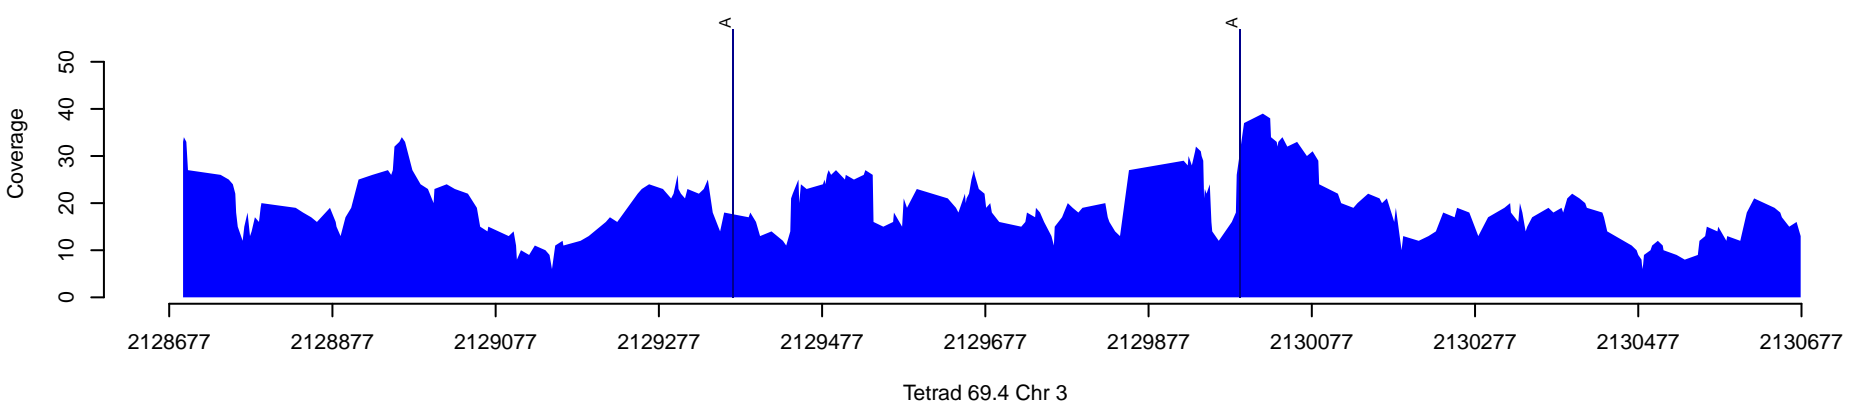

Supplement: elife01426s003.pdf [file elife01426s003.pdf]
